# Supplementary material for: Exploring the Potential Role and Mechanism of Quercetin in the Treatment of Primary Sjögren's Syndrome Based on Network Pharmacology, Molecular Docking, and Experimental Validation
Source: Research Square preprint supplement (doi:10.21203/rs.3.rs-6172274/v1), 2025-03-13
Supplement: Supplementary file 1 [file acda6146704521dc67318cf8.xlsx]

## Sheet: table S1
molecule_ID	target_ID	target_name	Gene name	source
MOL000296	TAR03216	Glutamate receptor 2	GRIA2	TCMSP
MOL000296	TAR01172	Lysozyme	LYZD2	TCMSP
MOL000296	TAR01143	Cytochrome P450 1A1	CYP1A1	TCMSP
MOL000296	TAR00727	Alcohol dehydrogenase 1C	ADH1C	TCMSP
MOL000296	TAR00216	Alpha-1B adrenergic receptor	ADRA1B	TCMSP
MOL000296	TAR00210	Muscarinic acetylcholine receptor M2	CHRM2	TCMSP
MOL000296	TAR00186	Sodium-dependent noradrenaline transporter	SLC6A2	TCMSP
MOL000296	TAR00172	CGMP-inhibited 3',5'-cyclic phosphodiesterase A	PDE3A	TCMSP
MOL000296	TAR00038	Muscarinic acetylcholine receptor M1	CHRM1	TCMSP
MOL000296	TAR00016	Muscarinic acetylcholine receptor M3	CHRM3	TCMSP
MOL000283	TAR00209	Progesterone receptor	PGR	TCMSP
MOL000280	TAR00308	Glucocorticoid receptor	NR3C1	TCMSP
MOL000273	TAR00252	Mineralocorticoid receptor	NR3C2	TCMSP
MOL000098	TAR03978	Interleukin-2	IL2	TCMSP
MOL000098	TAR03688	Glutathione S-transferase Mu 2	GSTM2	TCMSP
MOL000098	TAR03276	Nuclear receptor coactivator 2	NCOA2	TCMSP
MOL000098	TAR03204	Aryl hydrocarbon receptor	AHR	TCMSP
MOL000098	TAR03025	Cyclin-A2	CCNA2	TCMSP
MOL000098	TAR02998	Prostatic acid phosphatase	ACP3	TCMSP
MOL000098	TAR02952	Glutathione S-transferase Mu 1	GSTM1	TCMSP
MOL000098	TAR02928	Trypsin-1	PRSS1	TCMSP
MOL000098	TAR02915	Retinoblastoma-associated protein	RB1	TCMSP
MOL000098	TAR02132	Heme oxygenase 1	HMOX1	TCMSP
MOL000098	TAR01293	DNA topoisomerase 1	TOP1	TCMSP
MOL000098	TAR00781	Collagen alpha-1	COL16A1	TCMSP
MOL000098	TAR00744	NADPH--cytochrome P450 reductase	POR	TCMSP
MOL000098	TAR00740	Vascular endothelial growth factor A	VEGFA	TCMSP
MOL000098	TAR00734	Pro-epidermal growth factor	EGF	TCMSP
MOL000098	TAR00733	Glutathione S-transferase P	GSTP1	TCMSP
MOL000098	TAR00724	Cytochrome P450 1A2	CYP1A2	TCMSP
MOL000098	TAR00647	Serine/threonine-protein kinase Chk1	CHEK1	TCMSP
MOL000098	TAR00646	Cellular tumor antigen p53	TP53	TCMSP
MOL000098	TAR00621	Cytochrome P450 3A4	CYP3A4	TCMSP
MOL000098	TAR00597	Superoxide dismutase [Cu-Zn]	SOD1	TCMSP
MOL000098	TAR00593	Prostaglandin E2 receptor EP3 subtype	PTGER3	TCMSP
MOL000098	TAR00565	Amine oxidase [flavin-containing] B	MAOB	TCMSP
MOL000098	TAR00482	Putative beta-lactamase-like 1	LACTBL1	TCMSP
MOL000098	TAR00466	Tissue factor	F3	TCMSP
MOL000098	TAR00457	Thrombomodulin	THBD	TCMSP
MOL000098	TAR00441	Stromelysin-1	MMP3	TCMSP
MOL000098	TAR00440	Vascular cell adhesion protein 1	VCAM1	TCMSP
MOL000098	TAR00436	Gap junction alpha-1 protein	GJA1	TCMSP
MOL000098	TAR00434	Tissue-type plasminogen activator	PLAT	TCMSP
MOL000098	TAR00428	Myeloperoxidase	MPO	TCMSP
MOL000098	TAR00427	E-selectin	SELE	TCMSP
MOL000098	TAR00422	Glycogen synthase kinase-3 beta	GSK3B	TCMSP
MOL000098	TAR00418	Interleukin-1 beta	IL1B	TCMSP
MOL000098	TAR00417	C-C motif chemokine 2	CCL2	TCMSP
MOL000098	TAR00414	Transcription factor AP-1	JUN	TCMSP
MOL000098	TAR00402	Mitogen-activated protein kinase 14	MAPK14	TCMSP
MOL000098	TAR00365	Interferon gamma	IFNG	TCMSP
MOL000098	TAR00363	Cathepsin D	CTSD	TCMSP
MOL000098	TAR00357	Serum paraoxonase/arylesterase 1	PON1	TCMSP
MOL000098	TAR00354	Mitogen-activated protein kinase 1	MAPK1	TCMSP
MOL000098	TAR00353	Interstitial collagenase	MMP1	TCMSP
MOL000098	TAR00351	Interleukin-6	IL6	TCMSP
MOL000098	TAR00346	Urokinase-type plasminogen activator	PLAU	TCMSP
MOL000098	TAR00318	NAD	SARM1	TCMSP
MOL000098	TAR00309	Gamma-aminobutyric acid receptor subunit alpha-1	GABRA1	TCMSP
MOL000098	TAR00307	Estrogen receptor beta	ESR2	TCMSP
MOL000098	TAR00298	Epidermal growth factor receptor	EGFR	TCMSP
MOL000098	TAR00265	Tumor necrosis factor	TNF	TCMSP
MOL000098	TAR00261	Beta-2 adrenergic receptor	ADRB2	TCMSP
MOL000098	TAR00238	72 kDa type IV collagenase	MMP2	TCMSP
MOL000098	TAR00231	Acetyl-CoA carboxylase 1	ACACA	TCMSP
MOL000098	TAR00165	Acetylcholinesterase	ACHE	TCMSP
MOL000098	TAR00158	Retinoic acid receptor RXR-alpha	RXRA	TCMSP
MOL000098	TAR00153	Ornithine decarboxylase	ODC1	TCMSP
MOL000098	TAR00123	Coagulation factor VII	F7	TCMSP
MOL000098	TAR00117	DNA topoisomerase	TOP3A	TCMSP
MOL000098	TAR00094	Prostaglandin G/H synthase 2	PTGS2	TCMSP
MOL000098	TAR00086	Apoptosis regulator Bcl-2	BCL2	TCMSP
MOL000098	TAR00079	Carbonic anhydrase	CA12	TCMSP
MOL000098	TAR00070	Sodium channel protein type 5 subunit alpha	SCN5A	TCMSP
MOL000098	TAR00048	Androgen receptor	AR	TCMSP
MOL000098	TAR00046	Estrogen receptor	ESR1	TCMSP
MOL000098	TAR00037	Potassium voltage-gated channel subfamily H member 2	KCNH2	TCMSP
MOL000098	TAR00011	Insulin receptor	INSR	TCMSP
MOL000098	TAR00006	Prostaglandin G/H synthase 1	PTGS1	TCMSP
MOL000098	TAR00003	Nitric oxide synthase, inducible	NOS2	TCMSP
		Tyrosinase	TYR	SwissTargetPrediction
		Transthyretin	TTR	SwissTargetPrediction
		Tyrosine-protein kinase SYK	SYK	SwissTargetPrediction
		Solute carrier family 22 member 12	SLC22A12	SwissTargetPrediction
		Receptor-type tyrosine-protein phosphatase S	PTPRS	SwissTargetPrediction
		Focal adhesion kinase 1	PTK2	SwissTargetPrediction
		Protein kinase C beta type	PRKCB	SwissTargetPrediction
		Serine/threonine-protein kinase PLK1	PLK1	SwissTargetPrediction
		Phospholipase A2	PLA2G1B	SwissTargetPrediction
		Serine/threonine-protein kinase pim-1	PIM1	SwissTargetPrediction
		NADPH oxidase 4	NOX4	SwissTargetPrediction
		Serine/threonine-protein kinase NEK6	NEK6	SwissTargetPrediction
		Serine/threonine-protein kinase NEK2	NEK2	SwissTargetPrediction
		Myosin light chain kinase, smooth muscle	MYLK	SwissTargetPrediction
		DNA-3-methyladenine glycosylase	MPG	SwissTargetPrediction
		Matrix metalloproteinase-9	MMP9	SwissTargetPrediction
		Hepatocyte growth factor receptor	MET	SwissTargetPrediction
		Microtubule-associated protein tau	MAPT	SwissTargetPrediction
		Monoamine oxidase A	MAOA	SwissTargetPrediction
		Vascular endothelial growth factor receptor 2	KDR	SwissTargetPrediction
		G-protein coupled receptor 35	GPR35	SwissTargetPrediction
		Death-associated protein kinase 1	DAPK1	SwissTargetPrediction
		Tyrosine-protein kinase	CSK	SwissTargetPrediction
		Cyclin-dependent kinase 6	CDK6	SwissTargetPrediction
		Beta-secretase 1	BACE1	SwissTargetPrediction
		Tyrosine-protein kinase receptor UFO	AXL	SwissTargetPrediction
		Vasopressin V2 receptor	AVPR2	SwissTargetPrediction
		ALK tyrosine kinase receptor	ALK	SwissTargetPrediction
		Aldo-keto reductase family 1 member B10	AKR1B10	SwissTargetPrediction
		Multidrug resistance-associated protein 1	ABCC1	SwissTargetPrediction
		P-glycoprotein 1	ABCB1	SwissTargetPrediction
		Telomerase reverse transcriptase	TERT	SwissTargetPrediction
		Poly [ADP-ribose] polymerase 1	PARP1	SwissTargetPrediction
		NUAK family SNF1-like kinase 1	NUAK1	SwissTargetPrediction
		Histo-blood group ABO system transferase	ABO	PharmMapper
		Acetyl-CoA acetyltransferase, mitochondrial	ACAT1	PharmMapper
		Angiotensin-converting enzyme	ACE	PharmMapper
		Disintegrin and metalloproteinase domain-containing protein 17	ADAM17	PharmMapper
		Alcohol dehydrogenase class-3	ADH5	PharmMapper
		Adenosine kinase	ADK	PharmMapper
		Serine--pyruvate aminotransferase	AGXT	PharmMapper
		Adenosylhomocysteinase	AHCY	PharmMapper
		Aldo-keto reductase family 1 member C1	AKR1C1	PharmMapper
		Aldo-keto reductase family 1 member C2	AKR1C2	PharmMapper
		Aldo-keto reductase family 1 member C3	AKR1C3	PharmMapper
		RAC-alpha serine/threonine-protein kinase	AKT1	PharmMapper
		RAC-beta serine/threonine-protein kinase	AKT2	PharmMapper
		Aldehyde dehydrogenase, mitochondrial	ALDH2	PharmMapper
		Fructose-bisphosphate aldolase A	ALDOA	PharmMapper
		S-adenosylmethionine decarboxylase proenzyme	AMD1	PharmMapper
		Pancreatic alpha-amylase	AMY2A	PharmMapper
		Angiogenin	ANG	PharmMapper
		Apoptotic protease-activating factor 1	APAF1	PharmMapper
		Adenine phosphoribosyltransferase	APRT	PharmMapper
		Arginase-1	ARG1	PharmMapper
		Arginase-2, mitochondrial	ARG2	PharmMapper
		Rho GTPase-activating protein 1	ARHGAP1	PharmMapper
		ADP-ribosylation factor-like protein 5A	ARL5A	PharmMapper
		Arylsulfatase A	ARSA	PharmMapper
		Copper transport protein ATOX1	ATOX1	PharmMapper
		Galactosylgalactosylxylosylprotein 3-beta-glucuronosyltransferase 1	B3GAT1	PharmMapper
		Branched-chain-amino-acid aminotransferase, mitochondrial	BCAT2	PharmMapper
		Cholinesterase	BCHE	PharmMapper
		Betaine--homocysteine S-methyltransferase 1	BHMT	PharmMapper
		Baculoviral IAP repeat-containing protein 7	BIRC7	PharmMapper
		Bone morphogenetic protein 7	BMP7	PharmMapper
		Complement C1r subcomponent	C1R	PharmMapper
		Complement C1s subcomponent	C1S	PharmMapper
		Carbonic anhydrase 1	CA1	PharmMapper
		Carbonic anhydrase 2	CA2	PharmMapper
		Caspase-1	CASP1	PharmMapper
		Caspase-3	CASP3	PharmMapper
		Caspase-7	CASP7	PharmMapper
		Carbonyl reductase [NADPH] 1	CBR1	PharmMapper
		Cystathionine beta-synthase	CBS	PharmMapper
		C-C motif chemokine 5	CCL5	PharmMapper
		Cyclin-T1	CCNT1	PharmMapper
		T-cell surface glycoprotein CD1a	CD1A	PharmMapper
		CD209 antigen	CD209	PharmMapper
		Cytidine deaminase	CDA	PharmMapper
		Cell division control protein 42 homolog	CDC42	PharmMapper
		Cyclin-dependent kinase 5 activator 1	CDK5R1	PharmMapper
		Cell division protein kinase 7	CDK7	PharmMapper
		Liver carboxylesterase 1	CES1	PharmMapper
		Complement factor B	CFB	PharmMapper
		Complement factor D	CFD	PharmMapper
		Chitotriosidase-1	CHIT1	PharmMapper
		Dual specificity protein kinase CLK1	CLK1	PharmMapper
		Chymase	CMA1	PharmMapper
		Casein kinase I isoform gamma-2	CSNK1G2	PharmMapper
		Casein kinase II subunit alpha	CSNK2A1	PharmMapper
		Cathepsin B	CTSB	PharmMapper
		Cathepsin F	CTSF	PharmMapper
		Cathepsin G	CTSG	PharmMapper
		Cathepsin K	CTSK	PharmMapper
		Cathepsin S	CTSS	PharmMapper
		Cathepsin L2	CTSV	PharmMapper
		Cytochrome P450 2C9	CYP2C9	PharmMapper
		Deoxycytidine kinase	DCK	PharmMapper
		Probable ATP-dependent RNA helicase DDX6	DDX6	PharmMapper
		Dihydrofolate reductase	DHFR	PharmMapper
		Dipeptidase 1	DPEP1	PharmMapper
		Dipeptidyl peptidase 4	DPP4	PharmMapper
		Thymidylate kinase	DTYMK	PharmMapper
		Eukaryotic translation initiation factor 4E	EIF4E	PharmMapper
		Ephrin type-A receptor 2	EPHA2	PharmMapper
		Ephrin type-B receptor 4	EPHB4	PharmMapper
		Receptor tyrosine-protein kinase erbB-4	ERBB4	PharmMapper
		Estrogen-related receptor gamma	ESRRG	PharmMapper
		Coagulation factor X	F10	PharmMapper
		Coagulation factor XI	F11	PharmMapper
		Prothrombin	F2	PharmMapper
		Fatty acid-binding protein, heart	FABP3	PharmMapper
		Fatty acid-binding protein, adipocyte	FABP4	PharmMapper
		Gastrotropin	FABP6	PharmMapper
		Ferrochelatase, mitochondrial	FECH	PharmMapper
		Peptidyl-prolyl cis-trans isomerase FKBP1A	FKBP1A	PharmMapper
		Protein farnesyltransferase/geranylgeranyltransferase type-1 subunit alpha	FNTA	PharmMapper
		UDP-glucose 4-epimerase	GALE	PharmMapper
		Glucosylceramidase	GBA	PharmMapper
		Glucokinase	GCKR	PharmMapper
		Glycolipid transfer protein	GLTP	PharmMapper
		GMP reductase 1	GMPR	PharmMapper
		Glucosamine-6-phosphate isomerase	GNPDA2	PharmMapper
		Platelet glycoprotein Ib alpha chain	GP1BA	PharmMapper
		Glucose-6-phosphate isomerase	GPI	PharmMapper
		Glutathione reductase, mitochondrial	GSR	PharmMapper
		Glutathione S-transferase A1	GSTA1	PharmMapper
		Glutathione S-transferase A3	GSTA3	PharmMapper
		Glutathione S-transferase omega-1	GSTO1	PharmMapper
		Glutathione S-transferase theta-2	GSTT2	PharmMapper
		Hydroxyacyl-coenzyme A dehydrogenase, mitochondrial	HADH	PharmMapper
		Hydroxyacylglutathione hydrolase, mitochondrial	HAGH	PharmMapper
		Tyrosine-protein kinase HCK	HCK	PharmMapper
		Histone deacetylase 8	HDAC8	PharmMapper
		Beta-hexosaminidase subunit beta	HEXB	PharmMapper
		Histidine triad nucleotide-binding protein 1	HINT1	PharmMapper
		Hexokinase-1	HK1	PharmMapper
		3-hydroxy-3-methylglutaryl-coenzyme A reductase	HMGCR	PharmMapper
		Hypoxanthine-guanine phosphoribosyltransferase	HPRT1	PharmMapper
		GTPase HRas	HRAS	PharmMapper
		Corticosteroid 11-beta-dehydrogenase isozyme 1	HSD11B1	PharmMapper
		Heat shock protein HSP 90-alpha	HSP90AA1	PharmMapper
		Heat shock cognate 71 kDa protein	HSPA8	PharmMapper
		Insulin-like growth factor 1 receptor	IGF1R	PharmMapper
		Interferon-stimulated gene 20 kDa protein	ISG20	PharmMapper
		Tyrosine-protein kinase ITK/TSK	ITK	PharmMapper
		Tyrosine-protein kinase JAK2	JAK2	PharmMapper
		Tyrosine-protein kinase JAK3	JAK3	PharmMapper
		Kinesin-like protein KIF11	KIF11	PharmMapper
		Mast/stem cell growth factor receptor	KIT	PharmMapper
		Kynurenine--oxoglutarate transaminase 1	KYAT1	PharmMapper
		Neutrophil gelatinase-associated lipocalin	LCN2	PharmMapper
		L-lactate dehydrogenase B chain	LDHB	PharmMapper
		Galectin-2	LGALS2	PharmMapper
		Galectin-3	LGALS3	PharmMapper
		Galectin-7	LGALS7	PharmMapper
		Lanosterol synthase	LSS	PharmMapper
		Leukotriene A-4 hydrolase	LTA4H	PharmMapper
		Lysozyme C	LYZ	PharmMapper
		Endoplasmic reticulum mannosyl-oligosaccharide 1,2-alpha-mannosidase	MAN1B1	PharmMapper
		Mitogen-activated protein kinase 10	MAPK10	PharmMapper
		Mitogen-activated protein kinase 8	MAPK8	PharmMapper
		MAP kinase-activated protein kinase 2	MAPKAPK2	PharmMapper
		NAD-dependent malic enzyme, mitochondrial	ME2	PharmMapper
		Methionine aminopeptidase 2	METAP2	PharmMapper
		Macrophage migration inhibitory factor	MIF	PharmMapper
		Neprilysin	MME	PharmMapper
		Macrophage metalloelastase	MMP12	PharmMapper
		Collagenase 3	MMP13	PharmMapper
		Matrix metalloproteinase-16	MMP16	PharmMapper
		Matrilysin	MMP7	PharmMapper
		Neutrophil collagenase	MMP8	PharmMapper
		C-1-tetrahydrofolate synthase, cytoplasmic	MTHFD1	PharmMapper
		Nitric oxide synthase, endothelial	NOS3	PharmMapper
		Ribosyldihydronicotinamide dehydrogenase [quinone]	NQO2	PharmMapper
		Oxysterols receptor LXR-beta	NR1H2	PharmMapper
		Oxysterols receptor LXR-alpha	NR1H3	PharmMapper
		Bile acid receptor	NR1H4	PharmMapper
		Nuclear receptor subfamily 1 group I member 2	NR1I2	PharmMapper
		Ornithine aminotransferase, mitochondrial	OAT	PharmMapper
		Protein-arginine deiminase type-4	PADI4	PharmMapper
		Phenylalanine-4-hydroxylase	PAH	PharmMapper
		Serine/threonine-protein kinase PAK 6	PAK6	PharmMapper
		Phosphoenolpyruvate carboxykinase, cytosolic [GTP]	PCK1	PharmMapper
		Pyruvate dehydrogenase E1 component subunit beta, mitochondrial	PDHB	PharmMapper
		3-phosphoinositide-dependent protein kinase 1	PDPK1	PharmMapper
		Phosphatidylinositol 3-kinase regulatory subunit alpha	PIK3R1	PharmMapper
		Phosphatidylinositol transfer protein alpha isoform	PITPNA	PharmMapper
		Group 10 secretory phospholipase A2	PLA2G10	PharmMapper
		Phospholipase A2, membrane associated	PLA2G2A	PharmMapper
		Phenylethanolamine N-methyltransferase	PNMT	PharmMapper
		Purine nucleoside phosphorylase	PNP	PharmMapper
		Peroxisome proliferator-activated receptor alpha	PPARA	PharmMapper
		Peroxisome proliferator-activated receptor delta	PPARD	PharmMapper
		Peroxisome proliferator-activated receptor gamma	PPARG	PharmMapper
		Phosphopantothenoylcysteine decarboxylase	PPCDC	PharmMapper
		Peptidyl-prolyl cis-trans isomerase A	PPIA	PharmMapper
		cAMP-dependent protein kinase catalytic subunit alpha	PRKACA	PharmMapper
		Tyrosine-protein phosphatase non-receptor type 1	PTPN1	PharmMapper
		Glycogen phosphorylase, liver form	PYGL	PharmMapper
		Ras-related protein Rab-11A	RAB11A	PharmMapper
		Ras-related protein Rab-5A	RAB5A	PharmMapper
		Ras-related C3 botulinum toxin substrate 2	RAC2	PharmMapper
		GTP-binding nuclear protein Ran	RAN	PharmMapper
		Retinoic acid receptor alpha	RARA	PharmMapper
		Retinol-binding protein 4	RBP4	PharmMapper
		Lithostathine-1-alpha	REG1A	PharmMapper
		Renin	REN	PharmMapper
		Riboflavin kinase	RFK	PharmMapper
		GTP-binding protein Rheb	RHEB	PharmMapper
		Transforming protein RhoA	RHOA	PharmMapper
		Eosinophil cationic protein	RNASE3	PharmMapper
		Rho-related GTP-binding protein RhoE	RND3	PharmMapper
		Protein S100-A9	S100A9	PharmMapper
		P-selectin	SELP	PharmMapper
		Alpha-1-antitrypsin	SERPINA1	PharmMapper
		Histone-lysine N-methyltransferase SETD7	SETD7	PharmMapper
		Sex hormone-binding globulin	SHBG	PharmMapper
		Serine hydroxymethyltransferase, cytosolic	SHMT1	PharmMapper
		Superoxide dismutase [Mn], mitochondrial	SOD2	PharmMapper
		Sorbitol dehydrogenase	SORD	PharmMapper
		Proto-oncogene tyrosine-protein kinase Src	SRC	PharmMapper
		Spermidine synthase	SRM	PharmMapper
		Signal transducer and activator of transcription 1-alpha/beta	STAT1	PharmMapper
		Angiopoietin-1 receptor	TEK	PharmMapper
		Protein-glutamine gamma-glutamyltransferase E	TGM3	PharmMapper
		Thyroid hormone receptor alpha	THRA	PharmMapper
		Thyroid hormone receptor beta	THRB	PharmMapper
		Thymidine kinase, cytosolic	TK1	PharmMapper
		Activated CDC42 kinase 1	TNK2	PharmMapper
		Tryptophan 5-hydroxylase 1	TPH1	PharmMapper
		Triosephosphate isomerase	TPI1	PharmMapper
		Tryptase beta-2	TPSB2	PharmMapper
		Triggering receptor expressed on myeloid cells 1	TREM1	PharmMapper
		Thymidine phosphorylase	TYMP	PharmMapper
		Thymidylate synthase	TYMS	PharmMapper
		Uridine-cytidine kinase 2	UCK2	PharmMapper
		Vitamin D3 receptor	VDR	PharmMapper
		Tyrosine-protein kinase ZAP-70	ZAP70	PharmMapper
		Xanthine dehydrogenase/oxidase [Includes: Xanthine dehydrogenase	XDH	herb
		DNA topoisomerase 2-alpha	TOP2A	herb
		Transforming growth factor beta-1 proprotein [Cleaved into: Latency-associated peptide	TGFB1	herb
		Sulfotransferase 1E1	SULT1E1	herb
		Osteopontin	SPP1	herb
		Extracellular superoxide dismutase [Cu-Zn]	SOD3	herb
		Solute carrier family 2, facilitated glucose transporter member 4	SLC2A4	herb
		Plasminogen activator inhibitor 1	SERPINE1	herb
		Runt-related transcription factor 2	RUNX2	herb
		Protein CBFA2T1	RUNX1T1	herb
		Transcription factor p65	RELA	herb
		Ras association domain-containing protein 1	RASSF1	herb
		Ras GTPase-activating protein 1	RASA1	herb
		RAF proto-oncogene serine/threonine-protein kinase	RAF1	herb
		Phosphatidylinositol 3,4,5-trisphosphate 3-phosphatase and dual-specificity protein phosphatase PTEN	PTEN	herb
		26S proteasome non-ATPase regulatory subunit 3	PSMD3	herb
		Protein kinase C alpha type	PRKCA	herb
		DNA polymerase delta catalytic subunit	POLD1	herb
		Procollagen C-endopeptidase enhancer 1	PCOLCE	herb
		Nuclear receptor subfamily 1 group I member 3	NR1I3	herb
		GATOR complex protein NPRL3	NPRL3	herb
		Puromycin-sensitive aminopeptidase	NPEPPS	herb
		Homeobox protein Nkx-3.1	NKX3-1	herb
		NF-kappa-B inhibitor alpha	NFKBIA	herb
		Nuclear factor erythroid 2-related factor 2	NFE2L2	herb
		Neutrophil cytosol factor 1	NCF1	herb
		Myc proto-oncogene protein	MYC	herb
		Cytochrome c oxidase subunit 3	MT-CO3	herb
		Maltase-glucoamylase, intestinal [Includes: Maltase	MGAM	herb
		Mitogen-activated protein kinase 3	MAPK3	herb
		Interferon regulatory factor 1	IRF1	herb
		Interleukin-1 alpha	IL1A	herb
		Interleukin-10	IL10	herb
		Insulin-like growth factor-binding protein 3	IGFBP3	herb
		Insulin-like growth factor II	IGF2	herb
		Intercellular adhesion molecule 1	ICAM1	herb
		Heat shock protein beta-1	HSPB1	herb
		Endoplasmic reticulum chaperone BiP	HSPA5	herb
		Heat shock factor protein 1	HSF1	herb
		Hexokinase-2	HK2	herb
		Hypoxia-inducible factor 1-alpha	HIF1A	herb
		E3 ISG15--protein ligase HERC5	HERC5	herb
		Hyaluronan synthase 2	HAS2	herb
		Proto-oncogene c-Fos	FOS	herb
		Receptor tyrosine-protein kinase erbB-3	ERBB3	herb
		Receptor tyrosine-protein kinase erbB-2	ERBB2	herb
		ETS domain-containing protein Elk-1	ELK1	herb
		Eukaryotic translation initiation factor 6	EIF6	herb
		Transcription factor E2F2	E2F2	herb
		Transcription factor E2F1	E2F1	herb
		Dual oxidase 2	DUOX2	herb
		Type I iodothyronine deiodinase	DIO1	herb
		DDB1- and CUL4-associated factor 5	DCAF5	herb
		Cytochrome P450 1B1	CYP1B1	herb
		Interleukin-8	CXCL8	herb
		C-X-C motif chemokine 2	CXCL2	herb
		C-X-C motif chemokine 11	CXCL11	herb
		C-X-C motif chemokine 10	CXCL10	herb
		C-reactive protein	CRP	herb
		C-reactive protein [Cleaved into: C-reactive protein	CRP	herb
		Claudin-4	CLDN4	herb
		Inhibitor of nuclear factor kappa-B kinase subunit alpha	CHUK	herb
		Serine/threonine-protein kinase Chk2	CHEK2	herb
		Complement factor I	CFI	herb
		Cyclin-dependent kinase inhibitor 2A	CDKN2A	herb
		Cyclin-dependent kinase inhibitor 1	CDKN1A	herb
		Cyclin-dependent kinase 2	CDK2	herb
		Cyclin-dependent kinase 1	CDK1	herb
		CD40 ligand	CD40LG	herb
		G1/S-specific cyclin-D1	CCND1	herb
		G2/mitotic-specific cyclin-B1	CCNB1	herb
		Caveolin-1	CAV1	herb
		Caspase-9	CASP9	herb
		Caspase-8	CASP8	herb
		Voltage-dependent L-type calcium channel subunit alpha-1S	CACNA1S	herb
		Uncharacterized protein C1orf122	C1orf122	herb
		Baculoviral IAP repeat-containing protein 5	BIRC5	herb
		Bcl-2-like protein 1	BCL2L1	herb
		Apoptosis regulator BAX	BAX	herb
		B melanoma antigen 3	BAGE3	herb
		Anoctamin-5	ANO5	herb
		Activator of 90 kDa heat shock protein ATPase homolog 1	AHSA1	herb
		3-ketoacyl-CoA thiolase, mitochondrial	ACAA2	herb
		ATP-binding cassette sub-family G member 2	ABCG2	herb
		Broad substrate specificity ATP-binding cassette transporter ABCG2	ABCG2	herb

## Sheet: table S2
Gene name
NSS1
SSB.S
SSNA1
SSNA-1
NECAME_18147
ZNRD2
ZNRD2.S
CHRM1
CHRM3
CYP3A4
CYP2D6
FMO1
TLR7
TLR9
ABCB1
ALB
ORM1
ORM2
SLCO1A2
ACE2
CYP2C8
CHRM2
CYP2A6
CHRM4
SERPINA6
NR3C1
CYP2C19
CYP3A5
CYP3A43
CYP3A7
CYP1B1
CYP2B6
CYP2C9
HSD11B1
FBN1
TP53
ATM
PTEN
FAS
ALDH3A2
HSPG2
BRAF
CDH1
NLRP3
C11orf65
POLG
TNFRSF1A
COL1A1
SIL1
SLC12A3
LMNA
COL4A3
STAT3
IL10
COL1A2
FASLG
PRKAR1A
SPTAN1
TNF
PRKCD
INSR
AIRE
C3
INS
IFIH1
CD40LG
IL6
AKT1
CD46
COL11A2
PAX6
CRP
MEFV
FOXP3
INPP5K
CAV3
PNPLA6
EGFR
IL1B
SMAD3
B2M
SNRPN
MAPK1
HLA-B
CTSC
TWNK
IFNG
EZH2
THBD
HLA-DRB1
FLNB
TREX1
ADIPOQ
FRAXA
TTR
TRIM21
COL18A1
SHH
IGF1
MMP2
PPARG
CTLA4
GTF2IRD1
GTF2I
NOTCH2
VEGFA
H19
CD40
TLR4
CXCL8
ADAMTS13
TGFB1
GNAQ
POMC
AGK
APOH
PSMB8
ACE
FGF10
EDN1
CALR
APOE
SSB
TFAP2A
NDN
U2AF1
XIAP
CYP19A1
CCL2
F2
TAP2
STAT4
IL17A
ICAM1
SHBG
IL2
CXCR4
IL4
DNMT1
HLA-A
IL2RA
IL1RN
TNFSF13B
STAT1
HLA-DQB1
MIR21
RO60
C4A
NAGLU
TNFAIP3
C1S
ITGA3
PRL
STIM1
CD79A
CYP17A1
ELANE
NOS3
TAP1
ATP6V1B2
PRKACA
IL18
CASP8
CCR6
ALDH2
AICDA
ITPR1
CYP21A2
CRYAA
VWF
LONP1
MMP9
OXTR
EIF2AK3
RETN
FLT3
SMAD2
CD27
IFNA1
SLC12A2
MPO
KRT14
IL21R
IL1A
GJA8
APTX
MIR146A
GAD1
AQP5
SOCS1
GMPPB
ACSL4
F3
IRF5
CCL5
CD4
H2AC18
CRH
IKZF1
GZMB
IL23R
IL7R
COG4
PRTN3
LPL
HTT
MBL2
OCLN
MIR155
HLA-DQA1
PTPN22
LTF
ETV6
PLA2G6
IL1R1
GUSB
GPT
PUF60
SATB1
CA2
CASP3
CXCL13
PLAT
CALCA
TNFRSF1B
IL13
EGF
CD28
AGTR1
CFTR
CHUK
FN1
PIK3C2A
PON1
VCP
SNCA
PSMB9
BCL2
SELP
NGF
CD55
VDR
CSF2
HP
SELE
ISCA1
TPP1
PRKAR1B
IL12A
ETS1
IL7
NOS2
AMPH
CXCL10
CYP11A1
TG
ICOSLG
CCL3
AGO2
CXCL12
ABCA1
SYP
MYC
ITGB2
TLR2
HCRT
VCAM1
SPP1
BAX
ATP1A2
NPY
CCR1
TPO
CST3
HSPA5
MIF
CCR5
HLA-C
HIF1A
BGLAP
CENPB
TFRC
EDNRA
SACS
BMP6
CDKN3
NR3C2
FCGR3B
CXCR2
JUN
NFKB1
CLN3
FOXP2
IL5
NFKBIA
NCF1
CCL11
SERPINA3
AQP4
STAT2
CD8A
IRF1
PDCD1
CLU
GBA1
FURIN
PARP1
PCNA
LTA
VIP
ALDH3A1
S100B
TGM1
CASP1
TLR3
IL3
FADD
HMGB1
TNFRSF13B
ENO2
IFNAR1
CD36
SELL
GSTM1
SIRT1
COQ8A
CCL21
EDA
FXN
DNAJC3
STS
RFC1
RNF125
ADGRG1
IL15
LEF1
TSHR
NR4A2
SF3B2
FLG
CYCS
CD19
LCN2
NEFL
RNPC3
CD34
ELOVL4
SAR1B
SPTBN1
DAXX
ANXA5
FOS
MUC1
ITGAM
TAC1
ADAM17
SAA1
MME
MYD88
BCL6
IFNB1
IL2RB
EZR
HSP90AA1
BCL10
MSTO1
SRD5A1
HSPD1
KRT1
SPTBN2
GAPDH
GSTT1
MIR145
MIR200B
STAT5A
TBK1
IL12B
MUC5AC
BLK
TNFRSF13C
CD274
TARS1
ATP6AP1
SCT
DDHD2
CX3CR1
FST
TOP1
SIAE
S100A9
TRB
CLDN4
IRF3
HLA-DPB1
XRCC6
CCL4
MERTK
XDH
LIPC
C4B
TNFSF4
ITGAL
DNASE1
CLDN10
TJP1
SOD2
RNASE3
SFTPD
VIM
CD80
MIA2
TGFA
CCN2
CD59
ABCB6
FCGR3A
MBP
IRAK1
IRF8
OGDH
CD70
TNFRSF11B
AARS1
KIR3DL1
IL17F
SLC25A38
AQP2
MIR142
IFNG-AS1
CXCR3
FA2H
IRF7
XRCC5
CXCR2P1
SP1
NTRK1
ATF6
SPAST
NOS1
PPT1
MOG
TNFRSF10A
CR1
PF4
LINC00426
LINC02384
AGER
CXCR5
CXCL9
RBBP4
HSPB1
CYP1A1
CTSB
TTPA
NCAM1
ATP5F1A
CTDP1
TNFSF10
RELA
GFAP
GRP
HSPA4
SLC26A3
GOLGA1
LYZ
GC
F2R
PLA2G7
ADCYAP1
MIR200C
POLR2L
THBS1
TRAF6
CXCL1
PPBP
CTSD
RNY1
CR2
KRT7
MIR483
EXOSC10
MAPK8
DIABLO
MIR22
CHI3L1
IL33
AGBL5
CD44
MX1
MAG
IL23A
ALDH16A1
UBE4B
SLC39A8
ITGB1
AQP1
S100A8
MALT1
PTGS1
ARRB2
ALOX5
SLPI
CFLAR
MKI67
MUC5B
COL17A1
ITGA2
ALDH9A1
VIPR2
IL22
BCL2L1
CTSG
MIR31
KRT16
CCR7
CYP21A1P
BANK1
TNIP1
MUC16
ALPP
ACSL6
CAST
ADIPOR1
RNF213
KRT6B
LGALS3
AGMO
RORA
CD86
IRF4
FAM167A
CASP9
MUC4
MUC19
FBL
ELAVL4
MIRLET7D
HLA-DRB5
ACP5
ADRA2C
ABCA7
TXN
GAL
AXL
LAMB1
IAPP
TNFRSF6B
HACL1
PAX5
KCNC3
MASP2
GZMA
ADIPOR2
FUCA1
CENPC
TNFSF12
HSPA8
KIR2DS4
CX3CL1
GOLGA4
IL37
TGM2
CLDN3
MICB
TNPO3
NFATC1
AMBP
ALDH4A1
SEPSECS
RECK
XBP1
TLR1
IL17RA
NCL
HYOU1
CKAP4
ATP6V1B1
CCL17
IL21
MIR30A
IL1RL2
MYB
NFKBIL1
ALDH3B1
TIAM1
GAS6
DEFB1
TCP1
MIR125B1
PHB1
SDC1
LCN1
SOCS3
SLC1A2
BEAN1
ACSL3
IL1RL1
HLA-DRB3
OAS1
ITPR3
ALDH1B1
HNRNPH1
KLRK1
ITGA4
HMGA1
CEACAM5
APOA2
PADI4
AQP3
SERPINH1
ICAM3
LIN28B
GBA2
CD244
CTSH
IFI16
TMCO4
KIR2DL1
C4BPB
DEFB4A
H4C16
PDE5A
DDIT3
TRAPPC10
PRKAR2A
PDP1
CD2
PLA2G10
CD58
ICA1
ITGAX
MUC7
IL9
SERPING1
MSMB
RAB3D
FCRL4
IL12RB2
IGKC
ARMC8
EDA2R
PRKAR2B
ALDH1L2
DDX39B
HAVCR2
HCP5
VARS2
P4HTM
CA6
F2RL1
TNFSF13
ITPR2
CCN1
GRAP
APCS
LOC106627981
S100A6
BST2
CASP2
CYP4F22
MIR130A
EPX
SNRNP70
PRLR
MICA
SPDEF
CHRNA3
CRISP3
CXCL11
GADD45A
TRIM68
MIR125B2
TLR8
TFF3
NCR3
CXCL16
KLHL12
TNFRSF18
MAP2K4
NRON
SUMO4
IVL
AIM2
GNL3
CCL18
REG1A
RPLP0
BAK1
APAF1
ARHGAP45
CLEC7A
RPS6KA5
LILRA3
CARD16
EDC4
AREG
TPMT
PRKAB1
RSAD2
ASCL2
CD247
TYRO3
ARR3
RBMS3
ENHO
GRIN3B
TRIM27
LGALS1
PIP
GIT2
TRIM38
HMCN1
IL18BP
PRSS2
GOLGB1
CD1D
TSLP
IL36A
TIGIT
UBE2D1
P2RX7
MNDA
BLVRB
CA1
CTSS
MS4A1
LIN28A
IL27
TNFRSF17
IRF9
LAMP3
CD276
ALDH1A1
IGHM
CSN1S1
IGSF10
ACSL1
BST1
TNRC6A
IL1F10
PTN
MIR151A
LTB
RCC1
MIR1207
IGHG1
MIR4695
CCL3L1
C4BPA
AKNA
DUSP19
PIM1
CCR9
ACTN1
TNFSF18
NT5C1A
LSM2
CD226
GPI
MIRLET7A1
KIR2DL3
CCL20
F11R
CCL27
CD200
EEA1
PKM
CCL22
UBE2D2
ACSL5
STATH
S1PR1
CD6
DEFB103B
BLZF1
DLAT
EPSTI1
IL34
ID3
LACRT
IQGAP2
PRRC2A
FPR2
CPQ
H2BC12L
TBCC
DEFA1
PEBP1
PRDM1
MIR181D
LTBR
CXCR6
GTF2I-AS1
CDKL2
P2RY2
NR6A1
TRBV16
IGK
HTN1
DPP7
FBLN7
FABP5
PSMB1
RPL7
MIR6891
HTN3
CD72
WFDC2
TPI1
TRAF3IP2
RPLP1
TSIX
MIR3202-2
MIR3202-1
THM
MDK
DNAJC10
CD22
TRIM63
VTCN1
CASP8AP2
SPHK1
POU2F1
KIR3DS1
GOLGA3
IL25
CAPN1
TSSK1B
ALDH8A1
MIR744
PMVK
MATN1
IL22RA1
KIR2DS5
CD180
SEPTIN7
ANXA11
KIR2DS1
CCL23
MCAM
KIR2DS3
ITGA1
TXLNA
UBE2E1
C1QTNF3
KIR2DL2
EBF1
MIR5100
MIR5572
MIR5571
MIR4524B
RAB11FIP5
CCL28
KIR2DS2
COIL
FOXN2
SPRR2A
IGHV3-71
PIGR
IFN1@
BIRC7
BPIFA1
LPO
PSME3
TLR10
TRBV20OR9-2
CCR8
PSME1
ALDH6A1
CYP4F2
KTN1
MARCO
GALNT13
FSTL1
C1orf68
CHIA
MIR22HG
KCNH3
BTLA
PLA1A
EBI3
RPLP2
ABHD6
ACR
ACTB
ADAM10
ADD2
AFF1
AHSA1
AIMP2
AKR1C4
ANP32B
ANXA2
ANXA6
APOL1
APOM
AR
ATF3
ATG12
ATG5
BCHE
BCR
BDH2
BECN1
BGN
BRD4
BTG3
BTK
C1QL1
C1R
C2
CAMK4
CAMP
CASP6
CASR
CAT
CBL
CD14
CD38
CD69
CD8B
CDH13
CDK1
CDKN1A
CDR1
CENPV
CFH
CFHR1
CIITA
CORO1A
COX8A
CPD
CREBBP
CREM
CRK
CSF1
CSF3R
CTBP2
CTHRC1
CTNNB1
CXADR
CYBB
DECR1
DGAT1
DKK1
DNER
DNMT3A
DNMT3B
DUOX1
DUOX2
DUSP4
E2F1
EFNA2
EGR2
EIF4EBP1
ELF1
EMB
ENTPD1
EPHB2
EPHX2
EPO
ERBB2
ERN1
ERVW-1
ESR1
F10
F12
F5
FCER1G
FCGR2A
FCGR2B
FCN2
FLI1
FLII
FOSB
GATA3
GEM
GFI1
GORASP1
GRAP2
GRIN2A
GRN
GSTP1
HAMP
HDAC6
HDAC9
HGF
HMGN2
HSP90B1
ICOS
IER3
IFI27
IFI6
IFNA13
IFNAR2
IGHG3
IL16
IL3RA
IRAK4
IRF6
ISG20
ITGAE
JUNB
JUND
KDM6B
KIF5A
KLK3
KLK4
KRT20
LARP6
LBH
LBR
LCT
LDLR
LEP
LGALS9
LRRK2
LY6E
MAP2K1
MAPK14
MASP1
MBD2
MBTPS1
MCL1
MECP2
MFGE8
MMP11
MNAT1
MPL
MSH5
MTHFR
MTOR
NAT2
NCF2
NEDD9
NF1
NHS
NOTCH1
NR0B2
NR1I3
NT5E
OASL
OCA2
ORMDL3
PADI2
PBX1
PC
PDCD4
PDE7A
PDE8A
PGK1
PHGDH
PHRF1
PIK3CA
PIK3CB
PIK3CD
PIK3CG
PLA2R1
PNP
PPARD
PRKCA
PRKCB
PROC
PROCR
PSMD9
PTGS2
PTPN11
PTPN6
PTPRC
PTX3
RAB4A
RBM45
RELB
REN
RIPK4
RNF19A
ROCK2
RPA1
RPL17
RPS19
RPS6
RSPO1
RUNX1T1
SDC2
SERPINA1
SERPINB3
SERPINC1
SH2D1A
SH3BP2
SIGLEC1
SLAMF1
SLC12A9
SLC38A1
SLC4A1
SNRPA
SNRPB
SPG7
SPHK2
SRI
SRSF1
SUV39H1
SYK
SYNPO
SYT1
TAGLN2
TBX21
TGFB3
TIMP3
TNFRSF9
TNFSF15
TNFSF9
TRAF2
TREM1
TRPC6
TRPM2
TSC22D3
TSPO
TYK2
UBASH3B
WNK1
XPR1
ZEB1
ZNF423
CXADRP1
DCTN6
H3C14
H3P23
LAG3
MRC1
POLDIP2
PRRT2
SCYL1
TMED7
TRIM13
ZEB2
YY1AP1
YRDC
WNT4
WLS
WIPF1
WDR26
WDPCP
VANGL1
USH2A
TTC7A
TPRKB
TGFB2
TET3
TCHH
TBX15
TBCE
SYT2
SUCLG1
STAMBP
ST3GAL5
SPRTN
SPRED2
SPEN
SOS1
SLC9A1
SLC5A7
SLC2A1
SLC25A24
SLC19A2
SKI
SDCCAG8
SCNM1
SCN1A
RYR2
RNU4ATAC
RNF2
RIT1
RFX5
RC3H1
RBM8A
RAB3GAP2
RAB3GAP1
PTCH2
PSMB4
PRG4
PREPL
PPP1CB
POU3F3
POLR1B
POGZ
PLOD1
PKP1
PIGV
PIGF
PER3
PADI3
ORC4
ORC1
ODC1
NUP133
NRXN1
NRAS
NPHS2
NPHP4
NPHP1
NOS1AP
NLRC4
NFU1
NECTIN4
NBAS
MYSM1
MYCN
MTX2
MSH6
MSH2
MPZ
MPV17
MDS2
MDM4
LYST
LRP2
LRIG2
LORICRIN
LMOD1
KYNU
KIRREL1
KIF14
KCNN3
KCNJ10
KCNH1
KCND3
IL6R
IFT172
IBA57
HS2ST1
HOXD13
HHAT
HADHA
HAAO
H3-3A
GRHL3
GPSM2
GPR161
GNB1
GNAI3
GLI2
GGPS1
GATAD2B
FSHR
FLG2
ESPN
EPCAM
EN1
EIF2AK2
DVL1
DPYSL5
DGUOK
DDX59
DDR2
DCTN1
DCAF17
COLEC11
COL9A2
COL11A1
CNNM4
CLCNKB
CLCNKA
CKAP2L
CHRNA1
CHN1
CHD5
CFHR3
CEP104
CENPF
CELA2A
CDCA7
CDC73
CDC42
CCDC88A
CCDC28B
CALM2
BSND
BOLA3
BCL11A
BBS5
B3GALT6
ATP13A2
ATAD3A
ASXL2
ARID1A
ANTXR1
ANAPC1
ALMS1
ALG14
AKT3
AHDC1
AGRN
AFF3
ADAR
ACTG2
FGFR2
ANCR
CECR
DCR
DGCR
WBSCR2
DGCR6L
SMCR2
GALNS
DSCR4
CECR3
CECR9
CECR7
DGCR11
WHSC1L2P
HPRT1
VPS26C
PISRT1
SMCR5
XK
SMCR8
DGCR5
IPW
TMEM121B
CEP290
ZMPSTE24
MIEF2
RNASEH2C
SBDSP1
DSCR9
TMEM270
RIPPLY3
USHBP1
RCCIL
GTSCR1
MIEF1
METTL27
ANOS1
TCTN2
WASL
DSCR10
EVC2
HYLS1
DGCR6
HDHD5
HPS3
BCS1L
EVC
BBS12
OCRL
CRLF1
TBL2
AMMECR1
SAMHD1
ARVCF
DSCR8
NPHP3
FRAS1
SUGCT
ATRX
ESS2
SPART
CECR2
BBS10
NSUN5P1
GALNT17
NIPA1
GTF2H5
MKS1
TKT
MID1
PCNT
IDS
BUD23
CC2D2A
USH1G
HPS5
DSCAM
PANK2
HPS6
KCBQ1
USH1C
NIPA2
SBDS
SPG21
BAZ1B
DGCR2
ALG3
DSCAML1
TCOF1
BBS9
ELN
ADA2
TRPS1
NSD3
CLCF1
BBS7
HPS4
WRN
NSUN5P2
SCNN1B
WAS
EBP
OFD1
BLOC1S3
PYGM
HPS1
ERCC5
BBS2
PEX2
WFS1
NSD2
SCN5A
UBE3A
TWIST1
BBS1
PRNP
CYLD
MKKS
RPGRIP1L
ERCC6
GLRA1
BBS4
BLM
FGFR1
CC2D1A

## Sheet: table S3
Gene name
CHRM1
CHRM3
CYP3A4
ABCB1
CHRM2
NR3C1
CYP1B1
CYP2C9
HSD11B1
TP53
PTEN
IL10
TNF
INSR
CD40LG
IL6
AKT1
CRP
EGFR
IL1B
MAPK1
IFNG
THBD
TTR
MMP2
PPARG
VEGFA
CXCL8
TGFB1
ACE
CCL2
F2
ICAM1
SHBG
IL2
STAT1
C1S
NOS3
PRKACA
CASP8
ALDH2
MMP9
MPO
IL1A
F3
CCL5
CA2
CASP3
PLAT
EGF
CHUK
PON1
BCL2
SELP
VDR
SELE
NOS2
CXCL10
MYC
VCAM1
SPP1
BAX
HSPA5
MIF
HIF1A
NR3C2
JUN
NFKBIA
NCF1
IRF1
PARP1
CASP1
GSTM1
LCN2
FOS
ADAM17
MME
HSP90AA1
TOP1
S100A9
CLDN4
XDH
SOD2
RNASE3
HSPB1
CYP1A1
CTSB
RELA
LYZ
CTSD
MAPK8
PTGS1
BCL2L1
CTSG
LGALS3
CASP9
AXL
HSPA8
PADI4
PLA2G10
CXCL11
REG1A
APAF1
CA1
CTSS
PIM1
GPI
TPI1
BIRC7
AHSA1
AR
BCHE
C1R
CDK1
CDKN1A
DUOX2
E2F1
ERBB2
ESR1
F10
GSTP1
ISG20
MAPK14
NR1I3
PNP
PPARD
PRKCA
PRKCB
PTGS2
REN
RUNX1T1
SERPINA1
SYK
TREM1
ODC1
CDC42
HPRT1
SCN5A

## Sheet: table S4
Betweenness	Closeness	Degree	name	selected	shared name		Degree	name		Closeness	name		Betweenness	name
1766.09	0.0715631	26	TNF	FALSE	TNF		34	TP53		0.0715631	TNF		1766.09	TNF
1528.99	0.0715182	24	JUN	FALSE	JUN		26	TNF		0.0715182	JUN		1528.99	JUN
1528.72	0.0709396	34	TP53	FALSE	TP53		24	JUN		0.0712055	AKT1		1528.72	TP53
1217.8	0.0691748	11	MMP9	FALSE	MMP9		24	AKT1		0.071161	IL6		1217.8	MMP9
1129.2	0.071161	23	IL6	FALSE	IL6		23	IL6		0.0709396	TP53		1129.2	IL6
1054.45	0.0712055	24	AKT1	FALSE	AKT1		20	BCL2		0.0708075	MAPK1		1054.45	AKT1
800.756	0.0683044	6	GSTP1	FALSE	GSTP1		20	HSP90AA1		0.070632	CASP3		800.756	GSTP1
799.696	0.0701107	9	PTGS2	FALSE	PTGS2		19	IL1B		0.0705882	IL1B		799.696	PTGS2
639.572	0.0701538	20	BCL2	FALSE	BCL2		17	MAPK1		0.0705446	MAPK8		639.572	BCL2
620.633	0.0680191	3	CRP	FALSE	CRP		17	ESR1		0.0702836	RELA		620.633	CRP
597.524	0.0688822	5	NR3C1	FALSE	NR3C1
506.973	0.0690073	8	NCF1	FALSE	NCF1
453.365	0.0705446	13	MAPK8	FALSE	MAPK8
451.632	0.070632	15	CASP3	FALSE	CASP3
442.871	0.0645527	4	F2	FALSE	F2
439.835	0.070197	15	EGFR	FALSE	EGFR
408.246	0.0695122	20	HSP90AA1	FALSE	HSP90AA1
400	0.0650685	2	NR3C2	FALSE	NR3C2
388.444	0.0705882	19	IL1B	FALSE	IL1B
380.221	0.0663562	5	MPO	FALSE	MPO
377.529	0.0708075	17	MAPK1	FALSE	MAPK1
344.502	0.0654045	5	SELP	FALSE	SELP
315.207	0.0693431	10	TGFB1	FALSE	TGFB1
312.92	0.0652174	6	CYP3A4	FALSE	CYP3A4
312.478	0.0699387	13	BCL2L1	FALSE	BCL2L1
310.568	0.0684274	7	VCAM1	FALSE	VCAM1
299.09	0.0683863	9	ICAM1	FALSE	ICAM1
250.463	0.0702836	16	RELA	FALSE	RELA
248.002	0.0669014	6	CYP2C9	FALSE	CYP2C9
245.42	0.0683863	9	PRKACA	FALSE	PRKACA
221.458	0.0621592	5	F3	FALSE	F3
213.354	0.067217	5	CTSS	FALSE	CTSS
202	0.0615883	2	REN	FALSE	REN
157.803	0.0697674	15	CXCL8	FALSE	CXCL8
153.714	0.0693853	13	FOS	FALSE	FOS
153.649	0.0657819	2	SPP1	FALSE	SPP1
144.194	0.0696822	10	CASP8	FALSE	CASP8
140.58	0.0696396	17	ESR1	FALSE	ESR1
117.42	0.0652174	6	CYP1A1	FALSE	CYP1A1
114.82	0.0682635	6	PRKCB	FALSE	PRKCB
114.318	0.0643704	5	GSTM1	FALSE	GSTM1
112.683	0.0681411	5	EGF	FALSE	EGF
107.287	0.0698529	10	STAT1	FALSE	STAT1
101.957	0.0687575	9	IL2	FALSE	IL2
101.165	0.0679785	4	CD40LG	FALSE	CD40LG
86.9643	0.0685921	8	HSPA8	FALSE	HSPA8
75.436	0.0697674	9	NFKBIA	FALSE	NFKBIA
75.396	0.0685921	14	IFNG	FALSE	IFNG
74.032	0.0695122	13	CCL2	FALSE	CCL2
70.3201	0.0655926	3	CTSG	FALSE	CTSG
66.4609	0.0695122	12	MYC	FALSE	MYC
65.7493	0.0697674	8	CHUK	FALSE	CHUK
60.6569	0.0681818	5	CASP1	FALSE	CASP1
56.6711	0.0670194	5	MMP2	FALSE	MMP2
55.3004	0.0692168	12	CCL5	FALSE	CCL5
54.6006	0.0688406	9	CASP9	FALSE	CASP9
35.7963	0.0692588	12	IL1A	FALSE	IL1A
29.2508	0.0613893	3	THBD	FALSE	THBD
26.3455	0.0690491	9	MAPK14	FALSE	MAPK14
23.713	0.0677362	3	NOS2	FALSE	NOS2
23.2553	0.0676157	5	BAX	FALSE	BAX
21.8401	0.0681411	11	CXCL10	FALSE	CXCL10
21.6385	0.0685508	6	PRKCA	FALSE	PRKCA
20.643	0.0683863	7	CDKN1A	FALSE	CDKN1A
17.12	0.0673361	5	CTSB	FALSE	CTSB
16.8365	0.0685921	3	PPARG	FALSE	PPARG
14.3349	0.0694698	10	HIF1A	FALSE	HIF1A
13.7032	0.0682635	5	ERBB2	FALSE	ERBB2
12.9198	0.0649203	3	CYP1B1	FALSE	CYP1B1
12.204	0.0681818	5	PARP1	FALSE	PARP1
12.1385	0.0686334	8	APAF1	FALSE	APAF1
10.7805	0.0683863	11	IL10	FALSE	IL10
8.83433	0.0683863	6	PTEN	FALSE	PTEN
7.86974	0.067217	4	AR	FALSE	AR
7.39258	0.0678976	5	CDC42	FALSE	CDC42
7.37168	0.0673361	5	CDK1	FALSE	CDK1
5.3842	0.067696	3	NOS3	FALSE	NOS3
3.3284	0.0669014	4	CXCL11	FALSE	CXCL11
3.08443	0.0677765	3	IRF1	FALSE	IRF1
2.73404	0.0681818	5	HSPB1	FALSE	HSPB1
2.60794	0.0651801	2	INSR	FALSE	INSR
2	0.00884956	2	CHRM1	FALSE	CHRM1
1.9	0.0673759	2	LGALS3	FALSE	LGALS3
1.3896	0.0675355	3	HSPA5	FALSE	HSPA5
0.4	0.0668622	4	E2F1	FALSE	E2F1
0	0.0667838	4	CTSD	FALSE	CTSD
0	0.0649943	3	SELE	FALSE	SELE
0	0.0667838	2	TOP1	FALSE	TOP1
0	0.0665111	2	BIRC7	FALSE	BIRC7
0	0.0663562	2	PTGS1	FALSE	PTGS1
0	0.0657819	2	AHSA1	FALSE	AHSA1
0	0.0652174	2	COL18A1	FALSE	COL18A1
0	0.0652174	2	LCN2	FALSE	LCN2
0	0.0627063	2	RNASE3	FALSE	RNASE3
0	0.0617217	2	HSD11B1	FALSE	HSD11B1
0	0.0613563	2	F10	FALSE	F10
0	0.0589452	2	PLAT	FALSE	PLAT
0	0.00884956	2	HPRT1	FALSE	HPRT1
0	0.00884956	2	XDH	FALSE	XDH
0	0.00884956	2	PNP	FALSE	PNP
0	0.0672963	1	ADAM17	FALSE	ADAM17
0	0.0660104	1	PLA2G10	FALSE	PLA2G10
0	0.0650314	1	DUOX2	FALSE	DUOX2
0	0.0644796	1	SCN5A	FALSE	SCN5A
0	0.0626718	1	LYZ	FALSE	LYZ
0	0.0616549	1	NR1I3	FALSE	NR1I3
0	0.0584016	1	ACE	FALSE	ACE
0	0.00884887	1	CHRM3	FALSE	CHRM3
0	0.00884887	1	CHRM2	FALSE	CHRM2
0	0.00877193	1	C1R	FALSE	C1R
0	0.00877193	1	C1S	FALSE	C1S
0	0.00877193	1	GPI	FALSE	GPI
0	0.00877193	1	TPI1	FALSE	TPI1
0	0.00877193	1	SERPINA1	FALSE	SERPINA1
0	0.00877193	1	TTR	FALSE	TTR

## Sheet: table S5
ONTOLOGY	ID	Description	GeneRatio	BgRatio	RichFactor	FoldEnrichment	zScore	pvalue	p.adjust	qvalue	geneID	Count
BP	GO:0032496	response to lipopolysaccharide	41/137	348/18888	0.117816091954023	16.2431412031211	24.5323293536487	2.20858295541957e-38	8.63555935569053e-35	3.87315705655685e-35	IL10/TNF/IL6/AKT1/IL1B/MAPK1/THBD/CXCL8/ACE/CCL2/NOS3/CASP8/MMP9/MPO/IL1A/CASP3/CHUK/SELP/SELE/NOS2/CXCL10/VCAM1/MIF/NFKBIA/CASP1/FOS/ADAM17/S100A9/SOD2/CYP1A1/RELA/MAPK8/CTSG/CASP9/AXL/CXCL11/GSTP1/MAPK14/PRKCA/PTGS2/REN	41
BP	GO:0002237	response to molecule of bacterial origin	41/137	369/18888	0.111111111111111	15.3187347931873	23.7431654797758	2.53691106422691e-37	4.95966113056361e-34	2.22447043842212e-34	IL10/TNF/IL6/AKT1/IL1B/MAPK1/THBD/CXCL8/ACE/CCL2/NOS3/CASP8/MMP9/MPO/IL1A/CASP3/CHUK/SELP/SELE/NOS2/CXCL10/VCAM1/MIF/NFKBIA/CASP1/FOS/ADAM17/S100A9/SOD2/CYP1A1/RELA/MAPK8/CTSG/CASP9/AXL/CXCL11/GSTP1/MAPK14/PRKCA/PTGS2/REN	41
BP	GO:0009410	response to xenobiotic stimulus	34/137	444/18888	0.0765765765765766	10.557506411521	17.4195961857449	2.22826100093294e-25	2.9041668378826e-22	1.30255537808922e-22	CYP3A4/ABCB1/CYP1B1/CYP2C9/TP53/IL10/TNF/EGFR/IL1B/MMP2/ACE/STAT1/CASP3/CHUK/BCL2/NOS2/MYC/GSTM1/FOS/ADAM17/HSP90AA1/TOP1/SOD2/CYP1A1/RELA/BCHE/CDK1/CDKN1A/E2F1/GSTP1/PNP/PRKCB/PTGS2/REN	34
BP	GO:0071216	cellular response to biotic stimulus	28/137	265/18888	0.105660377358491	14.5672496901253	19.0116359701103	9.15577373175587e-25	8.94976882279137e-22	4.01408395713297e-22	TP53/IL10/TNF/IL6/AKT1/IL1B/MAPK1/CXCL8/CCL2/NOS3/MMP9/IL1A/NOS2/CXCL10/HSPA5/MIF/NFKBIA/CASP1/RELA/MAPK8/CTSG/AXL/CXCL11/APAF1/GSTP1/MAPK14/PRKCA/SYK	28
BP	GO:0000302	response to reactive oxygen species	24/137	203/18888	0.118226600985222	16.2997375139333	18.733330911785	1.78632966502166e-22	1.39690979804694e-19	6.26531625668651e-20	CYP1B1/IL6/AKT1/EGFR/MAPK1/MMP2/STAT1/NOS3/MMP9/MPO/IL1A/CASP3/CHUK/BCL2/HIF1A/JUN/NCF1/FOS/SOD2/RELA/MAPK8/AXL/CDK1/GSTP1	24
BP	GO:0031667	response to nutrient levels	32/137	490/18888	0.0653061224489796	9.00366453150603	15.3437377385658	9.28550048123185e-22	6.05105114693609e-19	2.71397259679513e-19	CYP1B1/TP53/TNF/AKT1/EGFR/MAPK1/PPARG/ACE/STAT1/MPO/IL1A/BCL2/VDR/CXCL10/VCAM1/SPP1/BAX/HSPA5/FOS/SOD2/CYP1A1/RELA/MAPK8/HSPA8/APAF1/PIM1/BCHE/CDKN1A/MAPK14/PPARD/PRKCB/PTGS2	32
BP	GO:0071222	cellular response to lipopolysaccharide	24/137	225/18888	0.106666666666667	14.7059854014599	17.6782940233244	2.14415400551677e-21	1.19766316593865e-18	5.3716700348736e-19	IL10/TNF/IL6/AKT1/IL1B/MAPK1/CXCL8/CCL2/NOS3/MMP9/IL1A/NOS2/CXCL10/MIF/NFKBIA/CASP1/RELA/MAPK8/CTSG/AXL/CXCL11/GSTP1/MAPK14/PRKCA	24
BP	GO:0006979	response to oxidative stress	29/137	398/18888	0.0728643216080402	10.0457029673917	15.5899585339271	4.75311494421746e-21	2.32308492898628e-18	1.04193282856135e-18	CYP1B1/TP53/IL6/AKT1/EGFR/MAPK1/MMP2/STAT1/NOS3/MMP9/MPO/IL1A/CASP3/CHUK/BCL2/HIF1A/JUN/NCF1/PARP1/FOS/SOD2/RELA/MAPK8/PTGS1/AXL/CDK1/DUOX2/GSTP1/PTGS2	29
BP	GO:0071219	cellular response to molecule of bacterial origin	24/137	238/18888	0.100840336134454	13.9027172912961	17.1222091980157	8.2245896511994e-21	3.57312728179885e-18	1.60259255659628e-18	IL10/TNF/IL6/AKT1/IL1B/MAPK1/CXCL8/CCL2/NOS3/MMP9/IL1A/NOS2/CXCL10/MIF/NFKBIA/CASP1/RELA/MAPK8/CTSG/AXL/CXCL11/GSTP1/MAPK14/PRKCA	24
BP	GO:0042060	wound healing	29/137	430/18888	0.0674418604651163	9.29811576981837	14.8782192157791	4.04600583395704e-20	1.5819882810772e-17	7.09541654670782e-18	PTEN/TNF/CD40LG/IL6/THBD/PPARG/VEGFA/TGFB1/F2/NOS3/IL1A/F3/PLAT/SELP/HIF1A/ADAM17/CLDN4/HSPB1/CTSG/AXL/CDKN1A/DUOX2/ERBB2/F10/MAPK14/PPARD/PRKCA/SERPINA1/SYK	29
BP	GO:0034612	response to tumor necrosis factor	24/137	263/18888	0.091254752851711	12.581166217979	16.1663	8.79233140697808e-20	3.12527416375312e-17	1.40172479655746e-17	CYP1B1/TP53/TNF/AKT1/MAPK1/CXCL8/CCL2/STAT1/CASP8/CCL5/CASP3/CHUK/SELE/VCAM1/NFKBIA/CASP1/FOS/ADAM17/RELA/BIRC7/GSTP1/MAPK14/PTGS2/SYK	24
BP	GO:1902893	regulation of miRNA transcription	16/137	75/18888	0.213333333333333	29.4119708029197	21.0732985761312	1.4204980515526e-19	4.62845615130889e-17	2.07592083674266e-17	NR3C1/TP53/IL10/TNF/EGFR/PPARG/VEGFA/TGFB1/MYC/HIF1A/JUN/FOS/RELA/AR/ESR1/PPARD	16
BP	GO:0048545	response to steroid hormone	26/137	338/18888	0.0769230769230769	10.6052779337451	15.2309111937827	1.67091775003094e-19	4.99480563699066e-17	2.24023319187682e-17	NR3C1/CYP1B1/IL10/TNF/IL6/EGFR/MAPK1/TGFB1/ACE/CASP3/BCL2/SPP1/NR3C2/PARP1/FOS/CLDN4/RELA/CASP9/HSPA8/GPI/AR/BCHE/CDKN1A/ESR1/PPARD/PTGS2	26
BP	GO:0061614	miRNA transcription	16/137	76/18888	0.210526315789474	29.0249711870918	20.9249313909191	1.78842145569998e-19	4.99480563699066e-17	2.24023319187682e-17	NR3C1/TP53/IL10/TNF/EGFR/PPARG/VEGFA/TGFB1/MYC/HIF1A/JUN/FOS/RELA/AR/ESR1/PPARD	16
BP	GO:0033002	muscle cell proliferation	23/137	251/18888	0.0916334661354582	12.6333788931864	15.8593099904747	5.00009015470139e-19	1.30335683365883e-16	5.84571943700527e-17	PTEN/IL10/TNF/IL6/AKT1/EGFR/IFNG/MMP2/PPARG/TGFB1/STAT1/NOS3/MMP9/CCL5/JUN/FOS/SOD2/PIM1/CDK1/CDKN1A/MAPK14/PPARD/PTGS2	23
BP	GO:2001233	regulation of apoptotic signaling pathway	27/137	396/18888	0.0681818181818182	9.40013271400133	14.4401383752259	7.01543265626216e-19	1.71439635537407e-16	7.68928342456103e-17	TP53/IL10/TNF/AKT1/IL1B/MMP2/ICAM1/NOS3/MMP9/IL1A/BCL2/MYC/BAX/MIF/HIF1A/PARP1/S100A9/SOD2/HSPB1/RELA/BCL2L1/LGALS3/APAF1/CTSS/AR/GSTP1/PTGS2	27
BP	GO:0050673	epithelial cell proliferation	29/137	482/18888	0.0601659751037344	8.29499954568858	13.867514743704	9.187330619253e-19	2.11308604242819e-16	9.47745684933468e-17	IL10/TNF/IL6/AKT1/EGFR/MAPK1/PPARG/VEGFA/TGFB1/CCL2/STAT1/F3/CCL5/EGF/VDR/MYC/BAX/HIF1A/ADAM17/XDH/BCL2L1/AR/CDKN1A/ERBB2/ESR1/PPARD/PRKCA/CDC42/SCN5A	29
BP	GO:2000628	regulation of miRNA metabolic process	16/137	90/18888	0.177777777777778	24.5099756690998	19.1094051639622	3.25636733252741e-18	7.07355348343455e-16	3.17257776373723e-16	NR3C1/TP53/IL10/TNF/EGFR/PPARG/VEGFA/TGFB1/MYC/HIF1A/JUN/FOS/RELA/AR/ESR1/PPARD	16
BP	GO:0062197	cellular response to chemical stress	24/137	311/18888	0.0771704180064309	10.6393785058793	14.6511257087792	4.40904589852415e-18	9.07335234906812e-16	4.06951272406717e-16	CYP1B1/TP53/IL6/AKT1/EGFR/MAPK1/MMP2/NOS3/MMP9/MPO/CASP3/CHUK/HIF1A/JUN/NCF1/PARP1/CASP1/FOS/SOD2/RELA/MAPK8/AXL/CDK1/PTGS2	24
BP	GO:0070661	leukocyte proliferation	25/137	352/18888	0.0710227272727273	9.79180491041805	14.2321633828571	6.05364229446442e-18	1.18348706856779e-15	5.30808845398828e-16	TP53/IL10/CD40LG/IL6/CRP/IL1B/MAPK1/ACE/IL2/IL1A/CCL5/CASP3/BCL2/VCAM1/BAX/MIF/IRF1/BCL2L1/LGALS3/CDKN1A/ERBB2/GSTP1/PNP/SYK/HPRT1	25
BP	GO:0070482	response to oxygen levels	25/137	354/18888	0.0706214689265537	9.73648397872077	14.1834960910242	6.92919289095534e-18	1.29014972398264e-15	5.78648388788551e-16	TP53/TNF/AKT1/MMP2/PPARG/VEGFA/TGFB1/ACE/IL1A/CASP3/PLAT/BCL2/NOS2/MYC/VCAM1/HIF1A/FOS/ADAM17/SOD2/CYP1A1/CASP9/APAF1/CDKN1A/PPARD/PTGS2	25
BP	GO:0050900	leukocyte migration	26/137	396/18888	0.0656565656565657	9.0519796505198	13.841650400857	8.51344994260819e-18	1.45628079483764e-15	6.53160264961504e-16	IL10/TNF/IL6/AKT1/IL1B/MAPK1/MMP2/VEGFA/CXCL8/CCL2/ICAM1/IL1A/CCL5/SELP/SELE/CXCL10/VCAM1/MIF/ADAM17/S100A9/CTSG/LGALS3/CXCL11/SYK/TREM1/CDC42	26
BP	GO:0071887	leukocyte apoptotic process	17/137	116/18888	0.146551724137931	20.2048829599799	17.7343364486901	8.566357616692e-18	1.45628079483764e-15	6.53160264961504e-16	TP53/IL10/IL6/AKT1/IL2/CCL5/CASP3/BCL2/BAX/MIF/HIF1A/ADAM17/BCL2L1/LGALS3/CASP9/AXL/BIRC7	17
BP	GO:0140747	regulation of ncRNA transcription	16/137	97/18888	0.164948453608247	22.7412	18.3495018799589	1.15301940404707e-17	1.87846077909335e-15	8.42513301378251e-16	NR3C1/TP53/IL10/TNF/EGFR/PPARG/VEGFA/TGFB1/MYC/HIF1A/JUN/FOS/RELA/AR/ESR1/PPARD	16
BP	GO:0036293	response to decreased oxygen levels	24/137	327/18888	0.073394495412844	10.1187972945825	14.2180589158853	1.40125033857159e-17	2.19155552952596e-15	9.82940237499059e-16	TP53/TNF/AKT1/MMP2/PPARG/VEGFA/TGFB1/ACE/IL1A/CASP3/PLAT/BCL2/NOS2/MYC/VCAM1/HIF1A/FOS/ADAM17/SOD2/CYP1A1/CASP9/APAF1/PPARD/PTGS2	24
BP	GO:0009636	response to toxic substance	22/137	260/18888	0.0846153846153846	11.6658057271196	14.8022176291903	1.72825570988794e-17	2.59903070217763e-15	1.1656979808394e-15	ABCB1/CYP1B1/TNF/NOS3/MPO/CCL5/CHUK/PON1/BCL2/BAX/GSTM1/FOS/S100A9/SOD2/CYP1A1/PTGS1/PIM1/CDK1/CDKN1A/DUOX2/GSTP1/PTGS2	22
BP	GO:0050878	regulation of body fluid levels	25/137	370/18888	0.0675675675675676	9.31544683369501	13.8076245731758	1.98135814179636e-17	2.86930012386066e-15	1.28691721802446e-15	CHRM1/CHRM3/CD40LG/IL6/EGFR/THBD/VEGFA/F2/NOS3/PRKACA/F3/PLAT/SELP/VDR/HIF1A/XDH/HSPB1/CTSG/AXL/GPI/F10/MAPK14/PRKCA/SERPINA1/SYK	25
BP	GO:0034614	cellular response to reactive oxygen species	18/137	151/18888	0.119205298013245	16.4346691158699	16.2766612753926	3.94731482901833e-17	5.51214320766488e-15	2.4722656034378e-15	CYP1B1/IL6/AKT1/EGFR/MAPK1/MMP2/NOS3/MMP9/MPO/CHUK/JUN/NCF1/FOS/SOD2/RELA/MAPK8/AXL/CDK1	18
BP	GO:0072593	reactive oxygen species metabolic process	21/137	238/18888	0.0882352941176471	12.1648776298841	14.8160551094209	4.19250502907171e-17	5.65265333230014e-15	2.53528616277077e-15	CYP1B1/TP53/TNF/CRP/EGFR/TGFB1/F2/NOS3/MPO/BCL2/NOS2/HIF1A/NCF1/XDH/SOD2/CYP1A1/CDKN1A/DUOX2/GSTP1/MAPK14/SYK	21
BP	GO:0071356	cellular response to tumor necrosis factor	21/137	241/18888	0.0871369294605809	12.0134476178938	14.7081104745505	5.42055699753342e-17	7.06479262011856e-15	3.16864840627743e-15	CYP1B1/TP53/TNF/AKT1/MAPK1/CXCL8/CCL2/STAT1/CASP8/CCL5/CHUK/VCAM1/NFKBIA/CASP1/FOS/ADAM17/RELA/BIRC7/GSTP1/MAPK14/SYK	21
BP	GO:0001666	response to hypoxia	23/137	313/18888	0.073482428115016	10.1309204542804	13.9236107547344	6.88114377830134e-17	8.45826138051782e-15	3.79363668325285e-15	TP53/TNF/MMP2/PPARG/VEGFA/TGFB1/ACE/IL1A/CASP3/PLAT/BCL2/NOS2/MYC/VCAM1/HIF1A/FOS/ADAM17/SOD2/CYP1A1/CASP9/APAF1/PPARD/PTGS2	23
BP	GO:0010586	miRNA metabolic process	16/137	108/18888	0.148148148148148	20.4249797242498	17.3043071330457	6.92236225515525e-17	8.45826138051782e-15	3.79363668325285e-15	NR3C1/TP53/IL10/TNF/EGFR/PPARG/VEGFA/TGFB1/MYC/HIF1A/JUN/FOS/RELA/AR/ESR1/PPARD	16
BP	GO:0032943	mononuclear cell proliferation	23/137	315/18888	0.073015873015873	10.0665971498088	13.8703724755776	7.91627591189883e-17	9.37958751985589e-15	4.20686305238388e-15	TP53/IL10/CD40LG/IL6/CRP/IL1B/ACE/IL2/IL1A/CCL5/CASP3/BCL2/VCAM1/BAX/MIF/IRF1/BCL2L1/LGALS3/CDKN1A/ERBB2/PNP/SYK/HPRT1	23
BP	GO:0034599	cellular response to oxidative stress	21/137	248/18888	0.0846774193548387	11.6743583706146	14.4635273955237	9.73742756976663e-17	1.11980417052316e-14	5.02246264124805e-15	CYP1B1/TP53/IL6/AKT1/EGFR/MAPK1/MMP2/NOS3/MMP9/MPO/CHUK/HIF1A/JUN/NCF1/PARP1/FOS/SOD2/RELA/MAPK8/AXL/CDK1	21
BP	GO:0097193	intrinsic apoptotic signaling pathway	23/137	319/18888	0.0721003134796238	9.94037022630025	13.7653146752198	1.04459282762264e-16	1.16695941600129e-14	5.23395985208816e-15	CYP1B1/TP53/IL10/TNF/AKT1/MMP2/MMP9/CASP3/BCL2/MYC/BAX/MIF/HIF1A/PARP1/S100A9/SOD2/HSPB1/BCL2L1/CASP9/APAF1/CDKN1A/E2F1/PTGS2	23
BP	GO:1902895	positive regulation of miRNA transcription	13/137	56/18888	0.232142857142857	32.0052137643379	19.8614100385076	1.246603077368e-16	1.35394945347469e-14	6.07263370437161e-15	NR3C1/TP53/IL10/TNF/EGFR/PPARG/TGFB1/MYC/HIF1A/JUN/FOS/RELA/AR	13
BP	GO:0001819	positive regulation of cytokine production	27/137	500/18888	0.054	7.44490510948905	12.4842897271527	2.53772486954143e-16	2.68175790267756e-14	1.20280217145264e-14	CYP1B1/IL10/TNF/CD40LG/IL6/IL1B/IFNG/TGFB1/IL2/STAT1/CASP8/IL1A/F3/CHUK/NOS2/MIF/HIF1A/IRF1/CASP1/ADAM17/HSP90AA1/HSPB1/RELA/MAPK14/PNP/PTGS2/SYK	27
BP	GO:0070663	regulation of leukocyte proliferation	21/137	267/18888	0.0786516853932584	10.8435987861888	13.8464228912033	4.36856521439275e-16	4.49502368112518e-14	2.01607469450923e-14	IL10/CD40LG/IL6/CRP/IL1B/MAPK1/IL2/IL1A/CCL5/CASP3/BCL2/VCAM1/MIF/IRF1/BCL2L1/LGALS3/CDKN1A/ERBB2/GSTP1/PNP/SYK	21
BP	GO:0048660	regulation of smooth muscle cell proliferation	18/137	174/18888	0.103448275862069	14.2622703246917	15.0223800264756	5.09565597623082e-16	5.10872176078526e-14	2.29132600712565e-14	PTEN/IL10/TNF/IL6/AKT1/EGFR/IFNG/MMP2/PPARG/TGFB1/STAT1/NOS3/MMP9/CCL5/JUN/SOD2/CDKN1A/PTGS2	18
BP	GO:0044703	multi-organism reproductive process	19/137	204/18888	0.0931372549019608	12.8407041648776	14.5340698083666	5.3435914953298e-16	5.22336068668488e-14	2.34274300821565e-14	AKT1/IL1B/THBD/MMP2/VEGFA/ACE/MMP9/BCL2/VDR/SPP1/PARP1/FOS/CLDN4/CYP1A1/CTSB/AR/ESR1/PPARD/PTGS2	19
BP	GO:0048659	smooth muscle cell proliferation	18/137	178/18888	0.101123595505618	13.941769867957	14.8284698030934	7.6490310569962e-16	7.29456376411101e-14	3.27170365621455e-14	PTEN/IL10/TNF/IL6/AKT1/EGFR/IFNG/MMP2/PPARG/TGFB1/STAT1/NOS3/MMP9/CCL5/JUN/SOD2/CDKN1A/PTGS2	18
BP	GO:2001234	negative regulation of apoptotic signaling pathway	20/137	244/18888	0.0819672131147541	11.3007059949743	13.8427353020809	1.04106717077507e-15	9.69183961364414e-14	4.34691204639417e-14	IL10/TNF/AKT1/IL1B/ICAM1/NOS3/MMP9/IL1A/BCL2/BAX/MIF/HIF1A/SOD2/HSPB1/RELA/BCL2L1/LGALS3/AR/GSTP1/PTGS2	20
BP	GO:0044706	multi-multicellular organism process	19/137	212/18888	0.089622641509434	12.3561492907313	14.213029187618	1.09399047564581e-15	9.9476808366863e-14	4.4616600548982e-14	AKT1/IL1B/THBD/MMP2/VEGFA/ACE/MMP9/BCL2/VDR/SPP1/PARP1/FOS/CLDN4/CYP1A1/CTSB/AR/ESR1/PPARD/PTGS2	19
BP	GO:0007565	female pregnancy	18/137	183/18888	0.0983606557377049	13.5608471939691	14.5947001830306	1.25312696106521e-15	1.11357418585567e-13	4.99452037592019e-14	AKT1/IL1B/THBD/MMP2/VEGFA/ACE/MMP9/BCL2/VDR/SPP1/PARP1/FOS/CLDN4/CTSB/AR/ESR1/PPARD/PTGS2	18
BP	GO:0010038	response to metal ion	23/137	360/18888	0.0638888888888889	8.80827250608272	12.7856113202608	1.455590676516e-15	1.26474656559501e-13	5.67254752532318e-14	AKT1/EGFR/MAPK1/CASP8/MMP9/IL1A/CASP3/CHUK/BCL2/VCAM1/HIF1A/JUN/NCF1/PARP1/FOS/SOD2/CYP1A1/MAPK8/CASP9/GPI/CDK1/PTGS2/SCN5A	23
BP	GO:2000630	positive regulation of miRNA metabolic process	13/137	67/18888	0.194029850746269	26.7506264298943	18.0481798190766	1.56451939358153e-15	1.3298414845443e-13	5.96450642953509e-14	NR3C1/TP53/IL10/TNF/EGFR/PPARG/TGFB1/MYC/HIF1A/JUN/FOS/RELA/AR	13
BP	GO:0022407	regulation of cell-cell adhesion	26/137	496/18888	0.0524193548387097	7.22698375323758	12.0125068561984	1.97707480662433e-15	1.61407791117997e-13	7.23934257645936e-14	IL10/TNF/CD40LG/IL6/AKT1/IL1B/IFNG/VEGFA/TGFB1/CCL2/IL2/IL1A/CCL5/CASP3/SELP/SELE/VCAM1/IRF1/RELA/CTSG/LGALS3/ERBB2/MAPK14/PNP/PRKCA/SYK	26
BP	GO:0050678	regulation of epithelial cell proliferation	24/137	407/18888	0.058968058968059	8.12984450940655	12.4292260504314	1.99405866595399e-15	1.61407791117997e-13	7.23934257645936e-14	IL10/TNF/AKT1/EGFR/PPARG/VEGFA/TGFB1/CCL2/STAT1/F3/CCL5/EGF/VDR/MYC/BAX/HIF1A/ADAM17/XDH/AR/ERBB2/PPARD/PRKCA/CDC42/SCN5A	24
BP	GO:0048771	tissue remodeling	18/137	188/18888	0.0957446808510638	13.2001863643423	14.3699131393336	2.02275748459894e-15	1.61407791117997e-13	7.23934257645936e-14	TP53/IL6/EGFR/MMP2/PPARG/TGFB1/ACE/IL2/NOS3/IL1A/VDR/SPP1/BAX/HIF1A/CYP1A1/AXL/PRKCA/SYK	18
BP	GO:0007584	response to nutrient	17/137	164/18888	0.103658536585366	14.2912586790101	14.612289741969	3.35450874901274e-15	2.62322584172796e-13	1.1765498054432e-13	CYP1B1/EGFR/PPARG/STAT1/IL1A/VDR/CXCL10/VCAM1/SPP1/SOD2/CYP1A1/RELA/APAF1/PIM1/BCHE/PRKCB/PTGS2	17
BP	GO:0007159	leukocyte cell-cell adhesion	24/137	419/18888	0.0572792362768496	7.89700886713238	12.2033	3.80923415200588e-15	2.92041284987117e-13	1.30984191893535e-13	IL10/TNF/CD40LG/IL6/AKT1/IL1B/IFNG/CCL2/ICAM1/IL2/IL1A/CCL5/CASP3/SELP/SELE/VCAM1/IRF1/S100A9/RELA/CTSG/LGALS3/ERBB2/PNP/SYK	24
BP	GO:0009314	response to radiation	24/137	431/18888	0.0556844547563805	7.6771385506461	11.9861035063116	7.12643384972503e-15	5.35853006777401e-13	2.40336817685059e-13	TP53/AKT1/EGFR/THBD/MMP2/MMP9/IL1A/CASP3/BCL2/CXCL10/MYC/VCAM1/BAX/HIF1A/PARP1/FOS/MME/SOD2/RELA/MAPK8/BCL2L1/CASP9/CDKN1A/MAPK14	24
BP	GO:0098781	ncRNA transcription	16/137	146/18888	0.10958904109589	15.1088891110889	14.6281982690698	9.37698562294328e-15	6.91773845013363e-13	3.102692760243e-13	NR3C1/TP53/IL10/TNF/EGFR/PPARG/VEGFA/TGFB1/MYC/HIF1A/JUN/FOS/RELA/AR/ESR1/PPARD	16
BP	GO:0032944	regulation of mononuclear cell proliferation	19/137	241/18888	0.0788381742738589	10.869309749523	13.180150588604	1.16406702592517e-14	8.42870753956928e-13	3.78038141362833e-13	IL10/CD40LG/IL6/CRP/IL1B/IL2/IL1A/CCL5/CASP3/BCL2/VCAM1/MIF/IRF1/BCL2L1/LGALS3/CDKN1A/ERBB2/PNP/SYK	19
BP	GO:0046686	response to cadmium ion	12/137	60/18888	0.2	27.5737226277372	17.6220116815712	1.35105336808172e-14	9.60476121672641e-13	4.30785628942421e-13	AKT1/EGFR/MAPK1/MMP9/CHUK/JUN/NCF1/FOS/SOD2/MAPK8/GPI/CDK1	12
BP	GO:0018105	peptidyl-serine phosphorylation	20/137	282/18888	0.0709219858156028	9.77791582543873	12.6945998118082	1.67501399777828e-14	1.16951870202019e-12	5.24543857198987e-13	PTEN/TNF/IL6/AKT1/EGFR/MAPK1/IFNG/VEGFA/PRKACA/CHUK/BCL2/BAX/MIF/TOP1/MAPK8/CDK1/MAPK14/PRKCA/PRKCB/PTGS2	20
BP	GO:0048732	gland development	24/137	449/18888	0.0534521158129176	7.36936907645538	11.6756336680959	1.75805800318347e-14	1.20596610393813e-12	5.40890975679345e-13	NR3C1/CYP1B1/IL10/TNF/INSR/IL6/AKT1/EGFR/MAPK1/MMP2/VEGFA/TGFB1/EGF/BCL2/VDR/BAX/HIF1A/XDH/SOD2/CYP1A1/RELA/AR/ESR1/CDC42	24
BP	GO:0009411	response to UV	16/137	154/18888	0.103896103896104	14.3240117546687	14.1908910720866	2.19568641154811e-14	1.48019549468157e-12	6.63886308827432e-13	TP53/AKT1/EGFR/MMP2/MMP9/CASP3/BCL2/MYC/BAX/PARP1/MME/RELA/MAPK8/CASP9/CDKN1A/MAPK14	16
BP	GO:0009615	response to virus	23/137	409/18888	0.0562347188264059	7.75300269484054	11.8018176788691	2.24070759693463e-14	1.48494350915498e-12	6.66015853076376e-13	CHRM2/TNF/IL6/IL1B/IFNG/STAT1/CCL5/CHUK/BCL2/CXCL10/BAX/HIF1A/IRF1/CASP1/HSP90AA1/HSPB1/RELA/BCL2L1/PLA2G10/DUOX2/ISG20/MAPK14/ODC1	23
BP	GO:0046209	nitric oxide metabolic process	13/137	84/18888	0.154761904761905	21.3368091762252	15.9671311389202	3.47733137773449e-14	2.26606094782364e-12	1.01635685531678e-12	CYP1B1/IL10/TNF/INSR/AKT1/IL1B/IFNG/NOS3/NOS2/HSP90AA1/SOD2/CYP1A1/PTGS2	13
BP	GO:0018209	peptidyl-serine modification	20/137	294/18888	0.0680272108843537	9.37881722031879	12.3765478527221	3.69254078766219e-14	2.36685811143593e-12	1.06156565181108e-12	PTEN/TNF/IL6/AKT1/EGFR/MAPK1/IFNG/VEGFA/PRKACA/CHUK/BCL2/BAX/MIF/TOP1/MAPK8/CDK1/MAPK14/PRKCA/PRKCB/PTGS2	20
BP	GO:0006935	chemotaxis	24/137	466/18888	0.0515021459227468	7.10052943203534	11.397816294592	3.97307363936344e-14	2.45434300434002e-12	1.10080372734701e-12	IL10/IL6/IL1B/MAPK1/MMP2/VEGFA/CXCL8/TGFB1/CCL2/F3/CCL5/CXCL10/VCAM1/MIF/ADAM17/S100A9/RNASE3/HSPB1/CTSG/LGALS3/CXCL11/MAPK14/SYK/TREM1	24
BP	GO:0043281	regulation of cysteine-type endopeptidase activity involved in apoptotic process	16/137	160/18888	0.1	13.7868613138686	13.8837825371663	4.02640540782431e-14	2.45434300434002e-12	1.10080372734701e-12	TNF/AKT1/PPARG/VEGFA/CASP8/MMP9/F3/MYC/BAX/CASP1/S100A9/XDH/CTSD/CASP9/APAF1/SYK	16
BP	GO:0006959	humoral immune response	19/137	258/18888	0.0736434108527132	10.153114921066	12.6532444260504	4.03137696422559e-14	2.45434300434002e-12	1.10080372734701e-12	TNF/IL6/IL1B/IFNG/CXCL8/CCL2/F2/C1S/BCL2/CXCL10/S100A9/RNASE3/LYZ/CTSG/CXCL11/REG1A/GPI/C1R/TREM1	19
BP	GO:2001057	reactive nitrogen species metabolic process	13/137	85/18888	0.152941176470588	21.0857878917991	15.8640590898677	4.08010985376219e-14	2.45434300434002e-12	1.10080372734701e-12	CYP1B1/IL10/TNF/INSR/AKT1/IL1B/IFNG/NOS3/NOS2/HSP90AA1/SOD2/CYP1A1/PTGS2	13
BP	GO:0042330	taxis	24/137	468/18888	0.0512820512820513	7.07018528916339	11.3660514686548	4.36316478919964e-14	2.58484459481373e-12	1.159335333143e-12	IL10/IL6/IL1B/MAPK1/MMP2/VEGFA/CXCL8/TGFB1/CCL2/F3/CCL5/CXCL10/VCAM1/MIF/ADAM17/S100A9/RNASE3/HSPB1/CTSG/LGALS3/CXCL11/MAPK14/SYK/TREM1	24
BP	GO:0050727	regulation of inflammatory response	23/137	425/18888	0.0541176470588235	7.4611249463289	11.5154529863396	5.04881654961512e-14	2.94639891179032e-12	1.32149699476179e-12	IL10/TNF/IL6/IL1B/IFNG/PPARG/TGFB1/IL2/MMP9/CCL5/SELE/NFKBIA/NCF1/CASP1/S100A9/RELA/PLA2G10/ESR1/GSTP1/MAPK14/PPARD/PTGS2/SYK	23
BP	GO:1903037	regulation of leukocyte cell-cell adhesion	22/137	382/18888	0.0575916230366492	7.94007719646884	11.7130301350757	5.36274023402761e-14	3.08357563456588e-12	1.38302248140712e-12	IL10/TNF/CD40LG/IL6/AKT1/IL1B/IFNG/CCL2/IL2/IL1A/CCL5/CASP3/SELP/SELE/VCAM1/IRF1/RELA/CTSG/LGALS3/ERBB2/PNP/SYK	22
BP	GO:2000106	regulation of leukocyte apoptotic process	13/137	89/18888	0.146067415730337	20.1381120314935	15.4687876890977	7.57686881090063e-14	4.29355899284369e-12	1.92571524621822e-12	TP53/IL10/IL2/CCL5/BCL2/BAX/MIF/HIF1A/ADAM17/BCL2L1/LGALS3/AXL/BIRC7	13
BP	GO:0046651	lymphocyte proliferation	20/137	308/18888	0.0649350649350649	8.95250734666793	12.0277983732362	8.87870441247313e-14	4.95939060753856e-12	2.22434910544064e-12	TP53/IL10/CD40LG/IL6/IL1B/IL2/IL1A/CCL5/CASP3/BCL2/VCAM1/BAX/MIF/IRF1/LGALS3/CDKN1A/ERBB2/PNP/SYK/HPRT1	20
BP	GO:2000379	positive regulation of reactive oxygen species metabolic process	12/137	70/18888	0.171428571428571	23.6346193952033	16.2167955288926	9.66038873703186e-14	5.3200168960274e-12	2.38609453460268e-12	CYP1B1/TP53/CRP/EGFR/TGFB1/F2/XDH/SOD2/CDKN1A/GSTP1/MAPK14/SYK	12
BP	GO:0030595	leukocyte chemotaxis	18/137	237/18888	0.0759493670886076	10.4710339092673	12.5415166863942	1.16320595910236e-13	6.31685458345867e-12	2.83318878342769e-12	IL10/IL6/IL1B/MAPK1/MMP2/VEGFA/CXCL8/CCL2/CCL5/CXCL10/MIF/ADAM17/S100A9/CTSG/LGALS3/CXCL11/SYK/TREM1	18
BP	GO:0043523	regulation of neuron apoptotic process	18/137	244/18888	0.0737704918032787	10.1706353954768	12.3240754947687	1.92004043511931e-13	1.02840521935843e-11	4.61252684197372e-12	NR3C1/TP53/IL10/TNF/MMP2/CCL2/CASP8/CASP3/BCL2/BAX/HIF1A/PARP1/SOD2/BCL2L1/CASP9/AXL/GPI/CDC42	18
BP	GO:0060326	cell chemotaxis	20/137	322/18888	0.062111801242236	8.5632678968128	11.7005911266874	2.04271164850849e-13	1.07932466833354e-11	4.8409069792534e-12	IL10/IL6/IL1B/MAPK1/MMP2/VEGFA/CXCL8/CCL2/CCL5/CXCL10/VCAM1/MIF/ADAM17/S100A9/HSPB1/CTSG/LGALS3/CXCL11/SYK/TREM1	20
BP	GO:2000377	regulation of reactive oxygen species metabolic process	15/137	149/18888	0.100671140939597	13.8793905844315	13.4910204121525	2.37485174585221e-13	1.23808937683762e-11	5.55298667872251e-12	CYP1B1/TP53/TNF/CRP/EGFR/TGFB1/F2/BCL2/HIF1A/XDH/SOD2/CDKN1A/GSTP1/MAPK14/SYK	15
BP	GO:0001890	placenta development	15/137	150/18888	0.1	13.7868613138686	13.4393270855289	2.62267981236179e-13	1.34929974557034e-11	6.05177917921709e-12	IL10/AKT1/EGFR/MAPK1/PPARG/CASP8/VDR/SPP1/HIF1A/PARP1/MME/CTSB/MAPK14/PPARD/PTGS2	15
BP	GO:0051222	positive regulation of protein transport	18/137	251/18888	0.0717131474103586	9.8869921772763	12.1152732251244	3.11917885265382e-13	1.58389471608785e-11	7.1039671476709e-12	CHRM1/CHRM3/TNF/EGFR/IL1B/IFNG/PPARG/TGFB1/F2/PRKACA/IL1A/HIF1A/HSP90AA1/CDK1/MAPK14/PRKCB/PTGS2/CDC42	18
BP	GO:0006809	nitric oxide biosynthetic process	12/137	77/18888	0.155844155844156	21.486017632003	15.3966600139612	3.1966386493194e-13	1.60241757933832e-11	7.18704452060206e-12	CYP1B1/IL10/TNF/INSR/AKT1/IL1B/IFNG/NOS3/NOS2/HSP90AA1/SOD2/PTGS2	12
BP	GO:0009612	response to mechanical stimulus	17/137	216/18888	0.0787037037037037	10.8507704785077	12.4460405968296	3.26910028970639e-13	1.61799773832303e-11	7.2569234945381e-12	TNF/EGFR/IL1B/MMP2/STAT1/CASP8/MPO/CXCL10/NFKBIA/IRF1/CASP1/FOS/RELA/MAPK8/GPI/MAPK14/PTGS2	17
BP	GO:1901654	response to ketone	17/137	217/18888	0.0783410138248848	10.8007669279155	12.4118264860906	3.52554336939885e-13	1.72310932179369e-11	7.72836217555063e-12	NR3C1/CYP1B1/AKT1/EGFR/TGFB1/ACE/SPP1/NCF1/PARP1/FOS/CLDN4/RELA/BCL2L1/CASP9/GPI/AR/CDKN1A	17
BP	GO:0051402	neuron apoptotic process	19/137	292/18888	0.0650684931506849	8.97090290970903	11.7332610425091	3.7436561506002e-13	1.80712290726504e-11	8.10517368018185e-12	NR3C1/TP53/IL10/TNF/MMP2/CCL2/CASP8/CASP3/BCL2/BAX/HIF1A/PARP1/SOD2/BCL2L1/CASP9/AXL/APAF1/GPI/CDC42	19
BP	GO:0071214	cellular response to abiotic stimulus	20/137	334/18888	0.0598802395209581	8.25560557716683	11.435566403141	4.04013071894507e-13	1.90324230253918e-11	8.53628126539313e-12	TP53/PTEN/EGFR/IL1B/MMP2/CASP8/MMP9/CASP3/MYC/BAX/IRF1/PARP1/CASP1/MME/MAPK8/BCL2L1/CASP9/CDKN1A/MAPK14/PTGS2	20
BP	GO:0104004	cellular response to environmental stimulus	20/137	334/18888	0.0598802395209581	8.25560557716683	11.435566403141	4.04013071894507e-13	1.90324230253918e-11	8.53628126539313e-12	TP53/PTEN/EGFR/IL1B/MMP2/CASP8/MMP9/CASP3/MYC/BAX/IRF1/PARP1/CASP1/MME/MAPK8/BCL2L1/CASP9/CDKN1A/MAPK14/PTGS2	20
BP	GO:1905952	regulation of lipid localization	16/137	186/18888	0.0860215053763441	11.8596656463386	12.7220897999698	4.27588826766237e-13	1.99032418173332e-11	8.92685445354074e-12	TNF/IL6/AKT1/CRP/IL1B/PPARG/IL1A/EGF/PON1/SPP1/MIF/NFKBIA/PLA2G10/PPARD/REN/SYK	16
BP	GO:0045862	positive regulation of proteolysis	20/137	336/18888	0.0595238095238095	8.20646506777894	11.3926856271831	4.51417608711147e-13	2.07652100007128e-11	9.31345803235629e-12	PTEN/TNF/AKT1/IL1B/IFNG/PPARG/CASP8/F3/EGF/MYC/BAX/CASP1/S100A9/CLDN4/XDH/CTSD/CASP9/APAF1/CTSS/SYK	20
BP	GO:0031960	response to corticosteroid	15/137	156/18888	0.0961538461538462	13.2565974171814	13.139223583078	4.68640826521573e-13	2.13068096709227e-11	9.55637230091726e-12	NR3C1/CYP1B1/IL10/TNF/IL6/EGFR/ACE/CASP3/BCL2/PARP1/FOS/CASP9/BCHE/CDKN1A/PTGS2	15
BP	GO:2000116	regulation of cysteine-type endopeptidase activity	16/137	190/18888	0.0842105263157895	11.6099884748367	12.5638774545562	5.95054184450259e-13	2.6439339331824e-11	1.18583764508867e-11	TNF/AKT1/PPARG/VEGFA/CASP8/MMP9/F3/MYC/BAX/CASP1/S100A9/XDH/CTSD/CASP9/APAF1/SYK	16
BP	GO:2001242	regulation of intrinsic apoptotic signaling pathway	16/137	190/18888	0.0842105263157895	11.6099884748367	12.5638774545562	5.95054184450259e-13	2.6439339331824e-11	1.18583764508867e-11	TP53/IL10/AKT1/MMP2/MMP9/BCL2/MYC/BAX/MIF/HIF1A/PARP1/S100A9/SOD2/HSPB1/BCL2L1/PTGS2	16
BP	GO:1903829	positive regulation of protein localization	23/137	483/18888	0.0476190476190476	6.56517205422315	10.590435192962	7.31664902830078e-13	3.21439300007371e-11	1.4416957162802e-11	CHRM1/CHRM3/TNF/AKT1/EGFR/IL1B/IFNG/PPARG/TGFB1/F2/PRKACA/IL1A/EGF/HIF1A/PARP1/HSP90AA1/LGALS3/CDK1/ERBB2/MAPK14/PRKCB/PTGS2/CDC42	23
BP	GO:0052547	regulation of peptidase activity	19/137	304/18888	0.0625	8.61678832116788	11.4437572419914	7.66907830065057e-13	3.33178846172708e-11	1.49434905834899e-11	TNF/AKT1/PPARG/VEGFA/CASP8/MMP9/F3/MYC/BAX/CASP1/S100A9/CLDN4/XDH/CTSD/CASP9/APAF1/CTSS/SERPINA1/SYK	19
BP	GO:0097191	extrinsic apoptotic signaling pathway	17/137	230/18888	0.0739130434782609	10.1902887972072	11.9864365117553	9.09386884785838e-13	3.89184571613938e-11	1.74554178572842e-11	TNF/AKT1/IL1B/IFNG/TGFB1/ICAM1/IL2/NOS3/CASP8/IL1A/BCL2/BAX/RELA/BCL2L1/LGALS3/AR/GSTP1	17
BP	GO:0051223	regulation of protein transport	22/137	440/18888	0.05	6.89343065693431	10.691765576438	9.25343239724482e-13	3.89184571613938e-11	1.74554178572842e-11	CHRM1/CHRM3/TNF/IL6/EGFR/IL1B/IFNG/PPARG/TGFB1/F2/PRKACA/IL1A/CCL5/NOS2/HIF1A/HSP90AA1/HSPA8/CDK1/MAPK14/PRKCB/PTGS2/CDC42	22
BP	GO:0051384	response to glucocorticoid	14/137	134/18888	0.104477611940299	14.4041834622508	13.3099174994746	9.25681973403997e-13	3.89184571613938e-11	1.74554178572842e-11	NR3C1/CYP1B1/IL10/TNF/IL6/EGFR/ACE/CASP3/BCL2/FOS/CASP9/BCHE/CDKN1A/PTGS2	14
BP	GO:0007599	hemostasis	17/137	233/18888	0.0729613733905579	10.0590833620501	11.8930747012025	1.12201694079869e-12	4.66711301970517e-11	2.09325892874649e-11	CD40LG/IL6/THBD/F2/NOS3/F3/PLAT/SELP/HSPB1/CTSG/AXL/GPI/F10/MAPK14/PRKCA/SERPINA1/SYK	17
BP	GO:0010952	positive regulation of peptidase activity	15/137	167/18888	0.0898203592814371	12.3834083657503	12.6297742155522	1.27663245541707e-12	5.25435042176922e-11	2.35664229443196e-11	TNF/PPARG/CASP8/F3/MYC/BAX/CASP1/S100A9/CLDN4/XDH/CTSD/CASP9/APAF1/CTSS/SYK	15
BP	GO:0010212	response to ionizing radiation	14/137	138/18888	0.101449275362319	13.9866708981276	13.0877894296918	1.3926323056619e-12	5.67207532826878e-11	2.5439971724043e-11	TP53/THBD/IL1A/CASP3/BCL2/CXCL10/MYC/VCAM1/BAX/PARP1/SOD2/BCL2L1/CDKN1A/MAPK14	14
BP	GO:0043280	positive regulation of cysteine-type endopeptidase activity involved in apoptotic process	13/137	111/18888	0.117117117117117	16.146774511738	13.6803781826036	1.4143121965186e-12	5.70099040039973e-11	2.55696594617471e-11	TNF/PPARG/CASP8/F3/MYC/BAX/CASP1/S100A9/XDH/CTSD/CASP9/APAF1/SYK	13
BP	GO:0050670	regulation of lymphocyte proliferation	17/137	237/18888	0.0717299578059072	9.8893098031969	11.7711992476592	1.47783916452195e-12	5.89627666661307e-11	2.6445542944077e-11	IL10/CD40LG/IL6/IL1B/IL2/IL1A/CCL5/CASP3/BCL2/VCAM1/MIF/IRF1/LGALS3/CDKN1A/ERBB2/PNP/SYK	17
BP	GO:0097529	myeloid leukocyte migration	17/137	239/18888	0.0711297071129707	9.80655407262621	11.7113440285584	1.6927377731175e-12	6.68545928574688e-11	2.99851263159357e-11	IL6/IL1B/MAPK1/MMP2/VEGFA/CXCL8/CCL2/IL1A/CCL5/CXCL10/MIF/S100A9/CTSG/LGALS3/CXCL11/SYK/TREM1	17
BP	GO:1901342	regulation of vasculature development	20/137	362/18888	0.0552486187845304	7.61705044965117	10.8656936943078	1.7890120322476e-12	6.99503704608811e-11	3.13736215339421e-11	CYP1B1/IL10/TNF/IL6/IL1B/PPARG/VEGFA/CXCL8/TGFB1/STAT1/NOS3/IL1A/F3/CXCL10/HIF1A/HSPB1/RELA/ERBB2/PRKCA/PRKCB	20
BP	GO:0033273	response to vitamin	12/137	91/18888	0.131868131868132	18.1804764578487	14.0423950269485	2.51846762008616e-12	9.67752874935074e-11	4.34049344364473e-11	EGFR/IL1A/VDR/CXCL10/SPP1/SOD2/CYP1A1/RELA/PIM1/BCHE/PRKCB/PTGS2	12
BP	GO:0016485	protein processing	17/137	245/18888	0.0693877551020408	9.56639356472516	11.5359329323135	2.52457271722193e-12	9.67752874935074e-11	4.34049344364473e-11	THBD/ACE/PRKACA/CASP8/F3/CASP3/PLAT/PARP1/CASP1/ADAM17/MME/CTSG/CASP9/CTSS/BCHE/C1R/REN	17
BP	GO:1904951	positive regulation of establishment of protein localization	19/137	326/18888	0.0582822085889571	8.03528726881913	10.9523624645286	2.63591065341748e-12	1.00062239367596e-10	4.48791737209354e-11	CHRM1/CHRM3/TNF/EGFR/IL1B/IFNG/PPARG/TGFB1/F2/PRKACA/IL1A/HIF1A/HSP90AA1/CDK1/ERBB2/MAPK14/PRKCB/PTGS2/CDC42	19
BP	GO:1904019	epithelial cell apoptotic process	14/137	147/18888	0.0952380952380952	13.1303441084463	12.6201630165701	3.33264078120304e-12	1.25294475524076e-10	5.61961492053064e-11	IL10/TNF/CD40LG/IL6/TGFB1/CCL2/ICAM1/CASP3/BCL2/BAX/BCL2L1/CASP9/E2F1/ESR1	14
BP	GO:0042098	T cell proliferation	16/137	213/18888	0.0751173708920188	10.3563277475069	11.7380101259455	3.45971054662168e-12	1.28833030831341e-10	5.77832357962076e-11	TP53/IL10/CD40LG/IL6/IL1B/IL2/IL1A/CCL5/CASP3/VCAM1/BAX/IRF1/LGALS3/ERBB2/PNP/SYK	16
BP	GO:0010332	response to gamma radiation	10/137	52/18888	0.192307692307692	26.5131948343627	15.7471416228372	3.52883011939274e-12	1.30167224215336e-10	5.83816383208371e-11	TP53/IL1A/BCL2/CXCL10/MYC/BAX/PARP1/SOD2/BCL2L1/CDKN1A	10
BP	GO:1901653	cellular response to peptide	20/137	376/18888	0.0531914893617021	7.33343686907905	10.6031829378485	3.58534769555591e-12	1.31015976538538e-10	5.87623144200309e-11	CYP1B1/TP53/TNF/INSR/AKT1/IL1B/MAPK1/PPARG/ACE/ICAM1/STAT1/PRKACA/CA2/VCAM1/PARP1/FOS/RELA/CTSD/PRKCA/PRKCB	20
BP	GO:0071496	cellular response to external stimulus	19/137	335/18888	0.0567164179104478	7.81941387950757	10.7644522899901	4.25076548619244e-12	1.53893454176041e-10	6.90231510720917e-11	TP53/EGFR/IL1B/MAPK1/CASP8/BCL2/VDR/VCAM1/HSPA5/IRF1/CASP1/FOS/MAPK8/AXL/HSPA8/PIM1/CDKN1A/PPARD/PTGS2	19
BP	GO:0050867	positive regulation of cell activation	20/137	380/18888	0.0526315789473684	7.25624279677295	10.5307	4.3492753034855e-12	1.56015288409434e-10	6.99748204307759e-11	IL10/TNF/CD40LG/IL6/AKT1/IL1B/IFNG/TGFB1/CCL2/IL2/IL1A/CCL5/BCL2/SELP/VCAM1/MIF/AXL/CDKN1A/PNP/SYK	20
BP	GO:0071276	cellular response to cadmium ion	9/137	37/18888	0.243243243243243	33.535608601302	16.9325418268788	4.46169982732517e-12	1.58593148407649e-10	7.11310230844377e-11	AKT1/EGFR/MAPK1/MMP9/CHUK/JUN/NCF1/FOS/MAPK8	9
BP	GO:0006801	superoxide metabolic process	11/137	73/18888	0.150684931506849	20.7747225277472	14.4693583943521	4.72222144439181e-12	1.6634131394209e-10	7.46061728435918e-11	CRP/EGFR/TGFB1/NOS3/MPO/NOS2/NCF1/SOD2/DUOX2/GSTP1/SYK	11
BP	GO:0050679	positive regulation of epithelial cell proliferation	16/137	219/18888	0.0730593607305936	10.0725927407259	11.5431011863416	5.28756382432582e-12	1.84592629938517e-10	8.2792117775628e-11	IL10/TNF/AKT1/EGFR/VEGFA/F3/CCL5/EGF/MYC/HIF1A/ADAM17/AR/ERBB2/PRKCA/CDC42/SCN5A	16
BP	GO:0051345	positive regulation of hydrolase activity	22/137	482/18888	0.045643153526971	6.29275827603962	10.0613307743411	5.61571243376324e-12	1.9431358952225e-10	8.71520904951053e-11	TNF/AKT1/EGFR/IFNG/PPARG/CCL2/CASP8/F3/CCL5/SELE/MYC/BAX/CASP1/S100A9/CLDN4/XDH/CTSD/CASP9/APAF1/CTSS/ESR1/SYK	22
BP	GO:1903131	mononuclear cell differentiation	22/137	484/18888	0.0454545454545455	6.26675514266755	10.0331950067813	6.09094073699688e-12	2.08908581418051e-10	9.36981280502013e-11	TP53/IL10/CD40LG/IL6/IL1B/IFNG/PPARG/VEGFA/TGFB1/IL2/IL1A/BCL2/MYC/VCAM1/BAX/IRF1/FOS/ADAM17/AXL/ERBB2/PNP/SYK	22
BP	GO:0045785	positive regulation of cell adhesion	22/137	485/18888	0.045360824742268	6.25383399804349	10.019186473587	6.34249216210158e-12	2.15644733511454e-10	9.67193770440388e-11	IL10/TNF/CD40LG/IL6/AKT1/IL1B/IFNG/VEGFA/CCL2/IL2/IL1A/CCL5/SELP/SELE/VCAM1/RELA/CTSG/ERBB2/PNP/PRKCA/SYK/CDC42	22
BP	GO:0043434	response to peptide hormone	21/137	438/18888	0.0479452054794521	6.61013898610139	10.1541142937591	7.09732820382798e-12	2.39228907560064e-10	1.0729717593083e-10	CYP1B1/IL10/INSR/AKT1/IL1B/MAPK1/PPARG/ACE/STAT1/PRKACA/CA2/CHUK/PARP1/FOS/RELA/CTSD/REG1A/MAPK14/PRKCA/PRKCB/PTGS2	21
BP	GO:0034762	regulation of transmembrane transport	22/137	489/18888	0.0449897750511247	6.20267789172003	9.96354336538177	7.44969402425213e-12	2.48959860126717e-10	1.11661630628916e-10	CHRM3/ABCB1/TNF/INSR/AKT1/IL1B/IFNG/ACE/CCL2/F2/PRKACA/MMP9/CA2/BCL2/CXCL10/BAX/CXCL11/CTSS/PIM1/MAPK14/PRKCB/SCN5A	22
BP	GO:0048661	positive regulation of smooth muscle cell proliferation	12/137	100/18888	0.12	16.5442335766423	13.3216676509268	7.93430741280716e-12	2.60698672135092e-10	1.16926635557158e-10	IL10/TNF/IL6/AKT1/EGFR/MMP2/TGFB1/STAT1/MMP9/CCL5/JUN/PTGS2	12
BP	GO:2001237	negative regulation of extrinsic apoptotic signaling pathway	12/137	100/18888	0.12	16.5442335766423	13.3216676509268	7.93430741280716e-12	2.60698672135092e-10	1.16926635557158e-10	TNF/AKT1/IL1B/ICAM1/NOS3/IL1A/BCL2/RELA/BCL2L1/LGALS3/AR/GSTP1	12
BP	GO:2001056	positive regulation of cysteine-type endopeptidase activity	13/137	127/18888	0.102362204724409	14.1125352031726	12.6733110073069	8.1205985450334e-12	2.64596169259005e-10	1.186747120704e-10	TNF/PPARG/CASP8/F3/MYC/BAX/CASP1/S100A9/XDH/CTSD/CASP9/APAF1/SYK	13
BP	GO:0007596	blood coagulation	16/137	226/18888	0.0707964601769911	9.76060977972999	11.3250211048488	8.53319988288839e-12	2.75742244149534e-10	1.2367386694121e-10	CD40LG/IL6/THBD/F2/NOS3/F3/PLAT/SELP/HSPB1/CTSG/AXL/F10/MAPK14/PRKCA/SERPINA1/SYK	16
BP	GO:0045765	regulation of angiogenesis	19/137	353/18888	0.0538243626062323	7.42069	10.4088399727004	1.05916385594414e-11	3.39453334159145e-10	1.52249092666344e-10	CYP1B1/IL10/TNF/IL6/IL1B/PPARG/VEGFA/CXCL8/STAT1/NOS3/IL1A/F3/CXCL10/HIF1A/HSPB1/RELA/ERBB2/PRKCA/PRKCB	19
BP	GO:0002685	regulation of leukocyte migration	16/137	230/18888	0.0695652173913043	9.59086004443034	11.2046314077998	1.11339301878258e-11	3.51744473105042e-10	1.57761823177547e-10	TNF/IL6/AKT1/MAPK1/VEGFA/CXCL8/CCL2/ICAM1/IL1A/CCL5/SELP/SELE/CXCL10/MIF/ADAM17/LGALS3	16
BP	GO:0070228	regulation of lymphocyte apoptotic process	10/137	58/18888	0.172413793103448	23.7704505411528	14.8453355131247	1.12186558261865e-11	3.51744473105042e-10	1.57761823177547e-10	TP53/IL10/IL2/CCL5/BCL2/BAX/MIF/HIF1A/LGALS3/BIRC7	10
BP	GO:0071466	cellular response to xenobiotic stimulus	15/137	194/18888	0.077319587628866	10.6599443148469	11.5598959630403	1.12450279125653e-11	3.51744473105042e-10	1.57761823177547e-10	CYP3A4/ABCB1/CYP1B1/CYP2C9/TP53/EGFR/IL1B/NOS2/MYC/GSTM1/CYP1A1/BCHE/E2F1/GSTP1/REN	15
BP	GO:0070227	lymphocyte apoptotic process	11/137	79/18888	0.139240506329114	19.1968955003234	13.8534375186863	1.15586383375558e-11	3.58684729363835e-10	1.60874615458379e-10	TP53/IL10/AKT1/IL2/CCL5/BCL2/BAX/MIF/HIF1A/LGALS3/BIRC7	11
BP	GO:0050817	coagulation	16/137	231/18888	0.0692640692640693	9.54934116977913	11.1749937620709	1.18898919044372e-11	3.66058876742908e-10	1.64182013367529e-10	CD40LG/IL6/THBD/F2/NOS3/F3/PLAT/SELP/HSPB1/CTSG/AXL/F10/MAPK14/PRKCA/SERPINA1/SYK	16
BP	GO:1902894	negative regulation of miRNA transcription	8/137	27/18888	0.296296296296296	40.8499594484996	17.711566136583	1.23198908289382e-11	3.76334165165223e-10	1.68790609547789e-10	TNF/PPARG/VEGFA/TGFB1/HIF1A/RELA/ESR1/PPARD	8
BP	GO:0032602	chemokine production	12/137	105/18888	0.114285714285714	15.7564129301356	12.9605229890362	1.42961147955958e-11	4.33316347680462e-10	1.9434783557293e-10	IL10/TNF/IL6/IL1B/IFNG/TGFB1/MIF/HIF1A/ADAM17/GSTP1/SYK/TREM1	12
BP	GO:0070665	positive regulation of leukocyte proliferation	14/137	164/18888	0.0853658536585366	11.7692718533025	11.8396402049566	1.48793304096573e-11	4.47524476167384e-10	2.00720360020154e-10	CD40LG/IL6/IL1B/MAPK1/IL2/IL1A/CCL5/BCL2/VCAM1/MIF/BCL2L1/CDKN1A/PNP/SYK	14
BP	GO:0002696	positive regulation of leukocyte activation	19/137	362/18888	0.0524861878453039	7.23619792716861	10.240305255231	1.63894801128993e-11	4.89182192682718e-10	2.19404370173485e-10	IL10/TNF/CD40LG/IL6/AKT1/IL1B/IFNG/TGFB1/CCL2/IL2/IL1A/CCL5/BCL2/VCAM1/MIF/AXL/CDKN1A/PNP/SYK	19
BP	GO:2000629	negative regulation of miRNA metabolic process	8/137	28/18888	0.285714285714286	39.3910323253389	17.3767086159952	1.71431521172865e-11	5.07800945292349e-10	2.27755115051031e-10	TNF/PPARG/VEGFA/TGFB1/HIF1A/RELA/ESR1/PPARD	8
BP	GO:0009416	response to light stimulus	18/137	321/18888	0.0560747663551402	7.73095026945904	10.3965102524248	1.96558836274424e-11	5.77853420927066e-10	2.59174532040515e-10	TP53/AKT1/EGFR/MMP2/MMP9/CASP3/BCL2/MYC/BAX/HIF1A/PARP1/FOS/MME/RELA/MAPK8/CASP9/CDKN1A/MAPK14	18
BP	GO:0052548	regulation of endopeptidase activity	17/137	280/18888	0.0607142857142857	8.37059436913451	10.6208979223101	2.12460980471532e-11	6.1994211465947e-10	2.780518408999e-10	TNF/AKT1/PPARG/VEGFA/CASP8/MMP9/F3/MYC/BAX/CASP1/S100A9/XDH/CTSD/CASP9/APAF1/SERPINA1/SYK	17
BP	GO:0022409	positive regulation of cell-cell adhesion	18/137	325/18888	0.0553846153846154	7.63580011229646	10.3143164197849	2.412316751168e-11	6.98678407190138e-10	3.13366059060108e-10	IL10/TNF/CD40LG/IL6/AKT1/IL1B/IFNG/CCL2/IL2/IL1A/CCL5/SELP/SELE/VCAM1/RELA/CTSG/PNP/SYK	18
BP	GO:0043269	regulation of monoatomic ion transport	21/137	470/18888	0.0446808510638298	6.1600869700264	9.68309678881624	2.66493517511791e-11	7.66168862846398e-10	3.43636377844151e-10	CHRM1/ABCB1/AKT1/IFNG/ACE/CCL2/F2/NOS3/PRKACA/MMP9/CCL5/CA2/EGF/BCL2/CXCL10/BAX/LGALS3/CXCL11/CTSS/PTGS2/SCN5A	21
BP	GO:0051251	positive regulation of lymphocyte activation	18/137	328/18888	0.0548780487804878	7.56596047712302	10.253585495612	2.80748841771419e-11	8.01261292938866e-10	3.59375774407363e-10	IL10/CD40LG/IL6/AKT1/IL1B/IFNG/TGFB1/CCL2/IL2/IL1A/CCL5/BCL2/VCAM1/MIF/AXL/CDKN1A/PNP/SYK	18
BP	GO:0010631	epithelial cell migration	19/137	375/18888	0.0506666666666667	6.98534306569343	10.0068142495329	3.01309692762063e-11	8.53710796159179e-10	3.82900036721279e-10	CYP1B1/PTEN/TNF/AKT1/IFNG/PPARG/VEGFA/TGFB1/NOS3/MMP9/EGF/HIF1A/ADAM17/S100A9/HSPB1/GPI/PPARD/PRKCA/PTGS2	19
BP	GO:0042742	defense response to bacterium	18/137	330/18888	0.0545454545454545	7.52010617120106	10.2135238945557	3.10353029292076e-11	8.73007442109365e-10	3.91554825293903e-10	IL10/TNF/IL6/CRP/IL1B/F2/MPO/SELP/NOS2/CASP1/LCN2/ADAM17/S100A9/RNASE3/LYZ/CTSG/SYK/TREM1	18
BP	GO:0051347	positive regulation of transferase activity	19/137	376/18888	0.050531914893617	6.9667650256251	9.98931582040996	3.15437614611712e-11	8.80972195094137e-10	3.9512711725046e-10	PTEN/TNF/INSR/AKT1/EGFR/IL1B/MAPK1/IFNG/VEGFA/F2/CCL5/EGF/MYC/NCF1/ADAM17/HSP90AA1/AXL/CDKN1A/ERBB2	19
BP	GO:0043410	positive regulation of MAPK cascade	21/137	475/18888	0.0442105263157895	6.09524394928928	9.61344546492587	3.24566833605752e-11	9.00039942835807e-10	4.03679242095694e-10	TNF/INSR/IL6/EGFR/IL1B/VEGFA/TGFB1/CCL2/ICAM1/IL1A/CCL5/EGF/MIF/NCF1/XDH/BIRC7/AR/ERBB2/PRKCA/SYK/CDC42	21
BP	GO:0090132	epithelium migration	19/137	378/18888	0.0502645502645503	6.92990383501332	9.95451024399259	3.45565518048213e-11	9.51521954625714e-10	4.26769572326407e-10	CYP1B1/PTEN/TNF/AKT1/IFNG/PPARG/VEGFA/TGFB1/NOS3/MMP9/EGF/HIF1A/ADAM17/S100A9/HSPB1/GPI/PPARD/PRKCA/PTGS2	19
BP	GO:0010575	positive regulation of vascular endothelial growth factor production	8/137	31/18888	0.258064516129032	35.5789969390158	16.4697305639109	4.27237781216575e-11	1.1681816255642e-09	5.23944161580282e-10	CYP1B1/IL6/IL1B/TGFB1/IL1A/HIF1A/RELA/PTGS2	8
BP	GO:0090130	tissue migration	19/137	383/18888	0.0496083550913838	6.83943511654057	9.86859295793157	4.33027708600439e-11	1.1757905143248e-09	5.27356843953458e-10	CYP1B1/PTEN/TNF/AKT1/IFNG/PPARG/VEGFA/TGFB1/NOS3/MMP9/EGF/HIF1A/ADAM17/S100A9/HSPB1/GPI/PPARD/PRKCA/PTGS2	19
BP	GO:0032946	positive regulation of mononuclear cell proliferation	13/137	146/18888	0.089041095890411	12.2759724027597	11.6910097375766	4.82096633898802e-11	1.29999850934091e-09	5.830656929767e-10	CD40LG/IL6/IL1B/IL2/IL1A/CCL5/BCL2/VCAM1/MIF/BCL2L1/CDKN1A/PNP/SYK	13
BP	GO:0033209	tumor necrosis factor-mediated signaling pathway	12/137	117/18888	0.102564102564103	14.1403705783268	12.1867077385042	5.21543376209763e-11	1.39673602806861e-09	6.26453687646334e-10	TP53/TNF/STAT1/CASP8/CHUK/NFKBIA/CASP1/ADAM17/RELA/BIRC7/GSTP1/SYK	12
BP	GO:0048511	rhythmic process	17/137	297/18888	0.0572390572390572	7.89146943891469	10.2321816293696	5.37246837769721e-11	1.4290034936596e-09	6.40926052076158e-10	CYP1B1/TP53/PTEN/TNF/EGFR/MMP2/PPARG/NOS3/CASP3/NOS2/PARP1/TOP1/CLDN4/MAPK8/AXL/CDK1/ESR1	17
BP	GO:0042129	regulation of T cell proliferation	14/137	181/18888	0.0773480662983425	10.6638706295116	11.1665207824744	5.6359933795988e-11	1.48896852123184e-09	6.67821121650896e-10	IL10/CD40LG/IL6/IL1B/IL2/IL1A/CCL5/CASP3/VCAM1/IRF1/LGALS3/ERBB2/PNP/SYK	14
BP	GO:0030099	myeloid cell differentiation	20/137	439/18888	0.0455580865603645	6.28103021132966	9.56960591473588	5.86535115733385e-11	1.53916261913928e-09	6.9033380629588e-10	NR3C1/TNF/IFNG/PPARG/VEGFA/TGFB1/STAT1/CASP8/MMP9/CASP3/MYC/HIF1A/NFKBIA/PARP1/FOS/CASP9/PLA2G10/MAPK14/PRKCA/CDC42	20
BP	GO:0045088	regulation of innate immune response	20/137	440/18888	0.0454545454545455	6.26675514266755	9.55486110074857	6.10782290265568e-11	1.59210583662558e-09	7.14079505671886e-10	TNF/AKT1/PPARG/TGFB1/CASP8/CCL5/CHUK/NFKBIA/NCF1/IRF1/PARP1/CASP1/HSP90AA1/S100A9/RELA/MAPK8/HSPA8/CTSS/ESR1/SYK	20
BP	GO:0002687	positive regulation of leukocyte migration	13/137	149/18888	0.087248322147651	12.028805173174	11.5525524858916	6.23637726037673e-11	1.61485000583265e-09	7.24280551815101e-10	TNF/IL6/MAPK1/VEGFA/CXCL8/ICAM1/IL1A/CCL5/SELP/SELE/CXCL10/ADAM17/LGALS3	13
BP	GO:0042063	gliogenesis	18/137	346/18888	0.0520231213872832	7.17235559681026	9.9046756043009	6.75389940639078e-11	1.73735175519658e-09	7.79224128188853e-10	CHRM1/NR3C1/TP53/PTEN/TNF/IL6/AKT1/EGFR/IL1B/MAPK1/IFNG/TGFB1/CCL2/F2/S100A9/RELA/CDK1/ERBB2	18
BP	GO:0010950	positive regulation of endopeptidase activity	13/137	153/18888	0.0849673202614379	11.714326606555	11.3740021086301	8.71244076195006e-11	2.22651263916501e-09	9.98618941135796e-10	TNF/PPARG/CASP8/F3/MYC/BAX/CASP1/S100A9/XDH/CTSD/CASP9/APAF1/SYK	13
BP	GO:0010720	positive regulation of cell development	20/137	454/18888	0.0440528634361234	6.07350718672626	9.3531084828676	1.06498676932036e-10	2.70395991431339e-09	1.21276005310166e-09	IL10/TNF/IL6/EGFR/IL1B/IFNG/VEGFA/TGFB1/ACE/IL2/CASP8/BCL2/HIF1A/FOS/MME/RELA/AXL/PNP/PRKCA/SYK	20
BP	GO:0007249	canonical NF-kappaB signal transduction	17/137	311/18888	0.0546623794212219	7.53622644166452	9.93456945377388	1.10304443966615e-10	2.78251855425461e-09	1.2479945918396e-09	TNF/AKT1/IL1B/VEGFA/TGFB1/STAT1/CASP8/IL1A/CHUK/NFKBIA/PARP1/CASP1/HSPB1/RELA/ESR1/GSTP1/PRKCB	17
BP	GO:0006690	icosanoid metabolic process	12/137	125/18888	0.096	13.2353868613139	11.7314347544418	1.14130752056246e-10	2.84236458942624e-09	1.27483629182504e-09	CYP1B1/CYP2C9/IL1B/MIF/CASP1/GSTM1/CYP1A1/PTGS1/PLA2G10/GSTP1/PTGS2/SYK	12
BP	GO:0022612	gland morphogenesis	12/137	125/18888	0.096	13.2353868613139	11.7314347544418	1.14130752056246e-10	2.84236458942624e-09	1.27483629182504e-09	NR3C1/TNF/IL6/EGFR/MMP2/TGFB1/BCL2/VDR/BAX/AR/ESR1/CDC42	12
BP	GO:0018108	peptidyl-tyrosine phosphorylation	16/137	269/18888	0.0594795539033457	8.20036	10.1667454261133	1.16454832565044e-10	2.88188857803369e-09	1.29256329815699e-09	TP53/TNF/INSR/IL6/EGFR/IFNG/VEGFA/TGFB1/IL2/CCL5/EGF/MIF/NCF1/ADAM17/ERBB2/SYK	16
BP	GO:0018212	peptidyl-tyrosine modification	16/137	271/18888	0.0590405904059041	8.13984431815121	10.1192446332901	1.29964039193506e-10	3.19597102670824e-09	1.43343322937029e-09	TP53/TNF/INSR/IL6/EGFR/IFNG/VEGFA/TGFB1/IL2/CCL5/EGF/MIF/NCF1/ADAM17/ERBB2/SYK	16
BP	GO:0097237	cellular response to toxic substance	12/137	129/18888	0.0930232558139535	12.824987268715	11.5191451859517	1.65373359814751e-10	4.04131148047298e-09	1.8125790621801e-09	CYP1B1/TNF/NOS3/MPO/GSTM1/S100A9/SOD2/PTGS1/PIM1/DUOX2/GSTP1/PTGS2	12
BP	GO:1903039	positive regulation of leukocyte cell-cell adhesion	16/137	277/18888	0.0577617328519856	7.96353000079054	9.9796207602103	1.7965464708378e-10	4.36304142917752e-09	1.95687899340685e-09	TNF/CD40LG/IL6/AKT1/IL1B/IFNG/CCL2/IL2/IL1A/CCL5/SELP/SELE/VCAM1/RELA/PNP/SYK	16
BP	GO:0042113	B cell activation	16/137	278/18888	0.0575539568345324	7.93488420942078	9.95675870304461	1.89467503683739e-10	4.57295024323099e-09	2.05102573838278e-09	TP53/IL10/CD40LG/IL6/TGFB1/IL2/CASP8/CASP3/BCL2/VCAM1/BAX/MIF/ADAM17/CDKN1A/PRKCB/SYK	16
BP	GO:0050731	positive regulation of peptidyl-tyrosine phosphorylation	13/137	164/18888	0.0792682926829268	10.9286095780666	10.9154236926191	2.08210730220809e-10	4.99450279241328e-09	2.24009736227232e-09	TP53/TNF/IL6/IFNG/VEGFA/TGFB1/IL2/CCL5/EGF/MIF/NCF1/ADAM17/SYK	13
BP	GO:0042445	hormone metabolic process	15/137	240/18888	0.0625	8.61678832116788	10.1505817600814	2.30285323939826e-10	5.49033912563854e-09	2.4624861982269e-09	CYP3A4/NR3C1/CYP1B1/CYP2C9/ACE/SPP1/HIF1A/MME/CYP1A1/CTSB/CTSG/BCHE/DUOX2/ESR1/REN	15
BP	GO:0032642	regulation of chemokine production	11/137	104/18888	0.105769230769231	14.5822571588995	11.872006770049	2.44690536901461e-10	5.79842423808917e-09	2.60066624866242e-09	IL10/TNF/IL6/IL1B/IFNG/TGFB1/MIF/HIF1A/ADAM17/GSTP1/SYK	11
BP	GO:0043122	regulation of canonical NF-kappaB signal transduction	16/137	286/18888	0.0559440559440559	7.71292940636006	9.77788293751326	2.87699178029865e-10	6.77652883190828e-09	3.03935846923117e-09	TNF/IL1B/VEGFA/TGFB1/STAT1/CASP8/IL1A/CHUK/NFKBIA/PARP1/CASP1/HSPB1/RELA/ESR1/GSTP1/PRKCB	16
BP	GO:0070371	ERK1 and ERK2 cascade	17/137	332/18888	0.0512048192771084	7.05954	9.52129209085542	3.03403793472821e-10	7.10364570346545e-09	3.18607450315613e-09	TNF/EGFR/IL1B/MAPK1/TGFB1/CCL2/ICAM1/IL1A/CCL5/EGF/MYC/MIF/CDK1/ERBB2/GSTP1/PRKCA/SYK	17
BP	GO:0030168	platelet activation	12/137	136/18888	0.0882352941176471	12.1648776298841	11.1693829503218	3.07140604293163e-10	7.14833192134684e-09	3.20611683428828e-09	CD40LG/IL6/THBD/F2/NOS3/SELP/HSPB1/CTSG/AXL/MAPK14/PRKCA/SYK	12
BP	GO:0051090	regulation of DNA-binding transcription factor activity	18/137	381/18888	0.047244094488189	6.51347778607966	9.2928657111695	3.22831409926639e-10	7.46905806398318e-09	3.34996654585973e-09	CYP1B1/PTEN/IL10/TNF/CD40LG/IL6/AKT1/IL1B/PPARG/CHUK/NFKBIA/S100A9/RELA/PLA2G10/PIM1/AR/ESR1/SYK	18
BP	GO:0050863	regulation of T cell activation	18/137	382/18888	0.0471204188481675	6.49642679711086	9.27652688684128	3.36748169617918e-10	7.74520790121211e-09	3.47382322342694e-09	IL10/CD40LG/IL6/AKT1/IL1B/IFNG/CCL2/IL2/IL1A/CCL5/CASP3/VCAM1/IRF1/CTSG/LGALS3/ERBB2/PNP/SYK	18
BP	GO:0023061	signal release	20/137	487/18888	0.0410677618069815	5.66195536503844	8.90925595297144	3.65782480280135e-10	8.363798233306e-09	3.7512687728329e-09	CHRM3/TNF/IL6/EGFR/IL1B/IFNG/PPARG/F2/PRKACA/IL1A/CCL5/NOS2/SPP1/MIF/HIF1A/PLA2G10/PRKCB/PTGS2/REN/SYK	20
BP	GO:0051235	maintenance of location	17/137	337/18888	0.0504451038575668	6.95479650847972	9.42817792146154	3.81863750996243e-10	8.68073992090297e-09	3.89342110868875e-09	IL10/TNF/IL6/AKT1/CRP/IL1B/PPARG/F2/PRKACA/CXCL10/BAX/HSPA5/NFKBIA/S100A9/PLA2G10/CXCL11/PPARD	17
BP	GO:0060135	maternal process involved in female pregnancy	9/137	59/18888	0.152542372881356	21.0308053940369	13.1716549910438	3.93919254217407e-10	8.86035422977574e-09	3.97398038681017e-09	AKT1/VDR/SPP1/PARP1/CTSB/AR/ESR1/PPARD/PTGS2	9
BP	GO:0045429	positive regulation of nitric oxide biosynthetic process	8/137	40/18888	0.2	27.5737226277372	14.3806763940074	3.94297093601273e-10	8.86035422977574e-09	3.97398038681017e-09	TNF/INSR/AKT1/IL1B/IFNG/HSP90AA1/SOD2/PTGS2	8
BP	GO:0048144	fibroblast proliferation	11/137	110/18888	0.1	13.7868613138686	11.4964879088503	4.50801183153875e-10	1.0072186435038e-08	4.51750238276304e-09	TP53/EGFR/MYC/BAX/MIF/SOD2/CDK1/CDKN1A/E2F1/ESR1/GSTP1	11
BP	GO:0002833	positive regulation of response to biotic stimulus	18/137	390/18888	0.0461538461538462	6.36316676024705	9.14788663000873	4.69834045592651e-10	1.04377904447004e-08	4.68148038252008e-09	TNF/AKT1/CCL5/CHUK/MIF/NFKBIA/IRF1/PARP1/CASP1/HSP90AA1/S100A9/RELA/MAPK8/HSPA8/CTSS/ESR1/PRKCA/SYK	18
BP	GO:1904407	positive regulation of nitric oxide metabolic process	8/137	41/18888	0.195121951219512	26.9011928075485	14.1912331329273	4.86911852848089e-10	1.07560753934239e-08	4.82423518789721e-09	TNF/INSR/AKT1/IL1B/IFNG/HSP90AA1/SOD2/PTGS2	8
BP	GO:0046883	regulation of hormone secretion	15/137	254/18888	0.0590551181102362	8.14184723259957	9.79498839445336	5.07390004048053e-10	1.11454770552129e-08	4.99888673414581e-09	CHRM3/TNF/IL6/EGFR/IL1B/IFNG/PPARG/F2/PRKACA/CCL5/NOS2/SPP1/HIF1A/PRKCB/REN	15
BP	GO:0010632	regulation of epithelial cell migration	16/137	298/18888	0.0536912751677852	7.40234164503013	9.52218992497166	5.25257988317819e-10	1.14735124822496e-08	5.14601475176411e-09	PTEN/TNF/AKT1/IFNG/PPARG/VEGFA/TGFB1/NOS3/MMP9/EGF/HIF1A/ADAM17/HSPB1/GPI/PRKCA/PTGS2	16
BP	GO:0010634	positive regulation of epithelial cell migration	13/137	177/18888	0.0734463276836158	10.1259433378696	10.4266659201773	5.37662520310603e-10	1.16627734619275e-08	5.23090068315285e-09	AKT1/IFNG/VEGFA/TGFB1/NOS3/MMP9/EGF/HIF1A/ADAM17/HSPB1/GPI/PRKCA/PTGS2	13
BP	GO:0001667	ameboidal-type cell migration	20/137	498/18888	0.0401606425702811	5.53689209392314	8.77024677601924	5.39887978672348e-10	1.16627734619275e-08	5.23090068315285e-09	CYP1B1/PTEN/TNF/AKT1/IFNG/PPARG/VEGFA/TGFB1/NOS3/MMP9/EGF/HIF1A/ADAM17/S100A9/HSPB1/GPI/PPARD/PRKCA/PTGS2/CDC42	20
BP	GO:0050671	positive regulation of lymphocyte proliferation	12/137	143/18888	0.0839160839160839	11.5693941095401	10.8443854410654	5.51010329048404e-10	1.17851333563919e-08	5.28578063581879e-09	CD40LG/IL6/IL1B/IL2/IL1A/CCL5/BCL2/VCAM1/MIF/CDKN1A/PNP/SYK	12
BP	GO:0043491	phosphatidylinositol 3-kinase/protein kinase B signal transduction	16/137	299/18888	0.0535117056856187	7.3775846495618	9.50152617260988	5.51580410286373e-10	1.17851333563919e-08	5.28578063581879e-09	PTEN/TNF/INSR/AKT1/EGFR/TGFB1/F2/CCL5/EGF/SELP/NCF1/XDH/AXL/ERBB2/PPARD/CDC42	16
BP	GO:0045927	positive regulation of growth	15/137	258/18888	0.0581395348837209	8.01561704294687	9.69837241305312	6.3009328158838e-10	1.33894822337531e-08	6.00535129934921e-09	INSR/AKT1/EGFR/VEGFA/F2/IL2/BCL2/ADAM17/S100A9/PIM1/CDK1/ERBB2/MAPK14/PPARD/CDC42	15
BP	GO:0097305	response to alcohol	15/137	259/18888	0.0579150579150579	7.98466871459572	9.67454345586543	6.64751948818267e-10	1.40496222696185e-08	6.30143241383347e-09	CYP1B1/TNF/AKT1/TGFB1/ACE/IL2/CASP8/VCAM1/PARP1/FOS/SOD2/BCL2L1/CDK1/CDKN1A/PRKCB	15
BP	GO:0033674	positive regulation of kinase activity	16/137	303/18888	0.0528052805280528	7.28019079280191	9.41981614172455	6.69483755283165e-10	1.40735563610601e-08	6.312167155075e-09	TNF/INSR/AKT1/EGFR/IL1B/IFNG/VEGFA/F2/CCL5/EGF/NCF1/ADAM17/HSP90AA1/AXL/CDKN1A/ERBB2	16
BP	GO:0045598	regulation of fat cell differentiation	12/137	146/18888	0.0821917808219178	11.3316668333167	10.7119468937456	7.00992173868315e-10	1.45824524010724e-08	6.54041343389061e-09	TNF/IL6/AKT1/PPARG/TGFB1/SOD2/PIM1/E2F1/MAPK14/PPARD/PTGS2/RUNX1T1	12
BP	GO:0010001	glial cell differentiation	15/137	260/18888	0.0576923076923077	7.95395845030882	9.65084204600603	7.01151164041334e-10	1.45824524010724e-08	6.54041343389061e-09	NR3C1/PTEN/TNF/IL6/AKT1/EGFR/IL1B/MAPK1/IFNG/TGFB1/F2/S100A9/RELA/CDK1/ERBB2	15
BP	GO:0001936	regulation of endothelial cell proliferation	13/137	181/18888	0.0718232044198895	9.90216558454652	10.2863770449595	7.08693999677358e-10	1.46613414748067e-08	6.57579617634351e-09	IL10/TNF/AKT1/PPARG/VEGFA/CCL2/STAT1/F3/EGF/HIF1A/ADAM17/XDH/PRKCA	13
BP	GO:0045428	regulation of nitric oxide biosynthetic process	9/137	63/18888	0.142857142857143	19.6955161626694	12.704857525769	7.24024423873954e-10	1.47133009766823e-08	6.59910066688724e-09	IL10/TNF/INSR/AKT1/IL1B/IFNG/HSP90AA1/SOD2/PTGS2	9
BP	GO:0015908	fatty acid transport	11/137	115/18888	0.0956521739130435	13.1874325610917	11.2053096514669	7.29596995561195e-10	1.47133009766823e-08	6.59910066688724e-09	AKT1/IL1B/PPARG/ACE/IL1A/NOS2/MIF/PLA2G10/PPARD/PTGS2/SYK	11
BP	GO:0032355	response to estradiol	11/137	115/18888	0.0956521739130435	13.1874325610917	11.2053096514669	7.29596995561195e-10	1.47133009766823e-08	6.59910066688724e-09	CYP1B1/IL10/EGFR/MMP2/TGFB1/CASP8/CASP3/CASP9/GPI/ESR1/PTGS2	11
BP	GO:0032768	regulation of monooxygenase activity	8/137	43/18888	0.186046511627907	25.65	13.8319110915947	7.30020559968378e-10	1.47133009766823e-08	6.59910066688724e-09	TNF/AKT1/EGFR/IL1B/IFNG/IL1A/VDR/HIF1A	8
BP	GO:0042554	superoxide anion generation	8/137	43/18888	0.186046511627907	25.65	13.8319110915947	7.30020559968378e-10	1.47133009766823e-08	6.59910066688724e-09	CRP/EGFR/TGFB1/NCF1/SOD2/DUOX2/GSTP1/SYK	8
BP	GO:0032102	negative regulation of response to external stimulus	19/137	456/18888	0.0416666666666667	5.74452554744526	8.76634456475831	8.25261935070072e-10	1.65475598262768e-08	7.4217888465681e-09	PTEN/IL10/TNF/THBD/PPARG/TGFB1/CCL2/F2/IL2/NOS3/PLAT/SPP1/MIF/PARP1/PLA2G10/GSTP1/MAPK14/PPARD/SYK	19
BP	GO:0008631	intrinsic apoptotic signaling pathway in response to oxidative stress	9/137	64/18888	0.140625	19.3877737226277	12.5948423989741	8.37364560380066e-10	1.67045685259493e-08	7.49220922445322e-09	CYP1B1/IL10/AKT1/MMP2/BCL2/HIF1A/PARP1/SOD2/HSPB1	9
BP	GO:0010573	vascular endothelial growth factor production	9/137	65/18888	0.138461538461538	19.0895002807412	12.4872953488234	9.66015352203162e-10	1.89805026488159e-08	8.51299432303871e-09	CYP1B1/TNF/IL6/IL1B/TGFB1/IL1A/HIF1A/RELA/PTGS2	9
BP	GO:0030225	macrophage differentiation	9/137	65/18888	0.138461538461538	19.0895002807412	12.4872953488234	9.66015352203162e-10	1.89805026488159e-08	8.51299432303871e-09	NR3C1/IFNG/VEGFA/TGFB1/CASP8/MMP9/PARP1/PRKCA/CDC42	9
BP	GO:0080164	regulation of nitric oxide metabolic process	9/137	65/18888	0.138461538461538	19.0895002807412	12.4872953488234	9.66015352203162e-10	1.89805026488159e-08	8.51299432303871e-09	IL10/TNF/INSR/AKT1/IL1B/IFNG/HSP90AA1/SOD2/PTGS2	9
BP	GO:0071375	cellular response to peptide hormone stimulus	16/137	311/18888	0.0514469453376206	7.09291900391954	9.26077570305884	9.77710734131067e-10	1.91142448522624e-08	8.57297938453872e-09	CYP1B1/INSR/AKT1/IL1B/MAPK1/PPARG/ACE/STAT1/PRKACA/CA2/PARP1/FOS/RELA/CTSD/PRKCA/PRKCB	16
BP	GO:0050730	regulation of peptidyl-tyrosine phosphorylation	14/137	225/18888	0.0622222222222222	8.57849148418491	9.77491196630133	1.00395365903754e-09	1.94686558465958e-08	8.73193717604756e-09	TP53/TNF/IL6/EGFR/IFNG/VEGFA/TGFB1/IL2/CCL5/EGF/MIF/NCF1/ADAM17/SYK	14
BP	GO:0034644	cellular response to UV	10/137	90/18888	0.111111111111111	15.3187347931873	11.6385703009457	1.010776761345e-09	1.94686558465958e-08	8.73193717604756e-09	TP53/MMP2/MMP9/MYC/BAX/PARP1/MME/CASP9/CDKN1A/MAPK14	10
BP	GO:0048145	regulation of fibroblast proliferation	10/137	90/18888	0.111111111111111	15.3187347931873	11.6385703009457	1.010776761345e-09	1.94686558465958e-08	8.73193717604756e-09	TP53/EGFR/MYC/BAX/MIF/SOD2/CDKN1A/E2F1/ESR1/GSTP1	10
BP	GO:0032309	icosanoid secretion	8/137	45/18888	0.177777777777778	24.5099756690998	13.4962454920671	1.07203843357807e-09	2.05474033102464e-08	9.21576899040799e-09	IL1B/ACE/IL1A/NOS2/MIF/PLA2G10/PTGS2/SYK	8
BP	GO:0050708	regulation of protein secretion	15/137	269/18888	0.0557620817843866	7.68784088133938	9.4430752951249	1.12121232751771e-09	2.13850741492403e-08	9.59147490446474e-09	CHRM3/TNF/IL6/EGFR/IL1B/IFNG/PPARG/TGFB1/F2/PRKACA/IL1A/CCL5/NOS2/HIF1A/PRKCB	15
BP	GO:0071346	cellular response to type II interferon	11/137	120/18888	0.0916666666666667	12.6379562043796	10.9317049389839	1.15418595470357e-09	2.19071217616066e-08	9.82561982900433e-09	TP53/TNF/IFNG/PPARG/CCL2/STAT1/CCL5/NOS2/IRF1/CASP1/CDC42	11
BP	GO:1905953	negative regulation of lipid localization	9/137	67/18888	0.134328358208955	18.5196644514653	12.2792373712063	1.27640443524033e-09	2.41098615545395e-08	1.08135763494044e-08	TNF/IL6/AKT1/CRP/PPARG/EGF/NFKBIA/PLA2G10/PPARD	9
BP	GO:1904018	positive regulation of vasculature development	13/137	190/18888	0.068421052631579	9.43311563580484	9.98612125353739	1.2874727168808e-09	2.42020111682881e-08	1.08549066109484e-08	CYP1B1/IL10/IL1B/VEGFA/CXCL8/TGFB1/NOS3/IL1A/F3/HIF1A/HSPB1/PRKCA/PRKCB	13
BP	GO:0097530	granulocyte migration	12/137	154/18888	0.0779220779220779	10.7430088160015	10.3769029454519	1.29761771546377e-09	2.42760060644179e-08	1.08880942531485e-08	IL1B/MAPK1/CXCL8/CCL2/IL1A/CCL5/CXCL10/S100A9/LGALS3/CXCL11/SYK/TREM1	12
BP	GO:0097696	receptor signaling pathway via STAT	13/137	191/18888	0.0680628272251309	9.38372759582681	9.9539953883777	1.37305099784445e-09	2.55649019122466e-08	1.1466180262701e-08	CYP1B1/IL10/TNF/IL6/IFNG/PPARG/TGFB1/CCL2/F2/IL2/STAT1/CCL5/EGF	13
BP	GO:0006919	activation of cysteine-type endopeptidase activity involved in apoptotic process	9/137	68/18888	0.132352941176471	18.2473164448261	12.1785542565135	1.46214172553316e-09	2.70946642030078e-08	1.21522979034086e-08	TNF/PPARG/CASP8/F3/BAX/S100A9/XDH/CASP9/APAF1	9
BP	GO:0032368	regulation of lipid transport	12/137	156/18888	0.0769230769230769	10.6052779337451	10.2969764000052	1.50511980176744e-09	2.77490278695689e-08	1.24457882435595e-08	AKT1/IL1B/PPARG/IL1A/EGF/PON1/SPP1/MIF/NFKBIA/PLA2G10/REN/SYK	12
BP	GO:0032310	prostaglandin secretion	6/137	17/18888	0.352941176470588	48.6595105195363	16.8037471457976	1.51164780977447e-09	2.77490278695689e-08	1.24457882435595e-08	IL1B/IL1A/NOS2/MIF/PLA2G10/PTGS2	6
BP	GO:0030522	intracellular receptor signaling pathway	17/137	369/18888	0.046070460704607	6.35167052400451	8.87408005525275	1.52334177305327e-09	2.78330202459733e-08	1.24834598814891e-08	NR3C1/TNF/AKT1/MAPK1/PPARG/VDR/NR3C2/NFKBIA/PARP1/RELA/MAPK8/HSPA8/PIM1/AR/ESR1/NR1I3/PPARD	17
BP	GO:0006953	acute-phase response	8/137	47/18888	0.170212765957447	23.466997981053	13.1817040643266	1.5450142172164e-09	2.79676184690562e-08	1.25438288785698e-08	TNF/IL6/CRP/IL1B/F2/IL1A/PTGS2/SERPINA1	8
BP	GO:0140353	lipid export from cell	8/137	47/18888	0.170212765957447	23.466997981053	13.1817040643266	1.5450142172164e-09	2.79676184690562e-08	1.25438288785698e-08	IL1B/IL1A/NOS2/SPP1/MIF/PLA2G10/PTGS2/REN	8
BP	GO:0008406	gonad development	14/137	233/18888	0.0600858369098712	8.28395100404123	9.56262018449482	1.58173049867785e-09	2.85003052987575e-08	1.27827456259873e-08	CYP1B1/INSR/MMP2/VEGFA/ACE/NOS3/IL1A/CASP3/BCL2/BAX/BCL2L1/AR/ESR1/REN	14
BP	GO:0048872	homeostasis of number of cells	16/137	322/18888	0.0496894409937888	6.85061431745024	9.05106719772229	1.61625439519544e-09	2.89180231245546e-08	1.29700973281755e-08	IL6/AKT1/VEGFA/IL2/STAT1/NOS3/CASP3/BCL2/BAX/MIF/HIF1A/ADAM17/AXL/PLA2G10/GPI/MAPK14	16
BP	GO:2001236	regulation of extrinsic apoptotic signaling pathway	12/137	157/18888	0.0764331210191083	10.5377283927658	10.2575549438289	1.61970513152876e-09	2.89180231245546e-08	1.29700973281755e-08	TNF/AKT1/IL1B/ICAM1/NOS3/IL1A/BCL2/RELA/BCL2L1/LGALS3/AR/GSTP1	12
BP	GO:0043525	positive regulation of neuron apoptotic process	9/137	69/18888	0.130434782608696	17.9828625833069	12.0799942231067	1.67121230404046e-09	2.97020004945373e-08	1.33217210456048e-08	NR3C1/TP53/TNF/MMP2/CASP8/CASP3/BAX/CASP9/CDC42	9
BP	GO:0090316	positive regulation of intracellular protein transport	10/137	95/18888	0.105263157894737	14.5124855935459	11.2857011691779	1.73152201090905e-09	3.06346201930062e-08	1.37400127181447e-08	CHRM1/IL1B/IFNG/TGFB1/PRKACA/HSP90AA1/CDK1/MAPK14/PTGS2/CDC42	10
BP	GO:1903706	regulation of hemopoiesis	18/137	424/18888	0.0424528301886792	5.85291282192535	8.63877333466278	1.77771737824874e-09	3.13102475178044e-08	1.40430400766354e-08	IL10/TNF/IFNG/TGFB1/IL2/STAT1/CASP8/MYC/HIF1A/NFKBIA/IRF1/FOS/AXL/ERBB2/MAPK14/PNP/PRKCA/SYK	18
BP	GO:0033135	regulation of peptidyl-serine phosphorylation	11/137	126/18888	0.0873015873015873	12.0361487660758	10.6241161405256	1.94721937818929e-09	3.41418285592831e-08	1.53130398114862e-08	PTEN/TNF/IL6/AKT1/EGFR/IFNG/VEGFA/BCL2/BAX/MIF/PTGS2	11
BP	GO:0045137	development of primary sexual characteristics	14/137	238/18888	0.0588235294117647	8.10991841992271	9.43502890269975	2.0826984506623e-09	3.63542452771857e-08	1.63053365545272e-08	CYP1B1/INSR/MMP2/VEGFA/ACE/NOS3/IL1A/CASP3/BCL2/BAX/BCL2L1/AR/ESR1/REN	14
BP	GO:0045936	negative regulation of phosphate metabolic process	17/137	378/18888	0.044973544973545	6.20044027343297	8.72996214027877	2.19203020445082e-09	3.80407173309825e-08	1.70617404962759e-08	TP53/PTEN/TNF/AKT1/IL1B/IFNG/PPARG/TGFB1/IL2/PRKACA/BAX/PARP1/XDH/HSPB1/LGALS3/CDKN1A/GSTP1	17
BP	GO:0002573	myeloid leukocyte differentiation	14/137	239/18888	0.0585774058577406	8.07598570686864	9.40995788714759	2.19877291989822e-09	3.80407173309825e-08	1.70617404962759e-08	NR3C1/TNF/IFNG/PPARG/VEGFA/TGFB1/CASP8/MMP9/MYC/PARP1/FOS/MAPK14/PRKCA/CDC42	14
BP	GO:0010563	negative regulation of phosphorus metabolic process	17/137	379/18888	0.0448548812664908	6.18408027271152	8.71423769467096	2.28104288776709e-09	3.92902100932569e-08	1.76221537260374e-08	TP53/PTEN/TNF/AKT1/IL1B/IFNG/PPARG/TGFB1/IL2/PRKACA/BAX/PARP1/XDH/HSPB1/LGALS3/CDKN1A/GSTP1	17
BP	GO:0071621	granulocyte chemotaxis	11/137	128/18888	0.0859375	11.8480839416058	10.526188953956	2.30383741208307e-09	3.9508790707214e-08	1.77201898824118e-08	IL1B/MAPK1/CXCL8/CCL2/CCL5/CXCL10/S100A9/LGALS3/CXCL11/SYK/TREM1	11
BP	GO:0030098	lymphocyte differentiation	18/137	432/18888	0.0416666666666667	5.74452554744526	8.5269836247993	2.38715149171995e-09	4.07587874787119e-08	1.82808291666534e-08	TP53/IL10/CD40LG/IL6/IL1B/IFNG/TGFB1/IL2/IL1A/BCL2/VCAM1/BAX/IRF1/ADAM17/AXL/ERBB2/PNP/SYK	18
BP	GO:0071248	cellular response to metal ion	13/137	200/18888	0.065	8.9614598540146	9.67510866476971	2.40989051987883e-09	4.09681388379402e-08	1.83747258861242e-08	AKT1/EGFR/MAPK1/MMP9/CHUK/JUN/NCF1/PARP1/FOS/CYP1A1/MAPK8/PTGS2/SCN5A	13
BP	GO:0032722	positive regulation of chemokine production	9/137	72/18888	0.125	17.2335766423358	11.7963152034203	2.46428915124504e-09	4.17115609583035e-08	1.87081600636785e-08	TNF/IL6/IL1B/IFNG/TGFB1/MIF/HIF1A/ADAM17/SYK	9
BP	GO:1990266	neutrophil migration	11/137	129/18888	0.0852713178294574	11.7562383296554	10.478038424769	2.50318575593857e-09	4.21873116625854e-08	1.8921540242258e-08	IL1B/CXCL8/CCL2/IL1A/CCL5/CXCL10/S100A9/LGALS3/CXCL11/SYK/TREM1	11
BP	GO:0043542	endothelial cell migration	15/137	286/18888	0.0524475524475524	7.23087131846256	9.07572933701844	2.59525787498226e-09	4.35513231381144e-08	1.95333165562252e-08	CYP1B1/TNF/AKT1/PPARG/VEGFA/TGFB1/NOS3/EGF/HIF1A/ADAM17/S100A9/HSPB1/GPI/PRKCA/PTGS2	15
BP	GO:0001935	endothelial cell proliferation	13/137	202/18888	0.0643564356435644	8.87273252872732	9.61551536321166	2.72016293319138e-09	4.52588811437374e-08	2.02991778127518e-08	IL10/TNF/AKT1/PPARG/VEGFA/CCL2/STAT1/F3/EGF/HIF1A/ADAM17/XDH/PRKCA	13
BP	GO:0090087	regulation of peptide transport	13/137	202/18888	0.0643564356435644	8.87273252872732	9.61551536321166	2.72016293319138e-09	4.52588811437374e-08	2.02991778127518e-08	CHRM3/TNF/IL6/EGFR/IL1B/IFNG/F2/PRKACA/CCL5/CA2/NOS2/HIF1A/PRKCB	13
BP	GO:0007548	sex differentiation	15/137	288/18888	0.0520833333333333	7.18065693430657	9.03449676587057	2.85371025249443e-09	4.70801986803933e-08	2.11160616507027e-08	CYP1B1/INSR/MMP2/VEGFA/ACE/NOS3/IL1A/CASP3/BCL2/BAX/BCL2L1/AXL/AR/ESR1/REN	15
BP	GO:1903532	positive regulation of secretion by cell	15/137	288/18888	0.0520833333333333	7.18065693430657	9.03449676587057	2.85371025249443e-09	4.70801986803933e-08	2.11160616507027e-08	CHRM3/EGFR/IL1B/IFNG/PPARG/TGFB1/F2/PRKACA/IL1A/SPP1/MIF/HIF1A/PLA2G10/PRKCB/SYK	15
BP	GO:0002697	regulation of immune effector process	17/137	385/18888	0.0441558441558442	6.08770499573419	8.62106200194728	2.88892642723965e-09	4.74609341617943e-08	2.12868263059764e-08	IL10/TNF/CD40LG/IL6/IL1B/IFNG/TGFB1/ICAM1/IL2/NOS2/MIF/NCF1/S100A9/LGALS3/AXL/GPI/SYK	17
BP	GO:0010595	positive regulation of endothelial cell migration	11/137	131/18888	0.083969465648855	11.5767537750042	10.3833121347653	2.94880879612022e-09	4.82420183800421e-08	2.16371524084399e-08	AKT1/VEGFA/TGFB1/NOS3/EGF/HIF1A/ADAM17/HSPB1/GPI/PRKCA/PTGS2	11
BP	GO:0042542	response to hydrogen peroxide	10/137	101/18888	0.099009900990099	13.6503577365036	10.8959307161097	3.17322728842641e-09	5.16971612406136e-08	2.3186827467186e-08	CYP1B1/IL6/MMP2/STAT1/CASP3/BCL2/SOD2/RELA/AXL/CDK1	10
BP	GO:0071674	mononuclear cell migration	13/137	206/18888	0.0631067961165049	8.70044646020835	9.49877036826421	3.45172324028564e-09	5.60009870104433e-08	2.51171474920982e-08	TNF/IL6/AKT1/MAPK1/CCL2/ICAM1/CCL5/CXCL10/ADAM17/CTSG/LGALS3/CXCL11/CDC42	13
BP	GO:0008630	intrinsic apoptotic signaling pathway in response to DNA damage	10/137	102/18888	0.0980392156862745	13.5165306998712	10.8341901260124	3.49663716679138e-09	5.64952533973319e-08	2.53388321873617e-08	TP53/TNF/BCL2/BAX/MIF/SOD2/BCL2L1/CASP9/CDKN1A/E2F1	10
BP	GO:0010543	regulation of platelet activation	8/137	52/18888	0.153846153846154	21.2105558674902	12.4742701801102	3.58663472755576e-09	5.77108715421523e-08	2.58840522248555e-08	IL6/THBD/F2/NOS3/SELP/CTSG/PRKCA/SYK	8
BP	GO:0002757	immune response-activating signaling pathway	19/137	500/18888	0.038	5.23900729927007	8.21129161415971	3.76517848132927e-09	6.03354420573666e-08	2.70612051332811e-08	TNF/AKT1/MAPK1/CHUK/BCL2/BAX/NFKBIA/IRF1/PARP1/CASP1/S100A9/RELA/MAPK8/LGALS3/HSPA8/CTSS/ESR1/PRKCB/SYK	19
BP	GO:0030879	mammary gland development	11/137	135/18888	0.0814814814814815	11.2337388483374	10.1998877980613	4.0585689418139e-09	6.47714471938463e-08	2.90508092677206e-08	NR3C1/AKT1/MAPK1/VEGFA/EGF/VDR/BAX/HIF1A/XDH/AR/ESR1	11
BP	GO:0051897	positive regulation of phosphatidylinositol 3-kinase/protein kinase B signal transduction	12/137	171/18888	0.0701754385964912	9.67499039569727	9.74043818345673	4.29480106942389e-09	6.82628950465341e-08	3.06167675723586e-08	TNF/INSR/EGFR/TGFB1/F2/CCL5/EGF/SELP/NCF1/AXL/PPARD/CDC42	12
BP	GO:0043536	positive regulation of blood vessel endothelial cell migration	9/137	77/18888	0.116883116883117	16.1145132240023	11.3596027088711	4.53016344839875e-09	7.15181722294153e-08	3.20768003591885e-08	AKT1/VEGFA/TGFB1/NOS3/HIF1A/ADAM17/HSPB1/PRKCA/PTGS2	9
BP	GO:0002218	activation of innate immune response	15/137	298/18888	0.0503355704697987	6.93969529221574	8.83409692965115	4.53619097516496e-09	7.15181722294153e-08	3.20768003591885e-08	TNF/AKT1/CHUK/NFKBIA/IRF1/PARP1/CASP1/HSP90AA1/S100A9/RELA/MAPK8/HSPA8/CTSS/ESR1/SYK	15
BP	GO:0051896	regulation of phosphatidylinositol 3-kinase/protein kinase B signal transduction	14/137	253/18888	0.0553359683794466	7.6290932171605	9.0735919555447	4.57649064079456e-09	7.18637686968141e-08	3.22318047244292e-08	PTEN/TNF/INSR/EGFR/TGFB1/F2/CCL5/EGF/SELP/NCF1/XDH/AXL/PPARD/CDC42	14
BP	GO:0043270	positive regulation of monoatomic ion transport	13/137	211/18888	0.0616113744075829	8.4942747431418	9.35721989528722	4.61495216249139e-09	7.21778518213653e-08	3.23726749587817e-08	CHRM1/ABCB1/AKT1/IFNG/CCL2/F2/CCL5/CXCL10/BAX/LGALS3/CXCL11/CTSS/SCN5A	13
BP	GO:0002532	production of molecular mediator involved in inflammatory response	10/137	106/18888	0.0943396226415094	13.0064729376119	10.5956356934957	5.10221843324816e-09	7.90948881630934e-08	3.54750528145682e-08	TNF/IL6/F2/NOS2/HIF1A/NCF1/S100A9/PLA2G10/MAPK14/SYK	10
BP	GO:0070555	response to interleukin-1	11/137	138/18888	0.0797101449275362	10.9895271342431	10.0673089093231	5.12186150394615e-09	7.90948881630934e-08	3.54750528145682e-08	IL6/IL1B/MMP2/CXCL8/CCL2/CCL5/SELE/HIF1A/NFKBIA/RELA/PRKCA	11
BP	GO:0001893	maternal placenta development	7/137	35/18888	0.2	27.5737226277372	13.4501071092912	5.13813339985313e-09	7.90948881630934e-08	3.54750528145682e-08	AKT1/VDR/SPP1/PARP1/CTSB/PPARD/PTGS2	7
BP	GO:0002446	neutrophil mediated immunity	7/137	35/18888	0.2	27.5737226277372	13.4501071092912	5.13813339985313e-09	7.90948881630934e-08	3.54750528145682e-08	IL6/ACE/F2/ADAM17/CTSG/SYK/TREM1	7
BP	GO:0051054	positive regulation of DNA metabolic process	15/137	301/18888	0.0498338870431894	6.87052889395446	8.7757730833966	5.19456045139452e-09	7.96499269213826e-08	3.57239946832746e-08	CYP1B1/TNF/IL6/AKT1/EGFR/MAPK1/TGFB1/IL2/MYC/BAX/PARP1/HSP90AA1/CDK1/CDKN1A/CDC42	15
BP	GO:0030593	neutrophil chemotaxis	10/137	107/18888	0.0934579439252336	12.8849171157651	10.5380012724217	5.59381683937932e-09	8.47887393003245e-08	3.80288167113584e-08	IL1B/CXCL8/CCL2/CCL5/CXCL10/S100A9/LGALS3/CXCL11/SYK/TREM1	10
BP	GO:1901655	cellular response to ketone	10/137	107/18888	0.0934579439252336	12.8849171157651	10.5380012724217	5.59381683937932e-09	8.47887393003245e-08	3.80288167113584e-08	NR3C1/CYP1B1/AKT1/EGFR/ACE/SPP1/NCF1/FOS/CASP9/AR	10
BP	GO:0045860	positive regulation of protein kinase activity	14/137	257/18888	0.0544747081712062	7.51035246669885	8.98219620031524	5.5947556878475e-09	8.47887393003245e-08	3.80288167113584e-08	TNF/INSR/AKT1/EGFR/IL1B/IFNG/VEGFA/CCL5/EGF/NCF1/ADAM17/HSP90AA1/CDKN1A/ERBB2	14
BP	GO:0001776	leukocyte homeostasis	10/137	108/18888	0.0925925925925926	12.7656123276561	10.4811316261991	6.12693248462703e-09	9.24953900188868e-08	4.14853465530934e-08	IL6/AKT1/IL2/CASP3/BCL2/BAX/MIF/HIF1A/ADAM17/AXL	10
BP	GO:0002526	acute inflammatory response	10/137	109/18888	0.0917431192660551	12.6484966182281	10.4250093405089	6.70458024128136e-09	1.00826572090039e-07	4.52219865666994e-08	TNF/IL6/CRP/IL1B/F2/IL1A/F3/GSTP1/PTGS2/SERPINA1	10
BP	GO:0048608	reproductive structure development	15/137	307/18888	0.0488599348534202	6.7362514562876	8.66148552360422	6.7801552110454e-09	1.01572440134818e-07	4.55565177721381e-08	CYP1B1/INSR/MMP2/VEGFA/ACE/NOS3/IL1A/CASP3/BCL2/BAX/BCL2L1/AXL/AR/ESR1/REN	15
BP	GO:0034341	response to type II interferon	11/137	142/18888	0.0774647887323944	10.6799629896165	9.89676184377774	6.92465197207651e-09	1.02948247949883e-07	4.61735848928536e-08	TP53/TNF/IFNG/PPARG/CCL2/STAT1/CCL5/NOS2/IRF1/CASP1/CDC42	11
BP	GO:0062013	positive regulation of small molecule metabolic process	11/137	142/18888	0.0774647887323944	10.6799629896165	9.89676184377774	6.92465197207651e-09	1.02948247949883e-07	4.61735848928536e-08	TNF/INSR/AKT1/IL1B/IFNG/PPARG/NOS3/PRKACA/NOS2/PPARD/PTGS2	11
BP	GO:0015718	monocarboxylic acid transport	12/137	179/18888	0.0670391061452514	9.24258859030298	9.47096885406405	7.20652947773182e-09	1.06733069158831e-07	4.78711248401165e-08	TNF/AKT1/IL1B/PPARG/ACE/IL1A/NOS2/MIF/PLA2G10/PPARD/PTGS2/SYK	12
BP	GO:0046879	hormone secretion	15/137	311/18888	0.0482315112540193	6.64961156617457	8.5869819523438	8.07068835543152e-09	1.1863305063811e-07	5.3208416304507e-08	CHRM3/TNF/IL6/EGFR/IL1B/IFNG/PPARG/F2/PRKACA/CCL5/NOS2/SPP1/HIF1A/PRKCB/REN	15
BP	GO:0061458	reproductive system development	15/137	311/18888	0.0482315112540193	6.64961156617457	8.5869819523438	8.07068835543152e-09	1.1863305063811e-07	5.3208416304507e-08	CYP1B1/INSR/MMP2/VEGFA/ACE/NOS3/IL1A/CASP3/BCL2/BAX/BCL2L1/AXL/AR/ESR1/REN	15
BP	GO:0051047	positive regulation of secretion	15/137	312/18888	0.0480769230769231	6.62829870859068	8.56856096689813	8.42656695083025e-09	1.23400287557102e-07	5.53465820622243e-08	CHRM3/EGFR/IL1B/IFNG/PPARG/TGFB1/F2/PRKACA/IL1A/SPP1/MIF/HIF1A/PLA2G10/PRKCB/SYK	15
BP	GO:0002443	leukocyte mediated immunity	18/137	469/18888	0.0383795309168444	5.29133270041866	8.04405701716719	8.61282888716064e-09	1.25657316973127e-07	5.63588881618603e-08	IL10/TNF/CD40LG/IL6/IL1B/TGFB1/ACE/F2/ICAM1/IL2/C1S/NOS2/ADAM17/CTSG/C1R/SYK/TREM1/HPRT1	18
BP	GO:0010888	negative regulation of lipid storage	6/137	22/18888	0.272727272727273	37.6005308560053	14.6821063869998	8.84599239010196e-09	1.28579294592188e-07	5.76694318994712e-08	TNF/IL6/CRP/PPARG/NFKBIA/PPARD	6
BP	GO:0045859	regulation of protein kinase activity	18/137	470/18888	0.0382978723404255	5.28007454573692	8.03172045945327	8.90155923775144e-09	1.28907765257808e-07	5.78167551270717e-08	PTEN/TNF/INSR/AKT1/EGFR/IL1B/IFNG/PPARG/VEGFA/CCL5/EGF/NCF1/ADAM17/HSP90AA1/HSPB1/CDKN1A/ERBB2/GSTP1	18
BP	GO:0071900	regulation of protein serine/threonine kinase activity	14/137	267/18888	0.052434456928839	7.2290658574592	8.76206781208423	9.10366099264667e-09	1.31348023916046e-07	5.89112418479291e-08	PTEN/TNF/INSR/AKT1/EGFR/IL1B/IFNG/PPARG/VEGFA/EGF/ADAM17/CDKN1A/ERBB2/GSTP1	14
BP	GO:0043534	blood vessel endothelial cell migration	12/137	183/18888	0.0655737704918033	9.04056479597942	9.34249343912835	9.24463675826388e-09	1.32891653400043e-07	5.96035790993329e-08	CYP1B1/TNF/AKT1/PPARG/VEGFA/TGFB1/NOS3/HIF1A/ADAM17/HSPB1/PRKCA/PTGS2	12
BP	GO:0045089	positive regulation of innate immune response	16/137	365/18888	0.0438356164383562	6.04355564443556	8.31681693904958	9.66393619116427e-09	1.38410221639019e-07	6.20787264101781e-08	TNF/AKT1/CCL5/CHUK/NFKBIA/IRF1/PARP1/CASP1/HSP90AA1/S100A9/RELA/MAPK8/HSPA8/CTSS/ESR1/SYK	16
BP	GO:2001243	negative regulation of intrinsic apoptotic signaling pathway	10/137	114/18888	0.087719298245614	12.0937379946216	10.1550363074771	1.03796515259569e-08	1.48118384914202e-07	6.64329598242187e-08	IL10/AKT1/MMP9/BCL2/MIF/HIF1A/SOD2/HSPB1/BCL2L1/PTGS2	10
BP	GO:0033559	unsaturated fatty acid metabolic process	10/137	115/18888	0.0869565217391304	11.9885750555379	10.1030619458589	1.12987043383754e-08	1.60647032592902e-07	7.20522159913243e-08	CYP1B1/CYP2C9/IL1B/MIF/GSTM1/CYP1A1/PTGS1/PLA2G10/GSTP1/PTGS2	10
BP	GO:0046456	icosanoid biosynthetic process	8/137	60/18888	0.133333333333333	18.3824817518248	11.5269622091121	1.16152896726039e-08	1.64549937028555e-07	7.38027177519379e-08	CYP2C9/IL1B/MIF/CASP1/PTGS1/PLA2G10/PTGS2/SYK	8
BP	GO:0045766	positive regulation of angiogenesis	12/137	187/18888	0.0641711229946524	8.84718373082478	9.21789519729755	1.17869917664528e-08	1.66379558869424e-07	7.46233261748448e-08	CYP1B1/IL10/IL1B/VEGFA/CXCL8/NOS3/IL1A/F3/HIF1A/HSPB1/PRKCA/PRKCB	12
BP	GO:0071241	cellular response to inorganic substance	13/137	229/18888	0.0567685589519651	7.82660249258917	8.88398324135209	1.23450673071767e-08	1.73630263205256e-07	7.78753583254694e-08	AKT1/EGFR/MAPK1/MMP9/CHUK/JUN/NCF1/PARP1/FOS/CYP1A1/MAPK8/PTGS2/SCN5A	13
BP	GO:0009914	hormone transport	15/137	322/18888	0.046583850931677	6.4224509226096	8.38868621548102	1.28608270405195e-08	1.80235963184342e-07	8.08380979041899e-08	CHRM3/TNF/IL6/EGFR/IL1B/IFNG/PPARG/F2/PRKACA/CCL5/NOS2/SPP1/HIF1A/PRKCB/REN	15
BP	GO:0051091	positive regulation of DNA-binding transcription factor activity	13/137	230/18888	0.0565217391304348	7.79257378609965	8.85921609593359	1.30045572867395e-08	1.81599353539827e-07	8.14495956380001e-08	PTEN/IL10/TNF/CD40LG/IL6/AKT1/IL1B/PPARG/CHUK/S100A9/RELA/AR/ESR1	13
BP	GO:0010574	regulation of vascular endothelial growth factor production	8/137	61/18888	0.131147540983607	18.0811295919588	11.421430480417	1.32874790558532e-08	1.84889833125929e-07	8.29254171457256e-08	CYP1B1/IL6/IL1B/TGFB1/IL1A/HIF1A/RELA/PTGS2	8
BP	GO:0034103	regulation of tissue remodeling	9/137	87/18888	0.103448275862069	14.2622703246917	10.5978211079002	1.35492577712455e-08	1.87199992528515e-07	8.39615527130183e-08	TP53/IL6/EGFR/PPARG/TGFB1/IL2/SPP1/PRKCA/SYK	9
BP	GO:0098586	cellular response to virus	9/137	87/18888	0.103448275862069	14.2622703246917	10.5978211079002	1.35492577712455e-08	1.87199992528515e-07	8.39615527130183e-08	IL6/IFNG/CCL5/CHUK/CXCL10/BAX/HIF1A/HSP90AA1/MAPK14	9
BP	GO:0048708	astrocyte differentiation	9/137	88/18888	0.102272727272727	14.100199071002	10.5285815059833	1.50008665920035e-08	2.06526015403991e-07	9.26295172063668e-08	NR3C1/TNF/IL6/EGFR/IL1B/MAPK1/IFNG/F2/S100A9	9
BP	GO:0046824	positive regulation of nucleocytoplasmic transport	8/137	62/18888	0.129032258064516	17.7894984695079	11.3183754889523	1.51634908733648e-08	2.0689335877988e-07	9.27942753337675e-08	IL1B/IFNG/TGFB1/PRKACA/HSP90AA1/CDK1/MAPK14/PTGS2	8
BP	GO:0071715	icosanoid transport	8/137	62/18888	0.129032258064516	17.7894984695079	11.3183754889523	1.51634908733648e-08	2.0689335877988e-07	9.27942753337675e-08	IL1B/ACE/IL1A/NOS2/MIF/PLA2G10/PTGS2/SYK	8
BP	GO:0002758	innate immune response-activating signaling pathway	14/137	278/18888	0.0503597122302158	6.94302368324319	8.53269513860767	1.51862900178582e-08	2.0689335877988e-07	9.27942753337675e-08	TNF/AKT1/CHUK/NFKBIA/IRF1/PARP1/CASP1/S100A9/RELA/MAPK8/HSPA8/CTSS/ESR1/SYK	14
BP	GO:1990748	cellular detoxification	10/137	119/18888	0.0840336134453782	11.5855977427467	9.90142852874535	1.57366077081932e-08	2.13646306038317e-07	9.58230571705038e-08	NOS3/MPO/GSTM1/S100A9/SOD2/PTGS1/PIM1/DUOX2/GSTP1/PTGS2	10
BP	GO:0010594	regulation of endothelial cell migration	13/137	234/18888	0.0555555555555556	7.65936739659367	8.76162123827626	1.59730363307853e-08	2.16105785651802e-07	9.69261647317006e-08	TNF/AKT1/PPARG/VEGFA/TGFB1/NOS3/EGF/HIF1A/ADAM17/HSPB1/GPI/PRKCA/PTGS2	13
BP	GO:0046660	female sex differentiation	10/137	121/18888	0.0826446280991736	11.3941002593955	9.80418994478262	1.84857462833206e-08	2.48704574354811e-07	1.11547131747238e-07	INSR/MMP2/VEGFA/NOS3/CASP3/BCL2/BAX/BCL2L1/AXL/ESR1	10
BP	GO:0043535	regulation of blood vessel endothelial cell migration	11/137	156/18888	0.0705128205128205	9.72150477259966	9.34956067231435	1.85401388262818e-08	2.48704574354811e-07	1.11547131747238e-07	TNF/AKT1/PPARG/VEGFA/TGFB1/NOS3/HIF1A/ADAM17/HSPB1/PRKCA/PTGS2	11
BP	GO:0062012	regulation of small molecule metabolic process	15/137	331/18888	0.0453172205438066	6.2478223476746	8.23320244736549	1.85733339415869e-08	2.48704574354811e-07	1.11547131747238e-07	NR3C1/TP53/TNF/INSR/AKT1/IL1B/IFNG/PPARG/NOS3/PRKACA/NOS2/HIF1A/PARP1/PPARD/PTGS2	15
BP	GO:0051098	regulation of binding	13/137	238/18888	0.0546218487394958	7.53063853278538	8.66631087316815	1.95406730575143e-08	2.6076461315659e-07	1.16956210935221e-07	IL10/AKT1/IFNG/PPARG/PRKACA/MMP9/EGF/PON1/BAX/JUN/MAPK8/CDKN1A/E2F1	13
BP	GO:1904892	regulation of receptor signaling pathway via STAT	10/137	122/18888	0.0819672131147541	11.3007059949743	9.75642269549648	2.00131887124469e-08	2.66161795461453e-07	1.19376915126876e-07	CYP1B1/IL10/TNF/IL6/IFNG/PPARG/TGFB1/F2/CCL5/EGF	10
BP	GO:0046697	decidualization	6/137	25/18888	0.24	33.0884671532847	13.7228131618983	2.06248206733386e-08	2.73366267229674e-07	1.22608211389053e-07	VDR/SPP1/PARP1/CTSB/PPARD/PTGS2	6
BP	GO:0090276	regulation of peptide hormone secretion	12/137	197/18888	0.0609137055837563	8.39808810997073	8.92207563477343	2.11023463223752e-08	2.78667901965023e-07	1.24986061293237e-07	CHRM3/TNF/IL6/EGFR/IL1B/IFNG/F2/PRKACA/CCL5/NOS2/HIF1A/PRKCB	12
BP	GO:0098754	detoxification	11/137	158/18888	0.069620253164557	9.59844775016169	9.27703656102213	2.11673572592357e-08	2.78667901965023e-07	1.24986061293237e-07	ABCB1/NOS3/MPO/GSTM1/S100A9/SOD2/PTGS1/PIM1/DUOX2/GSTP1/PTGS2	11
BP	GO:0071482	cellular response to light stimulus	10/137	123/18888	0.0813008130081301	11.2088303364785	9.70920820838602	2.16511254872255e-08	2.84080203540442e-07	1.27413546668024e-07	TP53/MMP2/MMP9/MYC/BAX/PARP1/MME/CASP9/CDKN1A/MAPK14	10
BP	GO:0060562	epithelial tube morphogenesis	15/137	335/18888	0.0447761194029851	6.17322148382177	8.16593578745694	2.17871168419489e-08	2.84908451010101e-07	1.27785026082334e-07	NR3C1/TNF/VEGFA/TGFB1/PRKACA/CASP3/EGF/BCL2/VDR/CXCL10/MYC/HIF1A/APAF1/AR/ESR1	15
BP	GO:0033138	positive regulation of peptidyl-serine phosphorylation	9/137	93/18888	0.0967741935483871	13.3421238521309	10.1985813934691	2.44929949732621e-08	3.18164818423438e-07	1.42700925425615e-07	TNF/IL6/AKT1/EGFR/IFNG/VEGFA/BCL2/MIF/PTGS2	9
BP	GO:1904705	regulation of vascular associated smooth muscle cell proliferation	9/137	93/18888	0.0967741935483871	13.3421238521309	10.1985813934691	2.44929949732621e-08	3.18164818423438e-07	1.42700925425615e-07	PTEN/IL10/TNF/MMP2/PPARG/MMP9/JUN/SOD2/CDKN1A	9
BP	GO:0002791	regulation of peptide secretion	12/137	200/18888	0.06	8.27211678832117	8.83738930297122	2.49668709582716e-08	3.22179753949974e-07	1.44501674540492e-07	CHRM3/TNF/IL6/EGFR/IL1B/IFNG/F2/PRKACA/CCL5/NOS2/HIF1A/PRKCB	12
BP	GO:0031099	regeneration	12/137	200/18888	0.06	8.27211678832117	8.83738930297122	2.49668709582716e-08	3.22179753949974e-07	1.44501674540492e-07	IL10/TNF/IL6/EGFR/MMP2/ACE/BCL2/SPP1/AXL/CDK1/CDKN1A/PPARD	12
BP	GO:0031100	animal organ regeneration	8/137	66/18888	0.121212121212121	16.7113470471135	10.9290411682319	2.5139638369694e-08	3.2334205929442e-07	1.45022983116033e-07	IL10/TNF/IL6/EGFR/ACE/AXL/CDK1/CDKN1A	8
BP	GO:0006606	protein import into nucleus	11/137	161/18888	0.0683229813664596	9.41959468649408	9.1706385160363	2.5731852933569e-08	3.28795898595604e-07	1.47469098683612e-07	TP53/AKT1/IFNG/TGFB1/NFKBIA/HSP90AA1/CDK1/CDKN1A/MAPK14/PTGS2/SYK	11
BP	GO:0036294	cellular response to decreased oxygen levels	11/137	161/18888	0.0683229813664596	9.41959468649408	9.1706385160363	2.5731852933569e-08	3.28795898595604e-07	1.47469098683612e-07	TP53/AKT1/PPARG/VEGFA/TGFB1/BCL2/MYC/HIF1A/FOS/PPARD/PTGS2	11
BP	GO:1900182	positive regulation of protein localization to nucleus	9/137	94/18888	0.0957446808510638	13.2001863643423	10.135620405192	2.69213230057233e-08	3.42874178997975e-07	1.53783384630671e-07	AKT1/IFNG/TGFB1/F2/PARP1/HSP90AA1/CDK1/MAPK14/PTGS2	9
BP	GO:0010959	regulation of metal ion transport	16/137	394/18888	0.0406091370558376	5.59872540664715	7.88496408280746	2.82005915841626e-08	3.57895305247373e-07	1.60520548806602e-07	AKT1/IFNG/ACE/CCL2/F2/NOS3/PRKACA/CCL5/EGF/BCL2/CXCL10/BAX/LGALS3/CXCL11/PTGS2/SCN5A	16
BP	GO:0061180	mammary gland epithelium development	8/137	67/18888	0.119402985074627	16.461923956858	10.8370017592387	2.83753311065692e-08	3.57895305247373e-07	1.60520548806602e-07	NR3C1/AKT1/MAPK1/VDR/BAX/HIF1A/AR/ESR1	8
BP	GO:0097192	extrinsic apoptotic signaling pathway in absence of ligand	8/137	67/18888	0.119402985074627	16.461923956858	10.8370017592387	2.83753311065692e-08	3.57895305247373e-07	1.60520548806602e-07	TNF/AKT1/IL1B/IL2/IL1A/BCL2/BAX/BCL2L1	8
BP	GO:0071902	positive regulation of protein serine/threonine kinase activity	10/137	127/18888	0.078740157480315	10.8557963101328	9.52566150844415	2.94503335874087e-08	3.70259820986392e-07	1.66066189733027e-07	TNF/INSR/AKT1/EGFR/IL1B/IFNG/VEGFA/EGF/ADAM17/ERBB2	10
BP	GO:1990874	vascular associated smooth muscle cell proliferation	9/137	95/18888	0.0947368421052632	13.0612370341913	10.0736105105282	2.95574649702968e-08	3.70415666775195e-07	1.66136088530751e-07	PTEN/IL10/TNF/MMP2/PPARG/MMP9/JUN/SOD2/CDKN1A	9
BP	GO:0051924	regulation of calcium ion transport	13/137	247/18888	0.0526315789473684	7.25624279677295	8.45974018118152	3.03300884278413e-08	3.78883852245558e-07	1.69934176293202e-07	ACE/CCL2/F2/NOS3/PRKACA/CCL5/EGF/BCL2/CXCL10/BAX/LGALS3/CXCL11/PTGS2	13
BP	GO:0006869	lipid transport	17/137	456/18888	0.037280701754386	5.13983864771418	7.6490792736709	3.5231747450225e-08	4.38307834179914e-07	1.96586580089847e-07	ABCB1/AKT1/IL1B/PPARG/ACE/IL1A/EGF/PON1/NOS2/SPP1/MIF/NFKBIA/PLA2G10/PPARD/PTGS2/REN/SYK	17
BP	GO:0051170	import into nucleus	11/137	166/18888	0.0662650602409639	9.13587195497318	8.99935917353839	3.53112449531133e-08	4.38307834179914e-07	1.96586580089847e-07	TP53/AKT1/IFNG/TGFB1/NFKBIA/HSP90AA1/CDK1/CDKN1A/MAPK14/PTGS2/SYK	11
BP	GO:0070141	response to UV-A	5/137	14/18888	0.357142857142857	49.2387904066736	15.4332719368169	3.54396359233764e-08	4.38509419178487e-07	1.96676993498818e-07	AKT1/EGFR/MMP2/MMP9/MME	5
BP	GO:0038034	signal transduction in absence of ligand	8/137	69/18888	0.115942028985507	15.9847667407172	10.6587387594123	3.5936549020106e-08	4.43255226083957e-07	1.98805547625757e-07	TNF/AKT1/IL1B/IL2/IL1A/BCL2/BAX/BCL2L1	8
BP	GO:0050796	regulation of insulin secretion	11/137	167/18888	0.0658682634730539	9.08116613488352	8.96597050748241	3.7569765349182e-08	4.61942712312269e-07	2.07187120396349e-07	CHRM3/TNF/IL6/IL1B/IFNG/F2/PRKACA/CCL5/NOS2/HIF1A/PRKCB	11
BP	GO:0015732	prostaglandin transport	6/137	28/18888	0.214285714285714	29.5432742440042	12.9193754229197	4.30977716603727e-08	5.24960396236938e-07	2.35451344765308e-07	IL1B/IL1A/NOS2/MIF/PLA2G10/PTGS2	6
BP	GO:0032770	positive regulation of monooxygenase activity	6/137	28/18888	0.214285714285714	29.5432742440042	12.9193754229197	4.30977716603727e-08	5.24960396236938e-07	2.35451344765308e-07	TNF/AKT1/IL1B/IFNG/VDR/HIF1A	6
BP	GO:0090594	inflammatory response to wounding	6/137	28/18888	0.214285714285714	29.5432742440042	12.9193754229197	4.30977716603727e-08	5.24960396236938e-07	2.35451344765308e-07	TNF/IL6/PPARG/TGFB1/IL1A/HIF1A	6
BP	GO:1902175	regulation of oxidative stress-induced intrinsic apoptotic signaling pathway	7/137	47/18888	0.148936170212766	20.5336232334213	11.4606517962106	4.46990136677346e-08	5.42773737393919e-07	2.43440852469584e-07	IL10/AKT1/MMP2/HIF1A/PARP1/SOD2/HSPB1	7
BP	GO:0021782	glial cell development	10/137	133/18888	0.075187969924812	10.3660611382471	9.26517936882239	4.58032003862282e-08	5.54459794149078e-07	2.4868219600279e-07	PTEN/TNF/IL6/AKT1/EGFR/IL1B/MAPK1/IFNG/S100A9/ERBB2	10
BP	GO:0034764	positive regulation of transmembrane transport	12/137	213/18888	0.0563380281690141	7.76724581063021	8.4898693155662	5.01148863369795e-08	6.0292063254643e-07	2.70417491943021e-07	ABCB1/INSR/AKT1/IFNG/CCL2/F2/CA2/CXCL10/BAX/CXCL11/CTSS/MAPK14	12
BP	GO:0071383	cellular response to steroid hormone stimulus	12/137	213/18888	0.0563380281690141	7.76724581063021	8.4898693155662	5.01148863369795e-08	6.0292063254643e-07	2.70417491943021e-07	NR3C1/CYP1B1/EGFR/MAPK1/ACE/NR3C2/PARP1/CASP9/HSPA8/AR/ESR1/PPARD	12
BP	GO:0051341	regulation of oxidoreductase activity	8/137	72/18888	0.111111111111111	15.3187347931873	10.4048733471416	5.05116431287461e-08	6.05526357225871e-07	2.71586192256913e-07	TNF/AKT1/EGFR/IL1B/IFNG/IL1A/VDR/HIF1A	8
BP	GO:0032755	positive regulation of interleukin-6 production	9/137	101/18888	0.0891089108910891	12.2853219628532	9.72020624060435	5.06412068575089e-08	6.05526357225871e-07	2.71586192256913e-07	TNF/IL6/IL1B/IFNG/TGFB1/IL1A/NOS2/RELA/SYK	9
BP	GO:0051607	defense response to virus	14/137	307/18888	0.0456026058631922	6.28716802586842	7.98338944272154	5.26468311296686e-08	6.27588749137208e-07	2.81481452702272e-07	TNF/IL6/IL1B/IFNG/STAT1/BCL2/CXCL10/IRF1/CASP1/HSP90AA1/RELA/BCL2L1/PLA2G10/ISG20	14
BP	GO:0002221	pattern recognition receptor signaling pathway	13/137	259/18888	0.0501930501930502	6.92004621931629	8.19992282380172	5.30007150716946e-08	6.29886917721355e-07	2.8251221023658e-07	TNF/AKT1/CHUK/NFKBIA/IRF1/PARP1/CASP1/S100A9/RELA/MAPK8/HSPA8/CTSS/ESR1	13
BP	GO:2000273	positive regulation of signaling receptor activity	6/137	29/18888	0.206896551724138	28.5245406493833	12.679125640389	5.40180898833049e-08	6.40032519526431e-07	2.87062640336797e-07	IL10/IFNG/CCL2/HIF1A/NCF1/ADAM17	6
BP	GO:0008585	female gonad development	9/137	102/18888	0.0882352941176471	12.1648776298841	9.66421206293783	5.52035845695136e-08	6.50138601406019e-07	2.91595345253043e-07	INSR/MMP2/VEGFA/NOS3/CASP3/BCL2/BAX/BCL2L1/ESR1	9
BP	GO:0032677	regulation of interleukin-8 production	9/137	102/18888	0.0882352941176471	12.1648776298841	9.66421206293783	5.52035845695136e-08	6.50138601406019e-07	2.91595345253043e-07	IL10/TNF/IL6/CRP/IL1B/F3/NOS2/RELA/SYK	9
BP	GO:0007259	receptor signaling pathway via JAK-STAT	11/137	174/18888	0.0632183908045977	8.71583186508935	8.73984285194075	5.73239518040093e-08	6.73083037698728e-07	3.01886213704693e-07	CYP1B1/IL10/TNF/IL6/IFNG/CCL2/F2/IL2/STAT1/CCL5/EGF	11
BP	GO:0032637	interleukin-8 production	9/137	103/18888	0.087378640776699	12.0467720218269	9.60899485426906	6.01205179704396e-08	7.03806063665925e-07	3.1566587752522e-07	IL10/TNF/IL6/CRP/IL1B/F3/NOS2/RELA/SYK	9
BP	GO:0044403	biological process involved in symbiotic interaction	14/137	311/18888	0.045016077170418	6.2063041284296	7.91318820162876	6.18199295482952e-08	7.21540073235326e-07	3.23619804014013e-07	INSR/AKT1/EGFR/CXCL8/F2/ICAM1/CCL5/JUN/CTSB/CTSG/AXL/CDK1/TREM1/CDC42	14
BP	GO:0014823	response to activity	8/137	74/18888	0.108108108108108	14.904714933912	10.2439378867655	6.28359539199983e-08	7.31216011390457e-07	3.27959584056132e-07	IL10/TNF/IL6/MMP2/HIF1A/FOS/SOD2/CDK1	8
BP	GO:0042886	amide transport	14/137	312/18888	0.0448717948717949	6.18641212801797	7.89583	6.43283425562296e-08	7.4636148188385e-07	3.34752518190468e-07	CHRM3/ABCB1/TNF/IL6/EGFR/IL1B/IFNG/F2/PRKACA/CCL5/CA2/NOS2/HIF1A/PRKCB	14
BP	GO:0009408	response to heat	9/137	104/18888	0.0865384615384615	11.9309376754632	9.55453608099683	6.54151838295318e-08	7.54493713196075e-07	3.38399926284738e-07	AKT1/NOS3/PRKACA/IL1A/CXCL10/HSP90AA1/HSPB1/CDKN1A/PTGS2	9
BP	GO:0042102	positive regulation of T cell proliferation	9/137	104/18888	0.0865384615384615	11.9309376754632	9.55453608099683	6.54151838295318e-08	7.54493713196075e-07	3.38399926284738e-07	CD40LG/IL6/IL1B/IL2/IL1A/CCL5/VCAM1/PNP/SYK	9
BP	GO:0001959	regulation of cytokine-mediated signaling pathway	11/137	177/18888	0.0621468926553672	8.56810590127428	8.64678959309977	6.8300687015421e-08	7.80864579620749e-07	3.50227591774981e-07	IL6/PPARG/CASP8/CCL5/HIF1A/CASP1/ADAM17/AXL/BIRC7/GSTP1/SYK	11
BP	GO:0002262	myeloid cell homeostasis	11/137	177/18888	0.0621468926553672	8.56810590127428	8.64678959309977	6.8300687015421e-08	7.80864579620749e-07	3.50227591774981e-07	IL6/VEGFA/STAT1/CASP3/BAX/HIF1A/ADAM17/AXL/PLA2G10/GPI/MAPK14	11
BP	GO:0071453	cellular response to oxygen levels	11/137	177/18888	0.0621468926553672	8.56810590127428	8.64678959309977	6.8300687015421e-08	7.80864579620749e-07	3.50227591774981e-07	TP53/AKT1/PPARG/VEGFA/TGFB1/BCL2/MYC/HIF1A/FOS/PPARD/PTGS2	11
BP	GO:0006693	prostaglandin metabolic process	7/137	50/18888	0.14	19.3016058394161	11.0760870533422	6.97183836606619e-08	7.92438604980198e-07	3.55418687817205e-07	IL1B/MIF/GSTM1/PTGS1/PLA2G10/GSTP1/PTGS2	7
BP	GO:0035094	response to nicotine	7/137	50/18888	0.14	19.3016058394161	11.0760870533422	6.97183836606619e-08	7.92438604980198e-07	3.55418687817205e-07	TNF/MAPK1/MMP2/CASP3/BCL2/VCAM1/RELA	7
BP	GO:0045639	positive regulation of myeloid cell differentiation	9/137	105/18888	0.0857142857142857	11.8173096976017	9.50081782605702	7.11119857242028e-08	8.05935838207632e-07	3.61472366793354e-07	TNF/IFNG/TGFB1/STAT1/CASP8/HIF1A/FOS/MAPK14/PRKCA	9
BP	GO:0032388	positive regulation of intracellular transport	10/137	140/18888	0.0714285714285714	9.84775808133472	8.98150966812844	7.45988128256872e-08	8.43009705631321e-07	3.78100462937618e-07	CHRM1/IL1B/IFNG/TGFB1/PRKACA/HSP90AA1/CDK1/MAPK14/PTGS2/CDC42	10
BP	GO:0034349	glial cell apoptotic process	5/137	16/18888	0.3125	43.0839416058394	14.3945135724099	7.64256484589664e-08	8.60869103244067e-07	3.86110627541962e-07	TP53/CCL2/CASP3/CASP9/PRKCA	5
BP	GO:1903034	regulation of response to wounding	11/137	179/18888	0.0614525139664804	8.4723728744444	8.58596907809693	7.66195518999835e-08	8.60869103244067e-07	3.86110627541962e-07	PTEN/IL10/TNF/THBD/F2/NOS3/F3/PLAT/SPP1/CLDN4/DUOX2	11
BP	GO:0046545	development of primary female sexual characteristics	9/137	106/18888	0.0849056603773585	11.7058256438507	9.44782276275122	7.72366033078998e-08	8.65315527031198e-07	3.88104904572345e-07	INSR/MMP2/VEGFA/NOS3/CASP3/BCL2/BAX/BCL2L1/ESR1	9
BP	GO:0006692	prostanoid metabolic process	7/137	51/18888	0.137254901960784	18.9231429798197	10.9552664638688	8.03241821210939e-08	8.96519599655616e-07	4.02100323872999e-07	IL1B/MIF/GSTM1/PTGS1/PLA2G10/GSTP1/PTGS2	7
BP	GO:0009306	protein secretion	15/137	370/18888	0.0405405405405405	5.58926810021701	7.62038315688333	8.04804039588545e-08	8.96519599655616e-07	4.02100323872999e-07	CHRM3/TNF/IL6/EGFR/IL1B/IFNG/PPARG/TGFB1/F2/PRKACA/IL1A/CCL5/NOS2/HIF1A/PRKCB	15
BP	GO:0031668	cellular response to extracellular stimulus	13/137	269/18888	0.0483271375464684	6.66279543049413	7.99573503314809	8.25117601464747e-08	9.1384711930997e-07	4.09871934518888e-07	TP53/MAPK1/BCL2/VDR/VCAM1/HSPA5/FOS/MAPK8/AXL/HSPA8/PIM1/CDKN1A/PPARD	13
BP	GO:0032868	response to insulin	13/137	269/18888	0.0483271375464684	6.66279543049413	7.99573503314809	8.25117601464747e-08	9.1384711930997e-07	4.09871934518888e-07	IL10/INSR/AKT1/IL1B/MAPK1/PPARG/STAT1/PARP1/FOS/RELA/CTSD/MAPK14/PRKCB	13
BP	GO:2000191	regulation of fatty acid transport	6/137	31/18888	0.193548387096774	26.6842477042618	12.2332246991425	8.27370537687288e-08	9.1384711930997e-07	4.09871934518888e-07	AKT1/IL1B/IL1A/MIF/PLA2G10/SYK	6
BP	GO:0035592	establishment of protein localization to extracellular region	15/137	371/18888	0.0404312668463612	5.57420268754796	7.60582980609103	8.33591012024419e-08	9.18124185074783e-07	4.11790252344754e-07	CHRM3/TNF/IL6/EGFR/IL1B/IFNG/PPARG/TGFB1/F2/PRKACA/IL1A/CCL5/NOS2/HIF1A/PRKCB	15
BP	GO:0050921	positive regulation of chemotaxis	10/137	142/18888	0.0704225352112676	9.70905726328776	8.90411107057302	8.53237899249667e-08	9.37123647771404e-07	4.20311750487861e-07	IL6/MAPK1/VEGFA/CXCL8/TGFB1/F3/CCL5/CXCL10/ADAM17/HSPB1	10
BP	GO:0071478	cellular response to radiation	11/137	181/18888	0.0607734806629834	8.37875549461628	8.52608956992978	8.58266847133175e-08	9.40006546860144e-07	4.21604767012788e-07	TP53/MMP2/MMP9/MYC/BAX/PARP1/MME/BCL2L1/CASP9/CDKN1A/MAPK14	11
BP	GO:0016032	viral process	16/137	428/18888	0.0373831775700935	5.15396684630602	7.43016775207049	8.829038613163e-08	9.64288854119199e-07	4.32495687431037e-07	TP53/TNF/INSR/AKT1/EGFR/CXCL8/CCL2/ICAM1/STAT1/CCL5/BCL2/JUN/CTSB/AXL/CDK1/ISG20	16
BP	GO:0015833	peptide transport	13/137	271/18888	0.0479704797047971	6.61362350849786	7.95614400404564	8.99418404389019e-08	9.79589404223138e-07	4.39358176722506e-07	CHRM3/TNF/IL6/EGFR/IL1B/IFNG/F2/PRKACA/CCL5/CA2/NOS2/HIF1A/PRKCB	13
BP	GO:0001676	long-chain fatty acid metabolic process	9/137	109/18888	0.0825688073394495	11.3836469564053	9.29301179859365	9.84543590948562e-08	1.06932373350247e-06	4.79605152783715e-07	CYP3A4/CYP1B1/CYP2C9/GSTM1/CYP1A1/PTGS1/PLA2G10/GSTP1/PTGS2	9
BP	GO:1904894	positive regulation of receptor signaling pathway via STAT	7/137	53/18888	0.132075471698113	18.2090621126567	10.7236314925334	1.05661948607736e-07	1.1444271996018e-06	5.13290002567396e-07	CYP1B1/IL10/TNF/IL6/TGFB1/F2/CCL5	7
BP	GO:0071347	cellular response to interleukin-1	9/137	110/18888	0.0818181818181818	11.2801592568016	9.24274719932175	1.06574355218914e-07	1.14858427403762e-06	5.15154502772024e-07	IL6/IL1B/MMP2/CXCL8/CCL2/CCL5/HIF1A/NFKBIA/RELA	9
BP	GO:0003018	vascular process in circulatory system	13/137	275/18888	0.0472727272727273	6.51742534837425	7.87814882727834	1.0663327147715e-07	1.14858427403762e-06	5.15154502772024e-07	CHRM3/ABCB1/TNF/INSR/CRP/EGFR/MMP2/VEGFA/TGFB1/ACE/NOS3/SOD2/PTGS2	13
BP	GO:0035821	modulation of process of another organism	5/137	17/18888	0.294117647058824	40.5495920996136	13.9443594387928	1.0763981539613e-07	1.15624087417271e-06	5.18588584297142e-07	AKT1/IFNG/NOS2/S100A9/SYK	5
BP	GO:0071692	protein localization to extracellular region	15/137	379/18888	0.0395778364116095	5.4565414170984	7.49127312112945	1.09978012054097e-07	1.17812062227814e-06	5.28401926696831e-07	CHRM3/TNF/IL6/EGFR/IL1B/IFNG/PPARG/TGFB1/F2/PRKACA/IL1A/CCL5/NOS2/HIF1A/PRKCB	15
BP	GO:0050920	regulation of chemotaxis	12/137	229/18888	0.0524017467248908	7.22455614700539	8.10049399461627	1.10788455536475e-07	1.18355972991152e-06	5.3084143492599e-07	IL6/MAPK1/VEGFA/CXCL8/TGFB1/CCL2/F3/CCL5/CXCL10/MIF/ADAM17/HSPB1	12
BP	GO:1902105	regulation of leukocyte differentiation	14/137	328/18888	0.0426829268292683	5.88463592665124	7.62798257214031	1.19177306275321e-07	1.26756617320186e-06	5.68519382031042e-07	IL10/TNF/IFNG/TGFB1/IL2/CASP8/MYC/IRF1/FOS/AXL/ERBB2/PNP/PRKCA/SYK	14
BP	GO:0002700	regulation of production of molecular mediator of immune response	11/137	187/18888	0.0588235294117647	8.10991841992271	8.35184763149346	1.19624531435163e-07	1.26756617320186e-06	5.68519382031042e-07	IL10/TNF/CD40LG/IL6/IL1B/TGFB1/IL2/MIF/AXL/GPI/SYK	11
BP	GO:0008217	regulation of blood pressure	11/137	187/18888	0.0588235294117647	8.10991841992271	8.35184763149346	1.19624531435163e-07	1.26756617320186e-06	5.68519382031042e-07	TNF/PPARG/ACE/NOS3/NOS2/SOD2/PTGS1/CTSG/AR/PTGS2/REN	11
BP	GO:0010883	regulation of lipid storage	7/137	54/18888	0.12962962962963	17.8718572587186	10.6125083797483	1.20669204943774e-07	1.27517997656799e-06	5.71934268666649e-07	TNF/IL6/CRP/PPARG/NFKBIA/PLA2G10/PPARD	7
BP	GO:0006970	response to osmotic stress	8/137	81/18888	0.0987654320987654	13.6166531494999	9.72649723823358	1.28512942270892e-07	1.35440863687112e-06	6.07469319969657e-07	ABCB1/TP53/TNF/CASP3/BAX/CASP1/HSP90AA1/PTGS2	8
BP	GO:0060759	regulation of response to cytokine stimulus	11/137	189/18888	0.0582010582010582	8.02409917738385	8.2954873063793	1.33264354927697e-07	1.40070867679381e-06	6.28235470598595e-07	IL6/PPARG/CASP8/CCL5/HIF1A/CASP1/ADAM17/AXL/BIRC7/GSTP1/SYK	11
BP	GO:0008584	male gonad development	10/137	149/18888	0.0671140939597315	9.25292705628766	8.64485059650029	1.34331578694013e-07	1.4043755954374e-06	6.29880129761399e-07	CYP1B1/INSR/ACE/IL1A/BCL2/BAX/BCL2L1/AR/ESR1/REN	10
BP	GO:0033157	regulation of intracellular protein transport	10/137	149/18888	0.0671140939597315	9.25292705628766	8.64485059650029	1.34331578694013e-07	1.4043755954374e-06	6.29880129761399e-07	CHRM1/IL1B/IFNG/TGFB1/PRKACA/HSP90AA1/CDK1/MAPK14/PTGS2/CDC42	10
BP	GO:0001836	release of cytochrome c from mitochondria	7/137	55/18888	0.127272727272727	17.5469143994691	10.5043254446603	1.37435833797065e-07	1.43299762705739e-06	6.42717471174484e-07	TP53/AKT1/MMP9/BCL2/BAX/SOD2/BCL2L1	7
BP	GO:0000082	G1/S transition of mitotic cell cycle	12/137	234/18888	0.0512820512820513	7.07018528916339	7.98644393415064	1.40115395570966e-07	1.45423040960794e-06	6.5224064138022e-07	TP53/PTEN/AKT1/EGFR/CCL2/BCL2/MYC/ADAM17/CYP1A1/CDK1/CDKN1A/E2F1	12
BP	GO:1902107	positive regulation of leukocyte differentiation	11/137	190/18888	0.0578947368421053	7.98186707645025	8.26761711952485	1.405880037933e-07	1.45423040960794e-06	6.5224064138022e-07	IL10/TNF/IFNG/TGFB1/IL2/CASP8/FOS/AXL/PNP/PRKCA/SYK	11
BP	GO:1903708	positive regulation of hemopoiesis	11/137	190/18888	0.0578947368421053	7.98186707645025	8.26761711952485	1.405880037933e-07	1.45423040960794e-06	6.5224064138022e-07	IL10/TNF/IFNG/TGFB1/IL2/CASP8/FOS/AXL/PNP/PRKCA/SYK	11
BP	GO:0046546	development of primary male sexual characteristics	10/137	150/18888	0.0666666666666667	9.19124087591241	8.60920930207815	1.43047270722162e-07	1.47576471905977e-06	6.61899050196145e-07	CYP1B1/INSR/ACE/IL1A/BCL2/BAX/BCL2L1/AR/ESR1/REN	10
BP	GO:0032930	positive regulation of superoxide anion generation	5/137	18/18888	0.277777777777778	38.2968369829684	13.5316844459011	1.4817282152276e-07	1.52462034777367e-06	6.83811414562102e-07	CRP/EGFR/TGFB1/GSTP1/SYK	5
BP	GO:0050871	positive regulation of B cell activation	8/137	83/18888	0.0963855421686747	13.2885410254155	9.59030143622647	1.55692229184825e-07	1.59360370710122e-06	7.14751319432128e-07	IL10/IL6/TGFB1/IL2/BCL2/MIF/CDKN1A/SYK	8
BP	GO:0150076	neuroinflammatory response	8/137	83/18888	0.0963855421686747	13.2885410254155	9.59030143622647	1.55692229184825e-07	1.59360370710122e-06	7.14751319432128e-07	NR3C1/TNF/IL6/EGFR/IL1B/IFNG/MMP9/PTGS2	8
BP	GO:0070231	T cell apoptotic process	7/137	56/18888	0.125	17.2335766423358	10.3989517548761	1.56125611152024e-07	1.59386720523345e-06	7.14869501660771e-07	TP53/AKT1/CCL5/BCL2/BAX/HIF1A/LGALS3	7
BP	GO:1904035	regulation of epithelial cell apoptotic process	9/137	115/18888	0.0782608695652174	10.7897175499841	9.00081424025089	1.56546032989699e-07	1.59399736716073e-06	7.14927880923349e-07	TNF/CD40LG/IL6/TGFB1/CCL2/ICAM1/BCL2/BAX/ESR1	9
BP	GO:0008625	extrinsic apoptotic signaling pathway via death domain receptors	8/137	84/18888	0.0952380952380952	13.1303441084463	9.52395203502325	1.71038282507857e-07	1.73703814183304e-06	7.79083468648229e-07	TNF/ICAM1/NOS3/CASP8/BCL2/BAX/BCL2L1/LGALS3	8
BP	GO:0050729	positive regulation of inflammatory response	10/137	153/18888	0.065359477124183	9.01102046658079	8.50425481928313	1.72251464609525e-07	1.74482701197731e-06	7.82576874937193e-07	TNF/IL6/IL1B/IFNG/TGFB1/IL2/NFKBIA/CASP1/S100A9/PTGS2	10
BP	GO:0050767	regulation of neurogenesis	15/137	393/18888	0.0381679389312977	5.26216080682008	7.2984140070301	1.75686222500298e-07	1.77367286159705e-06	7.95514601540097e-07	TP53/PTEN/TNF/IL6/EGFR/IL1B/IFNG/VEGFA/TGFB1/ACE/F2/SPP1/HIF1A/MME/RELA	15
BP	GO:0009743	response to carbohydrate	12/137	239/18888	0.0502092050209205	6.92227346303027	7.87570045954038	1.76189189601362e-07	1.77367286159705e-06	7.95514601540097e-07	TNF/IL1B/ACE/ICAM1/PRKACA/IL1A/CASP3/HIF1A/NCF1/SOD2/PRKCB/PTGS2	12
BP	GO:0031663	lipopolysaccharide-mediated signaling pathway	7/137	57/18888	0.12280701754386	16.9312331924702	10.2962644291353	1.76913661386918e-07	1.77367286159705e-06	7.95514601540097e-07	AKT1/MAPK1/NOS3/MIF/NFKBIA/MAPK14/PRKCA	7
BP	GO:2000107	negative regulation of leukocyte apoptotic process	7/137	57/18888	0.12280701754386	16.9312331924702	10.2962644291353	1.76913661386918e-07	1.77367286159705e-06	7.95514601540097e-07	IL2/CCL5/BCL2/MIF/HIF1A/BCL2L1/AXL	7
BP	GO:1901099	negative regulation of signal transduction in absence of ligand	6/137	35/18888	0.171428571428571	23.6346193952033	11.4563570753071	1.78106029286666e-07	1.77651677171138e-06	7.96790131019293e-07	TNF/AKT1/IL1B/IL1A/BCL2/BCL2L1	6
BP	GO:2001240	negative regulation of extrinsic apoptotic signaling pathway in absence of ligand	6/137	35/18888	0.171428571428571	23.6346193952033	11.4563570753071	1.78106029286666e-07	1.77651677171138e-06	7.96790131019293e-07	TNF/AKT1/IL1B/IL1A/BCL2/BCL2L1	6
BP	GO:0010721	negative regulation of cell development	13/137	288/18888	0.0451388888888889	6.22323600973236	7.63499889071258	1.81854397420484e-07	1.80928929749133e-06	8.11489021300457e-07	TP53/PTEN/TNF/IL6/IL1B/VEGFA/F2/IL2/IL1A/MYC/SPP1/IRF1/ERBB2	13
BP	GO:0071456	cellular response to hypoxia	10/137	154/18888	0.0649350649350649	8.95250734666793	8.46990888213451	1.8308784055041e-07	1.81693770698503e-06	8.14919429219832e-07	TP53/PPARG/VEGFA/TGFB1/BCL2/MYC/HIF1A/FOS/PPARD/PTGS2	10
BP	GO:0030183	B cell differentiation	10/137	155/18888	0.0645161290322581	8.89474923475394	8.43587389863402	1.9451879840993e-07	1.92548987793121e-06	8.63606444106447e-07	TP53/IL10/CD40LG/IL6/IL2/BCL2/VCAM1/BAX/ADAM17/SYK	10
BP	GO:0002544	chronic inflammatory response	5/137	19/18888	0.263157894736842	36.2812139838648	13.1515044222851	1.99922138043371e-07	1.97397868623631e-06	8.85354284902327e-07	IL10/TNF/CCL5/VCAM1/S100A9	5
BP	GO:0030072	peptide hormone secretion	12/137	242/18888	0.0495867768595041	6.83646015563733	7.81077135553697	2.01613974417237e-07	1.98566911831586e-06	8.90597590823588e-07	CHRM3/TNF/IL6/EGFR/IL1B/IFNG/F2/PRKACA/CCL5/NOS2/HIF1A/PRKCB	12
BP	GO:0032370	positive regulation of lipid transport	8/137	87/18888	0.0919540229885057	12.6775736219482	9.33149703556637	2.25112803810551e-07	2.21022705280708e-06	9.91314650686929e-07	IL1B/PPARG/IL1A/PON1/SPP1/MIF/NFKBIA/PLA2G10	8
BP	GO:0007566	embryo implantation	7/137	59/18888	0.11864406779661	16.3572930842509	10.098493900915	2.25544908969316e-07	2.21022705280708e-06	9.91314650686929e-07	IL1B/MMP2/VEGFA/MMP9/SPP1/PPARD/PTGS2	7
BP	GO:0006631	fatty acid metabolic process	15/137	401/18888	0.0374064837905237	5.15718004259424	7.19229274877313	2.27556617354718e-07	2.22436593464237e-06	9.97656117139368e-07	CYP3A4/CYP1B1/CYP2C9/AKT1/IL1B/PPARG/MIF/GSTM1/CYP1A1/PTGS1/PLA2G10/GSTP1/MAPK14/PPARD/PTGS2	15
BP	GO:0030073	insulin secretion	11/137	200/18888	0.055	7.58277372262774	7.99966994117273	2.35964718213443e-07	2.30080311275452e-06	1.03193915354665e-06	CHRM3/TNF/IL6/IL1B/IFNG/F2/PRKACA/CCL5/NOS2/HIF1A/PRKCB	11
BP	GO:0002790	peptide secretion	12/137	247/18888	0.048582995951417	6.69807027394427	7.70497495342517	2.51324530432795e-07	2.44447491042842e-06	1.09637776302968e-06	CHRM3/TNF/IL6/EGFR/IL1B/IFNG/F2/PRKACA/CCL5/NOS2/HIF1A/PRKCB	12
BP	GO:0033280	response to vitamin D	6/137	37/18888	0.162162162162162	22.357072400868	11.1148841922356	2.52076062248992e-07	2.44570075283762e-06	1.09692756877843e-06	VDR/CXCL10/SPP1/PIM1/PRKCB/PTGS2	6
BP	GO:0002367	cytokine production involved in immune response	9/137	122/18888	0.0737704918032787	10.1706353954768	8.68606436764698	2.60150075552254e-07	2.5177890975478e-06	1.12926009867133e-06	IL10/TNF/IL6/IL1B/TGFB1/MIF/AXL/SYK/TREM1	9
BP	GO:0045444	fat cell differentiation	12/137	248/18888	0.0483870967741935	6.67106192606546	7.68416767373692	2.62486184545417e-07	2.52731639581963e-06	1.13353321185503e-06	TNF/IL6/AKT1/PPARG/TGFB1/SOD2/PIM1/E2F1/MAPK14/PPARD/PTGS2/RUNX1T1	12
BP	GO:0002902	regulation of B cell apoptotic process	5/137	20/18888	0.25	34.4671532846715	12.7997177710336	2.65012716697199e-07	2.52731639581963e-06	1.13353321185503e-06	IL10/IL2/BCL2/BAX/MIF	5
BP	GO:0010224	response to UV-B	5/137	20/18888	0.25	34.4671532846715	12.7997177710336	2.65012716697199e-07	2.52731639581963e-06	1.13353321185503e-06	BCL2/MME/RELA/CDKN1A/MAPK14	5
BP	GO:0032303	regulation of icosanoid secretion	5/137	20/18888	0.25	34.4671532846715	12.7997177710336	2.65012716697199e-07	2.52731639581963e-06	1.13353321185503e-06	IL1B/IL1A/MIF/PLA2G10/SYK	5
BP	GO:0060749	mammary gland alveolus development	5/137	20/18888	0.25	34.4671532846715	12.7997177710336	2.65012716697199e-07	2.52731639581963e-06	1.13353321185503e-06	VEGFA/EGF/HIF1A/AR/ESR1	5
BP	GO:0061377	mammary gland lobule development	5/137	20/18888	0.25	34.4671532846715	12.7997177710336	2.65012716697199e-07	2.52731639581963e-06	1.13353321185503e-06	VEGFA/EGF/HIF1A/AR/ESR1	5
BP	GO:0050829	defense response to Gram-negative bacterium	8/137	89/18888	0.0898876404494382	12.3926843270729	9.2083803655448	2.68794341518686e-07	2.55714324899772e-06	1.14691093090058e-06	IL6/F2/SELP/NOS2/RNASE3/LYZ/CTSG/TREM1	8
BP	GO:0002688	regulation of leukocyte chemotaxis	9/137	123/18888	0.0731707317073171	10.0879473028307	8.6431814068584	2.78978940031071e-07	2.64118076397455e-06	1.18460281404808e-06	IL6/MAPK1/VEGFA/CXCL8/CCL2/CCL5/CXCL10/MIF/ADAM17	9
BP	GO:0045834	positive regulation of lipid metabolic process	9/137	123/18888	0.0731707317073171	10.0879473028307	8.6431814068584	2.78978940031071e-07	2.64118076397455e-06	1.18460281404808e-06	TNF/AKT1/IL1B/IFNG/PPARG/F2/IL1A/PPARD/PTGS2	9
BP	GO:0048010	vascular endothelial growth factor receptor signaling pathway	7/137	61/18888	0.114754098360656	15.820988392964	9.91016944576051	2.8497728281194e-07	2.6914521154461e-06	1.20715014788887e-06	IL1B/VEGFA/HIF1A/HSPB1/AXL/MAPK14/PRKCB	7
BP	GO:0051960	regulation of nervous system development	16/137	468/18888	0.0341880341880342	4.71345685944226	6.95322132363886	2.95868449785702e-07	2.78757985219782e-06	1.25026464766767e-06	TP53/PTEN/TNF/IL6/AKT1/EGFR/IL1B/IFNG/VEGFA/TGFB1/ACE/F2/SPP1/HIF1A/MME/RELA	16
BP	GO:0007623	circadian rhythm	11/137	205/18888	0.0536585365853659	7.39782802207584	7.87255570339961	3.02340464334261e-07	2.84170965275712e-06	1.27454254448603e-06	TP53/PTEN/TNF/EGFR/PPARG/NOS2/PARP1/TOP1/CLDN4/MAPK8/CDK1	11
BP	GO:0030307	positive regulation of cell growth	10/137	163/18888	0.0613496932515337	8.45819712507277	8.17421965420257	3.10939030459189e-07	2.91551944627201e-06	1.30764716583367e-06	AKT1/EGFR/VEGFA/F2/IL2/BCL2/ADAM17/S100A9/ERBB2/CDC42	10
BP	GO:0032731	positive regulation of interleukin-1 beta production	7/137	62/18888	0.112903225806452	15.5658111608194	9.81931177507994	3.1931721996776e-07	2.98193004360678e-06	1.33743315456963e-06	TNF/IL6/IFNG/CASP8/CASP1/HSPB1/RELA	7
BP	GO:1900542	regulation of purine nucleotide metabolic process	8/137	91/18888	0.0879120879120879	12.1203176385658	9.08914799243218	3.19546979097504e-07	2.98193004360678e-06	1.33743315456963e-06	TP53/INSR/IFNG/NOS3/PRKACA/NOS2/HIF1A/PARP1	8
BP	GO:0050870	positive regulation of T cell activation	12/137	253/18888	0.0474308300395257	6.53922275756614	7.58182837479405	3.25198416430993e-07	3.02744240058377e-06	1.35784601948379e-06	CD40LG/IL6/AKT1/IL1B/IFNG/CCL2/IL2/IL1A/CCL5/VCAM1/PNP/SYK	12
BP	GO:0032928	regulation of superoxide anion generation	5/137	21/18888	0.238095238095238	32.8258602711157	12.4729140937229	3.45806725181018e-07	3.21164915785696e-06	1.4404650685125e-06	CRP/EGFR/TGFB1/GSTP1/SYK	5
BP	GO:0006140	regulation of nucleotide metabolic process	8/137	92/18888	0.0869565217391304	11.9885750555379	9.03092283029018	3.47860183141927e-07	3.22306473005909e-06	1.44558509631941e-06	TP53/INSR/IFNG/NOS3/PRKACA/NOS2/HIF1A/PARP1	8
BP	GO:0043123	positive regulation of canonical NF-kappaB signal transduction	11/137	208/18888	0.0528846153846154	7.29112857944975	7.79832534339781	3.49656606721862e-07	3.23205043092785e-06	1.44961529625139e-06	TNF/IL1B/VEGFA/TGFB1/CASP8/IL1A/CHUK/PARP1/CASP1/RELA/PRKCB	11
BP	GO:0032615	interleukin-12 production	7/137	63/18888	0.111111111111111	15.3187347931873	9.73054094435557	3.57073900350931e-07	3.27736842810362e-06	1.46994098834853e-06	IL10/CD40LG/IFNG/IRF1/RELA/MAPK14/SYK	7
BP	GO:0032655	regulation of interleukin-12 production	7/137	63/18888	0.111111111111111	15.3187347931873	9.73054094435557	3.57073900350931e-07	3.27736842810362e-06	1.46994098834853e-06	IL10/CD40LG/IFNG/IRF1/RELA/MAPK14/SYK	7
BP	GO:0032757	positive regulation of interleukin-8 production	7/137	63/18888	0.111111111111111	15.3187347931873	9.73054094435557	3.57073900350931e-07	3.27736842810362e-06	1.46994098834853e-06	TNF/IL6/IL1B/F3/NOS2/RELA/SYK	7
BP	GO:0006633	fatty acid biosynthetic process	10/137	166/18888	0.0602409638554217	8.30533814088471	8.08067803645607	3.68256275309007e-07	3.37208907835648e-06	1.51242439212327e-06	CYP3A4/CYP2C9/IL1B/MIF/GSTM1/CYP1A1/PTGS1/PLA2G10/GSTP1/PTGS2	10
BP	GO:0046683	response to organophosphorus	9/137	128/18888	0.0703125	9.69388686131387	8.43591332249206	3.91970698407022e-07	3.57274094641028e-06	1.60241928031216e-06	CYP1B1/IL1B/THBD/STAT1/FOS/RELA/DUOX2/PTGS2/REN	9
BP	GO:0070372	regulation of ERK1 and ERK2 cascade	13/137	308/18888	0.0422077922077922	5.81912977533416	7.28871018226278	3.919963851688e-07	3.57274094641028e-06	1.60241928031216e-06	TNF/EGFR/IL1B/TGFB1/CCL2/ICAM1/IL1A/CCL5/MIF/ERBB2/GSTP1/PRKCA/SYK	13
BP	GO:0010742	macrophage derived foam cell differentiation	6/137	40/18888	0.15	20.6802919708029	10.6502169130151	4.08833197373091e-07	3.69177321415424e-06	1.65580675051311e-06	CRP/PPARG/TGFB1/STAT1/NFKBIA/PLA2G10	6
BP	GO:0042307	positive regulation of protein import into nucleus	6/137	40/18888	0.15	20.6802919708029	10.6502169130151	4.08833197373091e-07	3.69177321415424e-06	1.65580675051311e-06	IFNG/TGFB1/HSP90AA1/CDK1/MAPK14/PTGS2	6
BP	GO:0048246	macrophage chemotaxis	6/137	40/18888	0.15	20.6802919708029	10.6502169130151	4.08833197373091e-07	3.69177321415424e-06	1.65580675051311e-06	MAPK1/MMP2/CCL2/CCL5/MIF/LGALS3	6
BP	GO:0140448	signaling receptor ligand precursor processing	6/137	40/18888	0.15	20.6802919708029	10.6502169130151	4.08833197373091e-07	3.69177321415424e-06	1.65580675051311e-06	ACE/CASP1/MME/CTSG/BCHE/REN	6
BP	GO:0019915	lipid storage	8/137	94/18888	0.0851063829787234	11.7334989905265	8.91713193049678	4.10980641472358e-07	3.694101857832e-06	1.65685117651046e-06	TNF/IL6/CRP/IL1B/PPARG/NFKBIA/PLA2G10/PPARD	8
BP	GO:0097194	execution phase of apoptosis	8/137	94/18888	0.0851063829787234	11.7334989905265	8.91713193049678	4.10980641472358e-07	3.694101857832e-06	1.65685117651046e-06	TP53/IL6/AKT1/CASP8/CASP3/BAX/BCL2L1/APAF1	8
BP	GO:0032612	interleukin-1 production	9/137	129/18888	0.0697674418604651	9.61874045153624	8.39582490240344	4.18802850245913e-07	3.74718339693712e-06	1.6806589148734e-06	IL10/TNF/IL6/IFNG/CASP8/CASP1/HSPB1/RELA/GSTP1	9
BP	GO:0032652	regulation of interleukin-1 production	9/137	129/18888	0.0697674418604651	9.61874045153624	8.39582490240344	4.18802850245913e-07	3.74718339693712e-06	1.6806589148734e-06	IL10/TNF/IL6/IFNG/CASP8/CASP1/HSPB1/RELA/GSTP1	9
BP	GO:0007162	negative regulation of cell adhesion	13/137	310/18888	0.0419354838709677	5.78158700259006	7.25576129872898	4.21908067646611e-07	3.75776889407346e-06	1.68540664356613e-06	CYP1B1/PTEN/IL10/AKT1/MMP2/VEGFA/TGFB1/IL2/CASP3/IRF1/CTSG/LGALS3/ERBB2	13
BP	GO:0030217	T cell differentiation	13/137	310/18888	0.0419354838709677	5.78158700259006	7.25576129872898	4.21908067646611e-07	3.75776889407346e-06	1.68540664356613e-06	TP53/IL6/IL1B/IFNG/TGFB1/IL2/IL1A/BCL2/IRF1/ADAM17/ERBB2/PNP/SYK	13
BP	GO:0034504	protein localization to nucleus	13/137	311/18888	0.0418006430868167	5.76299669068463	7.23939445091371	4.37616610583786e-07	3.88882033496046e-06	1.74418486419279e-06	TP53/AKT1/IFNG/TGFB1/F2/NFKBIA/PARP1/HSP90AA1/CDK1/CDKN1A/MAPK14/PTGS2/SYK	13
BP	GO:0050435	amyloid-beta metabolic process	7/137	65/18888	0.107692307692308	14.8473891072431	9.55894	4.43931050131268e-07	3.9359873152228e-06	1.76533984847522e-06	TNF/IFNG/ACE/CASP3/MME/RELA/REN	7
BP	GO:0050864	regulation of B cell activation	9/137	130/18888	0.0692307692307692	9.54475014037058	8.35617131478065	4.47213837499833e-07	3.95612240865237e-06	1.77437069129488e-06	IL10/IL6/TGFB1/IL2/CASP3/BCL2/MIF/CDKN1A/SYK	9
BP	GO:0044843	cell cycle G1/S phase transition	12/137	262/18888	0.0458015267175573	6.3145929681841	7.40440919989671	4.72406212587698e-07	4.16954467543544e-06	1.87009326403969e-06	TP53/PTEN/AKT1/EGFR/CCL2/BCL2/MYC/ADAM17/CYP1A1/CDK1/CDKN1A/E2F1	12
BP	GO:0032570	response to progesterone	6/137	41/18888	0.146341463414634	20.1758946056614	10.5064501431793	4.76078749915789e-07	4.18307395993423e-06	1.87616131841444e-06	CYP1B1/TGFB1/FOS/CLDN4/RELA/GPI	6
BP	GO:0090077	foam cell differentiation	6/137	41/18888	0.146341463414634	20.1758946056614	10.5064501431793	4.76078749915789e-07	4.18307395993423e-06	1.87616131841444e-06	CRP/PPARG/TGFB1/STAT1/NFKBIA/PLA2G10	6
BP	GO:0034284	response to monosaccharide	11/137	215/18888	0.0511627906976744	7.05374299779324	7.63072	4.86376595348023e-07	4.25443509577354e-06	1.90816768597623e-06	TNF/ACE/ICAM1/PRKACA/IL1A/CASP3/HIF1A/NCF1/SOD2/PRKCB/PTGS2	11
BP	GO:0050866	negative regulation of cell activation	11/137	215/18888	0.0511627906976744	7.05374299779324	7.63072	4.86376595348023e-07	4.25443509577354e-06	1.90816768597623e-06	IL10/THBD/F2/IL2/NOS3/CASP3/IRF1/CTSG/LGALS3/AXL/ERBB2	11
BP	GO:0031400	negative regulation of protein modification process	15/137	426/18888	0.0352112676056338	4.85452863164388	6.87806473572902	4.9127576961277e-07	4.28769700711146e-06	1.92308607183946e-06	PTEN/TNF/AKT1/IL1B/IFNG/PPARG/TGFB1/IL2/BAX/XDH/HSPB1/RELA/LGALS3/CDKN1A/GSTP1	15
BP	GO:0019730	antimicrobial humoral response	9/137	132/18888	0.0681818181818182	9.40013271400133	8.27813601676463	5.09085754002244e-07	4.43324119854961e-06	1.98836447349136e-06	CXCL8/F2/CXCL10/S100A9/RNASE3/LYZ/CTSG/CXCL11/REG1A	9
BP	GO:0009266	response to temperature stimulus	10/137	172/18888	0.0581395348837209	8.01561704294687	7.90047378699919	5.112747192052e-07	4.44240922687185e-06	1.99247644958097e-06	AKT1/NOS3/PRKACA/IL1A/CXCL10/NFKBIA/HSP90AA1/HSPB1/CDKN1A/PTGS2	10
BP	GO:0006816	calcium ion transport	15/137	428/18888	0.0350467289719626	4.8318439184119	6.85398901025654	5.21221571499342e-07	4.51879455557079e-06	2.02673623087386e-06	ACE/CCL2/F2/NOS3/PRKACA/CCL5/EGF/BCL2/VDR/CXCL10/BAX/LGALS3/CXCL11/PRKCB/PTGS2	15
BP	GO:0046661	male sex differentiation	10/137	173/18888	0.0578034682080925	7.96928399645585	7.8712889421983	5.39326497408119e-07	4.66541284262333e-06	2.09249637792717e-06	CYP1B1/INSR/ACE/IL1A/BCL2/BAX/BCL2L1/AR/ESR1/REN	10
BP	GO:0032735	positive regulation of interleukin-12 production	6/137	42/18888	0.142857142857143	19.6955161626694	10.3676915666192	5.52131641058138e-07	4.75514254743903e-06	2.13274127985824e-06	CD40LG/IFNG/IRF1/RELA/MAPK14/SYK	6
BP	GO:0060251	regulation of glial cell proliferation	6/137	42/18888	0.142857142857143	19.6955161626694	10.3676915666192	5.52131641058138e-07	4.75514254743903e-06	2.13274127985824e-06	CHRM1/TP53/TNF/IL6/EGFR/IL1B	6
BP	GO:0045637	regulation of myeloid cell differentiation	11/137	218/18888	0.0504587155963303	6.95667314002545	7.56117717068758	5.58152634305832e-07	4.796432527771e-06	2.15126035570507e-06	TNF/IFNG/TGFB1/STAT1/CASP8/MYC/HIF1A/NFKBIA/FOS/MAPK14/PRKCA	11
BP	GO:0043405	regulation of MAP kinase activity	9/137	134/18888	0.0671641791044776	9.25983222573265	8.20174431315511	5.78244294395841e-07	4.95819120852574e-06	2.22381115988798e-06	TNF/INSR/EGFR/IL1B/PPARG/VEGFA/EGF/ERBB2/GSTP1	9
BP	GO:0050804	modulation of chemical synaptic transmission	16/137	493/18888	0.0324543610547667	4.47443774892288	6.68171050514172	5.91566782002793e-07	5.06132629678539e-06	2.27006854501129e-06	CHRM1/CHRM2/PTEN/TNF/EGFR/IL1B/MAPK1/ACE/CCL2/PRKACA/CA2/PLAT/MME/BCHE/PRKCB/PTGS2	16
BP	GO:0099177	regulation of trans-synaptic signaling	16/137	494/18888	0.0323886639676113	4.46538018262951	6.67122867700673	6.07635028741108e-07	5.18745188292081e-06	2.32663745778599e-06	CHRM1/CHRM2/PTEN/TNF/EGFR/IL1B/MAPK1/ACE/CCL2/PRKACA/CA2/PLAT/MME/BCHE/PRKCB/PTGS2	16
BP	GO:0098869	cellular oxidant detoxification	8/137	99/18888	0.0808080808080808	11.140898031409	8.64712499412053	6.13173160876388e-07	5.22332692598404e-06	2.34272786611641e-06	NOS3/MPO/S100A9/SOD2/PTGS1/DUOX2/GSTP1/PTGS2	8
BP	GO:0009154	purine ribonucleotide catabolic process	9/137	135/18888	0.0666666666666667	9.19124087591241	8.16414597825838	6.15775644226363e-07	5.23409297592408e-06	2.34755657501401e-06	INSR/IFNG/PRKACA/HIF1A/XDH/GPI/TPI1/PNP/HPRT1	9
BP	GO:0032635	interleukin-6 production	10/137	176/18888	0.0568181818181818	7.83344392833444	7.78512197779779	6.3173197737653e-07	5.34647625874942e-06	2.39796189179608e-06	IL10/TNF/IL6/IL1B/IFNG/TGFB1/IL1A/NOS2/RELA/SYK	10
BP	GO:0032675	regulation of interleukin-6 production	10/137	176/18888	0.0568181818181818	7.83344392833444	7.78512197779779	6.3173197737653e-07	5.34647625874942e-06	2.39796189179608e-06	IL10/TNF/IL6/IL1B/IFNG/TGFB1/IL1A/NOS2/RELA/SYK	10
BP	GO:0051353	positive regulation of oxidoreductase activity	6/137	43/18888	0.13953488372093	19.2374809030725	10.2336500998372	6.3786186128499e-07	5.38669520005251e-06	2.41600059315856e-06	TNF/AKT1/IL1B/IFNG/VDR/HIF1A	6
BP	GO:0050890	cognition	13/137	322/18888	0.0403726708074534	5.56612413292832	7.06392425099847	6.4834449967096e-07	5.46342024507209e-06	2.45041274149687e-06	CHRM1/PTEN/TNF/INSR/EGFR/MAPK1/CASP3/HIF1A/FOS/MME/GPI/BCHE/PTGS2	13
BP	GO:0014002	astrocyte development	6/137	44/18888	0.136363636363636	18.8002654280027	10.1040578857848	7.34198010308163e-07	6.17357896839767e-06	2.76892786683282e-06	TNF/IL6/EGFR/IL1B/IFNG/S100A9	6
BP	GO:0061041	regulation of wound healing	9/137	138/18888	0.0652173913043478	8.99143129165344	8.05365522907725	7.41313352247239e-07	6.21018840570225e-06	2.78534766022344e-06	PTEN/TNF/THBD/F2/NOS3/F3/PLAT/CLDN4/DUOX2	9
BP	GO:0050918	positive chemotaxis	7/137	70/18888	0.1	13.7868613138686	9.16127246333367	7.41728385028888e-07	6.21018840570225e-06	2.78534766022344e-06	VEGFA/CXCL8/F3/CCL5/CXCL10/MIF/LGALS3	7
BP	GO:0001906	cell killing	11/137	226/18888	0.0486725663716814	6.71041922356437	7.38197680874151	7.97263024812126e-07	6.66089407481926e-06	2.98749482531939e-06	IFNG/TGFB1/F2/ICAM1/NOS2/LYZ/MAPK8/CTSG/SYK/TREM1/HPRT1	11
BP	GO:0048662	negative regulation of smooth muscle cell proliferation	7/137	71/18888	0.0985915492957746	13.5926801686029	9.08660630779695	8.17914124989913e-07	6.81885763051292e-06	3.05834346814767e-06	PTEN/IL10/IFNG/PPARG/NOS3/SOD2/CDKN1A	7
BP	GO:0008202	steroid metabolic process	13/137	329/18888	0.0395136778115502	5.44769595988729	6.95641225593016	8.25741507593891e-07	6.86946658445131e-06	3.08104222094384e-06	CYP3A4/NR3C1/CYP1B1/CYP2C9/HSD11B1/TNF/IFNG/IL1A/PON1/SPP1/CYP1A1/ESR1/PPARD	13
BP	GO:0043467	regulation of generation of precursor metabolites and energy	9/137	140/18888	0.0642857142857143	8.86298227320125	7.98184700100051	8.36809158882391e-07	6.94675968414044e-06	3.11570914895086e-06	TP53/TNF/INSR/AKT1/IFNG/PRKACA/NOS2/HIF1A/CDK1	9
BP	GO:0001660	fever generation	4/137	11/18888	0.363636363636364	50.1340411413404	13.9329120807568	8.40308289919615e-07	6.96102841861376e-06	3.12210885594576e-06	TNF/IL1B/IL1A/PTGS2	4
BP	GO:0001503	ossification	15/137	446/18888	0.0336322869955157	4.63683676475402	6.64380360610243	8.7464600776012e-07	7.23016044469782e-06	3.24281795688964e-06	TNF/IL6/AKT1/EGFR/MAPK1/MMP2/PPARG/PRKACA/BCL2/VDR/SPP1/HIF1A/MAPK14/NR1I3/PTGS2	15
BP	GO:0010623	programmed cell death involved in cell development	5/137	25/18888	0.2	27.5737226277372	11.3644016990453	8.82069928216101e-07	7.26082825121043e-06	3.2565728540898e-06	IL1B/IL1A/BCL2/BAX/BCL2L1	5
BP	GO:0035994	response to muscle stretch	5/137	25/18888	0.2	27.5737226277372	11.3644016990453	8.82069928216101e-07	7.26082825121043e-06	3.2565728540898e-06	NFKBIA/FOS/RELA/GPI/MAPK14	5
BP	GO:0009261	ribonucleotide catabolic process	9/137	141/18888	0.0638297872340425	8.80012424289486	7.94647906884985	8.88423233996747e-07	7.29776227925899e-06	3.27313823051433e-06	INSR/IFNG/PRKACA/HIF1A/XDH/GPI/TPI1/PNP/HPRT1	9
BP	GO:0010469	regulation of signaling receptor activity	8/137	104/18888	0.0769230769230769	10.6052779337451	8.39580073647076	8.94940197701614e-07	7.32053592680609e-06	3.28335249806406e-06	IL10/TNF/IFNG/PPARG/CCL2/HIF1A/NCF1/ADAM17	8
BP	GO:0042100	B cell proliferation	8/137	104/18888	0.0769230769230769	10.6052779337451	8.39580073647076	8.94940197701614e-07	7.32053592680609e-06	3.28335249806406e-06	IL10/CD40LG/IL2/CASP3/BCL2/BAX/MIF/CDKN1A	8
BP	GO:0042698	ovulation cycle	7/137	72/18888	0.0972222222222222	13.4038929440389	9.01343149086281	9.00557469190345e-07	7.35110585497756e-06	3.29706349559634e-06	CYP1B1/EGFR/MMP2/NOS3/CASP3/AXL/ESR1	7
BP	GO:0045787	positive regulation of cell cycle	13/137	332/18888	0.0391566265060241	5.39846979157506	6.91127271561664	9.14200162943371e-07	7.44692216064288e-06	3.34003831461328e-06	IL10/TNF/INSR/AKT1/EGFR/IL1B/IL1A/EGF/ADAM17/CYP1A1/CDK1/PRKCA/CDC42	13
BP	GO:0006913	nucleocytoplasmic transport	13/137	333/18888	0.039039039039039	5.38225817057934	6.89634776424716	9.45511721471673e-07	7.67002247085942e-06	3.44010161164404e-06	TP53/AKT1/IL1B/IFNG/TGFB1/PRKACA/NFKBIA/HSP90AA1/CDK1/CDKN1A/MAPK14/PTGS2/SYK	13
BP	GO:0051169	nuclear transport	13/137	333/18888	0.039039039039039	5.38225817057934	6.89634776424716	9.45511721471673e-07	7.67002247085942e-06	3.44010161164404e-06	TP53/AKT1/IL1B/IFNG/TGFB1/PRKACA/NFKBIA/HSP90AA1/CDK1/CDKN1A/MAPK14/PTGS2/SYK	13
BP	GO:2001239	regulation of extrinsic apoptotic signaling pathway in absence of ligand	6/137	46/18888	0.130434782608696	17.9828625833069	9.85725220568668	9.62708009287439e-07	7.7933505513745e-06	3.49541580793914e-06	TNF/AKT1/IL1B/IL1A/BCL2/BCL2L1	6
BP	GO:0032732	positive regulation of interleukin-1 production	7/137	73/18888	0.0958904109589041	13.2202779722028	8.94169723040621	9.9009095305684e-07	7.98197036381906e-06	3.58001416775409e-06	TNF/IL6/IFNG/CASP8/CASP1/HSPB1/RELA	7
BP	GO:0071260	cellular response to mechanical stimulus	7/137	73/18888	0.0958904109589041	13.2202779722028	8.94169723040621	9.9009095305684e-07	7.98197036381906e-06	3.58001416775409e-06	EGFR/IL1B/CASP8/IRF1/CASP1/MAPK8/PTGS2	7
BP	GO:2000045	regulation of G1/S transition of mitotic cell cycle	10/137	185/18888	0.0540540540540541	7.45235746695601	7.53838308857241	9.97185157893971e-07	8.02262133202762e-06	3.59824663862109e-06	TP53/PTEN/AKT1/EGFR/CCL2/BCL2/ADAM17/CYP1A1/CDKN1A/E2F1	10
BP	GO:0014074	response to purine-containing compound	9/137	143/18888	0.0629370629370629	8.67704558215507	7.87678465564767	9.99964637821838e-07	8.02846351926774e-06	3.60086693312695e-06	CYP1B1/IL1B/THBD/STAT1/FOS/RELA/DUOX2/PTGS2/REN	9
BP	GO:0046425	regulation of receptor signaling pathway via JAK-STAT	8/137	106/18888	0.0754716981132075	10.4051783500895	8.30000983200673	1.03518260386681e-06	8.29418848590007e-06	3.72004792502612e-06	CYP1B1/IL10/TNF/IL6/IFNG/F2/CCL5/EGF	8
BP	GO:0006195	purine nucleotide catabolic process	9/137	144/18888	0.0625	8.61678832116788	7.84244625872937	1.06013666957394e-06	8.45945791435535e-06	3.79417334373833e-06	INSR/IFNG/PRKACA/HIF1A/XDH/GPI/TPI1/PNP/HPRT1	9
BP	GO:1900180	regulation of protein localization to nucleus	9/137	144/18888	0.0625	8.61678832116788	7.84244625872937	1.06013666957394e-06	8.45945791435535e-06	3.79417334373833e-06	AKT1/IFNG/TGFB1/F2/PARP1/HSP90AA1/CDK1/MAPK14/PTGS2	9
BP	GO:0001783	B cell apoptotic process	5/137	26/18888	0.192307692307692	26.5131948343627	11.1272336161691	1.08574061016822e-06	8.55896327773738e-06	3.838802751571e-06	IL10/IL2/BCL2/BAX/MIF	5
BP	GO:0002092	positive regulation of receptor internalization	5/137	26/18888	0.192307692307692	26.5131948343627	11.1272336161691	1.08574061016822e-06	8.55896327773738e-06	3.838802751571e-06	INSR/VEGFA/EGF/SELE/SYK	5
BP	GO:0035902	response to immobilization stress	5/137	26/18888	0.192307692307692	26.5131948343627	11.1272336161691	1.08574061016822e-06	8.55896327773738e-06	3.838802751571e-06	FOS/SOD2/CYP1A1/GPI/REN	5
BP	GO:0048143	astrocyte activation	5/137	26/18888	0.192307692307692	26.5131948343627	11.1272336161691	1.08574061016822e-06	8.55896327773738e-06	3.838802751571e-06	TNF/IL6/EGFR/IL1B/IFNG	5
BP	GO:0060333	type II interferon-mediated signaling pathway	5/137	26/18888	0.192307692307692	26.5131948343627	11.1272336161691	1.08574061016822e-06	8.55896327773738e-06	3.838802751571e-06	TP53/IFNG/PPARG/STAT1/IRF1	5
BP	GO:1904996	positive regulation of leukocyte adhesion to vascular endothelial cell	5/137	26/18888	0.192307692307692	26.5131948343627	11.1272336161691	1.08574061016822e-06	8.55896327773738e-06	3.838802751571e-06	TNF/IL6/SELP/SELE/RELA	5
BP	GO:0032963	collagen metabolic process	8/137	107/18888	0.0747663551401869	10.307933692612	8.2530669874216	1.11206070980501e-06	8.7488075962527e-06	3.92395031777009e-06	IL6/MMP2/TGFB1/F2/MMP9/HIF1A/CTSB/CTSS	8
BP	GO:0046434	organophosphate catabolic process	11/137	234/18888	0.047008547008547	6.48100318173311	7.21126663002502	1.12249155374364e-06	8.81313649626031e-06	3.95280263905497e-06	INSR/IFNG/PRKACA/PON1/HIF1A/XDH/PLA2G10/GPI/TPI1/PNP/HPRT1	11
BP	GO:0002637	regulation of immunoglobulin production	7/137	75/18888	0.0933333333333333	12.8677372262774	8.80235910867223	1.19166527091341e-06	9.33516622271488e-06	4.18693954153802e-06	IL10/TNF/CD40LG/IL6/TGFB1/IL2/GPI	7
BP	GO:1903076	regulation of protein localization to plasma membrane	8/137	108/18888	0.0740740740740741	10.2124898621249	8.20673979058353	1.19375527144692e-06	9.33516622271488e-06	4.18693954153802e-06	TNF/AKT1/EGFR/IFNG/TGFB1/BCL2L1/LGALS3/AR	8
BP	GO:0032640	tumor necrosis factor production	10/137	189/18888	0.0529100529100529	7.2946356158035	7.43398812153865	1.21157073396613e-06	9.43673619483581e-06	4.23249495237487e-06	IL10/IL6/IFNG/TGFB1/IL1A/MIF/HSPB1/AXL/GSTP1/SYK	10
BP	GO:0032680	regulation of tumor necrosis factor production	10/137	189/18888	0.0529100529100529	7.2946356158035	7.43398812153865	1.21157073396613e-06	9.43673619483581e-06	4.23249495237487e-06	IL10/IL6/IFNG/TGFB1/IL1A/MIF/HSPB1/AXL/GSTP1/SYK	10
BP	GO:0050714	positive regulation of protein secretion	9/137	147/18888	0.0612244897959184	8.4409354982869	7.74139778267114	1.25981664994633e-06	9.79300815365836e-06	4.39228740987881e-06	CHRM3/EGFR/PPARG/TGFB1/F2/PRKACA/IL1A/HIF1A/PRKCB	9
BP	GO:0002260	lymphocyte homeostasis	7/137	76/18888	0.0921052631578947	12.6984248943527	8.73466511925973	1.30467990354949e-06	1.0101581035403e-05	4.53068623098167e-06	AKT1/IL2/CASP3/BCL2/BAX/MIF/HIF1A	7
BP	GO:0035924	cellular response to vascular endothelial growth factor stimulus	7/137	76/18888	0.0921052631578947	12.6984248943527	8.73466511925973	1.30467990354949e-06	1.0101581035403e-05	4.53068623098167e-06	AKT1/VEGFA/VCAM1/XDH/HSPB1/RELA/MAPK14	7
BP	GO:0042759	long-chain fatty acid biosynthetic process	5/137	27/18888	0.185185185185185	25.5312246553122	10.9030577171716	1.32475784707802e-06	1.02367651819665e-05	4.59131802211771e-06	CYP3A4/CYP2C9/GSTM1/CYP1A1/GSTP1	5
BP	GO:0032611	interleukin-1 beta production	8/137	110/18888	0.0727272727272727	10.0268082282681	8.11587684455749	1.37258530281771e-06	1.05645837283804e-05	4.73834876604706e-06	TNF/IL6/IFNG/CASP8/CASP1/HSPB1/RELA/GSTP1	8
BP	GO:0032651	regulation of interleukin-1 beta production	8/137	110/18888	0.0727272727272727	10.0268082282681	8.11587684455749	1.37258530281771e-06	1.05645837283804e-05	4.73834876604706e-06	TNF/IL6/IFNG/CASP8/CASP1/HSPB1/RELA/GSTP1	8
BP	GO:0031669	cellular response to nutrient levels	11/137	239/18888	0.0460251046025105	6.34541734111108	7.10857174573677	1.38056623022583e-06	1.06051354816954e-05	4.7565367377856e-06	TP53/MAPK1/BCL2/VDR/HSPA5/FOS/MAPK8/HSPA8/PIM1/CDKN1A/PPARD	11
BP	GO:0006006	glucose metabolic process	10/137	192/18888	0.0520833333333333	7.18065693430657	7.35767261453662	1.39776182489489e-06	1.07161739908608e-05	4.80633890665612e-06	NR3C1/TP53/TNF/INSR/AKT1/PRKACA/GPI/TPI1/MAPK14/PPARD	10
BP	GO:0072523	purine-containing compound catabolic process	9/137	149/18888	0.0604026845637584	8.32763435065889	7.67561663336984	1.41029527334629e-06	1.07817699625442e-05	4.8357595255347e-06	INSR/IFNG/PRKACA/HIF1A/XDH/GPI/TPI1/PNP/HPRT1	9
BP	GO:0046427	positive regulation of receptor signaling pathway via JAK-STAT	6/137	49/18888	0.122448979591837	16.8818709965738	9.51481476524098	1.41183279304927e-06	1.07817699625442e-05	4.8357595255347e-06	CYP1B1/IL10/TNF/IL6/F2/CCL5	6
BP	GO:0032890	regulation of organic acid transport	7/137	77/18888	0.0909090909090909	12.5335102853351	8.66823117214444	1.42653357740884e-06	1.08727997810303e-05	4.87658754480995e-06	TNF/AKT1/IL1B/IL1A/MIF/PLA2G10/SYK	7
BP	GO:0001938	positive regulation of endothelial cell proliferation	8/137	111/18888	0.0720720720720721	9.93647662260801	8.07131443876268	1.47024074204487e-06	1.11841270455164e-05	5.01622174123848e-06	IL10/AKT1/VEGFA/F3/EGF/HIF1A/ADAM17/PRKCA	8
BP	GO:0045786	negative regulation of cell cycle	14/137	405/18888	0.0345679012345679	4.76582860232495	6.54834249978368	1.50142576809422e-06	1.13991742781522e-05	5.11267313161977e-06	TP53/PTEN/IL10/TNF/EGFR/TGFB1/CCL2/CASP3/BCL2/CDK1/CDKN1A/E2F1/MAPK14/PTGS2	14
BP	GO:0071706	tumor necrosis factor superfamily cytokine production	10/137	194/18888	0.0515463917525773	7.10662954323124	7.30770280901979	1.53533304078502e-06	1.16115129390125e-05	5.20790969347012e-06	IL10/IL6/IFNG/TGFB1/IL1A/MIF/HSPB1/AXL/GSTP1/SYK	10
BP	GO:1903555	regulation of tumor necrosis factor superfamily cytokine production	10/137	194/18888	0.0515463917525773	7.10662954323124	7.30770280901979	1.53533304078502e-06	1.16115129390125e-05	5.20790969347012e-06	IL10/IL6/IFNG/TGFB1/IL1A/MIF/HSPB1/AXL/GSTP1/SYK	10
BP	GO:0010827	regulation of glucose transmembrane transport	7/137	78/18888	0.0897435897435897	12.3728242560359	8.60301714590192	1.55777146793381e-06	1.17358120223915e-05	5.26365939677056e-06	TNF/INSR/AKT1/IL1B/ACE/MAPK14/PRKCB	7
BP	GO:0051101	regulation of DNA binding	7/137	78/18888	0.0897435897435897	12.3728242560359	8.60301714590192	1.55777146793381e-06	1.17358120223915e-05	5.26365939677056e-06	IFNG/PPARG/MMP9/EGF/JUN/MAPK8/E2F1	7
BP	GO:0014013	regulation of gliogenesis	8/137	112/18888	0.0714285714285714	9.84775808133472	8.02731433243478	1.57375308325228e-06	1.17880738611426e-05	5.28709948920811e-06	TP53/TNF/IL6/EGFR/IL1B/TGFB1/F2/RELA	8
BP	GO:0046822	regulation of nucleocytoplasmic transport	8/137	112/18888	0.0714285714285714	9.84775808133472	8.02731433243478	1.57375308325228e-06	1.17880738611426e-05	5.28709948920811e-06	IL1B/IFNG/TGFB1/PRKACA/HSP90AA1/CDK1/MAPK14/PTGS2	8
BP	GO:1905954	positive regulation of lipid localization	8/137	112/18888	0.0714285714285714	9.84775808133472	8.02731433243478	1.57375308325228e-06	1.17880738611426e-05	5.28709948920811e-06	IL1B/PPARG/IL1A/PON1/SPP1/MIF/NFKBIA/PLA2G10	8
BP	GO:0050999	regulation of nitric-oxide synthase activity	5/137	28/18888	0.178571428571429	24.6193952033368	10.690708826382	1.60337960260359e-06	1.19870253273041e-05	5.37633172574738e-06	AKT1/EGFR/IL1B/IL1A/HIF1A	5
BP	GO:0035296	regulation of tube diameter	9/137	152/18888	0.0592105263157895	8.16327314636957	7.57921843480628	1.6650419297013e-06	1.24005979907278e-05	5.56182427044084e-06	CHRM3/TNF/CRP/EGFR/MMP2/ACE/NOS3/SOD2/PTGS2	9
BP	GO:0097746	blood vessel diameter maintenance	9/137	152/18888	0.0592105263157895	8.16327314636957	7.57921843480628	1.6650419297013e-06	1.24005979907278e-05	5.56182427044084e-06	CHRM3/TNF/CRP/EGFR/MMP2/ACE/NOS3/SOD2/PTGS2	9
BP	GO:0009755	hormone-mediated signaling pathway	10/137	196/18888	0.0510204081632653	7.03411291523909	7.25843745827453	1.6845660627039e-06	1.25221545725708e-05	5.61634392728577e-06	NR3C1/MAPK1/PPARG/NR3C2/PARP1/RELA/AR/ESR1/PPARD/REN	10
BP	GO:0001933	negative regulation of protein phosphorylation	12/137	296/18888	0.0405405405405405	5.58926810021701	6.80230007634572	1.70765884605783e-06	1.26697269223646e-05	5.68253198348616e-06	PTEN/AKT1/IL1B/IFNG/PPARG/TGFB1/IL2/BAX/XDH/HSPB1/CDKN1A/GSTP1	12
BP	GO:0035150	regulation of tube size	9/137	153/18888	0.0588235294117647	8.10991841992271	7.5476723895008	1.75834133376953e-06	1.30210504072705e-05	5.84010498815796e-06	CHRM3/TNF/CRP/EGFR/MMP2/ACE/NOS3/SOD2/PTGS2	9
BP	GO:0031334	positive regulation of protein-containing complex assembly	10/137	197/18888	0.050761421319797	6.99840675830894	7.23406344858743	1.76381260680711e-06	1.30368757894439e-05	5.84720287123799e-06	TP53/TNF/IFNG/VEGFA/TGFB1/BAX/HSP90AA1/MAPK8/LGALS3/SYK	10
BP	GO:0032306	regulation of prostaglandin secretion	4/137	13/18888	0.307692307692308	42.4211117349804	12.7696649946509	1.80023857018104e-06	1.32559939913519e-05	5.9454801425743e-06	IL1B/IL1A/MIF/PLA2G10	4
BP	GO:0032308	positive regulation of prostaglandin secretion	4/137	13/18888	0.307692307692308	42.4211117349804	12.7696649946509	1.80023857018104e-06	1.32559939913519e-05	5.9454801425743e-06	IL1B/IL1A/MIF/PLA2G10	4
BP	GO:0050769	positive regulation of neurogenesis	11/137	246/18888	0.0447154471544715	6.1648566850632	6.96962054158344	1.82908936103379e-06	1.3443119176019e-05	6.02940814301998e-06	TNF/IL6/EGFR/IL1B/IFNG/VEGFA/TGFB1/ACE/HIF1A/MME/RELA	11
BP	GO:0002534	cytokine production involved in inflammatory response	7/137	80/18888	0.0875	12.063503649635	8.47609714854899	1.85070377213658e-06	1.35510332379289e-05	6.07780895797268e-06	TNF/IL6/F2/NOS2/HIF1A/PLA2G10/MAPK14	7
BP	GO:1900015	regulation of cytokine production involved in inflammatory response	7/137	80/18888	0.0875	12.063503649635	8.47609714854899	1.85070377213658e-06	1.35510332379289e-05	6.07780895797268e-06	TNF/IL6/F2/NOS2/HIF1A/PLA2G10/MAPK14	7
BP	GO:0045807	positive regulation of endocytosis	9/137	155/18888	0.0580645161290323	8.00527431127855	7.48543227378747	1.95854289407586e-06	1.4313836852031e-05	6.41993597940064e-06	INSR/IFNG/VEGFA/CCL2/EGF/SELE/AXL/SYK/CDC42	9
BP	GO:0046942	carboxylic acid transport	13/137	358/18888	0.0363128491620112	5.00640215308078	6.54165899042564	2.11314466082633e-06	1.54149172086399e-05	6.91378437733046e-06	ABCB1/TNF/AKT1/IL1B/PPARG/ACE/IL1A/NOS2/MIF/PLA2G10/PPARD/PTGS2/SYK	13
BP	GO:0001558	regulation of cell growth	14/137	418/18888	0.0334928229665072	4.61760905249188	6.39301733064154	2.17280478094755e-06	1.57912020325371e-05	7.08255285669854e-06	TP53/AKT1/EGFR/VEGFA/TGFB1/F2/IL2/BCL2/SPP1/ADAM17/S100A9/CDKN1A/ERBB2/CDC42	14
BP	GO:0043254	regulation of protein-containing complex assembly	14/137	418/18888	0.0334928229665072	4.61760905249188	6.39301733064154	2.17280478094755e-06	1.57912020325371e-05	7.08255285669854e-06	TP53/TNF/IFNG/VEGFA/TGFB1/SELP/BAX/HSPA5/HSP90AA1/MAPK8/LGALS3/HSPA8/SYK/CDC42	14
BP	GO:0015849	organic acid transport	13/137	359/18888	0.0362116991643454	4.99245674318362	6.52816330373425	2.17910646617455e-06	1.58076183353293e-05	7.08991577511338e-06	ABCB1/TNF/AKT1/IL1B/PPARG/ACE/IL1A/NOS2/MIF/PLA2G10/PPARD/PTGS2/SYK	13
BP	GO:0043406	positive regulation of MAP kinase activity	7/137	82/18888	0.0853658536585366	11.7692718533025	8.35361791629085	2.18834028184564e-06	1.58159159002153e-05	7.09363733739632e-06	TNF/INSR/EGFR/IL1B/VEGFA/EGF/ERBB2	7
BP	GO:0061844	antimicrobial humoral immune response mediated by antimicrobial peptide	7/137	82/18888	0.0853658536585366	11.7692718533025	8.35361791629085	2.18834028184564e-06	1.58159159002153e-05	7.09363733739632e-06	CXCL8/F2/CXCL10/S100A9/RNASE3/CXCL11/REG1A	7
BP	GO:0022408	negative regulation of cell-cell adhesion	10/137	203/18888	0.0492610837438424	6.79155729747222	7.09130854364691	2.31109845765855e-06	1.66723154417803e-05	7.47774331027217e-06	IL10/AKT1/VEGFA/TGFB1/IL2/CASP3/IRF1/CTSG/LGALS3/ERBB2	10
BP	GO:0050830	defense response to Gram-positive bacterium	8/137	118/18888	0.0677966101694915	9.34702461957194	7.77445794480833	2.33455770071169e-06	1.67796334738652e-05	7.52587679834688e-06	TNF/IL6/CRP/IL1B/ADAM17/RNASE3/LYZ/CTSG	8
BP	GO:1904659	glucose transmembrane transport	8/137	118/18888	0.0677966101694915	9.34702461957194	7.77445794480833	2.33455770071169e-06	1.67796334738652e-05	7.52587679834688e-06	TNF/INSR/AKT1/IL1B/ACE/MAPK14/PPARD/PRKCB	8
BP	GO:0072332	intrinsic apoptotic signaling pathway by p53 class mediator	7/137	83/18888	0.0843373493975904	11.6274733972386	8.29396046074147	2.37555786564334e-06	1.70429931278265e-05	7.64399691774371e-06	TP53/BCL2/MYC/BAX/MIF/CDKN1A/E2F1	7
BP	GO:0048146	positive regulation of fibroblast proliferation	6/137	54/18888	0.111111111111111	15.3187347931873	9.00657767843366	2.53122407382084e-06	1.80933932881892e-05	8.11511460980568e-06	EGFR/MYC/MIF/CDKN1A/E2F1/ESR1	6
BP	GO:1904645	response to amyloid-beta	6/137	54/18888	0.111111111111111	15.3187347931873	9.00657767843366	2.53122407382084e-06	1.80933932881892e-05	8.11511460980568e-06	TNF/MMP2/ICAM1/MMP9/VCAM1/PARP1	6
BP	GO:0032869	cellular response to insulin stimulus	10/137	206/18888	0.0485436893203883	6.69265112323719	7.02208450973482	2.63631629943268e-06	1.88102130123755e-05	8.43661727786179e-06	INSR/AKT1/IL1B/MAPK1/PPARG/STAT1/PARP1/RELA/CTSD/PRKCB	10
BP	GO:0002718	regulation of cytokine production involved in immune response	8/137	120/18888	0.0666666666666667	9.19124087591241	7.69415	2.6492337786087e-06	1.88679491336248e-05	8.4625126548981e-06	IL10/TNF/IL6/IL1B/TGFB1/MIF/AXL/SYK	8
BP	GO:0001516	prostaglandin biosynthetic process	5/137	31/18888	0.161290322580645	22.2368730868849	10.1149717667582	2.72397816982823e-06	1.92948453696166e-05	8.65398098957633e-06	IL1B/MIF/PTGS1/PLA2G10/PTGS2	5
BP	GO:0046457	prostanoid biosynthetic process	5/137	31/18888	0.161290322580645	22.2368730868849	10.1149717667582	2.72397816982823e-06	1.92948453696166e-05	8.65398098957633e-06	IL1B/MIF/PTGS1/PLA2G10/PTGS2	5
BP	GO:0090322	regulation of superoxide metabolic process	5/137	31/18888	0.161290322580645	22.2368730868849	10.1149717667582	2.72397816982823e-06	1.92948453696166e-05	8.65398098957633e-06	CRP/EGFR/TGFB1/GSTP1/SYK	5
BP	GO:0002440	production of molecular mediator of immune response	12/137	310/18888	0.0387096774193548	5.33684954085237	6.58089982256565	2.75657455314129e-06	1.9490427672301e-05	8.74170211389242e-06	IL10/TNF/CD40LG/IL6/IL1B/TGFB1/IL2/MIF/AXL/GPI/SYK/TREM1	12
BP	GO:0051591	response to cAMP	7/137	85/18888	0.0823529411764706	11.3538857878918	8.17765560572915	2.79030372498039e-06	1.96811461236953e-05	8.82724173968943e-06	CYP1B1/THBD/STAT1/FOS/RELA/DUOX2/REN	7
BP	GO:0002699	positive regulation of immune effector process	11/137	257/18888	0.0428015564202335	5.90099122383482	6.76179438420315	2.79361537049895e-06	1.96811461236953e-05	8.82724173968943e-06	IL10/TNF/IL6/IL1B/IFNG/TGFB1/IL2/NOS2/MIF/GPI/SYK	11
BP	GO:0008645	hexose transmembrane transport	8/137	121/18888	0.0661157024793388	9.11528020751644	7.65470282410504	2.81962660829357e-06	1.97906331802462e-05	8.87634806253604e-06	TNF/INSR/AKT1/IL1B/ACE/MAPK14/PPARD/PRKCB	8
BP	GO:0043524	negative regulation of neuron apoptotic process	9/137	162/18888	0.0555555555555556	7.65936739659367	7.27608108319512	2.82195553578373e-06	1.97906331802462e-05	8.87634806253604e-06	IL10/CCL2/BCL2/BAX/HIF1A/SOD2/BCL2L1/AXL/GPI	9
BP	GO:0030857	negative regulation of epithelial cell differentiation	6/137	55/18888	0.109090909090909	15.0402123424021	8.91301883821067	2.82434100117068e-06	1.97906331802462e-05	8.87634806253604e-06	IFNG/VEGFA/STAT1/MMP9/IL1A/XDH	6
BP	GO:0045471	response to ethanol	8/137	122/18888	0.0655737704918033	9.04056479597942	7.61570603979747	2.99923899655612e-06	2.09785768810992e-05	9.40915576360513e-06	TNF/IL2/CASP8/VCAM1/FOS/SOD2/CDK1/PRKCB	8
BP	GO:0048678	response to axon injury	7/137	86/18888	0.0813953488372093	11.2218638601256	8.12095026553252	3.01932290577054e-06	2.10813438599336e-05	9.45524804701826e-06	MMP2/BCL2/SPP1/BAX/SOD2/AXL/CDK1	7
BP	GO:0032409	regulation of transporter activity	11/137	260/18888	0.0423076923076923	5.8329028635598	6.70719885561504	3.12402783065935e-06	2.17735273045955e-05	9.76570103364008e-06	CHRM3/ABCB1/IFNG/PPARG/CCL2/PRKACA/MMP9/PON1/BCL2/CTSS/PIM1	11
BP	GO:0015749	monosaccharide transmembrane transport	8/137	123/18888	0.0650406504065041	8.96706426918284	7.57715460533078	3.18847447874917e-06	2.2143757037139e-05	9.93175372832779e-06	TNF/INSR/AKT1/IL1B/ACE/MAPK14/PPARD/PRKCB	8
BP	GO:0071675	regulation of mononuclear cell migration	8/137	123/18888	0.0650406504065041	8.96706426918284	7.57715460533078	3.18847447874917e-06	2.2143757037139e-05	9.93175372832779e-06	TNF/AKT1/MAPK1/CCL2/CCL5/CXCL10/ADAM17/LGALS3	8
BP	GO:1902806	regulation of cell cycle G1/S phase transition	10/137	211/18888	0.0473933649289099	6.53405749472446	6.90972704712852	3.26715580375071e-06	2.26499631075625e-05	1.01587935219274e-05	TP53/PTEN/AKT1/EGFR/CCL2/BCL2/ADAM17/CYP1A1/CDKN1A/E2F1	10
BP	GO:0042326	negative regulation of phosphorylation	12/137	316/18888	0.0379746835443038	5.23551695463365	6.49008201775653	3.3578662458446e-06	2.32312370455981e-05	1.0419502198941e-05	PTEN/AKT1/IL1B/IFNG/PPARG/TGFB1/IL2/BAX/XDH/HSPB1/CDKN1A/GSTP1	12
BP	GO:1903522	regulation of blood circulation	11/137	262/18888	0.0419847328244275	5.78837688750209	6.6712732453164	3.36288495340372e-06	2.32312370455981e-05	1.0419502198941e-05	CHRM3/CHRM2/TNF/EGFR/MMP2/ACE/NOS3/PRKACA/HSP90AA1/PTGS2/SCN5A	11
BP	GO:0090068	positive regulation of cell cycle process	11/137	263/18888	0.0418250950570342	5.76636784990702	6.65344922316018	3.48820312610564e-06	2.40496514813445e-05	1.07865713737838e-05	TNF/INSR/AKT1/EGFR/IL1B/IL1A/EGF/ADAM17/CYP1A1/CDK1/CDC42	11
BP	GO:0001541	ovarian follicle development	6/137	57/18888	0.105263157894737	14.5124855935459	8.73304176049524	3.49365781110068e-06	2.40496514813445e-05	1.07865713737838e-05	MMP2/VEGFA/BCL2/BAX/BCL2L1/ESR1	6
BP	GO:0009166	nucleotide catabolic process	9/137	167/18888	0.0538922155688623	7.43004501945015	7.13406865344753	3.62331204978029e-06	2.48983306056959e-05	1.11672146423716e-05	INSR/IFNG/PRKACA/HIF1A/XDH/GPI/TPI1/PNP/HPRT1	9
BP	GO:0001822	kidney development	12/137	319/18888	0.0376175548589342	5.1862801180697	6.44553432187031	3.69977547082841e-06	2.53347146951648e-05	1.13629383987467e-05	VEGFA/ACE/STAT1/MMP9/BCL2/MYC/BAX/MME/CASP9/APAF1/REN/ODC1	12
BP	GO:0019058	viral life cycle	12/137	319/18888	0.0376175548589342	5.1862801180697	6.44553432187031	3.69977547082841e-06	2.53347146951648e-05	1.13629383987467e-05	TNF/INSR/EGFR/CXCL8/CCL2/ICAM1/CCL5/BCL2/CTSB/AXL/CDK1/ISG20	12
BP	GO:0006805	xenobiotic metabolic process	8/137	126/18888	0.0634920634920635	8.7535627389642	7.46408487123885	3.81815683862805e-06	2.60996385297827e-05	1.17060163657607e-05	CYP3A4/ABCB1/CYP1B1/CYP2C9/GSTM1/CYP1A1/BCHE/GSTP1	8
BP	GO:0019369	arachidonic acid metabolic process	6/137	58/18888	0.103448275862069	14.2622703246917	8.6464188435789	3.87369675424874e-06	2.63411379288915e-05	1.18143318857271e-05	CYP1B1/CYP2C9/CYP1A1/PTGS1/PLA2G10/PTGS2	6
BP	GO:0042306	regulation of protein import into nucleus	6/137	58/18888	0.103448275862069	14.2622703246917	8.6464188435789	3.87369675424874e-06	2.63411379288915e-05	1.18143318857271e-05	IFNG/TGFB1/HSP90AA1/CDK1/MAPK14/PTGS2	6
BP	GO:0061756	leukocyte adhesion to vascular endothelial cell	6/137	58/18888	0.103448275862069	14.2622703246917	8.6464188435789	3.87369675424874e-06	2.63411379288915e-05	1.18143318857271e-05	TNF/IL6/SELP/SELE/VCAM1/RELA	6
BP	GO:0002064	epithelial cell development	10/137	216/18888	0.0462962962962963	6.38280616382806	6.80095	4.02526787645595e-06	2.73180312119852e-05	1.22524808181902e-05	TNF/AKT1/IL1B/VEGFA/ICAM1/IL1A/HIF1A/AR/CDKN1A/ESR1	10
BP	GO:0032386	regulation of intracellular transport	11/137	267/18888	0.0411985018726592	5.67998031657508	6.58305849246175	4.03133094867403e-06	2.73180312119852e-05	1.22524808181902e-05	CHRM1/IL1B/MAPK1/IFNG/TGFB1/PRKACA/HSP90AA1/CDK1/MAPK14/PTGS2/CDC42	11
BP	GO:0031640	killing of cells of another organism	7/137	90/18888	0.0777777777777778	10.7231143552311	7.90315286943741	4.09850529689404e-06	2.76772982916333e-05	1.24136166250804e-05	IFNG/F2/NOS2/LYZ/CTSG/SYK/TREM1	7
BP	GO:0141061	disruption of cell in another organism	7/137	90/18888	0.0777777777777778	10.7231143552311	7.90315286943741	4.09850529689404e-06	2.76772982916333e-05	1.24136166250804e-05	IFNG/F2/NOS2/LYZ/CTSG/SYK/TREM1	7
BP	GO:0001782	B cell homeostasis	5/137	34/18888	0.147058823529412	20.2747960498068	9.61517195346933	4.38369686927745e-06	2.94478371915663e-05	1.32077256053707e-05	CASP3/BCL2/BAX/MIF/HIF1A	5
BP	GO:0034405	response to fluid shear stress	5/137	34/18888	0.147058823529412	20.2747960498068	9.61517195346933	4.38369686927745e-06	2.94478371915663e-05	1.32077256053707e-05	AKT1/MMP2/ACE/NOS3/PTGS2	5
BP	GO:1902176	negative regulation of oxidative stress-induced intrinsic apoptotic signaling pathway	5/137	34/18888	0.147058823529412	20.2747960498068	9.61517195346933	4.38369686927745e-06	2.94478371915663e-05	1.32077256053707e-05	IL10/AKT1/HIF1A/SOD2/HSPB1	5
BP	GO:0007254	JNK cascade	9/137	171/18888	0.0526315789473684	7.25624279677295	7.02462405640108	4.39834703833113e-06	2.94478371915663e-05	1.32077256053707e-05	TNF/EGFR/IL1B/IL1A/NCF1/MAPK8/BIRC7/GSTP1/CDC42	9
BP	GO:0030856	regulation of epithelial cell differentiation	9/137	171/18888	0.0526315789473684	7.25624279677295	7.02462405640108	4.39834703833113e-06	2.94478371915663e-05	1.32077256053707e-05	TNF/IL1B/IFNG/VEGFA/STAT1/MMP9/IL1A/VDR/XDH	9
BP	GO:0031649	heat generation	4/137	16/18888	0.25	34.4671532846715	11.4472022772525	4.50555165175329e-06	3.00626398606747e-05	1.34834723402568e-05	TNF/IL1B/IL1A/PTGS2	4
BP	GO:0070230	positive regulation of lymphocyte apoptotic process	4/137	16/18888	0.25	34.4671532846715	11.4472022772525	4.50555165175329e-06	3.00626398606747e-05	1.34834723402568e-05	TP53/IL10/CCL5/BAX	4
BP	GO:0014009	glial cell proliferation	6/137	60/18888	0.1	13.7868613138686	8.47943747288261	4.73479455546779e-06	3.14847733195222e-05	1.41213170952548e-05	CHRM1/TP53/TNF/IL6/EGFR/IL1B	6
BP	GO:1905517	macrophage migration	6/137	60/18888	0.1	13.7868613138686	8.47943747288261	4.73479455546779e-06	3.14847733195222e-05	1.41213170952548e-05	MAPK1/MMP2/CCL2/CCL5/MIF/LGALS3	6
BP	GO:0050680	negative regulation of epithelial cell proliferation	9/137	173/18888	0.0520231213872832	7.17235559681026	6.97121747100498	4.83652430656444e-06	3.21066384357673e-05	1.44002314265684e-05	TNF/PPARG/TGFB1/CCL2/STAT1/VDR/XDH/AR/PPARD	9
BP	GO:0043086	negative regulation of catalytic activity	14/137	449/18888	0.0311804008908686	4.29879862793231	6.04699835450411	4.96524733263812e-06	3.2905283170534e-05	1.4758433641704e-05	TP53/PTEN/TNF/AKT1/IL1B/IFNG/PPARG/VEGFA/MMP9/HSPB1/LGALS3/CDKN1A/GSTP1/SERPINA1	14
BP	GO:0072001	renal system development	12/137	329/18888	0.0364741641337386	5.02864242451135	6.30099219671956	5.07166575807511e-06	3.33717944991791e-05	1.49676698440254e-05	VEGFA/ACE/STAT1/MMP9/BCL2/MYC/BAX/MME/CASP9/APAF1/REN/ODC1	12
BP	GO:0034110	regulation of homotypic cell-cell adhesion	5/137	35/18888	0.142857142857143	19.6955161626694	9.46260704132295	5.08462867594259e-06	3.33717944991791e-05	1.49676698440254e-05	IL6/CCL5/CTSG/PRKCA/SYK	5
BP	GO:0048147	negative regulation of fibroblast proliferation	5/137	35/18888	0.142857142857143	19.6955161626694	9.46260704132295	5.08462867594259e-06	3.33717944991791e-05	1.49676698440254e-05	TP53/MYC/BAX/SOD2/GSTP1	5
BP	GO:0038127	ERBB signaling pathway	8/137	131/18888	0.0610687022900763	8.41945729091213	7.28376045816294	5.10175360581089e-06	3.33717944991791e-05	1.49676698440254e-05	AKT1/EGFR/MAPK1/TGFB1/MMP9/EGF/ADAM17/ERBB2	8
BP	GO:0002690	positive regulation of leukocyte chemotaxis	7/137	93/18888	0.0752688172043011	10.3772074405463	7.74860262882094	5.10392151163915e-06	3.33717944991791e-05	1.49676698440254e-05	IL6/MAPK1/VEGFA/CXCL8/CCL5/CXCL10/ADAM17	7
BP	GO:0007589	body fluid secretion	7/137	93/18888	0.0752688172043011	10.3772074405463	7.74860262882094	5.10392151163915e-06	3.33717944991791e-05	1.49676698440254e-05	CHRM1/CHRM3/EGFR/VEGFA/VDR/HIF1A/XDH	7
BP	GO:0050886	endocrine process	7/137	93/18888	0.0752688172043011	10.3772074405463	7.74860262882094	5.10392151163915e-06	3.33717944991791e-05	1.49676698440254e-05	IL1B/PPARG/ACE/NOS3/SPP1/CTSG/REN	7
BP	GO:0141060	disruption of anatomical structure in another organism	7/137	93/18888	0.0752688172043011	10.3772074405463	7.74860262882094	5.10392151163915e-06	3.33717944991791e-05	1.49676698440254e-05	IFNG/F2/NOS2/LYZ/CTSG/SYK/TREM1	7
BP	GO:0045599	negative regulation of fat cell differentiation	6/137	61/18888	0.0983606557377049	13.5608471939691	8.39890841110397	5.22022916703026e-06	3.40752855477267e-05	1.52831944333054e-05	TNF/IL6/TGFB1/SOD2/E2F1/RUNX1T1	6
BP	GO:0048638	regulation of developmental growth	12/137	330/18888	0.0363636363636364	5.01340411413404	6.2868606341521	5.23081016471172e-06	3.4087446240038e-05	1.52886486568592e-05	PTEN/INSR/AKT1/VEGFA/BCL2/SPP1/PIM1/AR/CDK1/CDKN1A/MAPK14/PPARD	12
BP	GO:1901292	nucleoside phosphate catabolic process	9/137	176/18888	0.0511363636363636	7.05009953550099	6.8926830095719	5.56386441807499e-06	3.61975205901385e-05	1.6235043559879e-05	INSR/IFNG/PRKACA/HIF1A/XDH/GPI/TPI1/PNP/HPRT1	9
BP	GO:0072594	establishment of protein localization to organelle	14/137	454/18888	0.0308370044052863	4.25145503070838	5.99412014413727	5.63530676561297e-06	3.66014110524032e-05	1.64161935154943e-05	TP53/AKT1/IFNG/TGFB1/BAX/HSPA5/NFKBIA/HSP90AA1/HSPA8/CDK1/CDKN1A/MAPK14/PTGS2/SYK	14
BP	GO:0002763	positive regulation of myeloid leukocyte differentiation	6/137	62/18888	0.0967741935483871	13.3421238521309	8.32024806120763	5.74532687564408e-06	3.71924306022655e-05	1.66812732220687e-05	TNF/IFNG/TGFB1/CASP8/FOS/PRKCA	6
BP	GO:0033619	membrane protein proteolysis	6/137	62/18888	0.0967741935483871	13.3421238521309	8.32024806120763	5.74532687564408e-06	3.71924306022655e-05	1.66812732220687e-05	IL10/TNF/IL1B/IFNG/TGFB1/ADAM17	6
BP	GO:0072330	monocarboxylic acid biosynthetic process	10/137	225/18888	0.0444444444444444	6.12749391727494	6.61355914349209	5.77930318798432e-06	3.73505379587086e-05	1.6752186361343e-05	CYP3A4/CYP2C9/IL1B/MIF/GSTM1/CYP1A1/PTGS1/PLA2G10/GSTP1/PTGS2	10
BP	GO:0046394	carboxylic acid biosynthetic process	12/137	334/18888	0.0359281437125748	4.9533633463001	6.23089948613381	5.9122152719758e-06	3.81464714742993e-05	1.71091725605553e-05	CYP3A4/CYP2C9/IL1B/MIF/CASP1/GSTM1/CYP1A1/PTGS1/PLA2G10/GSTP1/PTGS2/SYK	12
BP	GO:0007611	learning or memory	11/137	278/18888	0.039568345323741	5.45523289397679	6.39659979195226	5.92424305250383e-06	3.81611043414991e-05	1.71157355856609e-05	PTEN/INSR/EGFR/MAPK1/CASP3/HIF1A/FOS/MME/GPI/BCHE/PTGS2	11
BP	GO:0002702	positive regulation of production of molecular mediator of immune response	8/137	134/18888	0.0597014925373134	8.23096197842902	7.18010967589122	6.03454611394345e-06	3.8807689647235e-05	1.74057372330848e-05	IL10/IL6/IL1B/TGFB1/IL2/MIF/GPI/SYK	8
BP	GO:0003073	regulation of systemic arterial blood pressure	7/137	96/18888	0.0729166666666667	10.0529197080292	7.60094062457043	6.30665609352608e-06	4.04910103870065e-05	1.81607277708313e-05	TNF/ACE/NOS3/SOD2/CTSG/AR/REN	7
BP	GO:0038061	non-canonical NF-kappaB signal transduction	8/137	135/18888	0.0592592592592593	8.16999188969992	7.14627506835691	6.3758859860516e-06	4.08683839433799e-05	1.83299845604175e-05	TNF/AKT1/EGFR/IL1B/CHUK/NR3C2/NFKBIA/RELA	8
BP	GO:0016053	organic acid biosynthetic process	12/137	337/18888	0.0356083086053412	4.90926812363274	6.18951048282209	6.47333217839196e-06	4.14250880810353e-05	1.85796733727298e-05	CYP3A4/CYP2C9/IL1B/MIF/CASP1/GSTM1/CYP1A1/PTGS1/PLA2G10/GSTP1/PTGS2/SYK	12
BP	GO:1905475	regulation of protein localization to membrane	9/137	180/18888	0.05	6.89343065693431	6.79079009742985	6.67817178942928e-06	4.2666097543576e-05	1.91362817357915e-05	TNF/AKT1/EGFR/IFNG/TGFB1/BCL2L1/LGALS3/AR/ERBB2	9
BP	GO:0070229	negative regulation of lymphocyte apoptotic process	5/137	37/18888	0.135135135135135	18.6309	9.17566498068789	6.74833533085872e-06	4.30254292139203e-05	1.92974465124219e-05	IL2/CCL5/BCL2/MIF/HIF1A	5
BP	GO:0072526	pyridine-containing compound catabolic process	7/137	97/18888	0.0721649484536082	9.94928136052374	7.55315922482728	6.75642289957726e-06	4.30254292139203e-05	1.92974465124219e-05	INSR/IFNG/PRKACA/HIF1A/GPI/TPI1/PNP	7
BP	GO:0010803	regulation of tumor necrosis factor-mediated signaling pathway	6/137	64/18888	0.09375	12.9251824817518	8.16824245296443	6.92430394562356e-06	4.38801109033843e-05	1.96807820070099e-05	CASP8/CASP1/ADAM17/BIRC7/GSTP1/SYK	6
BP	GO:0022617	extracellular matrix disassembly	6/137	64/18888	0.09375	12.9251824817518	8.16824245296443	6.92430394562356e-06	4.38801109033843e-05	1.96807820070099e-05	IL6/MMP2/TGFB1/MMP9/CTSG/CTSS	6
BP	GO:0030888	regulation of B cell proliferation	6/137	64/18888	0.09375	12.9251824817518	8.16824245296443	6.92430394562356e-06	4.38801109033843e-05	1.96807820070099e-05	IL10/IL2/CASP3/BCL2/MIF/CDKN1A	6
BP	GO:0034219	carbohydrate transmembrane transport	8/137	137/18888	0.0583941605839416	8.05072193510576	7.07964059564696	7.1077547423111e-06	4.48971260782495e-05	2.01369261128991e-05	TNF/INSR/AKT1/IL1B/ACE/MAPK14/PPARD/PRKCB	8
BP	GO:1904375	regulation of protein localization to cell periphery	8/137	137/18888	0.0583941605839416	8.05072193510576	7.07964059564696	7.1077547423111e-06	4.48971260782495e-05	2.01369261128991e-05	TNF/AKT1/EGFR/IFNG/TGFB1/BCL2L1/LGALS3/AR	8
BP	GO:0010657	muscle cell apoptotic process	7/137	98/18888	0.0714285714285714	9.84775808133472	7.50606712879041	7.23252792160319e-06	4.56115873765621e-05	2.04573709972681e-05	TP53/IFNG/PPARG/HSP90AA1/SOD2/APAF1/ESR1	7
BP	GO:0001701	in utero embryonic development	13/137	401/18888	0.0324189526184539	4.46955603691501	6.00264180768883	7.25964467926387e-06	4.57088739064762e-05	2.05010052303646e-05	TP53/IL10/AKT1/EGFR/MAPK1/VEGFA/NOS3/CASP8/HIF1A/BCL2L1/GPI/AR/CDKN1A	13
BP	GO:0006109	regulation of carbohydrate metabolic process	9/137	182/18888	0.0494505494505494	6.81767867169327	6.74100293096109	7.30356770215719e-06	4.59114947193483e-05	2.05918832150853e-05	NR3C1/TP53/INSR/AKT1/IFNG/TGFB1/PRKACA/EGF/HIF1A	9
BP	GO:0035234	ectopic germ cell programmed cell death	4/137	18/18888	0.222222222222222	30.6374695863747	10.7527854547277	7.49035028576265e-06	4.69922833111185e-05	2.10766305010966e-05	IL1B/IL1A/BAX/BCL2L1	4
BP	GO:0046328	regulation of JNK cascade	8/137	138/18888	0.0579710144927536	7.99238337035862	7.04682838895433	7.49953575093041e-06	4.69922833111185e-05	2.10766305010966e-05	TNF/EGFR/IL1B/IL1A/NCF1/BIRC7/GSTP1/CDC42	8
BP	GO:0019318	hexose metabolic process	10/137	232/18888	0.0431034482758621	5.9426126352882	6.47471799862202	7.56855969803002e-06	4.72899528382166e-05	2.12101390304129e-05	NR3C1/TP53/TNF/INSR/AKT1/PRKACA/GPI/TPI1/MAPK14/PPARD	10
BP	GO:0090303	positive regulation of wound healing	6/137	65/18888	0.0923076923076923	12.7263335204941	8.09476147802232	7.5833249180465e-06	4.72899528382166e-05	2.12101390304129e-05	THBD/F2/F3/PLAT/CLDN4/DUOX2	6
BP	GO:1905330	regulation of morphogenesis of an epithelium	6/137	65/18888	0.0923076923076923	12.7263335204941	8.09476147802232	7.5833249180465e-06	4.72899528382166e-05	2.12101390304129e-05	TNF/VEGFA/EGF/CXCL10/AR/ESR1	6
BP	GO:0001101	response to acid chemical	8/137	139/18888	0.0575539568345324	7.93488420942078	7.0143448988514	7.9094121374086e-06	4.92449067790886e-05	2.20869604775775e-05	TNF/EGFR/MMP2/VEGFA/CASP3/CHUK/RELA/BCL2L1	8
BP	GO:1903035	negative regulation of response to wounding	7/137	100/18888	0.07	9.65080291970803	7.41388250773512	8.26860484295359e-06	5.13994355102521e-05	2.30532937299986e-05	PTEN/TNF/THBD/F2/NOS3/PLAT/SPP1	7
BP	GO:0015909	long-chain fatty acid transport	6/137	66/18888	0.0909090909090909	12.5335102853351	8.02287724564086	8.29229559317302e-06	5.14648821735024e-05	2.30826473821658e-05	AKT1/PPARG/ACE/MIF/PLA2G10/SYK	6
BP	GO:0033028	myeloid cell apoptotic process	5/137	39/18888	0.128205128205128	17.6754632229085	8.91036736735717	8.81045177717771e-06	5.45077000771595e-05	2.44473895082912e-05	IL6/CCL5/BCL2/MIF/ADAM17	5
BP	GO:0070232	regulation of T cell apoptotic process	5/137	39/18888	0.128205128205128	17.6754632229085	8.91036736735717	8.81045177717771e-06	5.45077000771595e-05	2.44473895082912e-05	TP53/CCL5/BCL2/HIF1A/LGALS3	5
BP	GO:0034605	cellular response to heat	6/137	67/18888	0.0895522388059701	12.3464429676435	7.9525305353035	9.05403976650715e-06	5.592621719912e-05	2.50836122906808e-05	PRKACA/IL1A/CXCL10/HSP90AA1/CDKN1A/PTGS2	6
BP	GO:0034765	regulation of monoatomic ion transmembrane transport	12/137	349/18888	0.0343839541547278	4.74046807353649	6.02871939596277	9.21391554296598e-06	5.68239901782287e-05	2.54862747710133e-05	ABCB1/IFNG/CCL2/F2/PRKACA/MMP9/BCL2/CXCL10/BAX/CXCL11/CTSS/SCN5A	12
BP	GO:0032305	positive regulation of icosanoid secretion	4/137	19/18888	0.210526315789474	29.0249711870918	10.4466510894441	9.43446445848778e-06	5.80011887306403e-05	2.601426313777e-05	IL1B/IL1A/MIF/PLA2G10	4
BP	GO:0045780	positive regulation of bone resorption	4/137	19/18888	0.210526315789474	29.0249711870918	10.4466510894441	9.43446445848778e-06	5.80011887306403e-05	2.601426313777e-05	EGFR/SPP1/PRKCA/SYK	4
BP	GO:2001235	positive regulation of apoptotic signaling pathway	8/137	143/18888	0.0559440559440559	7.71292940636006	6.88758439384174	9.74356723621865e-06	5.98074535221584e-05	2.68243956300756e-05	TP53/TNF/MMP2/MYC/BAX/S100A9/APAF1/CTSS	8
BP	GO:0072577	endothelial cell apoptotic process	6/137	68/18888	0.0882352941176471	12.1648776298841	7.88366517294729	9.87148536705818e-06	6.04976611053252e-05	2.71339624179491e-05	IL10/TNF/CD40LG/TGFB1/CCL2/ICAM1	6
BP	GO:0061138	morphogenesis of a branching epithelium	9/137	189/18888	0.0476190476190476	6.56517205422315	6.57248893669801	9.90354385527765e-06	6.05991494117928e-05	2.71794812007126e-05	IL10/TNF/VEGFA/EGF/BCL2/VDR/MYC/AR/ESR1	9
BP	GO:0150077	regulation of neuroinflammatory response	5/137	40/18888	0.125	17.2335766423358	8.78498717251892	1.0010683002864e-05	6.11590164706224e-05	2.74305886229794e-05	TNF/IL6/IL1B/MMP9/PTGS2	5
BP	GO:0051962	positive regulation of nervous system development	11/137	294/18888	0.0374149659863946	5.15834947117533	6.14239574215047	1.00488062148546e-05	6.12961502341367e-05	2.74920948418554e-05	TNF/IL6/EGFR/IL1B/IFNG/VEGFA/TGFB1/ACE/HIF1A/MME/RELA	11
BP	GO:0034101	erythrocyte homeostasis	8/137	144/18888	0.0555555555555556	7.65936739659367	6.85666040892583	1.02543572695507e-05	6.23554228988232e-05	2.79671919637742e-05	VEGFA/STAT1/CASP3/HIF1A/AXL/PLA2G10/GPI/MAPK14	8
BP	GO:0046887	positive regulation of hormone secretion	8/137	144/18888	0.0555555555555556	7.65936739659367	6.85666040892583	1.02543572695507e-05	6.23554228988232e-05	2.79671919637742e-05	CHRM3/EGFR/PPARG/F2/PRKACA/SPP1/HIF1A/PRKCB	8
BP	GO:0009895	negative regulation of catabolic process	12/137	353/18888	0.0339943342776204	4.68675172142842	5.97674196061531	1.03303085940181e-05	6.27197307493958e-05	2.81305886198663e-05	TP53/IL10/TNF/AKT1/EGFR/IL1B/PRKACA/BCL2/NOS2/RELA/E2F1/MAPK14	12
BP	GO:0002274	myeloid leukocyte activation	10/137	241/18888	0.04149377593361	5.7206893418542	6.30433110184463	1.05586679022149e-05	6.40068085235044e-05	2.87078592004734e-05	IL10/TNF/IL6/IFNG/CXCL8/CCL5/MIF/CTSG/PLA2G10/SYK	10
BP	GO:0055123	digestive system development	8/137	145/18888	0.0551724137931034	7.60654417316889	6.82603244966987	1.07875510864134e-05	6.52930723651335e-05	2.92847647221194e-05	TNF/INSR/EGFR/CXCL8/BCL2/HIF1A/CYP1A1/CDKN1A	8
BP	GO:0071402	cellular response to lipoprotein particle stimulus	5/137	41/18888	0.121951219512195	16.8132455047178	8.66405864830533	1.13349335935513e-05	6.83944295536815e-05	3.06757624542828e-05	AKT1/PPARG/TGFB1/ADAM17/SYK	5
BP	GO:1904994	regulation of leukocyte adhesion to vascular endothelial cell	5/137	41/18888	0.121951219512195	16.8132455047178	8.66405864830533	1.13349335935513e-05	6.83944295536815e-05	3.06757624542828e-05	TNF/IL6/SELP/SELE/RELA	5
BP	GO:0002548	monocyte chemotaxis	6/137	70/18888	0.0857142857142857	11.8173096976017	7.75016785022188	1.16857226948503e-05	7.00028932981488e-05	3.13971786874992e-05	IL6/CCL2/CCL5/CXCL10/CTSG/LGALS3	6
BP	GO:0030324	lung development	9/137	193/18888	0.0466321243523316	6.42910631216671	6.47998234523539	1.17172123734654e-05	7.00028932981488e-05	3.13971786874992e-05	HSD11B1/TNF/EGFR/MAPK1/VEGFA/ACE/NOS3/MME/CDC42	9
BP	GO:0051767	nitric-oxide synthase biosynthetic process	4/137	20/18888	0.2	27.5737226277372	10.1632829917612	1.17268273939354e-05	7.00028932981488e-05	3.13971786874992e-05	IFNG/CCL2/STAT1/GSTP1	4
BP	GO:0051769	regulation of nitric-oxide synthase biosynthetic process	4/137	20/18888	0.2	27.5737226277372	10.1632829917612	1.17268273939354e-05	7.00028932981488e-05	3.13971786874992e-05	IFNG/CCL2/STAT1/GSTP1	4
BP	GO:0055093	response to hyperoxia	4/137	20/18888	0.2	27.5737226277372	10.1632829917612	1.17268273939354e-05	7.00028932981488e-05	3.13971786874992e-05	MMP2/SOD2/CYP1A1/CDKN1A	4
BP	GO:1902004	positive regulation of amyloid-beta formation	4/137	20/18888	0.2	27.5737226277372	10.1632829917612	1.17268273939354e-05	7.00028932981488e-05	3.13971786874992e-05	TNF/IFNG/CASP3/RELA	4
BP	GO:1903376	regulation of oxidative stress-induced neuron intrinsic apoptotic signaling pathway	4/137	20/18888	0.2	27.5737226277372	10.1632829917612	1.17268273939354e-05	7.00028932981488e-05	3.13971786874992e-05	IL10/MMP2/HIF1A/PARP1	4
BP	GO:0090257	regulation of muscle system process	10/137	245/18888	0.0408163265306122	5.62729033219127	6.23134000640721	1.21850080503848e-05	7.26271059100679e-05	3.25741710717925e-05	CHRM3/CHRM2/PPARG/NOS3/PRKACA/PARP1/HSP90AA1/PRKCA/PTGS2/SCN5A	10
BP	GO:0002366	leukocyte activation involved in immune response	11/137	301/18888	0.0365448504983389	5.0383878555666	6.03693058724123	1.25258469506569e-05	7.44535382484897e-05	3.33933489627094e-05	TP53/IL10/TNF/CD40LG/IL6/IFNG/TGFB1/ICAM1/IL2/LGALS3/SYK	11
BP	GO:1903038	negative regulation of leukocyte cell-cell adhesion	8/137	148/18888	0.0540540540540541	7.45235746695601	6.73587533756443	1.2529521270462e-05	7.44535382484897e-05	3.33933489627094e-05	IL10/AKT1/IL2/CASP3/IRF1/CTSG/LGALS3/ERBB2	8
BP	GO:0045600	positive regulation of fat cell differentiation	6/137	71/18888	0.0845070422535211	11.6508687159453	7.68543706042234	1.26889050243758e-05	7.52862194921237e-05	3.37668169804491e-05	AKT1/PPARG/PIM1/MAPK14/PPARD/PTGS2	6
BP	GO:0042119	neutrophil activation	5/137	42/18888	0.119047619047619	16.4129301355579	8.54731714240604	1.27920689925369e-05	7.56686683219655e-05	3.39383500940623e-05	TNF/CXCL8/CCL5/CTSG/SYK	5
BP	GO:1904706	negative regulation of vascular associated smooth muscle cell proliferation	5/137	42/18888	0.119047619047619	16.4129301355579	8.54731714240604	1.27920689925369e-05	7.56686683219655e-05	3.39383500940623e-05	PTEN/IL10/PPARG/SOD2/CDKN1A	5
BP	GO:0008637	apoptotic mitochondrial changes	7/137	107/18888	0.0654205607476635	9.01944198103554	7.11059984492156	1.29144111882399e-05	7.62769603414168e-05	3.42111767206354e-05	TP53/AKT1/MMP9/BCL2/BAX/SOD2/BCL2L1	7
BP	GO:0030323	respiratory tube development	9/137	197/18888	0.0456852791878173	6.29856608247805	6.39005735549443	1.38072455527926e-05	8.14273455677511e-05	3.65211893164284e-05	HSD11B1/TNF/EGFR/MAPK1/VEGFA/ACE/NOS3/MME/CDC42	9
BP	GO:0002263	cell activation involved in immune response	11/137	305/18888	0.0360655737704918	4.97231063778868	5.97812189823804	1.4167094364049e-05	8.342370325818e-05	3.74165808663691e-05	TP53/IL10/TNF/CD40LG/IL6/IFNG/TGFB1/ICAM1/IL2/LGALS3/SYK	11
BP	GO:0045124	regulation of bone resorption	5/137	43/18888	0.116279069767442	16.0312340858937	8.43451960395845	1.43913067729647e-05	8.41889897242774e-05	3.77598214781656e-05	IL6/EGFR/SPP1/PRKCA/SYK	5
BP	GO:0007213	G protein-coupled acetylcholine receptor signaling pathway	4/137	21/18888	0.19047619047619	26.2606882168926	9.89994901610164	1.44047146101129e-05	8.41889897242774e-05	3.77598214781656e-05	CHRM1/CHRM3/CHRM2/PRKCB	4
BP	GO:0010829	negative regulation of glucose transmembrane transport	4/137	21/18888	0.19047619047619	26.2606882168926	9.89994901610164	1.44047146101129e-05	8.41889897242774e-05	3.77598214781656e-05	TNF/IL1B/ACE/PRKCB	4
BP	GO:0042359	vitamin D metabolic process	4/137	21/18888	0.19047619047619	26.2606882168926	9.89994901610164	1.44047146101129e-05	8.41889897242774e-05	3.77598214781656e-05	CYP3A4/TNF/IFNG/CYP1A1	4
BP	GO:0097709	connective tissue replacement	4/137	21/18888	0.19047619047619	26.2606882168926	9.89994901610164	1.44047146101129e-05	8.41889897242774e-05	3.77598214781656e-05	PPARG/TGFB1/IL1A/HIF1A	4
BP	GO:0032760	positive regulation of tumor necrosis factor production	7/137	109/18888	0.0642201834862385	8.85394763275966	7.02901671476315	1.45808863723395e-05	8.50914413669364e-05	3.81645823979852e-05	IL6/IFNG/TGFB1/IL1A/MIF/HSPB1/SYK	7
BP	GO:0016049	cell growth	14/137	496/18888	0.0282258064516129	3.89145279020485	5.57791666770462	1.52849799485576e-05	8.90674688507603e-05	3.9947880766016e-05	TP53/AKT1/EGFR/VEGFA/TGFB1/F2/IL2/BCL2/SPP1/ADAM17/S100A9/CDKN1A/ERBB2/CDC42	14
BP	GO:0007173	epidermal growth factor receptor signaling pathway	7/137	110/18888	0.0636363636363636	8.77345719973457	6.98900648979322	1.5478537901336e-05	8.97938919795607e-05	4.02736906819083e-05	AKT1/EGFR/TGFB1/MMP9/EGF/ADAM17/ERBB2	7
BP	GO:0042116	macrophage activation	7/137	110/18888	0.0636363636363636	8.77345719973457	6.98900648979322	1.5478537901336e-05	8.97938919795607e-05	4.02736906819083e-05	IL10/TNF/IL6/IFNG/MIF/PLA2G10/SYK	7
BP	GO:0051100	negative regulation of binding	7/137	110/18888	0.0636363636363636	8.77345719973457	6.98900648979322	1.5478537901336e-05	8.97938919795607e-05	4.02736906819083e-05	IL10/AKT1/BAX/JUN/MAPK8/CDKN1A/E2F1	7
BP	GO:0005996	monosaccharide metabolic process	10/137	252/18888	0.0396825396825397	5.47097671185262	6.10739324043999	1.55538511070448e-05	9.00971227089557e-05	4.0409693480447e-05	NR3C1/TP53/TNF/INSR/AKT1/PRKACA/GPI/TPI1/MAPK14/PPARD	10
BP	GO:0014015	positive regulation of gliogenesis	6/137	74/18888	0.0810810810810811	11.178536200434	7.49877240281576	1.61233655845004e-05	9.2410062924478e-05	4.14470762773403e-05	TNF/IL6/EGFR/IL1B/TGFB1/RELA	6
BP	GO:0072678	T cell migration	6/137	74/18888	0.0810810810810811	11.178536200434	7.49877240281576	1.61233655845004e-05	9.2410062924478e-05	4.14470762773403e-05	CCL2/ICAM1/CCL5/CXCL10/ADAM17/CXCL11	6
BP	GO:0045840	positive regulation of mitotic nuclear division	5/137	44/18888	0.113636363636364	15.6668878566689	8.32544236531229	1.61422181527925e-05	9.2410062924478e-05	4.14470762773403e-05	TNF/INSR/IL1B/IL1A/EGF	5
BP	GO:0060443	mammary gland morphogenesis	5/137	44/18888	0.113636363636364	15.6668878566689	8.32544236531229	1.61422181527925e-05	9.2410062924478e-05	4.14470762773403e-05	NR3C1/VDR/BAX/AR/ESR1	5
BP	GO:0071548	response to dexamethasone	5/137	44/18888	0.113636363636364	15.6668878566689	8.32544236531229	1.61422181527925e-05	9.2410062924478e-05	4.14470762773403e-05	NR3C1/CYP1B1/EGFR/ACE/CASP9	5
BP	GO:0090199	regulation of release of cytochrome c from mitochondria	5/137	44/18888	0.113636363636364	15.6668878566689	8.32544236531229	1.61422181527925e-05	9.2410062924478e-05	4.14470762773403e-05	TP53/AKT1/MMP9/BAX/BCL2L1	5
BP	GO:1904037	positive regulation of epithelial cell apoptotic process	5/137	44/18888	0.113636363636364	15.6668878566689	8.32544236531229	1.61422181527925e-05	9.2410062924478e-05	4.14470762773403e-05	CD40LG/IL6/TGFB1/CCL2/BAX	5
BP	GO:1990776	response to angiotensin	5/137	44/18888	0.113636363636364	15.6668878566689	8.32544236531229	1.61422181527925e-05	9.2410062924478e-05	4.14470762773403e-05	ACE/CA2/RELA/PRKCA/PTGS2	5
BP	GO:0034767	positive regulation of monoatomic ion transmembrane transport	8/137	154/18888	0.051948051948052	7.16200587733434	6.56291481881715	1.67310867649827e-05	9.56411538758511e-05	4.28962612349355e-05	ABCB1/IFNG/CCL2/F2/CXCL10/BAX/CXCL11/CTSS	8
BP	GO:0002444	myeloid leukocyte mediated immunity	7/137	112/18888	0.0625	8.61678832116788	6.91049116573599	1.74112474544908e-05	9.92990343178078e-05	4.45368666505499e-05	IL6/ACE/F2/ADAM17/CTSG/SYK/TREM1	7
BP	GO:0045123	cellular extravasation	6/137	75/18888	0.08	11.0294890510949	7.43892139006568	1.7421774307421e-05	9.92990343178078e-05	4.45368666505499e-05	TNF/CCL2/ICAM1/SELP/SELE/VCAM1	6
BP	GO:0036480	neuron intrinsic apoptotic signaling pathway in response to oxidative stress	4/137	22/18888	0.181818181818182	25.0670205706702	9.65435604819142	1.75068927850135e-05	9.96389385580824e-05	4.46893179802841e-05	IL10/MMP2/HIF1A/PARP1	4
BP	GO:0044282	small molecule catabolic process	12/137	373/18888	0.032171581769437	4.43545136103012	5.72803837331714	1.78814680646261e-05	0.000101622878099837	4.5579139834252e-05	CYP3A4/TP53/AKT1/NOS3/ALDH2/PON1/NOS2/XDH/CYP1A1/TPI1/PNP/PPARD	12
BP	GO:1903557	positive regulation of tumor necrosis factor superfamily cytokine production	7/137	113/18888	0.0619469026548673	8.54053355726374	6.87196411137778	1.84498783845434e-05	0.000104701051500094	4.69597393455799e-05	IL6/IFNG/TGFB1/IL1A/MIF/HSPB1/SYK	7
BP	GO:0048469	cell maturation	9/137	205/18888	0.0439024390243902	6.05276838169841	6.21745386153575	1.89541013070683e-05	0.000107406574073387	4.81732002709014e-05	PPARG/VEGFA/PRKACA/BCL2/HIF1A/AXL/PLA2G10/CDKN1A/REN	9
BP	GO:0042593	glucose homeostasis	10/137	258/18888	0.0387596899224806	5.34374469529791	6.00478239680651	1.90516561837012e-05	0.000107803148593736	4.83510689344904e-05	INSR/IL6/AKT1/PPARG/ACE/ICAM1/PRKACA/HIF1A/NCF1/GPI	10
BP	GO:0048754	branching morphogenesis of an epithelial tube	8/137	157/18888	0.0509554140127389	7.02515226184388	6.4798794666532	1.92406381664032e-05	0.000108715166518261	4.87601204521261e-05	TNF/VEGFA/EGF/BCL2/VDR/MYC/AR/ESR1	8
BP	GO:0001894	tissue homeostasis	10/137	259/18888	0.0386100386100386	5.32311247639715	5.98799187570616	1.9695888297688e-05	0.000110509860739021	4.95650633978219e-05	IL6/EGFR/VEGFA/NOS3/BCL2/SPP1/BAX/PRKCA/PTGS2/SYK	10
BP	GO:0033500	carbohydrate homeostasis	10/137	259/18888	0.0386100386100386	5.32311247639715	5.98799187570616	1.9695888297688e-05	0.000110509860739021	4.95650633978219e-05	INSR/IL6/AKT1/PPARG/ACE/ICAM1/PRKACA/HIF1A/NCF1/GPI	10
BP	GO:0060249	anatomical structure homeostasis	10/137	259/18888	0.0386100386100386	5.32311247639715	5.98799187570616	1.9695888297688e-05	0.000110509860739021	4.95650633978219e-05	IL6/EGFR/VEGFA/NOS3/BCL2/SPP1/BAX/PRKCA/PTGS2/SYK	10
BP	GO:0001763	morphogenesis of a branching structure	9/137	206/18888	0.0436893203883495	6.02338601091347	6.19652255689169	1.9699583870869e-05	0.000110509860739021	4.95650633978219e-05	IL10/TNF/VEGFA/EGF/BCL2/VDR/MYC/AR/ESR1	9
BP	GO:0016051	carbohydrate biosynthetic process	9/137	206/18888	0.0436893203883495	6.02338601091347	6.19652255689169	1.9699583870869e-05	0.000110509860739021	4.95650633978219e-05	NR3C1/INSR/AKT1/TGFB1/PRKACA/EGF/PARP1/GPI/TPI1	9
BP	GO:0043029	T cell homeostasis	5/137	46/18888	0.108695652173913	14.9857188194224	8.11763959135923	2.0139122084084e-05	0.000112652313803674	5.05259805618311e-05	AKT1/IL2/CASP3/BCL2/BAX	5
BP	GO:0070849	response to epidermal growth factor	5/137	46/18888	0.108695652173913	14.9857188194224	8.11763959135923	2.0139122084084e-05	0.000112652313803674	5.05259805618311e-05	AKT1/EGFR/MAPK1/FOS/ERBB2	5
BP	GO:0061045	negative regulation of wound healing	6/137	77/18888	0.0779220779220779	10.7430088160015	7.32254540378108	2.02716935672185e-05	0.000113231888354035	5.07859270420843e-05	PTEN/TNF/THBD/F2/NOS3/PLAT	6
BP	GO:2000278	regulation of DNA biosynthetic process	7/137	115/18888	0.0608695652173913	8.39200253887655	6.79631882903492	2.0680986202896e-05	0.000115353289662373	5.17374022284326e-05	CYP1B1/TP53/TNF/MAPK1/MYC/HSP90AA1/CDKN1A	7
BP	GO:0038128	ERBB2 signaling pathway	4/137	23/18888	0.173913043478261	23.9771501110758	9.42456321051597	2.10735660053124e-05	0.000117097227181092	5.25195801544486e-05	EGFR/MAPK1/EGF/ERBB2	4
BP	GO:2000193	positive regulation of fatty acid transport	4/137	23/18888	0.173913043478261	23.9771501110758	9.42456321051597	2.10735660053124e-05	0.000117097227181092	5.25195801544486e-05	IL1B/IL1A/MIF/PLA2G10	4
BP	GO:0008643	carbohydrate transport	8/137	159/18888	0.050314465408805	6.93678556672635	6.42572576457895	2.10834905205854e-05	0.000117097227181092	5.25195801544486e-05	TNF/INSR/AKT1/IL1B/ACE/MAPK14/PPARD/PRKCB	8
BP	GO:0009746	response to hexose	9/137	208/18888	0.0432692307692308	5.96546883773161	6.15507074606975	2.12656381872413e-05	0.000117941340868246	5.28981757669936e-05	TNF/ACE/ICAM1/PRKACA/CASP3/HIF1A/NCF1/PRKCB/PTGS2	9
BP	GO:0050853	B cell receptor signaling pathway	6/137	78/18888	0.0769230769230769	10.6052779337451	7.26594985509475	2.18311870754924e-05	0.00012090643267022	5.42280567582679e-05	MAPK1/BCL2/BAX/NFKBIA/PRKCB/SYK	6
BP	GO:0003044	regulation of systemic arterial blood pressure mediated by a chemical signal	5/137	47/18888	0.106382978723404	14.6668737381581	8.0185472599786	2.24060353334827e-05	0.000123739545415138	5.54987434813889e-05	ACE/NOS3/SOD2/CTSG/REN	5
BP	GO:0006509	membrane protein ectodomain proteolysis	5/137	47/18888	0.106382978723404	14.6668737381581	8.0185472599786	2.24060353334827e-05	0.000123739545415138	5.54987434813889e-05	IL10/TNF/IL1B/IFNG/ADAM17	5
BP	GO:0051928	positive regulation of calcium ion transport	7/137	117/18888	0.0598290598290598	8.24854950402396	6.7224857782411	2.31301875426033e-05	0.000127558580100958	5.72116286036331e-05	CCL2/F2/CCL5/CXCL10/BAX/LGALS3/CXCL11	7
BP	GO:0120254	olefinic compound metabolic process	8/137	162/18888	0.0493827160493827	6.80832657474993	6.34622669071762	2.41242637864817e-05	0.000132853340007244	5.95863950604574e-05	CYP3A4/CYP1B1/CYP2C9/CYP1A1/PTGS1/PLA2G10/GSTP1/PTGS2	8
BP	GO:0002460	adaptive immune response based on somatic recombination of immune receptors built from immunoglobulin superfamily domains	12/137	385/18888	0.0311688311688312	4.29720352640061	5.58707630610899	2.44259369839422e-05	0.000134325476240807	6.02466666892408e-05	IL10/TNF/CD40LG/IL6/IL1B/TGFB1/ICAM1/IL2/C1S/ADAM17/C1R/HPRT1	12
BP	GO:0002285	lymphocyte activation involved in immune response	9/137	212/18888	0.0424528301886792	5.85291282192535	6.07376583533351	2.47173385355306e-05	0.000135737069766748	6.08797841516764e-05	TP53/IL10/CD40LG/IL6/IFNG/TGFB1/ICAM1/IL2/LGALS3	9
BP	GO:0002673	regulation of acute inflammatory response	5/137	48/18888	0.104166666666667	14.3613138686131	7.92243878818995	2.4866464851001e-05	0.000136364484666779	6.11611876308667e-05	TNF/IL6/IL1B/GSTP1/PTGS2	5
BP	GO:0015711	organic anion transport	13/137	451/18888	0.0288248337028825	3.97403984656967	5.46411061877004	2.51410830914611e-05	0.000137129878699973	6.15044764878597e-05	ABCB1/TNF/AKT1/IL1B/PPARG/ACE/IL1A/NOS2/MIF/PLA2G10/PPARD/PTGS2/SYK	13
BP	GO:0044772	mitotic cell cycle phase transition	13/137	451/18888	0.0288248337028825	3.97403984656967	5.46411061877004	2.51410830914611e-05	0.000137129878699973	6.15044764878597e-05	ABCB1/TP53/PTEN/AKT1/EGFR/CCL2/BCL2/MYC/ADAM17/CYP1A1/CDK1/CDKN1A/E2F1	13
BP	GO:0009651	response to salt stress	4/137	24/18888	0.166666666666667	22.978102189781	9.20891516530452	2.51463230250334e-05	0.000137129878699973	6.15044764878597e-05	TP53/TNF/BAX/HSP90AA1	4
BP	GO:0060252	positive regulation of glial cell proliferation	4/137	24/18888	0.166666666666667	22.978102189781	9.20891516530452	2.51463230250334e-05	0.000137129878699973	6.15044764878597e-05	TNF/IL6/EGFR/IL1B	4
BP	GO:0034250	positive regulation of amide metabolic process	8/137	163/18888	0.049079754601227	6.76655770005822	6.32017476857038	2.52161636849516e-05	0.000137258373260981	6.15621079156804e-05	CYP1B1/TNF/IL6/IFNG/CCL5/CASP3/RELA/ERBB2	8
BP	GO:1903036	positive regulation of response to wounding	6/137	80/18888	0.075	10.3401459854015	7.15577878952516	2.52400947249733e-05	0.000137258373260981	6.15621079156804e-05	THBD/F2/F3/PLAT/CLDN4/DUOX2	6
BP	GO:0045216	cell-cell junction organization	9/137	213/18888	0.0422535211267606	5.82543435797265	6.0537637077817	2.56510147955902e-05	0.00013929926090383	6.24774717097271e-05	TNF/IL1B/VEGFA/TGFB1/ACE/PRKACA/CLDN4/PRKCA/CDC42	9
BP	GO:2000241	regulation of reproductive process	9/137	214/18888	0.0420560747663551	5.79821270209428	6.03388824653897	2.66144779714299e-05	0.000144330941564897	6.47342438140042e-05	INSR/VEGFA/IL1A/PLAT/BAX/BCL2L1/PLA2G10/AR/ESR1	9
BP	GO:0051250	negative regulation of lymphocyte activation	8/137	165/18888	0.0484848484848485	6.68453881884539	6.26872	2.75245981751336e-05	0.000148277130907186	6.65041594000195e-05	IL10/IL2/CASP3/IRF1/CTSG/LGALS3/AXL/ERBB2	8
BP	GO:0014037	Schwann cell differentiation	5/137	49/18888	0.102040816326531	14.0682258304782	7.82916245284711	2.75317639484955e-05	0.000148277130907186	6.65041594000195e-05	AKT1/MAPK1/RELA/CDK1/ERBB2	5
BP	GO:0035272	exocrine system development	5/137	49/18888	0.102040816326531	14.0682258304782	7.82916245284711	2.75317639484955e-05	0.000148277130907186	6.65041594000195e-05	TNF/INSR/EGFR/TGFB1/CDC42	5
BP	GO:0036230	granulocyte activation	5/137	49/18888	0.102040816326531	14.0682258304782	7.82916245284711	2.75317639484955e-05	0.000148277130907186	6.65041594000195e-05	TNF/CXCL8/CCL5/CTSG/SYK	5
BP	GO:0098926	postsynaptic signal transduction	5/137	49/18888	0.102040816326531	14.0682258304782	7.82916245284711	2.75317639484955e-05	0.000148277130907186	6.65041594000195e-05	CHRM1/CHRM3/CHRM2/RELA/PRKCB	5
BP	GO:0070374	positive regulation of ERK1 and ERK2 cascade	9/137	215/18888	0.0418604651162791	5.77124427092174	6.01413800677614	2.76084967163157e-05	0.000148485862669594	6.65977782225179e-05	TNF/EGFR/TGFB1/CCL2/ICAM1/IL1A/CCL5/MIF/PRKCA	9
BP	GO:0071695	anatomical structure maturation	10/137	271/18888	0.03690036900369	5.08740269884451	5.79304337480118	2.90139650068496e-05	0.000155830498869206	6.98919399962572e-05	MMP2/PPARG/VEGFA/PRKACA/BCL2/HIF1A/AXL/PLA2G10/CDKN1A/REN	10
BP	GO:0042178	xenobiotic catabolic process	4/137	25/18888	0.16	22.0589781021898	9.00599023619226	2.97680855196652e-05	0.000159224643477279	7.1414256571045e-05	CYP3A4/CYP2C9/GSTM1/CYP1A1	4
BP	GO:0045662	negative regulation of myoblast differentiation	4/137	25/18888	0.16	22.0589781021898	9.00599023619226	2.97680855196652e-05	0.000159224643477279	7.1414256571045e-05	TNF/TGFB1/CXCL10/PPARD	4
BP	GO:1902993	positive regulation of amyloid precursor protein catabolic process	4/137	25/18888	0.16	22.0589781021898	9.00599023619226	2.97680855196652e-05	0.000159224643477279	7.1414256571045e-05	TNF/IFNG/CASP3/RELA	4
BP	GO:0003012	muscle system process	13/137	459/18888	0.028322440087146	3.90477553551834	5.38514737119737	3.01734471769202e-05	0.000161172374947757	7.22878386493372e-05	CHRM3/CHRM2/TNF/IL1B/PPARG/NOS3/PRKACA/CHUK/PARP1/HSP90AA1/PRKCA/PTGS2/SCN5A	13
BP	GO:0051403	stress-activated MAPK cascade	5/137	50/18888	0.1	13.7868613138686	7.73857716607568	3.0413643454514e-05	0.000162233759764188	7.27638830978966e-05	MAPK1/MYC/MAPK8/GSTP1/MAPK14	5
BP	GO:1901136	carbohydrate derivative catabolic process	10/137	273/18888	0.0366300366300366	5.05013234940242	5.76167258557237	3.08864347678601e-05	0.000164531280575385	7.37943500978845e-05	INSR/IFNG/TGFB1/PRKACA/HIF1A/XDH/GPI/TPI1/PNP/HPRT1	10
BP	GO:0051051	negative regulation of transport	13/137	462/18888	0.0281385281385281	3.87941985022277	5.35599305833752	3.22762247979154e-05	0.000171700733278706	7.70099398687104e-05	PTEN/TNF/AKT1/IL1B/ACE/NOS3/MMP9/EGF/BCL2/LGALS3/PLA2G10/PRKCB/PTGS2	13
BP	GO:0048639	positive regulation of developmental growth	8/137	169/18888	0.0473372781065089	6.52632488230467	6.1683356764192	3.26753115426658e-05	0.000173587592570412	7.78562200086975e-05	INSR/AKT1/VEGFA/BCL2/PIM1/CDK1/MAPK14/PPARD	8
BP	GO:0046034	ATP metabolic process	9/137	220/18888	0.0409090909090909	5.6400796284008	5.91721616046744	3.30648731428558e-05	0.000175181102965537	7.85709294765337e-05	INSR/IFNG/TGFB1/PRKACA/HIF1A/PARP1/HSPA8/GPI/TPI1	9
BP	GO:0060541	respiratory system development	9/137	220/18888	0.0409090909090909	5.6400796284008	5.91721616046744	3.30648731428558e-05	0.000175181102965537	7.85709294765337e-05	HSD11B1/TNF/EGFR/MAPK1/VEGFA/ACE/NOS3/MME/CDC42	9
BP	GO:0001974	blood vessel remodeling	5/137	51/18888	0.0980392156862745	13.5165306998712	7.65055153410725	3.3524171552183e-05	0.000176895426139049	7.93398249960039e-05	TGFB1/ACE/NOS3/BAX/AXL	5
BP	GO:0006636	unsaturated fatty acid biosynthetic process	5/137	51/18888	0.0980392156862745	13.5165306998712	7.65055153410725	3.3524171552183e-05	0.000176895426139049	7.93398249960039e-05	IL1B/MIF/PTGS1/PLA2G10/PTGS2	5
BP	GO:0046850	regulation of bone remodeling	5/137	51/18888	0.0980392156862745	13.5165306998712	7.65055153410725	3.3524171552183e-05	0.000176895426139049	7.93398249960039e-05	IL6/EGFR/SPP1/PRKCA/SYK	5
BP	GO:0043200	response to amino acid	7/137	124/18888	0.0564516129032258	7.7829055804097	6.47729174890141	3.36621603879864e-05	0.000177384160535076	7.95590285237414e-05	TNF/EGFR/MMP2/CASP3/CHUK/RELA/BCL2L1	7
BP	GO:0072524	pyridine-containing compound metabolic process	8/137	170/18888	0.0470588235294118	6.48793473593817	6.14374573976329	3.40818772696979e-05	0.000179354158983201	8.04425976217563e-05	TP53/INSR/IFNG/PRKACA/HIF1A/GPI/TPI1/PNP	8
BP	GO:0060485	mesenchyme development	11/137	336/18888	0.0327380952380952	4.51355578727842	5.55457303151401	3.45551281481123e-05	0.00018160020303645	8.14499766479274e-05	PTEN/IL6/IL1B/MAPK1/TGFB1/STAT1/NOS3/BCL2/MYC/HIF1A/CDC42	11
BP	GO:0044346	fibroblast apoptotic process	4/137	26/18888	0.153846153846154	21.2105558674902	8.81455960769396	3.49830573213919e-05	0.000183110781963376	8.21274903085167e-05	TP53/CASP3/MYC/CASP9	4
BP	GO:1901623	regulation of lymphocyte chemotaxis	4/137	26/18888	0.153846153846154	21.2105558674902	8.81455960769396	3.49830573213919e-05	0.000183110781963376	8.21274903085167e-05	CCL2/CCL5/CXCL10/ADAM17	4
BP	GO:2000108	positive regulation of leukocyte apoptotic process	4/137	26/18888	0.153846153846154	21.2105558674902	8.81455960769396	3.49830573213919e-05	0.000183110781963376	8.21274903085167e-05	TP53/IL10/CCL5/BAX	4
BP	GO:0046632	alpha-beta T cell differentiation	7/137	125/18888	0.056	7.72064233576642	6.44383197390104	3.54456574332721e-05	0.000185036743076227	8.29913081074153e-05	IL6/IFNG/IL2/BCL2/IRF1/PNP/SYK	7
BP	GO:0072676	lymphocyte migration	7/137	125/18888	0.056	7.72064233576642	6.44383197390104	3.54456574332721e-05	0.000185036743076227	8.29913081074153e-05	AKT1/CCL2/ICAM1/CCL5/CXCL10/ADAM17/CXCL11	7
BP	GO:0006469	negative regulation of protein kinase activity	8/137	171/18888	0.0467836257309941	6.44999359713151	6.11935268071587	3.55387376491514e-05	0.00018527528561091	8.3098297436472e-05	PTEN/AKT1/IL1B/IFNG/PPARG/HSPB1/CDKN1A/GSTP1	8
BP	GO:1904707	positive regulation of vascular associated smooth muscle cell proliferation	5/137	52/18888	0.0961538461538462	13.2565974171814	7.56496301601958	3.68757734034649e-05	0.000191989712393539	8.61098023549969e-05	IL10/TNF/MMP2/MMP9/JUN	5
BP	GO:0009267	cellular response to starvation	8/137	172/18888	0.0465116279069767	6.41249363435749	6.09515368623652	3.70473116484606e-05	0.000192626314555161	8.63953264366398e-05	TP53/MAPK1/BCL2/HSPA5/FOS/MAPK8/HSPA8/CDKN1A	8
BP	GO:0008286	insulin receptor signaling pathway	7/137	126/18888	0.0555555555555556	7.65936739659367	6.41074111480993	3.73060986447218e-05	0.000193714270519073	8.6883288379264e-05	INSR/AKT1/IL1B/MAPK1/RELA/CTSD/PRKCB	7
BP	GO:0021700	developmental maturation	11/137	341/18888	0.032258064516129	4.44737461737697	5.49108782588531	3.95206978644118e-05	0.000204941549933488	9.19188645010611e-05	PTEN/MMP2/PPARG/VEGFA/PRKACA/BCL2/HIF1A/AXL/PLA2G10/CDKN1A/REN	11
BP	GO:0002639	positive regulation of immunoglobulin production	5/137	53/18888	0.0943396226415094	13.0064729376119	7.48169717008178	4.04812305659148e-05	0.00020936721099567	9.39038291879895e-05	IL10/IL6/TGFB1/IL2/GPI	5
BP	GO:0048260	positive regulation of receptor-mediated endocytosis	5/137	53/18888	0.0943396226415094	13.0064729376119	7.48169717008178	4.04812305659148e-05	0.00020936721099567	9.39038291879895e-05	INSR/VEGFA/EGF/SELE/SYK	5
BP	GO:0033077	T cell differentiation in thymus	6/137	87/18888	0.0689655172413793	9.50818021646111	6.7988488908988	4.06919031329916e-05	0.000209817868290639	9.41059546566709e-05	TP53/IL1B/IL1A/BCL2/ADAM17/ERBB2	6
BP	GO:0010818	T cell chemotaxis	4/137	27/18888	0.148148148148148	20.4249797242498	8.6335549107011	4.08366746212726e-05	0.000209817868290639	9.41059546566709e-05	CCL5/CXCL10/ADAM17/CXCL11	4
BP	GO:0036296	response to increased oxygen levels	4/137	27/18888	0.148148148148148	20.4249797242498	8.6335549107011	4.08366746212726e-05	0.000209817868290639	9.41059546566709e-05	MMP2/SOD2/CYP1A1/CDKN1A	4
BP	GO:0042026	protein refolding	4/137	27/18888	0.148148148148148	20.4249797242498	8.6335549107011	4.08366746212726e-05	0.000209817868290639	9.41059546566709e-05	HSPA5/HSP90AA1/HSPB1/HSPA8	4
BP	GO:0051043	regulation of membrane protein ectodomain proteolysis	4/137	27/18888	0.148148148148148	20.4249797242498	8.6335549107011	4.08366746212726e-05	0.000209817868290639	9.41059546566709e-05	IL10/TNF/IL1B/IFNG	4
BP	GO:0002761	regulation of myeloid leukocyte differentiation	7/137	128/18888	0.0546875	7.5396897810219	6.34563769102816	4.12680404228271e-05	0.000211755955450465	9.49752111402541e-05	TNF/IFNG/TGFB1/CASP8/MYC/FOS/PRKCA	7
BP	GO:0002002	regulation of angiotensin levels in blood	3/137	10/18888	0.3	41.3605839416058	10.9121168274061	4.31598060351209e-05	0.000219447128214984	9.84247989247983e-05	ACE/CTSG/REN	3
BP	GO:0009128	purine nucleoside monophosphate catabolic process	3/137	10/18888	0.3	41.3605839416058	10.9121168274061	4.31598060351209e-05	0.000219447128214984	9.84247989247983e-05	XDH/PNP/HPRT1	3
BP	GO:0009169	purine ribonucleoside monophosphate catabolic process	3/137	10/18888	0.3	41.3605839416058	10.9121168274061	4.31598060351209e-05	0.000219447128214984	9.84247989247983e-05	XDH/PNP/HPRT1	3
BP	GO:0032025	response to cobalt ion	3/137	10/18888	0.3	41.3605839416058	10.9121168274061	4.31598060351209e-05	0.000219447128214984	9.84247989247983e-05	CASP8/CASP3/CASP9	3
BP	GO:0042368	vitamin D biosynthetic process	3/137	10/18888	0.3	41.3605839416058	10.9121168274061	4.31598060351209e-05	0.000219447128214984	9.84247989247983e-05	CYP3A4/TNF/IFNG	3
BP	GO:0060068	vagina development	3/137	10/18888	0.3	41.3605839416058	10.9121168274061	4.31598060351209e-05	0.000219447128214984	9.84247989247983e-05	BAX/AXL/ESR1	3
BP	GO:0097267	omega-hydroxylase P450 pathway	3/137	10/18888	0.3	41.3605839416058	10.9121168274061	4.31598060351209e-05	0.000219447128214984	9.84247989247983e-05	CYP1B1/CYP2C9/CYP1A1	3
BP	GO:0050868	negative regulation of T cell activation	7/137	129/18888	0.0542635658914729	7.48124257341708	6.31361138003793	4.33747966535277e-05	0.000219868931001788	9.86139827834105e-05	IL10/IL2/CASP3/IRF1/CTSG/LGALS3/ERBB2	7
BP	GO:0001892	embryonic placenta development	6/137	88/18888	0.0681818181818182	9.40013271400133	6.75115557107907	4.34114615686394e-05	0.000219868931001788	9.86139827834105e-05	IL10/AKT1/EGFR/MAPK1/CASP8/HIF1A	6
BP	GO:0046889	positive regulation of lipid biosynthetic process	6/137	88/18888	0.0681818181818182	9.40013271400133	6.75115557107907	4.34114615686394e-05	0.000219868931001788	9.86139827834105e-05	TNF/AKT1/IL1B/IFNG/IL1A/PTGS2	6
BP	GO:0010874	regulation of cholesterol efflux	5/137	54/18888	0.0925925925925926	12.7656123276561	7.40064697711907	4.43536802079653e-05	0.0002243504393443	0.000100623995678451	PPARG/EGF/PON1/NFKBIA/PLA2G10	5
BP	GO:0022898	regulation of transmembrane transporter activity	9/137	229/18888	0.0393013100436681	5.41841711025404	5.75002625440879	4.51998572858714e-05	0.000228335196366611	0.000102411209354361	CHRM3/ABCB1/IFNG/CCL2/PRKACA/MMP9/BCL2/CTSS/PIM1	9
BP	GO:0072331	signal transduction by p53 class mediator	8/137	177/18888	0.0451977401129944	6.23134974638129	5.97697510248351	4.54175657871457e-05	0.000229138944809987	0.000102771700647042	TP53/AKT1/BCL2/MYC/BAX/MIF/CDKN1A/E2F1	8
BP	GO:0043393	regulation of protein binding	7/137	130/18888	0.0538461538461538	7.42369455362156	6.28192647907634	4.55690094584827e-05	0.000229606735802406	0.000102981510794672	IL10/AKT1/PRKACA/MMP9/BAX/MAPK8/CDKN1A	7
BP	GO:0042310	vasoconstriction	6/137	89/18888	0.0674157303370786	9.29451324530468	6.70421743612366	4.62747571379098e-05	0.000232862677489353	0.000104441841619939	CHRM3/CRP/EGFR/MMP2/ACE/PTGS2	6
BP	GO:0002675	positive regulation of acute inflammatory response	4/137	28/18888	0.142857142857143	19.6955161626694	8.46204222984429	4.73755571243842e-05	0.000236877785621921	0.000106242668150793	TNF/IL6/IL1B/PTGS2	4
BP	GO:0010165	response to X-ray	4/137	28/18888	0.142857142857143	19.6955161626694	8.46204222984429	4.73755571243842e-05	0.000236877785621921	0.000106242668150793	TP53/THBD/CASP3/CDKN1A	4
BP	GO:0030194	positive regulation of blood coagulation	4/137	28/18888	0.142857142857143	19.6955161626694	8.46204222984429	4.73755571243842e-05	0.000236877785621921	0.000106242668150793	THBD/F2/F3/PLAT	4
BP	GO:0090330	regulation of platelet aggregation	4/137	28/18888	0.142857142857143	19.6955161626694	8.46204222984429	4.73755571243842e-05	0.000236877785621921	0.000106242668150793	IL6/CTSG/PRKCA/SYK	4
BP	GO:1900048	positive regulation of hemostasis	4/137	28/18888	0.142857142857143	19.6955161626694	8.46204222984429	4.73755571243842e-05	0.000236877785621921	0.000106242668150793	THBD/F2/F3/PLAT	4
BP	GO:0045861	negative regulation of proteolysis	9/137	231/18888	0.038961038961039	5.37150440800076	5.71407006927716	4.83549897876537e-05	0.000241466168671425	0.000108300615697024	TP53/IL10/TNF/AKT1/VEGFA/F2/MMP9/PLAT/SERPINA1	9
BP	GO:0042743	hydrogen peroxide metabolic process	5/137	55/18888	0.0909090909090909	12.5335102853351	7.32171223176107	4.85066141286446e-05	0.000241914363830357	0.000108501636866705	EGFR/MPO/SOD2/CYP1A1/DUOX2	5
BP	GO:0006096	glycolytic process	6/137	90/18888	0.0666666666666667	9.19124087591241	6.65801372560132	4.92873465551252e-05	0.000245494936344637	0.000110107568703773	INSR/IFNG/PRKACA/HIF1A/GPI/TPI1	6
BP	GO:0035265	organ growth	8/137	180/18888	0.0444444444444444	6.12749391727494	5.90822849117483	5.11574336293632e-05	0.000254485452278384	0.000114139928253005	PTEN/AKT1/BCL2/PIM1/AR/CDK1/ESR1/MAPK14	8
BP	GO:0048565	digestive tract development	7/137	133/18888	0.0526315789473684	7.25624279677295	6.18885685577033	5.27044066829787e-05	0.00026184781465114	0.000117442040438497	TNF/EGFR/CXCL8/BCL2/HIF1A/CYP1A1/CDKN1A	7
BP	GO:0030100	regulation of endocytosis	10/137	291/18888	0.0343642611683849	4.73775302882083	5.49243856494846	5.29403133054104e-05	0.000262353136912744	0.000117668683832718	INSR/IFNG/VEGFA/CCL2/EGF/SELE/LGALS3/AXL/SYK/CDC42	10
BP	GO:0031348	negative regulation of defense response	10/137	291/18888	0.0343642611683849	4.73775302882083	5.49243856494846	5.29403133054104e-05	0.000262353136912744	0.000117668683832718	IL10/PPARG/TGFB1/IL2/PARP1/PLA2G10/GSTP1/MAPK14/PPARD/SYK	10
BP	GO:0007263	nitric oxide mediated signal transduction	4/137	29/18888	0.137931034482759	19.0163604329222	8.29920108100593	5.46474601441116e-05	0.000270470340713261	0.000121309351898854	EGFR/VEGFA/NOS3/NOS2	4
BP	GO:0033673	negative regulation of kinase activity	8/137	182/18888	0.043956043956044	6.06015881928291	5.86325704062762	5.5310280422412e-05	0.000273404799559584	0.000122625493623978	PTEN/AKT1/IL1B/IFNG/PPARG/HSPB1/CDKN1A/GSTP1	8
BP	GO:0046032	ADP catabolic process	6/137	92/18888	0.0652173913043478	8.99143129165344	6.56773047767616	5.57832915833369e-05	0.000275394785468241	0.0001235180273496	INSR/IFNG/PRKACA/HIF1A/GPI/TPI1	6
BP	GO:0001659	temperature homeostasis	8/137	183/18888	0.0437158469945355	6.02704319731961	5.84102227652684	5.74897386917626e-05	0.000283461384974517	0.000127135998752873	TNF/IL1B/VEGFA/IL1A/LCN2/ADAM17/PTGS2/SYK	8
BP	GO:0061900	glial cell activation	5/137	57/18888	0.087719298245614	12.0937379946216	7.16981909185514	5.77096679506527e-05	0.000284187407666312	0.000127461629067728	TNF/IL6/EGFR/IL1B/IFNG	5
BP	GO:1901990	regulation of mitotic cell cycle phase transition	11/137	356/18888	0.0308988764044944	4.25998523743131	5.30773269992696	5.82824350117293e-05	0.000286646944523096	0.000128564762303265	TP53/PTEN/AKT1/EGFR/CCL2/BCL2/ADAM17/CYP1A1/CDK1/CDKN1A/E2F1	11
BP	GO:0031650	regulation of heat generation	3/137	11/18888	0.272727272727273	37.6005308560053	10.3787917028604	5.90296176895714e-05	0.000288147072617009	0.000129237588633716	TNF/IL1B/PTGS2	3
BP	GO:0042447	hormone catabolic process	3/137	11/18888	0.272727272727273	37.6005308560053	10.3787917028604	5.90296176895714e-05	0.000288147072617009	0.000129237588633716	ACE/SPP1/MME	3
BP	GO:0070944	neutrophil-mediated killing of bacterium	3/137	11/18888	0.272727272727273	37.6005308560053	10.3787917028604	5.90296176895714e-05	0.000288147072617009	0.000129237588633716	F2/CTSG/TREM1	3
BP	GO:0071492	cellular response to UV-A	3/137	11/18888	0.272727272727273	37.6005308560053	10.3787917028604	5.90296176895714e-05	0.000288147072617009	0.000129237588633716	MMP2/MMP9/MME	3
BP	GO:1902510	regulation of apoptotic DNA fragmentation	3/137	11/18888	0.272727272727273	37.6005308560053	10.3787917028604	5.90296176895714e-05	0.000288147072617009	0.000129237588633716	IL6/BAX/APAF1	3
BP	GO:2000343	positive regulation of chemokine (C-X-C motif) ligand 2 production	3/137	11/18888	0.272727272727273	37.6005308560053	10.3787917028604	5.90296176895714e-05	0.000288147072617009	0.000129237588633716	TNF/TGFB1/MIF	3
BP	GO:0070098	chemokine-mediated signaling pathway	6/137	93/18888	0.0645161290322581	8.89474923475394	6.52361324649685	5.92784205537986e-05	0.000289000778510415	0.00012962048647149	CXCL8/CCL2/CCL5/CXCL10/HIF1A/CXCL11	6
BP	GO:0050482	arachidonic acid secretion	4/137	30/18888	0.133333333333333	18.3824817518248	8.14430727326606	6.27012276219434e-05	0.000303794052046839	0.000136255455837941	ACE/MIF/PLA2G10/SYK	4
BP	GO:0050820	positive regulation of coagulation	4/137	30/18888	0.133333333333333	18.3824817518248	8.14430727326606	6.27012276219434e-05	0.000303794052046839	0.000136255455837941	THBD/F2/F3/PLAT	4
BP	GO:0060603	mammary gland duct morphogenesis	4/137	30/18888	0.133333333333333	18.3824817518248	8.14430727326606	6.27012276219434e-05	0.000303794052046839	0.000136255455837941	NR3C1/VDR/AR/ESR1	4
BP	GO:0097421	liver regeneration	4/137	30/18888	0.133333333333333	18.3824817518248	8.14430727326606	6.27012276219434e-05	0.000303794052046839	0.000136255455837941	IL10/TNF/IL6/EGFR	4
BP	GO:1903963	arachidonate transport	4/137	30/18888	0.133333333333333	18.3824817518248	8.14430727326606	6.27012276219434e-05	0.000303794052046839	0.000136255455837941	ACE/MIF/PLA2G10/SYK	4
BP	GO:0019364	pyridine nucleotide catabolic process	6/137	94/18888	0.0638297872340425	8.80012424289486	6.48015498110632	6.29463914241566e-05	0.000304604443649075	0.000136618926670981	INSR/IFNG/PRKACA/HIF1A/GPI/TPI1	6
BP	GO:0009137	purine nucleoside diphosphate catabolic process	6/137	95/18888	0.0631578947368421	8.70749135612754	6.43733853457904	6.67934248386149e-05	0.00032162843733865	0.000144254402101546	INSR/IFNG/PRKACA/HIF1A/GPI/TPI1	6
BP	GO:0009181	purine ribonucleoside diphosphate catabolic process	6/137	95/18888	0.0631578947368421	8.70749135612754	6.43733853457904	6.67934248386149e-05	0.00032162843733865	0.000144254402101546	INSR/IFNG/PRKACA/HIF1A/GPI/TPI1	6
BP	GO:0046330	positive regulation of JNK cascade	6/137	95/18888	0.0631578947368421	8.70749135612754	6.43733853457904	6.67934248386149e-05	0.00032162843733865	0.000144254402101546	TNF/IL1B/IL1A/NCF1/BIRC7/CDC42	6
BP	GO:0071901	negative regulation of protein serine/threonine kinase activity	6/137	95/18888	0.0631578947368421	8.70749135612754	6.43733853457904	6.67934248386149e-05	0.00032162843733865	0.000144254402101546	PTEN/AKT1/IL1B/PPARG/CDKN1A/GSTP1	6
BP	GO:0042176	regulation of protein catabolic process	11/137	362/18888	0.0303867403314917	4.18937774730814	5.23719774261637	6.76920881317627e-05	0.000325554815000236	0.000146015431899419	IL10/TNF/AKT1/EGFR/IL1B/IFNG/PRKACA/NOS2/HSP90AA1/RELA/ODC1	11
BP	GO:0031098	stress-activated protein kinase signaling cascade	5/137	59/18888	0.0847457627118644	11.6837807744649	7.02533281078612	6.82053700172591e-05	0.000326817397999367	0.000146581716265162	MAPK1/MYC/MAPK8/GSTP1/MAPK14	5
BP	GO:0038066	p38MAPK cascade	5/137	59/18888	0.0847457627118644	11.6837807744649	7.02533281078612	6.82053700172591e-05	0.000326817397999367	0.000146581716265162	IL1B/VEGFA/NCF1/XDH/MAPK14	5
BP	GO:1903409	reactive oxygen species biosynthetic process	5/137	59/18888	0.0847457627118644	11.6837807744649	7.02533281078612	6.82053700172591e-05	0.000326817397999367	0.000146581716265162	MPO/NCF1/SOD2/CYP1A1/DUOX2	5
BP	GO:0043401	steroid hormone mediated signaling pathway	7/137	139/18888	0.0503597122302158	6.94302368324319	6.0111195223246	6.97295674960975e-05	0.000333711883610454	0.000149673979834437	NR3C1/MAPK1/NR3C2/PARP1/AR/ESR1/PPARD	7
BP	GO:0018107	peptidyl-threonine phosphorylation	6/137	96/18888	0.0625	8.61678832116788	6.39514738297863	7.08258760882874e-05	0.00033854422433399	0.000151841345467876	AKT1/MAPK1/EGF/MAPK8/CDK1/PRKCA	6
BP	GO:1900745	positive regulation of p38MAPK cascade	4/137	31/18888	0.129032258064516	17.7894984695079	7.99671883437402	7.15867460592938e-05	0.000341763341992477	0.000153285160252919	IL1B/VEGFA/NCF1/XDH	4
BP	GO:0071560	cellular response to transforming growth factor beta stimulus	10/137	302/18888	0.033112582781457	4.56518586551941	5.33854	7.21463352708365e-05	0.000344014842571916	0.000154294986599761	NR3C1/TP53/PPARG/TGFB1/HSPA5/JUN/PARP1/FOS/ADAM17/APAF1	10
BP	GO:0009205	purine ribonucleoside triphosphate metabolic process	9/137	244/18888	0.0368852459016393	5.08531769773842	5.49010636186406	7.37492274781813e-05	0.000351229573008147	0.000157530884003654	INSR/IFNG/TGFB1/PRKACA/HIF1A/PARP1/HSPA8/GPI/TPI1	9
BP	GO:0046324	regulation of glucose import	5/137	60/18888	0.0833333333333333	11.4890510948905	6.95567510476785	7.39754223319676e-05	0.000351450669888206	0.000157630048737044	TNF/INSR/AKT1/ACE/MAPK14	5
BP	GO:0097300	programmed necrotic cell death	5/137	60/18888	0.0833333333333333	11.4890510948905	6.95567510476785	7.39754223319676e-05	0.000351450669888206	0.000157630048737044	TP53/TNF/CASP8/BAX/PARP1	5
BP	GO:0051092	positive regulation of NF-kappaB transcription factor activity	7/137	141/18888	0.049645390070922	6.84454107780711	5.95420302235991	7.63131014483802e-05	0.000362116779931027	0.000162413933332909	TNF/CD40LG/IL1B/CHUK/S100A9/RELA/AR	7
BP	GO:0033083	regulation of immature T cell proliferation	3/137	12/18888	0.25	34.4671532846715	9.91251753006816	7.82883668919108e-05	0.000368360426651469	0.000165214287468394	IL1B/IL1A/ERBB2	3
BP	GO:0033084	regulation of immature T cell proliferation in thymus	3/137	12/18888	0.25	34.4671532846715	9.91251753006816	7.82883668919108e-05	0.000368360426651469	0.000165214287468394	IL1B/IL1A/ERBB2	3
BP	GO:0070943	neutrophil-mediated killing of symbiont cell	3/137	12/18888	0.25	34.4671532846715	9.91251753006816	7.82883668919108e-05	0.000368360426651469	0.000165214287468394	F2/CTSG/TREM1	3
BP	GO:0071394	cellular response to testosterone stimulus	3/137	12/18888	0.25	34.4671532846715	9.91251753006816	7.82883668919108e-05	0.000368360426651469	0.000165214287468394	SPP1/NCF1/AR	3
BP	GO:0071493	cellular response to UV-B	3/137	12/18888	0.25	34.4671532846715	9.91251753006816	7.82883668919108e-05	0.000368360426651469	0.000165214287468394	MME/CDKN1A/MAPK14	3
BP	GO:0097048	dendritic cell apoptotic process	3/137	12/18888	0.25	34.4671532846715	9.91251753006816	7.82883668919108e-05	0.000368360426651469	0.000165214287468394	BCL2/BCL2L1/AXL	3
BP	GO:2000668	regulation of dendritic cell apoptotic process	3/137	12/18888	0.25	34.4671532846715	9.91251753006816	7.82883668919108e-05	0.000368360426651469	0.000165214287468394	BCL2/BCL2L1/AXL	3
BP	GO:0002703	regulation of leukocyte mediated immunity	9/137	246/18888	0.0365853658536585	5.04397365141535	5.45706561656157	7.8507390089848e-05	0.000368946989484742	0.000165477368281486	IL10/TNF/IL6/IL1B/TGFB1/ICAM1/IL2/NOS2/SYK	9
BP	GO:0009191	ribonucleoside diphosphate catabolic process	6/137	98/18888	0.0612244897959184	8.4409354982869	6.31257781210893	7.94731296207732e-05	0.000371698489015817	0.00016671145045103	INSR/IFNG/PRKACA/HIF1A/GPI/TPI1	6
BP	GO:0034109	homotypic cell-cell adhesion	6/137	98/18888	0.0612244897959184	8.4409354982869	6.31257781210893	7.94731296207732e-05	0.000371698489015817	0.00016671145045103	IL6/CCL5/HSPB1/CTSG/PRKCA/SYK	6
BP	GO:0046031	ADP metabolic process	6/137	98/18888	0.0612244897959184	8.4409354982869	6.31257781210893	7.94731296207732e-05	0.000371698489015817	0.00016671145045103	INSR/IFNG/PRKACA/HIF1A/GPI/TPI1	6
BP	GO:0070664	negative regulation of leukocyte proliferation	6/137	98/18888	0.0612244897959184	8.4409354982869	6.31257781210893	7.94731296207732e-05	0.000371698489015817	0.00016671145045103	IL10/CRP/IL2/CASP3/ERBB2/GSTP1	6
BP	GO:0043470	regulation of carbohydrate catabolic process	5/137	61/18888	0.0819672131147541	11.3007059949743	6.88764737644743	8.01142788645511e-05	0.000373802900191402	0.000167655305349004	TP53/INSR/IFNG/PRKACA/HIF1A	5
BP	GO:0051785	positive regulation of nuclear division	5/137	61/18888	0.0819672131147541	11.3007059949743	6.88764737644743	8.01142788645511e-05	0.000373802900191402	0.000167655305349004	TNF/INSR/IL1B/IL1A/EGF	5
BP	GO:0002695	negative regulation of leukocyte activation	8/137	192/18888	0.0416666666666667	5.74452554744526	5.64805101794958	8.05267921268548e-05	0.000375279805978548	0.000168317716182598	IL10/IL2/CASP3/IRF1/CTSG/LGALS3/AXL/ERBB2	8
BP	GO:0006308	DNA catabolic process	4/137	32/18888	0.125	17.2335766423358	7.85586437274503	8.13548993480485e-05	0.000377340043239466	0.000169241758523879	IL6/BAX/APAF1/ISG20	4
BP	GO:0033032	regulation of myeloid cell apoptotic process	4/137	32/18888	0.125	17.2335766423358	7.85586437274503	8.13548993480485e-05	0.000377340043239466	0.000169241758523879	CCL5/BCL2/MIF/ADAM17	4
BP	GO:0070498	interleukin-1-mediated signaling pathway	4/137	32/18888	0.125	17.2335766423358	7.85586437274503	8.13548993480485e-05	0.000377340043239466	0.000169241758523879	IL6/IL1B/NFKBIA/RELA	4
BP	GO:1901889	negative regulation of cell junction assembly	4/137	32/18888	0.125	17.2335766423358	7.85586437274503	8.13548993480485e-05	0.000377340043239466	0.000169241758523879	PTEN/TNF/IL1B/ACE	4
BP	GO:0001889	liver development	7/137	143/18888	0.048951048951049	6.74881323056506	5.89838413203582	8.33955608885968e-05	0.00038634673350049	0.000173281372462462	IL10/TNF/IL6/EGFR/SOD2/CYP1A1/RELA	7
BP	GO:0045930	negative regulation of mitotic cell cycle	9/137	248/18888	0.0362903225806452	5.00329644454909	5.42438109980797	8.35212311010407e-05	0.000386471022017834	0.000173337117426763	TP53/PTEN/IL10/TNF/EGFR/CCL2/BCL2/CDK1/CDKN1A	9
BP	GO:0002449	lymphocyte mediated immunity	11/137	372/18888	0.0295698924731183	4.07676006592889	5.12296124919529	8.62772793130948e-05	0.000398534207263687	0.000178747607834514	IL10/TNF/CD40LG/IL6/IL1B/TGFB1/ICAM1/IL2/C1S/C1R/HPRT1	11
BP	GO:0050777	negative regulation of immune response	8/137	194/18888	0.0412371134020619	5.68530363458499	5.60682554741161	8.65685692410753e-05	0.000398534207263687	0.000178747607834514	IL10/PPARG/TGFB1/IL2/PARP1/LGALS3/MAPK14/SYK	8
BP	GO:0002090	regulation of receptor internalization	5/137	62/18888	0.0806451612903226	11.1184365434424	6.82118434733532	8.66378711442797e-05	0.000398534207263687	0.000178747607834514	INSR/VEGFA/EGF/SELE/SYK	5
BP	GO:1903078	positive regulation of protein localization to plasma membrane	5/137	62/18888	0.0806451612903226	11.1184365434424	6.82118434733532	8.66378711442797e-05	0.000398534207263687	0.000178747607834514	TNF/AKT1/EGFR/IFNG/LGALS3	5
BP	GO:2000351	regulation of endothelial cell apoptotic process	5/137	62/18888	0.0806451612903226	11.1184365434424	6.82118434733532	8.66378711442797e-05	0.000398534207263687	0.000178747607834514	TNF/CD40LG/TGFB1/CCL2/ICAM1	5
BP	GO:0001909	leukocyte mediated cytotoxicity	7/137	144/18888	0.0486111111111111	6.70194647201946	5.87087455912228	8.71327026793508e-05	0.000399355872901731	0.000179116135214506	TGFB1/F2/ICAM1/NOS2/CTSG/TREM1/HPRT1	7
BP	GO:0034763	negative regulation of transmembrane transport	7/137	144/18888	0.0486111111111111	6.70194647201946	5.87087455912228	8.71327026793508e-05	0.000399355872901731	0.000179116135214506	TNF/AKT1/IL1B/ACE/MMP9/BCL2/PRKCB	7
BP	GO:0071559	response to transforming growth factor beta	10/137	309/18888	0.0323624595469256	4.46176741549146	5.24439645208265	8.72250423166441e-05	0.000399355872901731	0.000179116135214506	NR3C1/TP53/PPARG/TGFB1/HSPA5/JUN/PARP1/FOS/ADAM17/APAF1	10
BP	GO:1904062	regulation of monoatomic cation transmembrane transport	10/137	309/18888	0.0323624595469256	4.46176741549146	5.24439645208265	8.72250423166441e-05	0.000399355872901731	0.000179116135214506	IFNG/F2/PRKACA/MMP9/BCL2/CXCL10/BAX/CXCL11/CTSS/SCN5A	10
BP	GO:0009144	purine nucleoside triphosphate metabolic process	9/137	250/18888	0.036	4.9632700729927	5.3920458363179	8.88016184890825e-05	0.000406098629581652	0.000182140346448521	INSR/IFNG/TGFB1/PRKACA/HIF1A/PARP1/HSPA8/GPI/TPI1	9
BP	GO:0032006	regulation of TOR signaling	7/137	145/18888	0.0482758620689655	6.65572615152278	5.84362553625721	9.10052828326157e-05	0.000415690018546177	0.000186442205114532	AKT1/PRKACA/F3/HIF1A/PIM1/F10/SYK	7
BP	GO:0009199	ribonucleoside triphosphate metabolic process	9/137	251/18888	0.0358565737051793	4.94349608863815	5.3760070474939	9.15452532438363e-05	0.000417668541637573	0.000187329597622344	INSR/IFNG/TGFB1/PRKACA/HIF1A/PARP1/HSPA8/GPI/TPI1	9
BP	GO:0010743	regulation of macrophage derived foam cell differentiation	4/137	33/18888	0.121212121212121	16.7113470471135	7.72123339255628	9.20575244866882e-05	0.000419516224642134	0.000188158306704481	CRP/PPARG/NFKBIA/PLA2G10	4
BP	GO:0043255	regulation of carbohydrate biosynthetic process	6/137	101/18888	0.0594059405940594	8.19021464190214	6.19303281408836	9.40013235525389e-05	0.000426881736458103	0.000191461831454893	NR3C1/INSR/AKT1/TGFB1/PRKACA/EGF	6
BP	GO:1990868	response to chemokine	6/137	101/18888	0.0594059405940594	8.19021464190214	6.19303281408836	9.40013235525389e-05	0.000426881736458103	0.000191461831454893	CXCL8/CCL2/CCL5/CXCL10/HIF1A/CXCL11	6
BP	GO:1990869	cellular response to chemokine	6/137	101/18888	0.0594059405940594	8.19021464190214	6.19303281408836	9.40013235525389e-05	0.000426881736458103	0.000191461831454893	CXCL8/CCL2/CCL5/CXCL10/HIF1A/CXCL11	6
BP	GO:0061008	hepaticobiliary system development	7/137	146/18888	0.0479452054794521	6.61013898610139	5.8166326745902	9.50170053814827e-05	0.000430993609096981	0.000193306058084687	IL10/TNF/IL6/EGFR/SOD2/CYP1A1/RELA	7
BP	GO:0002520	immune system development	8/137	197/18888	0.0406091370558376	5.59872540664715	5.54605126240142	9.63329915019726e-05	0.000436456543189702	0.000195756252780736	TP53/IL10/CD40LG/MAPK1/TGFB1/IL2/BCL2/ADAM17	8
BP	GO:0007200	phospholipase C-activating G protein-coupled receptor signaling pathway	6/137	102/18888	0.0588235294117647	8.10991841992271	6.15427787371409	9.92873447155392e-05	0.000448801754725732	0.000201293235529161	CHRM1/CHRM3/CHRM2/F2/ESR1/PRKCB	6
BP	GO:0009134	nucleoside diphosphate catabolic process	6/137	102/18888	0.0588235294117647	8.10991841992271	6.15427787371409	9.92873447155392e-05	0.000448801754725732	0.000201293235529161	INSR/IFNG/PRKACA/HIF1A/GPI/TPI1	6
BP	GO:0009150	purine ribonucleotide metabolic process	12/137	446/18888	0.0269058295964126	3.70946941180321	4.94968122386432	0.000100455553959686	0.000451858549165251	0.000202664246307527	INSR/IFNG/TGFB1/PRKACA/HIF1A/PARP1/XDH/HSPA8/GPI/TPI1/PNP/HPRT1	12
BP	GO:0043124	negative regulation of canonical NF-kappaB signal transduction	5/137	64/18888	0.078125	10.7709854014599	6.69270913762785	0.000100904688679635	0.000451858549165251	0.000202664246307527	STAT1/CASP8/NFKBIA/ESR1/GSTP1	5
BP	GO:0048247	lymphocyte chemotaxis	5/137	64/18888	0.078125	10.7709854014599	6.69270913762785	0.000100904688679635	0.000451858549165251	0.000202664246307527	CCL2/CCL5/CXCL10/ADAM17/CXCL11	5
BP	GO:0071384	cellular response to corticosteroid stimulus	5/137	64/18888	0.078125	10.7709854014599	6.69270913762785	0.000100904688679635	0.000451858549165251	0.000202664246307527	NR3C1/CYP1B1/EGFR/ACE/CASP9	5
BP	GO:2001244	positive regulation of intrinsic apoptotic signaling pathway	5/137	64/18888	0.078125	10.7709854014599	6.69270913762785	0.000100904688679635	0.000451858549165251	0.000202664246307527	TP53/MMP2/MYC/BAX/S100A9	5
BP	GO:0033079	immature T cell proliferation	3/137	13/18888	0.230769230769231	31.8158338012353	9.5001765450031	0.00010123480538843	0.000451858549165251	0.000202664246307527	IL1B/IL1A/ERBB2	3
BP	GO:0033080	immature T cell proliferation in thymus	3/137	13/18888	0.230769230769231	31.8158338012353	9.5001765450031	0.00010123480538843	0.000451858549165251	0.000202664246307527	IL1B/IL1A/ERBB2	3
BP	GO:0042362	fat-soluble vitamin biosynthetic process	3/137	13/18888	0.230769230769231	31.8158338012353	9.5001765450031	0.00010123480538843	0.000451858549165251	0.000202664246307527	CYP3A4/TNF/IFNG	3
BP	GO:0045737	positive regulation of cyclin-dependent protein serine/threonine kinase activity	3/137	13/18888	0.230769230769231	31.8158338012353	9.5001765450031	0.00010123480538843	0.000451858549165251	0.000202664246307527	AKT1/EGFR/ADAM17	3
BP	GO:0051918	negative regulation of fibrinolysis	3/137	13/18888	0.230769230769231	31.8158338012353	9.5001765450031	0.00010123480538843	0.000451858549165251	0.000202664246307527	THBD/F2/PLAT	3
BP	GO:1903624	regulation of DNA catabolic process	3/137	13/18888	0.230769230769231	31.8158338012353	9.5001765450031	0.00010123480538843	0.000451858549165251	0.000202664246307527	IL6/BAX/APAF1	3
BP	GO:0007435	salivary gland morphogenesis	4/137	34/18888	0.117647058823529	16.2198368398454	7.59236818593098	0.00010374736816901	0.000460968419932759	0.000206750138001878	TNF/EGFR/TGFB1/CDC42	4
BP	GO:0009112	nucleobase metabolic process	4/137	34/18888	0.117647058823529	16.2198368398454	7.59236818593098	0.00010374736816901	0.000460968419932759	0.000206750138001878	MAPK1/TTR/XDH/HPRT1	4
BP	GO:0050901	leukocyte tethering or rolling	4/137	34/18888	0.117647058823529	16.2198368398454	7.59236818593098	0.00010374736816901	0.000460968419932759	0.000206750138001878	TNF/SELP/SELE/VCAM1	4
BP	GO:1902253	regulation of intrinsic apoptotic signaling pathway by p53 class mediator	4/137	34/18888	0.117647058823529	16.2198368398454	7.59236818593098	0.00010374736816901	0.000460968419932759	0.000206750138001878	TP53/BCL2/MYC/MIF	4
BP	GO:0010821	regulation of mitochondrion organization	7/137	149/18888	0.0469798657718121	6.47704893940136	5.73714870710894	0.000107925052300326	0.000477901420718316	0.000214344801969771	TP53/AKT1/PPARG/MMP9/BAX/HIF1A/BCL2L1	7
BP	GO:0035148	tube formation	7/137	149/18888	0.0469798657718121	6.47704893940136	5.73714870710894	0.000107925052300326	0.000477901420718316	0.000214344801969771	VEGFA/TGFB1/PRKACA/CASP3/EGF/HIF1A/APAF1	7
BP	GO:0050768	negative regulation of neurogenesis	7/137	149/18888	0.0469798657718121	6.47704893940136	5.73714870710894	0.000107925052300326	0.000477901420718316	0.000214344801969771	TP53/PTEN/TNF/IL6/IL1B/F2/SPP1	7
BP	GO:0070059	intrinsic apoptotic signaling pathway in response to endoplasmic reticulum stress	5/137	65/18888	0.0769230769230769	10.6052779337451	6.63058352108864	0.0001086814689931	0.000480706497469483	0.000215602914196839	TP53/BCL2/BAX/BCL2L1/APAF1	5
BP	GO:0043588	skin development	10/137	318/18888	0.0314465408805031	4.33549097920397	5.12739688722879	0.000110474774909108	0.000488086293666229	0.00021891284567181	TNF/EGFR/IL1A/CASP3/BCL2/VDR/CLDN4/RELA/PLA2G10/CDKN1A	10
BP	GO:0050728	negative regulation of inflammatory response	8/137	201/18888	0.0398009950248756	5.48730798561935	5.46693198789075	0.000110756150071375	0.000488777140834174	0.000219222699321506	IL10/PPARG/IL2/PLA2G10/GSTP1/MAPK14/PPARD/SYK	8
BP	GO:0051701	biological process involved in interaction with host	8/137	202/18888	0.0396039603960396	5.46014309460143	5.44748272493328	0.000114628156491179	0.000505294353867544	0.000226630877249516	INSR/AKT1/EGFR/CXCL8/ICAM1/CTSB/AXL/CDK1	8
BP	GO:0002719	negative regulation of cytokine production involved in immune response	4/137	35/18888	0.114285714285714	15.7564129301356	7.46885700733881	0.000116478044232631	0.00051246463113859	0.000229846836849345	IL10/TNF/TGFB1/AXL	4
BP	GO:1905477	positive regulation of protein localization to membrane	6/137	105/18888	0.0571428571428571	7.87820646506778	6.04111266307788	0.0001165776251353	0.00051246463113859	0.000229846836849345	TNF/AKT1/EGFR/IFNG/LGALS3/ERBB2	6
BP	GO:0042531	positive regulation of tyrosine phosphorylation of STAT protein	5/137	66/18888	0.0757575757575758	10.4445919044459	6.56979528434534	0.000116910089763586	0.00051246463113859	0.000229846836849345	TNF/IL6/IFNG/IL2/CCL5	5
BP	GO:0045453	bone resorption	5/137	66/18888	0.0757575757575758	10.4445919044459	6.56979528434534	0.000116910089763586	0.00051246463113859	0.000229846836849345	IL6/EGFR/SPP1/PRKCA/SYK	5
BP	GO:1901224	positive regulation of non-canonical NF-kappaB signal transduction	5/137	66/18888	0.0757575757575758	10.4445919044459	6.56979528434534	0.000116910089763586	0.00051246463113859	0.000229846836849345	TNF/EGFR/IL1B/NR3C2/RELA	5
BP	GO:0048568	embryonic organ development	12/137	455/18888	0.0263736263736264	3.63609529156974	4.86517368480584	0.000121165525002387	0.000529929757001492	0.000237680165611653	TP53/IL10/TNF/AKT1/EGFR/MAPK1/VEGFA/CXCL8/TGFB1/CASP8/HIF1A/CDC42	12
BP	GO:1901987	regulation of cell cycle phase transition	12/137	455/18888	0.0263736263736264	3.63609529156974	4.86517368480584	0.000121165525002387	0.000529929757001492	0.000237680165611653	TP53/PTEN/AKT1/EGFR/CCL2/BCL2/ADAM17/CYP1A1/CDK1/CDKN1A/E2F1/MAPK14	12
BP	GO:0008544	epidermis development	11/137	387/18888	0.0284237726098191	3.91874610988514	4.95888180323567	0.000122277120355556	0.00053419390010081	0.000239592687459402	TNF/INSR/EGFR/IL1A/CASP3/BCL2/VDR/CLDN4/RELA/PLA2G10/CDKN1A	11
BP	GO:0018210	peptidyl-threonine modification	6/137	106/18888	0.0566037735849057	7.80388376256714	6.00438397051776	0.00012284374495531	0.000536070360240246	0.000240434303448714	AKT1/MAPK1/EGF/MAPK8/CDK1/PRKCA	6
BP	GO:0070301	cellular response to hydrogen peroxide	5/137	67/18888	0.0746268656716418	10.2887024730363	6.51029492333591	0.000125608158311738	0.000547522741358857	0.000245570840517932	CYP1B1/IL6/RELA/AXL/CDK1	5
BP	GO:0009158	ribonucleoside monophosphate catabolic process	3/137	14/18888	0.214285714285714	29.5432742440042	9.13198920746391	0.000128160800091488	0.000554323814554996	0.000248621207443431	XDH/PNP/HPRT1	3
BP	GO:0010745	negative regulation of macrophage derived foam cell differentiation	3/137	14/18888	0.214285714285714	29.5432742440042	9.13198920746391	0.000128160800091488	0.000554323814554996	0.000248621207443431	CRP/PPARG/NFKBIA	3
BP	GO:0030213	hyaluronan biosynthetic process	3/137	14/18888	0.214285714285714	29.5432742440042	9.13198920746391	0.000128160800091488	0.000554323814554996	0.000248621207443431	IL1B/TGFB1/EGF	3
BP	GO:0032621	interleukin-18 production	3/137	14/18888	0.214285714285714	29.5432742440042	9.13198920746391	0.000128160800091488	0.000554323814554996	0.000248621207443431	IL10/TNF/CASP1	3
BP	GO:0032661	regulation of interleukin-18 production	3/137	14/18888	0.214285714285714	29.5432742440042	9.13198920746391	0.000128160800091488	0.000554323814554996	0.000248621207443431	IL10/TNF/CASP1	3
BP	GO:0034116	positive regulation of heterotypic cell-cell adhesion	3/137	14/18888	0.214285714285714	29.5432742440042	9.13198920746391	0.000128160800091488	0.000554323814554996	0.000248621207443431	IL10/TNF/IL1B	3
BP	GO:0070942	neutrophil mediated cytotoxicity	3/137	14/18888	0.214285714285714	29.5432742440042	9.13198920746391	0.000128160800091488	0.000554323814554996	0.000248621207443431	F2/CTSG/TREM1	3
BP	GO:0016486	peptide hormone processing	4/137	36/18888	0.111111111111111	15.3187347931873	7.35032829718943	0.00013030399195462	0.000562349457552497	0.000252220809337047	ACE/CTSG/BCHE/REN	4
BP	GO:1904385	cellular response to angiotensin	4/137	36/18888	0.111111111111111	15.3187347931873	7.35032829718943	0.00013030399195462	0.000562349457552497	0.000252220809337047	ACE/CA2/RELA/PRKCA	4
BP	GO:0042987	amyloid precursor protein catabolic process	5/137	68/18888	0.0735294117647059	10.1373980249034	6.45203547842523	0.000134793608545443	0.000581083803101081	0.000260623399102544	TNF/IFNG/CASP3/ADAM17/RELA	5
BP	GO:0019216	regulation of lipid metabolic process	10/137	326/18888	0.0306748466257669	4.22909856253638	5.02698134976411	0.000135354795292486	0.000582860407041433	0.000261420228329796	NR3C1/TNF/AKT1/IL1B/IFNG/PPARG/F2/IL1A/PPARD/PTGS2	10
BP	GO:0051961	negative regulation of nervous system development	7/137	155/18888	0.0451612903225806	6.22632446432776	5.58454902409438	0.000138027780730504	0.000593716856607558	0.00026628948259744	TP53/PTEN/TNF/IL6/IL1B/F2/SPP1	7
BP	GO:0050851	antigen receptor-mediated signaling pathway	8/137	208/18888	0.0384615384615385	5.30263896687254	5.33344344740572	0.000140285478315476	0.000602765077157705	0.000270347723393387	MAPK1/BCL2/BAX/NFKBIA/RELA/LGALS3/PRKCB/SYK	8
BP	GO:0009141	nucleoside triphosphate metabolic process	9/137	266/18888	0.0338345864661654	4.66472751221118	5.14516021221727	0.000142055582183805	0.000609700687528736	0.000273458431935085	INSR/IFNG/TGFB1/PRKACA/HIF1A/PARP1/HSPA8/GPI/TPI1	9
BP	GO:0043433	negative regulation of DNA-binding transcription factor activity	7/137	156/18888	0.0448717948717949	6.18641212801797	5.55989776155074	0.000143649230398098	0.000615864573307636	0.000276223012284432	CYP1B1/IL10/CHUK/NFKBIA/PLA2G10/PIM1/ESR1	7
BP	GO:0019229	regulation of vasoconstriction	5/137	69/18888	0.072463768115942	9.99047921294827	6.39497	0.000144484697803702	0.000618090993886735	0.000277221589935469	CHRM3/EGFR/MMP2/ACE/PTGS2	5
BP	GO:0030193	regulation of blood coagulation	5/137	69/18888	0.072463768115942	9.99047921294827	6.39497	0.000144484697803702	0.000618090993886735	0.000277221589935469	THBD/F2/NOS3/F3/PLAT	5
BP	GO:0007431	salivary gland development	4/137	37/18888	0.108108108108108	14.904714933912	7.23644576914015	0.000145280435181742	0.000620138102140407	0.000278139743751761	TNF/EGFR/TGFB1/CDC42	4
BP	GO:0071404	cellular response to low-density lipoprotein particle stimulus	4/137	37/18888	0.108108108108108	14.904714933912	7.23644576914015	0.000145280435181742	0.000620138102140407	0.000278139743751761	AKT1/PPARG/TGFB1/SYK	4
BP	GO:0009135	purine nucleoside diphosphate metabolic process	6/137	110/18888	0.0545454545454545	7.52010617120106	5.86213613502896	0.000150632283379918	0.000640883817209443	0.000287444458061901	INSR/IFNG/PRKACA/HIF1A/GPI/TPI1	6
BP	GO:0009179	purine ribonucleoside diphosphate metabolic process	6/137	110/18888	0.0545454545454545	7.52010617120106	5.86213613502896	0.000150632283379918	0.000640883817209443	0.000287444458061901	INSR/IFNG/PRKACA/HIF1A/GPI/TPI1	6
BP	GO:0031341	regulation of cell killing	6/137	110/18888	0.0545454545454545	7.52010617120106	5.86213613502896	0.000150632283379918	0.000640883817209443	0.000287444458061901	IFNG/TGFB1/ICAM1/NOS2/MAPK8/SYK	6
BP	GO:0009259	ribonucleotide metabolic process	12/137	466/18888	0.0257510729613734	3.55026471601767	4.76474198831156	0.000151372221872363	0.000643331942957544	0.000288542473271576	INSR/IFNG/TGFB1/PRKACA/HIF1A/PARP1/XDH/HSPA8/GPI/TPI1/PNP/HPRT1	12
BP	GO:0048762	mesenchymal cell differentiation	9/137	269/18888	0.033457249070632	4.61270452880362	5.10105450919447	0.000154539044466062	0.000654628803033448	0.00029360925719578	PTEN/IL6/IL1B/MAPK1/TGFB1/STAT1/BCL2/HIF1A/CDC42	9
BP	GO:0043627	response to estrogen	5/137	70/18888	0.0714285714285714	9.84775808133472	6.33906323711009	0.000154700003581306	0.000654628803033448	0.00029360925719578	MMP2/MME/HSP90AA1/AR/ESR1	5
BP	GO:2000401	regulation of lymphocyte migration	5/137	70/18888	0.0714285714285714	9.84775808133472	6.33906323711009	0.000154700003581306	0.000654628803033448	0.00029360925719578	AKT1/CCL2/CCL5/CXCL10/ADAM17	5
BP	GO:2000573	positive regulation of DNA biosynthetic process	5/137	70/18888	0.0714285714285714	9.84775808133472	6.33906323711009	0.000154700003581306	0.000654628803033448	0.00029360925719578	CYP1B1/TNF/MAPK1/MYC/HSP90AA1	5
BP	GO:0016052	carbohydrate catabolic process	7/137	158/18888	0.0443037974683544	6.10810311373926	5.51123420418981	0.000155449495430337	0.000657089218521747	0.00029471278450861	TP53/INSR/IFNG/PRKACA/HIF1A/GPI/TPI1	7
BP	GO:0090277	positive regulation of peptide hormone secretion	6/137	111/18888	0.0540540540540541	7.45235746695601	5.82768894122631	0.000158301476484125	0.000667700941804668	0.000299472275958158	CHRM3/EGFR/F2/PRKACA/HIF1A/PRKCB	6
BP	GO:0090398	cellular senescence	6/137	111/18888	0.0540540540540541	7.45235746695601	5.82768894122631	0.000158301476484125	0.000667700941804668	0.000299472275958158	TP53/PTEN/MIF/MAPK8/CDKN1A/MAPK14	6
BP	GO:0002903	negative regulation of B cell apoptotic process	3/137	15/18888	0.2	27.5737226277372	8.80049527299705	0.000159351432576627	0.000670682563374179	0.000300809570758213	IL2/BCL2/MIF	3
BP	GO:0009404	toxin metabolic process	3/137	15/18888	0.2	27.5737226277372	8.80049527299705	0.000159351432576627	0.000670682563374179	0.000300809570758213	CYP3A4/CYP1B1/CYP1A1	3
BP	GO:0042594	response to starvation	8/137	212/18888	0.0377358490566038	5.20258917504476	5.25983950010506	0.000159890500030686	0.000672227801204281	0.000301502629373087	TP53/MAPK1/BCL2/HSPA5/FOS/MAPK8/HSPA8/CDKN1A	8
BP	GO:0010661	positive regulation of muscle cell apoptotic process	4/137	38/18888	0.105263157894737	14.5124855935459	7.12690421247871	0.000161463342282996	0.000673050819111424	0.00030187176326279	TP53/IFNG/PPARG/SOD2	4
BP	GO:0031281	positive regulation of cyclase activity	4/137	38/18888	0.105263157894737	14.5124855935459	7.12690421247871	0.000161463342282996	0.000673050819111424	0.00030187176326279	NOS3/NOS2/MAPK8/MAPK14	4
BP	GO:0032885	regulation of polysaccharide biosynthetic process	4/137	38/18888	0.105263157894737	14.5124855935459	7.12690421247871	0.000161463342282996	0.000673050819111424	0.00030187176326279	INSR/AKT1/TGFB1/EGF	4
BP	GO:0034391	regulation of smooth muscle cell apoptotic process	4/137	38/18888	0.105263157894737	14.5124855935459	7.12690421247871	0.000161463342282996	0.000673050819111424	0.00030187176326279	IFNG/PPARG/SOD2/ESR1	4
BP	GO:0045981	positive regulation of nucleotide metabolic process	4/137	38/18888	0.105263157894737	14.5124855935459	7.12690421247871	0.000161463342282996	0.000673050819111424	0.00030187176326279	INSR/IFNG/NOS3/NOS2	4
BP	GO:0055094	response to lipoprotein particle	4/137	38/18888	0.105263157894737	14.5124855935459	7.12690421247871	0.000161463342282996	0.000673050819111424	0.00030187176326279	AKT1/PPARG/TGFB1/SYK	4
BP	GO:0071392	cellular response to estradiol stimulus	4/137	38/18888	0.105263157894737	14.5124855935459	7.12690421247871	0.000161463342282996	0.000673050819111424	0.00030187176326279	IL10/EGFR/MMP2/ESR1	4
BP	GO:1900544	positive regulation of purine nucleotide metabolic process	4/137	38/18888	0.105263157894737	14.5124855935459	7.12690421247871	0.000161463342282996	0.000673050819111424	0.00030187176326279	INSR/IFNG/NOS3/NOS2	4
BP	GO:0051348	negative regulation of transferase activity	8/137	213/18888	0.0375586854460094	5.17816387375347	5.24172850518687	0.000165129114088641	0.000686775395692271	0.000308027408594245	PTEN/AKT1/IL1B/IFNG/PPARG/HSPB1/CDKN1A/GSTP1	8
BP	GO:0032091	negative regulation of protein binding	5/137	71/18888	0.0704225352112676	9.70905726328776	6.28426781304773	0.000165458420138649	0.000686775395692271	0.000308027408594245	IL10/AKT1/BAX/MAPK8/CDKN1A	5
BP	GO:0071677	positive regulation of mononuclear cell migration	5/137	71/18888	0.0704225352112676	9.70905726328776	6.28426781304773	0.000165458420138649	0.000686775395692271	0.000308027408594245	TNF/CCL5/CXCL10/ADAM17/LGALS3	5
BP	GO:1900046	regulation of hemostasis	5/137	71/18888	0.0704225352112676	9.70905726328776	6.28426781304773	0.000165458420138649	0.000686775395692271	0.000308027408594245	THBD/F2/NOS3/F3/PLAT	5
BP	GO:0002793	positive regulation of peptide secretion	6/137	113/18888	0.0530973451327434	7.32045733479749	5.76006401170156	0.000174565732494831	0.000723809134734665	0.000324637506654449	CHRM3/EGFR/F2/PRKACA/HIF1A/PRKCB	6
BP	GO:0045619	regulation of lymphocyte differentiation	8/137	215/18888	0.0372093023255814	5.12999	5.20584525346571	0.000176031021868558	0.000729111541849641	0.000327015702980617	IL10/IFNG/IL2/IRF1/AXL/ERBB2/PNP/SYK	8
BP	GO:0032008	positive regulation of TOR signaling	5/137	72/18888	0.0694444444444444	9.57420924574209	6.23054777830533	0.000176779155000941	0.000729890703330179	0.000327365166711019	AKT1/F3/PIM1/F10/SYK	5
BP	GO:1900076	regulation of cellular response to insulin stimulus	5/137	72/18888	0.0694444444444444	9.57420924574209	6.23054777830533	0.000176779155000941	0.000729890703330179	0.000327365166711019	IL1B/PPARG/RELA/CTSD/PRKCB	5
BP	GO:1903578	regulation of ATP metabolic process	5/137	72/18888	0.0694444444444444	9.57420924574209	6.23054777830533	0.000176779155000941	0.000729890703330179	0.000327365166711019	INSR/IFNG/PRKACA/HIF1A/PARP1	5
BP	GO:0001990	regulation of systemic arterial blood pressure by hormone	4/137	39/18888	0.102564102564103	14.1403705783268	7.02142588970201	0.000178909386912233	0.000735579077630738	0.000329916474177631	ACE/NOS3/CTSG/REN	4
BP	GO:0034390	smooth muscle cell apoptotic process	4/137	39/18888	0.102564102564103	14.1403705783268	7.02142588970201	0.000178909386912233	0.000735579077630738	0.000329916474177631	IFNG/PPARG/SOD2/ESR1	4
BP	GO:0043388	positive regulation of DNA binding	4/137	39/18888	0.102564102564103	14.1403705783268	7.02142588970201	0.000178909386912233	0.000735579077630738	0.000329916474177631	IFNG/PPARG/MMP9/EGF	4
BP	GO:0097242	amyloid-beta clearance	4/137	39/18888	0.102564102564103	14.1403705783268	7.02142588970201	0.000178909386912233	0.000735579077630738	0.000329916474177631	TNF/INSR/IFNG/MME	4
BP	GO:0002753	cytoplasmic pattern recognition receptor signaling pathway	7/137	163/18888	0.0429447852760736	5.92073798755094	5.39315232575428	0.000188416863559076	0.000772508425258979	0.000346479751374737	TNF/AKT1/NFKBIA/PARP1/RELA/MAPK8/HSPA8	7
BP	GO:0044409	symbiont entry into host	7/137	163/18888	0.0429447852760736	5.92073798755094	5.39315232575428	0.000188416863559076	0.000772508425258979	0.000346479751374737	INSR/EGFR/CXCL8/ICAM1/CTSB/AXL/CDK1	7
BP	GO:0032481	positive regulation of type I interferon production	5/137	73/18888	0.0684931506849315	9.44305569443056	6.17786664843326	0.000188681725350978	0.000772508425258979	0.000346479751374737	STAT1/CHUK/IRF1/HSP90AA1/SYK	5
BP	GO:0045661	regulation of myoblast differentiation	5/137	73/18888	0.0684931506849315	9.44305569443056	6.17786664843326	0.000188681725350978	0.000772508425258979	0.000346479751374737	TNF/TGFB1/CXCL10/MAPK14/PPARD	5
BP	GO:0007252	I-kappaB phosphorylation	3/137	16/18888	0.1875	25.8503649635037	8.49989098209516	0.000195085097405444	0.000787998688900088	0.000353427329575325	TNF/AKT1/CHUK	3
BP	GO:0010819	regulation of T cell chemotaxis	3/137	16/18888	0.1875	25.8503649635037	8.49989098209516	0.000195085097405444	0.000787998688900088	0.000353427329575325	CCL5/CXCL10/ADAM17	3
BP	GO:0017014	protein nitrosylation	3/137	16/18888	0.1875	25.8503649635037	8.49989098209516	0.000195085097405444	0.000787998688900088	0.000353427329575325	ACE/NOS2/S100A9	3
BP	GO:0018119	peptidyl-cysteine S-nitrosylation	3/137	16/18888	0.1875	25.8503649635037	8.49989098209516	0.000195085097405444	0.000787998688900088	0.000353427329575325	ACE/NOS2/S100A9	3
BP	GO:0034112	positive regulation of homotypic cell-cell adhesion	3/137	16/18888	0.1875	25.8503649635037	8.49989098209516	0.000195085097405444	0.000787998688900088	0.000353427329575325	IL6/CCL5/CTSG	3
BP	GO:0045579	positive regulation of B cell differentiation	3/137	16/18888	0.1875	25.8503649635037	8.49989098209516	0.000195085097405444	0.000787998688900088	0.000353427329575325	IL10/IL2/SYK	3
BP	GO:0045651	positive regulation of macrophage differentiation	3/137	16/18888	0.1875	25.8503649635037	8.49989098209516	0.000195085097405444	0.000787998688900088	0.000353427329575325	TGFB1/CASP8/PRKCA	3
BP	GO:0050665	hydrogen peroxide biosynthetic process	3/137	16/18888	0.1875	25.8503649635037	8.49989098209516	0.000195085097405444	0.000787998688900088	0.000353427329575325	SOD2/CYP1A1/DUOX2	3
BP	GO:0051044	positive regulation of membrane protein ectodomain proteolysis	3/137	16/18888	0.1875	25.8503649635037	8.49989098209516	0.000195085097405444	0.000787998688900088	0.000353427329575325	TNF/IL1B/IFNG	3
BP	GO:0051770	positive regulation of nitric-oxide synthase biosynthetic process	3/137	16/18888	0.1875	25.8503649635037	8.49989098209516	0.000195085097405444	0.000787998688900088	0.000353427329575325	IFNG/CCL2/STAT1	3
BP	GO:0090336	positive regulation of brown fat cell differentiation	3/137	16/18888	0.1875	25.8503649635037	8.49989098209516	0.000195085097405444	0.000787998688900088	0.000353427329575325	PIM1/MAPK14/PTGS2	3
BP	GO:1903798	regulation of miRNA processing	3/137	16/18888	0.1875	25.8503649635037	8.49989098209516	0.000195085097405444	0.000787998688900088	0.000353427329575325	TP53/IL6/TGFB1	3
BP	GO:1904031	positive regulation of cyclin-dependent protein kinase activity	3/137	16/18888	0.1875	25.8503649635037	8.49989098209516	0.000195085097405444	0.000787998688900088	0.000353427329575325	AKT1/EGFR/ADAM17	3
BP	GO:0019362	pyridine nucleotide metabolic process	7/137	164/18888	0.0426829268292683	5.88463592665124	5.37012461859441	0.000195642810375337	0.000788622050069658	0.000353706914905385	TP53/INSR/IFNG/PRKACA/HIF1A/GPI/TPI1	7
BP	GO:0046496	nicotinamide nucleotide metabolic process	7/137	164/18888	0.0426829268292683	5.88463592665124	5.37012461859441	0.000195642810375337	0.000788622050069658	0.000353706914905385	TP53/INSR/IFNG/PRKACA/HIF1A/GPI/TPI1	7
BP	GO:0008210	estrogen metabolic process	4/137	40/18888	0.1	13.7868613138686	6.91975743202277	0.000197675909568829	0.000794360541021709	0.00035628070032095	CYP3A4/CYP1B1/CYP2C9/CYP1A1	4
BP	GO:0045923	positive regulation of fatty acid metabolic process	4/137	40/18888	0.1	13.7868613138686	6.91975743202277	0.000197675909568829	0.000794360541021709	0.00035628070032095	IL1B/PPARG/PPARD/PTGS2	4
BP	GO:0051385	response to mineralocorticoid	4/137	40/18888	0.1	13.7868613138686	6.91975743202277	0.000197675909568829	0.000794360541021709	0.00035628070032095	ACE/PARP1/FOS/CDKN1A	4
BP	GO:0019693	ribose phosphate metabolic process	12/137	480/18888	0.025	3.44671532846715	4.64120034107736	0.000198973930289615	0.000798755716049685	0.000358251991637845	INSR/IFNG/TGFB1/PRKACA/HIF1A/PARP1/XDH/HSPA8/GPI/TPI1/PNP/HPRT1	12
BP	GO:0033344	cholesterol efflux	5/137	74/18888	0.0675675675675676	9.31544683369501	6.12618966084092	0.000201185954319564	0.000803510808365163	0.000360384710388036	PPARG/EGF/PON1/NFKBIA/PLA2G10	5
BP	GO:0050818	regulation of coagulation	5/137	74/18888	0.0675675675675676	9.31544683369501	6.12618966084092	0.000201185954319564	0.000803510808365163	0.000360384710388036	THBD/F2/NOS3/F3/PLAT	5
BP	GO:0051881	regulation of mitochondrial membrane potential	5/137	74/18888	0.0675675675675676	9.31544683369501	6.12618966084092	0.000201185954319564	0.000803510808365163	0.000360384710388036	BCL2/BAX/PARP1/SOD2/BCL2L1	5
BP	GO:0070527	platelet aggregation	5/137	74/18888	0.0675675675675676	9.31544683369501	6.12618966084092	0.000201185954319564	0.000803510808365163	0.000360384710388036	IL6/HSPB1/CTSG/PRKCA/SYK	5
BP	GO:1904377	positive regulation of protein localization to cell periphery	5/137	74/18888	0.0675675675675676	9.31544683369501	6.12618966084092	0.000201185954319564	0.000803510808365163	0.000360384710388036	TNF/AKT1/EGFR/IFNG/LGALS3	5
BP	GO:0031929	TOR signaling	7/137	165/18888	0.0424242424242424	5.84897146648971	5.34728631804395	0.000203091085599397	0.000809465998668342	0.00036305568818992	AKT1/PRKACA/F3/HIF1A/PIM1/F10/SYK	7
BP	GO:0035051	cardiocyte differentiation	7/137	165/18888	0.0424242424242424	5.84897146648971	5.34728631804395	0.000203091085599397	0.000809465998668342	0.00036305568818992	EGFR/MAPK1/VEGFA/TGFB1/VCAM1/CDK1/CDC42	7
BP	GO:0062207	regulation of pattern recognition receptor signaling pathway	7/137	166/18888	0.0421686746987952	5.81373669861929	5.32463462520911	0.000210766760425992	0.000839203699863167	0.000376393421448926	AKT1/IRF1/PARP1/S100A9/MAPK8/HSPA8/ESR1	7
BP	GO:0045066	regulatory T cell differentiation	4/137	41/18888	0.0975609756097561	13.4505964037743	6.82166715343136	0.000217820879944535	0.000864649381302673	0.000387806129829117	IFNG/TGFB1/IL2/IRF1	4
BP	GO:0045730	respiratory burst	4/137	41/18888	0.0975609756097561	13.4505964037743	6.82166715343136	0.000217820879944535	0.000864649381302673	0.000387806129829117	INSR/MPO/NCF1/S100A9	4
BP	GO:0051281	positive regulation of release of sequestered calcium ion into cytosol	4/137	41/18888	0.0975609756097561	13.4505964037743	6.82166715343136	0.000217820879944535	0.000864649381302673	0.000387806129829117	F2/CXCL10/BAX/CXCL11	4
BP	GO:0006090	pyruvate metabolic process	6/137	118/18888	0.0508474576271186	7.01026846467896	5.59799228411172	0.000221042630079558	0.000873889467756392	0.000391950424897604	INSR/IFNG/PRKACA/HIF1A/GPI/TPI1	6
BP	GO:0007088	regulation of mitotic nuclear division	6/137	118/18888	0.0508474576271186	7.01026846467896	5.59799228411172	0.000221042630079558	0.000873889467756392	0.000391950424897604	TNF/INSR/IL1B/IL1A/EGF/CDC42	6
BP	GO:0042303	molting cycle	6/137	118/18888	0.0508474576271186	7.01026846467896	5.59799228411172	0.000221042630079558	0.000873889467756392	0.000391950424897604	TNF/EGFR/BCL2/RELA/PLA2G10/PTGS2	6
BP	GO:0042633	hair cycle	6/137	118/18888	0.0508474576271186	7.01026846467896	5.59799228411172	0.000221042630079558	0.000873889467756392	0.000391950424897604	TNF/EGFR/BCL2/RELA/PLA2G10/PTGS2	6
BP	GO:0050792	regulation of viral process	7/137	168/18888	0.0416666666666667	5.74452554744526	5.27988015664004	0.000226820947536234	0.000895828186734015	0.000401790216475668	TNF/CXCL8/STAT1/CCL5/BCL2/AXL/ISG20	7
BP	GO:0043500	muscle adaptation	6/137	119/18888	0.0504201680672269	6.95135864564804	5.56670994977035	0.000231408765530151	0.000912105114135979	0.000409090623273803	IL1B/PPARG/NOS3/PARP1/PRKCA/SCN5A	6
BP	GO:0051702	biological process involved in interaction with symbiont	6/137	119/18888	0.0504201680672269	6.95135864564804	5.56670994977035	0.000231408765530151	0.000912105114135979	0.000409090623273803	F2/CCL5/JUN/CTSG/TREM1/CDC42	6
BP	GO:0002679	respiratory burst involved in defense response	3/137	17/18888	0.176470588235294	24.3297552597681	8.22558402478323	0.00023563359928653	0.000924099672227012	0.000414470333538889	MPO/NCF1/S100A9	3
BP	GO:0070920	regulation of regulatory ncRNA processing	3/137	17/18888	0.176470588235294	24.3297552597681	8.22558402478323	0.00023563359928653	0.000924099672227012	0.000414470333538889	TP53/IL6/TGFB1	3
BP	GO:0090399	replicative senescence	3/137	17/18888	0.176470588235294	24.3297552597681	8.22558402478323	0.00023563359928653	0.000924099672227012	0.000414470333538889	TP53/MME/CDKN1A	3
BP	GO:1901550	regulation of endothelial cell development	3/137	17/18888	0.176470588235294	24.3297552597681	8.22558402478323	0.00023563359928653	0.000924099672227012	0.000414470333538889	TNF/IL1B/VEGFA	3
BP	GO:1903140	regulation of establishment of endothelial barrier	3/137	17/18888	0.176470588235294	24.3297552597681	8.22558402478323	0.00023563359928653	0.000924099672227012	0.000414470333538889	TNF/IL1B/VEGFA	3
BP	GO:0071364	cellular response to epidermal growth factor stimulus	4/137	42/18888	0.0952380952380952	13.1303441084463	6.72694271819292	0.000239402860044746	0.000937002184959916	0.0004202572728882	AKT1/EGFR/FOS/ERBB2	4
BP	GO:0095500	acetylcholine receptor signaling pathway	4/137	42/18888	0.0952380952380952	13.1303441084463	6.72694271819292	0.000239402860044746	0.000937002184959916	0.0004202572728882	CHRM1/CHRM3/CHRM2/PRKCB	4
BP	GO:0009185	ribonucleoside diphosphate metabolic process	6/137	120/18888	0.05	6.89343065693431	5.53578685884071	0.000242154031319696	0.000946326658092065	0.000424439416444038	INSR/IFNG/PRKACA/HIF1A/GPI/TPI1	6
BP	GO:0001937	negative regulation of endothelial cell proliferation	5/137	77/18888	0.0649350649350649	8.95250734666793	5.97685963541773	0.000242511332840984	0.000946326658092065	0.000424439416444038	TNF/PPARG/CCL2/STAT1/XDH	5
BP	GO:0045913	positive regulation of carbohydrate metabolic process	5/137	77/18888	0.0649350649350649	8.95250734666793	5.97685963541773	0.000242511332840984	0.000946326658092065	0.000424439416444038	INSR/AKT1/IFNG/PRKACA/EGF	5
BP	GO:0002698	negative regulation of immune effector process	6/137	121/18888	0.0495867768595041	6.83646015563733	5.50521570342747	0.000253288220050916	0.000987394756130691	0.000442858975289738	IL10/TNF/TGFB1/IL2/LGALS3/AXL	6
BP	GO:0000079	regulation of cyclin-dependent protein serine/threonine kinase activity	5/137	78/18888	0.0641025641025641	8.83773161145424	5.92888256428758	0.000257626411318073	0.00100131139985454	0.00044910076515215	PTEN/AKT1/EGFR/ADAM17/CDKN1A	5
BP	GO:0042509	regulation of tyrosine phosphorylation of STAT protein	5/137	78/18888	0.0641025641025641	8.83773161145424	5.92888256428758	0.000257626411318073	0.00100131139985454	0.00044910076515215	TNF/IL6/IFNG/IL2/CCL5	5
BP	GO:0046323	glucose import	5/137	78/18888	0.0641025641025641	8.83773161145424	5.92888256428758	0.000257626411318073	0.00100131139985454	0.00044910076515215	TNF/INSR/AKT1/ACE/MAPK14	5
BP	GO:0051651	maintenance of location in cell	8/137	228/18888	0.0350877192982456	4.83749519784864	4.98297841180717	0.00026227310697211	0.00101513410995445	0.000455300424601995	AKT1/F2/PRKACA/CXCL10/BAX/HSPA5/S100A9/CXCL11	8
BP	GO:0007595	lactation	4/137	43/18888	0.0930232558139535	12.824987268715	6.6353891080797	0.000262480968072621	0.00101513410995445	0.000455300424601995	VEGFA/VDR/HIF1A/XDH	4
BP	GO:0010518	positive regulation of phospholipase activity	4/137	43/18888	0.0930232558139535	12.824987268715	6.6353891080797	0.000262480968072621	0.00101513410995445	0.000455300424601995	EGFR/CCL5/SELE/ESR1	4
BP	GO:0045740	positive regulation of DNA replication	4/137	43/18888	0.0930232558139535	12.824987268715	6.6353891080797	0.000262480968072621	0.00101513410995445	0.000455300424601995	EGFR/CDK1/CDKN1A/CDC42	4
BP	GO:1904646	cellular response to amyloid-beta	4/137	43/18888	0.0930232558139535	12.824987268715	6.6353891080797	0.000262480968072621	0.00101513410995445	0.000455300424601995	TNF/ICAM1/VCAM1/PARP1	4
BP	GO:0045685	regulation of glial cell differentiation	5/137	79/18888	0.0632911392405063	8.72586159105608	5.88175828276925	0.000273446716785274	0.00105649867848856	0.000473852954196241	IL6/TGFB1/F2/RELA/CDK1	5
BP	GO:0030518	intracellular steroid hormone receptor signaling pathway	6/137	123/18888	0.0487804878048781	6.72529820188713	5.44510100227554	0.000276763216150945	0.00106825683627858	0.000479126635951031	NR3C1/MAPK1/NR3C2/PARP1/AR/ESR1	6
BP	GO:0010506	regulation of autophagy	10/137	357/18888	0.0280112044817927	3.86186591424891	4.66620182232698	0.000281219806098453	0.00107501016024334	0.000482155586745294	TP53/IL10/AKT1/IFNG/PRKACA/CASP3/BCL2/HIF1A/HSPB1/MAPK8	10
BP	GO:0001991	regulation of systemic arterial blood pressure by circulatory renin-angiotensin	3/137	18/18888	0.166666666666667	22.978102189781	7.97388646355436	0.000281262249086683	0.00107501016024334	0.000482155586745294	ACE/CTSG/REN	3
BP	GO:0009125	nucleoside monophosphate catabolic process	3/137	18/18888	0.166666666666667	22.978102189781	7.97388646355436	0.000281262249086683	0.00107501016024334	0.000482155586745294	XDH/PNP/HPRT1	3
BP	GO:0010544	negative regulation of platelet activation	3/137	18/18888	0.166666666666667	22.978102189781	7.97388646355436	0.000281262249086683	0.00107501016024334	0.000482155586745294	THBD/F2/NOS3	3
BP	GO:0019373	epoxygenase P450 pathway	3/137	18/18888	0.166666666666667	22.978102189781	7.97388646355436	0.000281262249086683	0.00107501016024334	0.000482155586745294	CYP1B1/CYP2C9/CYP1A1	3
BP	GO:0030730	sequestering of triglyceride	3/137	18/18888	0.166666666666667	22.978102189781	7.97388646355436	0.000281262249086683	0.00107501016024334	0.000482155586745294	TNF/IL1B/PPARG	3
BP	GO:0030949	positive regulation of vascular endothelial growth factor receptor signaling pathway	3/137	18/18888	0.166666666666667	22.978102189781	7.97388646355436	0.000281262249086683	0.00107501016024334	0.000482155586745294	IL1B/HIF1A/PRKCB	3
BP	GO:0046040	IMP metabolic process	3/137	18/18888	0.166666666666667	22.978102189781	7.97388646355436	0.000281262249086683	0.00107501016024334	0.000482155586745294	XDH/PNP/HPRT1	3
BP	GO:0051917	regulation of fibrinolysis	3/137	18/18888	0.166666666666667	22.978102189781	7.97388646355436	0.000281262249086683	0.00107501016024334	0.000482155586745294	THBD/F2/PLAT	3
BP	GO:0150078	positive regulation of neuroinflammatory response	3/137	18/18888	0.166666666666667	22.978102189781	7.97388646355436	0.000281262249086683	0.00107501016024334	0.000482155586745294	TNF/IL6/IL1B	3
BP	GO:0030890	positive regulation of B cell proliferation	4/137	44/18888	0.0909090909090909	12.5335102853351	6.54682684483975	0.000287114843064603	0.00109417060076277	0.000490749285467968	IL2/BCL2/MIF/CDKN1A	4
BP	GO:0042771	intrinsic apoptotic signaling pathway in response to DNA damage by p53 class mediator	4/137	44/18888	0.0909090909090909	12.5335102853351	6.54682684483975	0.000287114843064603	0.00109417060076277	0.000490749285467968	TP53/BCL2/MIF/CDKN1A	4
BP	GO:1905145	cellular response to acetylcholine	4/137	44/18888	0.0909090909090909	12.5335102853351	6.54682684483975	0.000287114843064603	0.00109417060076277	0.000490749285467968	CHRM1/CHRM3/CHRM2/PRKCB	4
BP	GO:0002286	T cell activation involved in immune response	6/137	124/18888	0.0483870967741935	6.67106192606546	5.41554385296249	0.00028912428678296	0.0010986160945786	0.000492743145394519	TP53/IL6/IFNG/ICAM1/IL2/LGALS3	6
BP	GO:0032479	regulation of type I interferon production	6/137	124/18888	0.0483870967741935	6.67106192606546	5.41554385296249	0.00028912428678296	0.0010986160945786	0.000492743145394519	IL10/STAT1/CHUK/IRF1/HSP90AA1/SYK	6
BP	GO:0032606	type I interferon production	6/137	124/18888	0.0483870967741935	6.67106192606546	5.41554385296249	0.00028912428678296	0.0010986160945786	0.000492743145394519	IL10/STAT1/CHUK/IRF1/HSP90AA1/SYK	6
BP	GO:0019722	calcium-mediated signaling	8/137	232/18888	0.0344827586206897	4.75409010823056	4.9177786295996	0.000294869138177173	0.00111935760220655	0.000502045972614379	CHRM3/TNF/CXCL8/PRKACA/SELP/SELE/VCAM1/SYK	8
BP	GO:0002768	immune response-regulating cell surface receptor signaling pathway	10/137	360/18888	0.0277777777777778	3.82968369829684	4.63344944704702	0.000300537056704291	0.00113976711126458	0.000511199894297156	MAPK1/CHUK/BCL2/BAX/NFKBIA/RELA/MAPK8/LGALS3/PRKCB/SYK	10
BP	GO:1904029	regulation of cyclin-dependent protein kinase activity	5/137	81/18888	0.0617283950617284	8.51040821843742	5.78996378271159	0.000307289588851371	0.00116424640737293	0.000522179166693578	PTEN/AKT1/EGFR/ADAM17/CDKN1A	5
BP	GO:0050806	positive regulation of synaptic transmission	7/137	177/18888	0.0395480225988701	5.45243102808363	5.08703693894476	0.000311728987512329	0.00117992288593728	0.000529210264630906	TNF/EGFR/MAPK1/CCL2/CA2/MME/PTGS2	7
BP	GO:0030574	collagen catabolic process	4/137	45/18888	0.0888888888888889	12.2549878345499	6.46109043085751	0.000313364610266042	0.00118153869444573	0.000529934975083211	MMP2/MMP9/CTSB/CTSS	4
BP	GO:0032881	regulation of polysaccharide metabolic process	4/137	45/18888	0.0888888888888889	12.2549878345499	6.46109043085751	0.000313364610266042	0.00118153869444573	0.000529934975083211	INSR/AKT1/TGFB1/EGF	4
BP	GO:0033574	response to testosterone	4/137	45/18888	0.0888888888888889	12.2549878345499	6.46109043085751	0.000313364610266042	0.00118153869444573	0.000529934975083211	SPP1/NCF1/GPI/AR	4
BP	GO:1900744	regulation of p38MAPK cascade	4/137	45/18888	0.0888888888888889	12.2549878345499	6.46109043085751	0.000313364610266042	0.00118153869444573	0.000529934975083211	IL1B/VEGFA/NCF1/XDH	4
BP	GO:0007260	tyrosine phosphorylation of STAT protein	5/137	82/18888	0.0609756097560976	8.40662275235891	5.74524418791966	0.000325356134742967	0.00122557079657515	0.000549683927068029	TNF/IL6/IFNG/IL2/CCL5	5
BP	GO:0009132	nucleoside diphosphate metabolic process	6/137	127/18888	0.047244094488189	6.51347778607966	5.32879550996051	0.000328826194068418	0.00123626001808415	0.000554478177447352	INSR/IFNG/PRKACA/HIF1A/GPI/TPI1	6
BP	GO:0031623	receptor internalization	6/137	127/18888	0.047244094488189	6.51347778607966	5.32879550996051	0.000328826194068418	0.00123626001808415	0.000554478177447352	INSR/VEGFA/CXCL8/EGF/SELE/SYK	6
BP	GO:0002281	macrophage activation involved in immune response	3/137	19/18888	0.157894736842105	21.7687283903189	7.74179775660307	0.00033222995870447	0.00124070595848565	0.000556472237673199	TNF/IFNG/SYK	3
BP	GO:0002523	leukocyte migration involved in inflammatory response	3/137	19/18888	0.157894736842105	21.7687283903189	7.74179775660307	0.00033222995870447	0.00124070595848565	0.000556472237673199	TNF/SELE/S100A9	3
BP	GO:0006144	purine nucleobase metabolic process	3/137	19/18888	0.157894736842105	21.7687283903189	7.74179775660307	0.00033222995870447	0.00124070595848565	0.000556472237673199	TTR/XDH/HPRT1	3
BP	GO:0030540	female genitalia development	3/137	19/18888	0.157894736842105	21.7687283903189	7.74179775660307	0.00033222995870447	0.00124070595848565	0.000556472237673199	BAX/AXL/ESR1	3
BP	GO:0060263	regulation of respiratory burst	3/137	19/18888	0.157894736842105	21.7687283903189	7.74179775660307	0.00033222995870447	0.00124070595848565	0.000556472237673199	INSR/NCF1/S100A9	3
BP	GO:0070242	thymocyte apoptotic process	3/137	19/18888	0.157894736842105	21.7687283903189	7.74179775660307	0.00033222995870447	0.00124070595848565	0.000556472237673199	TP53/BAX/HIF1A	3
BP	GO:1904044	response to aldosterone	3/137	19/18888	0.157894736842105	21.7687283903189	7.74179775660307	0.00033222995870447	0.00124070595848565	0.000556472237673199	ACE/PARP1/CDKN1A	3
BP	GO:0002701	negative regulation of production of molecular mediator of immune response	4/137	46/18888	0.0869565217391304	11.9885750555379	6.37802697703177	0.000341290847235752	0.00126969287601502	0.000569473235009026	IL10/TNF/TGFB1/AXL	4
BP	GO:0032892	positive regulation of organic acid transport	4/137	46/18888	0.0869565217391304	11.9885750555379	6.37802697703177	0.000341290847235752	0.00126969287601502	0.000569473235009026	IL1B/IL1A/MIF/PLA2G10	4
BP	GO:0045601	regulation of endothelial cell differentiation	4/137	46/18888	0.0869565217391304	11.9885750555379	6.37802697703177	0.000341290847235752	0.00126969287601502	0.000569473235009026	TNF/IL1B/VEGFA/XDH	4
BP	GO:1905144	response to acetylcholine	4/137	46/18888	0.0869565217391304	11.9885750555379	6.37802697703177	0.000341290847235752	0.00126969287601502	0.000569473235009026	CHRM1/CHRM3/CHRM2/PRKCB	4
BP	GO:0032371	regulation of sterol transport	5/137	83/18888	0.0602409638554217	8.30533814088471	5.70127850977147	0.000344215857359001	0.00127692979342855	0.000572719083551479	PPARG/EGF/PON1/NFKBIA/PLA2G10	5
BP	GO:0032374	regulation of cholesterol transport	5/137	83/18888	0.0602409638554217	8.30533814088471	5.70127850977147	0.000344215857359001	0.00127692979342855	0.000572719083551479	PPARG/EGF/PON1/NFKBIA/PLA2G10	5
BP	GO:0051279	regulation of release of sequestered calcium ion into cytosol	5/137	83/18888	0.0602409638554217	8.30533814088471	5.70127850977147	0.000344215857359001	0.00127692979342855	0.000572719083551479	F2/PRKACA/CXCL10/BAX/CXCL11	5
BP	GO:0046631	alpha-beta T cell activation	7/137	181/18888	0.0386740331491713	5.33193531475582	5.00551461987029	0.000356855741860847	0.00132256488215726	0.000593186995200968	IL6/IFNG/IL2/BCL2/IRF1/PNP/SYK	7
BP	GO:0019079	viral genome replication	6/137	129/18888	0.0465116279069767	6.41249363435749	5.27250461885517	0.000357582720379851	0.00132275159572868	0.000593270738587693	TNF/CXCL8/CCL2/CCL5/BCL2/ISG20	6
BP	GO:0098773	skin epidermis development	6/137	129/18888	0.0465116279069767	6.41249363435749	5.27250461885517	0.000357582720379851	0.00132275159572868	0.000593270738587693	TNF/EGFR/BCL2/CLDN4/RELA/PLA2G10	6
BP	GO:0006874	intracellular calcium ion homeostasis	9/137	302/18888	0.0298013245033113	4.10866727896747	4.6549423188122	0.00036365185076653	0.0013435462084076	0.000602597384091282	F2/PRKACA/CCL5/BCL2/VDR/CXCL10/BAX/CXCL11/PRKCB	9
BP	GO:0014855	striated muscle cell proliferation	5/137	84/18888	0.0595238095238095	8.20646506777894	5.65804457268509	0.000363891415525231	0.0013435462084076	0.000602597384091282	FOS/PIM1/CDK1/MAPK14/PPARD	5
BP	GO:0006775	fat-soluble vitamin metabolic process	4/137	47/18888	0.0851063829787234	11.7334989905265	6.2974949918626	0.00037095455066852	0.00136575545490952	0.000612558510668802	CYP3A4/TNF/IFNG/CYP1A1	4
BP	GO:0048806	genitalia development	4/137	47/18888	0.0851063829787234	11.7334989905265	6.2974949918626	0.00037095455066852	0.00136575545490952	0.000612558510668802	BAX/AXL/AR/ESR1	4
BP	GO:0060711	labyrinthine layer development	4/137	47/18888	0.0851063829787234	11.7334989905265	6.2974949918626	0.00037095455066852	0.00136575545490952	0.000612558510668802	IL10/AKT1/MAPK1/CASP8	4
BP	GO:0045931	positive regulation of mitotic cell cycle	6/137	130/18888	0.0461538461538462	6.36316676024705	5.24480406122418	0.000372680158005079	0.0013708178906866	0.00061482907682969	AKT1/EGFR/ADAM17/CYP1A1/CDK1/PRKCA	6
BP	GO:0045069	regulation of viral genome replication	5/137	85/18888	0.0588235294117647	8.10991841992271	5.61552111101629	0.000384405727543092	0.00141129238938356	0.000632982398899719	TNF/CXCL8/CCL5/BCL2/ISG20	5
BP	GO:2000134	negative regulation of G1/S transition of mitotic cell cycle	5/137	85/18888	0.0588235294117647	8.10991841992271	5.61552111101629	0.000384405727543092	0.00141129238938356	0.000632982398899719	TP53/PTEN/CCL2/BCL2/CDKN1A	5
BP	GO:0006309	apoptotic DNA fragmentation	3/137	20/18888	0.15	20.6802919708029	7.52684821248872	0.000388789334818094	0.00141938963505019	0.000636614115491616	IL6/BAX/APAF1	3
BP	GO:0034393	positive regulation of smooth muscle cell apoptotic process	3/137	20/18888	0.15	20.6802919708029	7.52684821248872	0.000388789334818094	0.00141938963505019	0.000636614115491616	IFNG/PPARG/SOD2	3
BP	GO:0038166	angiotensin-activated signaling pathway	3/137	20/18888	0.15	20.6802919708029	7.52684821248872	0.000388789334818094	0.00141938963505019	0.000636614115491616	ACE/CA2/PRKCA	3
BP	GO:0051546	keratinocyte migration	3/137	20/18888	0.15	20.6802919708029	7.52684821248872	0.000388789334818094	0.00141938963505019	0.000636614115491616	PTEN/MMP9/PPARD	3
BP	GO:0072567	chemokine (C-X-C motif) ligand 2 production	3/137	20/18888	0.15	20.6802919708029	7.52684821248872	0.000388789334818094	0.00141938963505019	0.000636614115491616	TNF/TGFB1/MIF	3
BP	GO:2000341	regulation of chemokine (C-X-C motif) ligand 2 production	3/137	20/18888	0.15	20.6802919708029	7.52684821248872	0.000388789334818094	0.00141938963505019	0.000636614115491616	TNF/TGFB1/MIF	3
BP	GO:0090287	regulation of cellular response to growth factor stimulus	10/137	373/18888	0.0268096514745308	3.6962094675251	4.49547662577119	0.000397577486572075	0.00145011937732912	0.000650396791662487	TP53/IL1B/PPARG/VEGFA/TGFB1/HSPA5/HIF1A/ADAM17/XDH/PRKCB	10
BP	GO:0002861	regulation of inflammatory response to antigenic stimulus	4/137	48/18888	0.0833333333333333	11.4890510948905	6.21936330982189	0.000402417103924659	0.00145689895957909	0.00065343751962815	IL10/TNF/MAPK14/SYK	4
BP	GO:0032620	interleukin-17 production	4/137	48/18888	0.0833333333333333	11.4890510948905	6.21936330982189	0.000402417103924659	0.00145689895957909	0.00065343751962815	IL6/IFNG/TGFB1/IL2	4
BP	GO:0032660	regulation of interleukin-17 production	4/137	48/18888	0.0833333333333333	11.4890510948905	6.21936330982189	0.000402417103924659	0.00145689895957909	0.00065343751962815	IL6/IFNG/TGFB1/IL2	4
BP	GO:0042311	vasodilation	4/137	48/18888	0.0833333333333333	11.4890510948905	6.21936330982189	0.000402417103924659	0.00145689895957909	0.00065343751962815	TNF/EGFR/NOS3/SOD2	4
BP	GO:0045776	negative regulation of blood pressure	4/137	48/18888	0.0833333333333333	11.4890510948905	6.21936330982189	0.000402417103924659	0.00145689895957909	0.00065343751962815	TNF/NOS3/NOS2/SOD2	4
BP	GO:0090279	regulation of calcium ion import	4/137	48/18888	0.0833333333333333	11.4890510948905	6.21936330982189	0.000402417103924659	0.00145689895957909	0.00065343751962815	ACE/CCL2/EGF/LGALS3	4
BP	GO:1902003	regulation of amyloid-beta formation	4/137	48/18888	0.0833333333333333	11.4890510948905	6.21936330982189	0.000402417103924659	0.00145689895957909	0.00065343751962815	TNF/IFNG/CASP3/RELA	4
BP	GO:1902041	regulation of extrinsic apoptotic signaling pathway via death domain receptors	4/137	48/18888	0.0833333333333333	11.4890510948905	6.21936330982189	0.000402417103924659	0.00145689895957909	0.00065343751962815	ICAM1/NOS3/BCL2L1/LGALS3	4
BP	GO:0032024	positive regulation of insulin secretion	5/137	86/18888	0.0581395348837209	8.01561704294687	5.57368772147722	0.00040578196654177	0.00146772200664045	0.000658291792452008	CHRM3/F2/PRKACA/HIF1A/PRKCB	5
BP	GO:0051302	regulation of cell division	7/137	186/18888	0.0376344086021505	5.18860372027313	4.90694597800705	0.000420473915732659	0.00151945749585462	0.000681495810497723	IL1B/VEGFA/TGFB1/IL1A/MYC/BCL2L1/CDC42	7
BP	GO:0045621	positive regulation of lymphocyte differentiation	6/137	133/18888	0.0451127819548872	6.21963668294825	5.16341601808631	0.000420983101448008	0.00151989282240232	0.000681691059933305	IL10/IFNG/IL2/AXL/PNP/SYK	6
BP	GO:0007179	transforming growth factor beta receptor signaling pathway	8/137	245/18888	0.0326530612244898	4.50183226575302	4.71574202757684	0.000424442855384474	0.00153097007800119	0.000686659348485661	TP53/PPARG/TGFB1/HSPA5/JUN/PARP1/FOS/ADAM17	8
BP	GO:0002312	B cell activation involved in immune response	5/137	87/18888	0.0574712643678161	7.92348351371759	5.53252481856502	0.000428043555774013	0.00154253484154506	0.000691846290487029	IL10/CD40LG/IL6/TGFB1/IL2	5
BP	GO:0046890	regulation of lipid biosynthetic process	7/137	187/18888	0.0374331550802139	5.16085717631445	4.88765736827712	0.000434222596409624	0.00156336128173262	0.000701187211028819	NR3C1/TNF/AKT1/IL1B/IFNG/IL1A/PTGS2	7
BP	GO:0030195	negative regulation of blood coagulation	4/137	49/18888	0.0816326530612245	11.2545806643825	6.14351014045325	0.000435740245255874	0.00156450354357251	0.000701699529840304	THBD/F2/NOS3/PLAT	4
BP	GO:0061028	establishment of endothelial barrier	4/137	49/18888	0.0816326530612245	11.2545806643825	6.14351014045325	0.000435740245255874	0.00156450354357251	0.000701699529840304	TNF/IL1B/VEGFA/ICAM1	4
BP	GO:0070266	necroptotic process	4/137	49/18888	0.0816326530612245	11.2545806643825	6.14351014045325	0.000435740245255874	0.00156450354357251	0.000701699529840304	TP53/TNF/CASP8/PARP1	4
BP	GO:0042770	signal transduction in response to DNA damage	7/137	188/18888	0.0372340425531915	5.13340580835533	4.86850615735535	0.000448328292307146	0.00160822350726692	0.000721308483808503	TP53/MIF/CASP9/CDK1/CDKN1A/E2F1/MAPK14	7
BP	GO:0015850	organic hydroxy compound transport	9/137	311/18888	0.0289389067524116	3.98976693970474	4.54421944805355	0.000450039682188654	0.00160824738440056	0.000721319193003456	PPARG/EGF/PON1/SPP1/NFKBIA/PLA2G10/PRKCB/REN/SYK	9
BP	GO:0032495	response to muramyl dipeptide	3/137	21/18888	0.142857142857143	19.6955161626694	7.32698393848034	0.000451186771519423	0.00160824738440056	0.000721319193003456	NFKBIA/RELA/MAPK14	3
BP	GO:0033033	negative regulation of myeloid cell apoptotic process	3/137	21/18888	0.142857142857143	19.6955161626694	7.32698393848034	0.000451186771519423	0.00160824738440056	0.000721319193003456	CCL5/BCL2/MIF	3
BP	GO:0046128	purine ribonucleoside metabolic process	3/137	21/18888	0.142857142857143	19.6955161626694	7.32698393848034	0.000451186771519423	0.00160824738440056	0.000721319193003456	XDH/PNP/HPRT1	3
BP	GO:0071605	monocyte chemotactic protein-1 production	3/137	21/18888	0.142857142857143	19.6955161626694	7.32698393848034	0.000451186771519423	0.00160824738440056	0.000721319193003456	IL1B/GSTP1/SYK	3
BP	GO:0071637	regulation of monocyte chemotactic protein-1 production	3/137	21/18888	0.142857142857143	19.6955161626694	7.32698393848034	0.000451186771519423	0.00160824738440056	0.000721319193003456	IL1B/GSTP1/SYK	3
BP	GO:0033627	cell adhesion mediated by integrin	5/137	88/18888	0.0568181818181818	7.83344392833444	5.49201359277765	0.000451214163858675	0.00160824738440056	0.000721319193003456	CYP1B1/ICAM1/CCL5/ADAM17/SYK	5
BP	GO:0030218	erythrocyte differentiation	6/137	135/18888	0.0444444444444444	6.12749391727494	5.11053324855395	0.000455808123743809	0.00162166493524867	0.000727337133429611	VEGFA/STAT1/CASP3/HIF1A/PLA2G10/MAPK14	6
BP	GO:0072175	epithelial tube formation	6/137	135/18888	0.0444444444444444	6.12749391727494	5.11053324855395	0.000455808123743809	0.00162166493524867	0.000727337133429611	TGFB1/PRKACA/CASP3/EGF/HIF1A/APAF1	6
BP	GO:0048863	stem cell differentiation	8/137	248/18888	0.032258064516129	4.44737461737697	4.67111890849833	0.000460104622526572	0.00163546279461718	0.000733525647013654	TP53/MAPK1/ACE/BCL2/HIF1A/ESR1/MAPK14/CDC42	8
BP	GO:0001818	negative regulation of cytokine production	10/137	381/18888	0.026246719160105	3.61859877004426	4.4136002112666	0.000469352437549966	0.0016648982564466	0.000746727822113351	IL10/TNF/IL6/IFNG/TGFB1/F2/CASP3/AXL/PLA2G10/GSTP1	10
BP	GO:0022602	ovulation cycle process	4/137	50/18888	0.08	11.0294890510949	6.06982222244242	0.000470986036716861	0.0016648982564466	0.000746727822113351	MMP2/NOS3/CASP3/ESR1	4
BP	GO:0043154	negative regulation of cysteine-type endopeptidase activity involved in apoptotic process	4/137	50/18888	0.08	11.0294890510949	6.06982222244242	0.000470986036716861	0.0016648982564466	0.000746727822113351	TNF/AKT1/VEGFA/MMP9	4
BP	GO:0043457	regulation of cellular respiration	4/137	50/18888	0.08	11.0294890510949	6.06982222244242	0.000470986036716861	0.0016648982564466	0.000746727822113351	TNF/IFNG/NOS2/HIF1A	4
BP	GO:0061082	myeloid leukocyte cytokine production	4/137	50/18888	0.08	11.0294890510949	6.06982222244242	0.000470986036716861	0.0016648982564466	0.000746727822113351	TGFB1/MIF/AXL/SYK	4
BP	GO:1900047	negative regulation of hemostasis	4/137	50/18888	0.08	11.0294890510949	6.06982222244242	0.000470986036716861	0.0016648982564466	0.000746727822113351	THBD/F2/NOS3/PLAT	4
BP	GO:0051146	striated muscle cell differentiation	9/137	313/18888	0.0287539936102236	3.96427322124018	4.52017808170506	0.000471366335009307	0.0016648982564466	0.000746727822113351	AKT1/VEGFA/TGFB1/CASP3/CHUK/BCL2/CXCL10/CDK1/MAPK14	9
BP	GO:0060047	heart contraction	8/137	249/18888	0.0321285140562249	4.42951367513851	4.65640197912425	0.000472518803707771	0.00166746256543085	0.000747877946966698	CHRM2/TNF/ACE/NOS3/PRKACA/HSP90AA1/CDC42/SCN5A	8
BP	GO:2000243	positive regulation of reproductive process	5/137	89/18888	0.0561797752808989	7.74542770442057	5.45213597141309	0.000475317699973005	0.00167582705761447	0.000751629526984981	INSR/VEGFA/BAX/PLA2G10/AR	5
BP	GO:0035270	endocrine system development	6/137	137/18888	0.0437956204379562	6.03804145132932	5.05870506731991	0.00049284057018121	0.00173604200847615	0.000778636690300518	NR3C1/CYP1B1/INSR/IL6/AKT1/MAPK1	6
BP	GO:0007422	peripheral nervous system development	5/137	90/18888	0.0555555555555556	7.65936739659367	5.41287458176522	0.000500378308997586	0.00175784293637067	0.000788414680843598	AKT1/MAPK1/RELA/CDK1/ERBB2	5
BP	GO:0032945	negative regulation of mononuclear cell proliferation	5/137	90/18888	0.0555555555555556	7.65936739659367	5.41287458176522	0.000500378308997586	0.00175784293637067	0.000788414680843598	IL10/CRP/IL2/CASP3/ERBB2	5
BP	GO:0046849	bone remodeling	5/137	90/18888	0.0555555555555556	7.65936739659367	5.41287458176522	0.000500378308997586	0.00175784293637067	0.000788414680843598	IL6/EGFR/SPP1/PRKCA/SYK	5
BP	GO:0006110	regulation of glycolytic process	4/137	51/18888	0.0784313725490196	10.813224559897	5.99819406922648	0.000508216833752152	0.00177982560388979	0.000798274183895651	INSR/IFNG/PRKACA/HIF1A	4
BP	GO:0030811	regulation of nucleotide catabolic process	4/137	51/18888	0.0784313725490196	10.813224559897	5.99819406922648	0.000508216833752152	0.00177982560388979	0.000798274183895651	INSR/IFNG/PRKACA/HIF1A	4
BP	GO:0033121	regulation of purine nucleotide catabolic process	4/137	51/18888	0.0784313725490196	10.813224559897	5.99819406922648	0.000508216833752152	0.00177982560388979	0.000798274183895651	INSR/IFNG/PRKACA/HIF1A	4
BP	GO:0071897	DNA biosynthetic process	7/137	192/18888	0.0364583333333333	5.0264598540146	4.79324021965605	0.000508456572773631	0.00177982560388979	0.000798274183895651	CYP1B1/TP53/TNF/MAPK1/MYC/HSP90AA1/CDKN1A	7
BP	GO:1904064	positive regulation of cation transmembrane transport	6/137	138/18888	0.0434782608695652	5.99428752776896	5.0331747087085	0.000512214399632074	0.00179137594146817	0.000803454655669932	IFNG/F2/CXCL10/BAX/CXCL11/CTSS	6
BP	GO:0019430	removal of superoxide radicals	3/137	22/18888	0.136363636363636	18.8002654280027	7.14048087878725	0.00051966254184591	0.00181256069457405	0.000812956284065248	NOS3/MPO/SOD2	3
BP	GO:0035584	calcium-mediated signaling using intracellular calcium source	3/137	22/18888	0.136363636363636	18.8002654280027	7.14048087878725	0.00051966254184591	0.00181256069457405	0.000812956284065248	PRKACA/SELP/VCAM1	3
BP	GO:0060444	branching involved in mammary gland duct morphogenesis	3/137	22/18888	0.136363636363636	18.8002654280027	7.14048087878725	0.00051966254184591	0.00181256069457405	0.000812956284065248	VDR/AR/ESR1	3
BP	GO:0010660	regulation of muscle cell apoptotic process	5/137	91/18888	0.0549450549450549	7.57519852410363	5.37421271654496	0.000526420366616751	0.00183449521699777	0.000822794193436071	TP53/IFNG/PPARG/SOD2/ESR1	5
BP	GO:0002377	immunoglobulin production	7/137	194/18888	0.0360824742268041	4.97464068026187	4.75638691660752	0.000540840737762408	0.00188306971028586	0.000844580465025235	IL10/TNF/CD40LG/IL6/TGFB1/IL2/GPI	7
BP	GO:0010517	regulation of phospholipase activity	4/137	52/18888	0.0769230769230769	10.6052779337451	5.92852729465605	0.000547495255447877	0.00190285017671218	0.000853452253170678	EGFR/CCL5/SELE/ESR1	4
BP	GO:0010823	negative regulation of mitochondrion organization	4/137	52/18888	0.0769230769230769	10.6052779337451	5.92852729465605	0.000547495255447877	0.00190285017671218	0.000853452253170678	TP53/AKT1/PPARG/BCL2L1	4
BP	GO:0032411	positive regulation of transporter activity	5/137	92/18888	0.0543478260869565	7.4928594097112	5.33613430136915	0.000553468474377292	0.00192190207354814	0.000861997268685209	ABCB1/IFNG/CCL2/PON1/CTSS	5
BP	GO:0001649	osteoblast differentiation	8/137	257/18888	0.0311284046692607	4.29162998097077	4.54139256809105	0.000581951752298453	0.00201901628348443	0.000905554214102856	TNF/IL6/AKT1/PPARG/PRKACA/SPP1/MAPK14/NR1I3	8
BP	GO:0002204	somatic recombination of immunoglobulin genes involved in immune response	4/137	53/18888	0.0754716981132075	10.4051783500895	5.86073000885597	0.000588884155438242	0.00202688120401719	0.000909081729948212	IL10/CD40LG/TGFB1/IL2	4
BP	GO:0002208	somatic diversification of immunoglobulins involved in immune response	4/137	53/18888	0.0754716981132075	10.4051783500895	5.86073000885597	0.000588884155438242	0.00202688120401719	0.000909081729948212	IL10/CD40LG/TGFB1/IL2	4
BP	GO:0007157	heterophilic cell-cell adhesion via plasma membrane cell adhesion molecules	4/137	53/18888	0.0754716981132075	10.4051783500895	5.86073000885597	0.000588884155438242	0.00202688120401719	0.000909081729948212	ICAM1/SELP/SELE/VCAM1	4
BP	GO:0038084	vascular endothelial growth factor signaling pathway	4/137	53/18888	0.0754716981132075	10.4051783500895	5.86073000885597	0.000588884155438242	0.00202688120401719	0.000909081729948212	VEGFA/XDH/HSPB1/RELA	4
BP	GO:0045190	isotype switching	4/137	53/18888	0.0754716981132075	10.4051783500895	5.86073000885597	0.000588884155438242	0.00202688120401719	0.000909081729948212	IL10/CD40LG/TGFB1/IL2	4
BP	GO:0046622	positive regulation of organ growth	4/137	53/18888	0.0754716981132075	10.4051783500895	5.86073000885597	0.000588884155438242	0.00202688120401719	0.000909081729948212	AKT1/PIM1/CDK1/MAPK14	4
BP	GO:0050819	negative regulation of coagulation	4/137	53/18888	0.0754716981132075	10.4051783500895	5.86073000885597	0.000588884155438242	0.00202688120401719	0.000909081729948212	THBD/F2/NOS3/PLAT	4
BP	GO:0060193	positive regulation of lipase activity	4/137	53/18888	0.0754716981132075	10.4051783500895	5.86073000885597	0.000588884155438242	0.00202688120401719	0.000909081729948212	EGFR/CCL5/SELE/ESR1	4
BP	GO:0060688	regulation of morphogenesis of a branching structure	4/137	53/18888	0.0754716981132075	10.4051783500895	5.86073000885597	0.000588884155438242	0.00202688120401719	0.000909081729948212	TNF/VEGFA/AR/ESR1	4
BP	GO:0010893	positive regulation of steroid biosynthetic process	3/137	23/18888	0.130434782608696	17.9828625833069	6.96587962989933	0.000594450888222	0.00204244549468192	0.000916062510200585	TNF/IFNG/IL1A	3
BP	GO:0098664	G protein-coupled serotonin receptor signaling pathway	3/137	23/18888	0.130434782608696	17.9828625833069	6.96587962989933	0.000594450888222	0.00204244549468192	0.000916062510200585	CHRM1/CHRM3/CHRM2	3
BP	GO:0001942	hair follicle development	5/137	94/18888	0.0531914893617021	7.33343686907905	5.26166650641108	0.000610682345903902	0.0020908651247673	0.000937779323694259	TNF/EGFR/BCL2/RELA/PLA2G10	5
BP	GO:0043502	regulation of muscle adaptation	5/137	94/18888	0.0531914893617021	7.33343686907905	5.26166650641108	0.000610682345903902	0.0020908651247673	0.000937779323694259	PPARG/NOS3/PARP1/PRKCA/SCN5A	5
BP	GO:0051781	positive regulation of cell division	5/137	94/18888	0.0531914893617021	7.33343686907905	5.26166650641108	0.000610682345903902	0.0020908651247673	0.000937779323694259	IL1B/VEGFA/TGFB1/IL1A/CDC42	5
BP	GO:1902807	negative regulation of cell cycle G1/S phase transition	5/137	94/18888	0.0531914893617021	7.33343686907905	5.26166650641108	0.000610682345903902	0.0020908651247673	0.000937779323694259	TP53/PTEN/CCL2/BCL2/CDKN1A	5
BP	GO:0003158	endothelium development	6/137	143/18888	0.041958041958042	5.78469705477005	4.90918387022989	0.000618149170565597	0.00211273011967787	0.000947586049100373	TNF/IL1B/VEGFA/ICAM1/CXCL10/XDH	6
BP	GO:1903900	regulation of viral life cycle	6/137	143/18888	0.041958041958042	5.78469705477005	4.90918387022989	0.000618149170565597	0.00211273011967787	0.000947586049100373	TNF/CXCL8/CCL5/BCL2/AXL/ISG20	6
BP	GO:0003015	heart process	8/137	260/18888	0.0307692307692308	4.24211117349804	4.4994664628218	0.000627928877090757	0.0021442811436025	0.000961737080425834	CHRM2/TNF/ACE/NOS3/PRKACA/HSP90AA1/CDC42/SCN5A	8
BP	GO:0055074	calcium ion homeostasis	9/137	326/18888	0.0276073619631902	3.80618870628275	4.36860567034584	0.000631202781739679	0.0021535801715551	0.000965907811498397	F2/PRKACA/CCL5/BCL2/VDR/CXCL10/BAX/CXCL11/PRKCB	9
BP	GO:0031279	regulation of cyclase activity	4/137	54/18888	0.0740740740740741	10.2124898621249	5.79471627580447	0.000632446593456663	0.00215406461708672	0.000966125091416469	NOS3/NOS2/MAPK8/MAPK14	4
BP	GO:0071385	cellular response to glucocorticoid stimulus	4/137	54/18888	0.0740740740740741	10.2124898621249	5.79471627580447	0.000632446593456663	0.00215406461708672	0.000966125091416469	NR3C1/CYP1B1/EGFR/CASP9	4
BP	GO:0014020	primary neural tube formation	5/137	95/18888	0.0526315789473684	7.25624279677295	5.22524787592932	0.000640898397074197	0.00217716136625553	0.00097648427411003	TGFB1/PRKACA/CASP3/HIF1A/APAF1	5
BP	GO:0060395	SMAD protein signal transduction	5/137	95/18888	0.0526315789473684	7.25624279677295	5.22524787592932	0.000640898397074197	0.00217716136625553	0.00097648427411003	PPARG/TGFB1/JUN/PARP1/FOS	5
BP	GO:0071229	cellular response to acid chemical	5/137	95/18888	0.0526315789473684	7.25624279677295	5.22524787592932	0.000640898397074197	0.00217716136625553	0.00097648427411003	TNF/EGFR/MMP2/VEGFA/BCL2L1	5
BP	GO:0001960	negative regulation of cytokine-mediated signaling pathway	5/137	96/18888	0.0520833333333333	7.18065693430657	5.18935414138683	0.000672221063062433	0.00227588306392965	0.00102076219800964	IL6/PPARG/CCL5/BIRC7/GSTP1	5
BP	GO:0042982	amyloid precursor protein metabolic process	5/137	96/18888	0.0520833333333333	7.18065693430657	5.18935414138683	0.000672221063062433	0.00227588306392965	0.00102076219800964	TNF/IFNG/CASP3/ADAM17/RELA	5
BP	GO:0006706	steroid catabolic process	3/137	24/18888	0.125	17.2335766423358	6.80193534627607	0.000675780111821568	0.00227588306392965	0.00102076219800964	CYP3A4/HSD11B1/SPP1	3
BP	GO:0034114	regulation of heterotypic cell-cell adhesion	3/137	24/18888	0.125	17.2335766423358	6.80193534627607	0.000675780111821568	0.00227588306392965	0.00102076219800964	IL10/TNF/IL1B	3
BP	GO:0060571	morphogenesis of an epithelial fold	3/137	24/18888	0.125	17.2335766423358	6.80193534627607	0.000675780111821568	0.00227588306392965	0.00102076219800964	EGFR/HIF1A/AR	3
BP	GO:0070233	negative regulation of T cell apoptotic process	3/137	24/18888	0.125	17.2335766423358	6.80193534627607	0.000675780111821568	0.00227588306392965	0.00102076219800964	CCL5/BCL2/HIF1A	3
BP	GO:0071450	cellular response to oxygen radical	3/137	24/18888	0.125	17.2335766423358	6.80193534627607	0.000675780111821568	0.00227588306392965	0.00102076219800964	NOS3/MPO/SOD2	3
BP	GO:0071451	cellular response to superoxide	3/137	24/18888	0.125	17.2335766423358	6.80193534627607	0.000675780111821568	0.00227588306392965	0.00102076219800964	NOS3/MPO/SOD2	3
BP	GO:0090200	positive regulation of release of cytochrome c from mitochondria	3/137	24/18888	0.125	17.2335766423358	6.80193534627607	0.000675780111821568	0.00227588306392965	0.00102076219800964	TP53/MMP9/BAX	3
BP	GO:0097066	response to thyroid hormone	3/137	24/18888	0.125	17.2335766423358	6.80193534627607	0.000675780111821568	0.00227588306392965	0.00102076219800964	ACE/CTSB/CTSS	3
BP	GO:1900087	positive regulation of G1/S transition of mitotic cell cycle	4/137	55/18888	0.0727272727272727	10.0268082282681	5.73040562531146	0.000678245807521605	0.00228025890576911	0.00102272481814816	AKT1/EGFR/ADAM17/CYP1A1	4
BP	GO:1902991	regulation of amyloid precursor protein catabolic process	4/137	55/18888	0.0727272727272727	10.0268082282681	5.73040562531146	0.000678245807521605	0.00228025890576911	0.00102272481814816	TNF/IFNG/CASP3/RELA	4
BP	GO:0022404	molting cycle process	5/137	97/18888	0.0515463917525773	7.10662954323124	5.15397196813136	0.000704675999335437	0.00236504992051636	0.0010607546554261	TNF/EGFR/BCL2/RELA/PLA2G10	5
BP	GO:0022405	hair cycle process	5/137	97/18888	0.0515463917525773	7.10662954323124	5.15397196813136	0.000704675999335437	0.00236504992051636	0.0010607546554261	TNF/EGFR/BCL2/RELA/PLA2G10	5
BP	GO:0009749	response to glucose	7/137	203/18888	0.0344827586206897	4.75409010823056	4.59658946476017	0.00070748933001494	0.00237245564353209	0.0010640762154057	ACE/ICAM1/PRKACA/CASP3/HIF1A/NCF1/PRKCB	7
BP	GO:0051783	regulation of nuclear division	6/137	147/18888	0.0408163265306122	5.62729033219127	4.81413864233176	0.000714531913263904	0.00239401866397761	0.00107374750146364	TNF/INSR/IL1B/IL1A/EGF/CDC42	6
BP	GO:0002429	immune response-activating cell surface receptor signaling pathway	9/137	332/18888	0.0271084337349398	3.73740216339812	4.30125334037787	0.000718656222769447	0.00240371756289866	0.00107809757969826	MAPK1/CHUK/BCL2/BAX/NFKBIA/RELA/LGALS3/PRKCB/SYK	9
BP	GO:0030198	extracellular matrix organization	9/137	332/18888	0.0271084337349398	3.73740216339812	4.30125334037787	0.000718656222769447	0.00240371756289866	0.00107809757969826	CYP1B1/TNF/IL6/MMP2/PPARG/TGFB1/MMP9/CTSG/CTSS	9
BP	GO:0007187	G protein-coupled receptor signaling pathway, coupled to cyclic nucleotide second messenger	4/137	56/18888	0.0714285714285714	9.84775808133472	5.66772261306038	0.000726345186747303	0.00242528580715795	0.00108777120870242	CHRM1/CHRM3/CHRM2/CCL2	4
BP	GO:0034205	amyloid-beta formation	4/137	56/18888	0.0714285714285714	9.84775808133472	5.66772261306038	0.000726345186747303	0.00242528580715795	0.00108777120870242	TNF/IFNG/CASP3/RELA	4
BP	GO:0043062	extracellular structure organization	9/137	333/18888	0.027027027027027	3.72618	4.29018005825835	0.00073415054730923	0.00244925651875349	0.0010985223745439	CYP1B1/TNF/IL6/MMP2/PPARG/TGFB1/MMP9/CTSG/CTSS	9
BP	GO:0014909	smooth muscle cell migration	5/137	98/18888	0.0510204081632653	7.03411291523909	5.11908849542745	0.000738289056846976	0.00245886730176463	0.00110283293168391	CYP1B1/ACE/CCL5/PLAT/BCL2	5
BP	GO:0048534	hematopoietic or lymphoid organ development	5/137	98/18888	0.0510204081632653	7.03411291523909	5.11908849542745	0.000738289056846976	0.00245886730176463	0.00110283293168391	TP53/MAPK1/TGFB1/BCL2/ADAM17	5
BP	GO:0045229	external encapsulating structure organization	9/137	334/18888	0.0269461077844311	3.71502250972508	4.27914939225612	0.000749916753356466	0.00249546766436067	0.00111924865495352	CYP1B1/TNF/IL6/MMP2/PPARG/TGFB1/MMP9/CTSG/CTSS	9
BP	GO:0003081	regulation of systemic arterial blood pressure by renin-angiotensin	3/137	25/18888	0.12	16.5442335766423	6.64757877333924	0.000763872660862733	0.00252899416085799	0.00113428571059077	ACE/CTSG/REN	3
BP	GO:0009110	vitamin biosynthetic process	3/137	25/18888	0.12	16.5442335766423	6.64757877333924	0.000763872660862733	0.00252899416085799	0.00113428571059077	CYP3A4/TNF/IFNG	3
BP	GO:0050927	positive regulation of positive chemotaxis	3/137	25/18888	0.12	16.5442335766423	6.64757877333924	0.000763872660862733	0.00252899416085799	0.00113428571059077	VEGFA/CXCL8/F3	3
BP	GO:0060964	regulation of miRNA-mediated gene silencing	3/137	25/18888	0.12	16.5442335766423	6.64757877333924	0.000763872660862733	0.00252899416085799	0.00113428571059077	TP53/IL6/TGFB1	3
BP	GO:0090335	regulation of brown fat cell differentiation	3/137	25/18888	0.12	16.5442335766423	6.64757877333924	0.000763872660862733	0.00252899416085799	0.00113428571059077	PIM1/MAPK14/PTGS2	3
BP	GO:2000353	positive regulation of endothelial cell apoptotic process	3/137	25/18888	0.12	16.5442335766423	6.64757877333924	0.000763872660862733	0.00252899416085799	0.00113428571059077	CD40LG/TGFB1/CCL2	3
BP	GO:0019217	regulation of fatty acid metabolic process	5/137	99/18888	0.0505050505050505	6.96306126963061	5.08469131494962	0.0007730862768774	0.00255517104191939	0.00114602637120412	AKT1/IL1B/PPARG/PPARD/PTGS2	5
BP	GO:1901992	positive regulation of mitotic cell cycle phase transition	5/137	99/18888	0.0505050505050505	6.96306126963061	5.08469131494962	0.0007730862768774	0.00255517104191939	0.00114602637120412	AKT1/EGFR/ADAM17/CYP1A1/CDK1	5
BP	GO:0019748	secondary metabolic process	4/137	57/18888	0.0701754385964912	9.67499039569727	5.60659642321505	0.000776808244769692	0.00256097827744477	0.00114863098942603	CYP3A4/CYP1B1/BCL2/CYP1A1	4
BP	GO:0046902	regulation of mitochondrial membrane permeability	4/137	57/18888	0.0701754385964912	9.67499039569727	5.60659642321505	0.000776808244769692	0.00256097827744477	0.00114863098942603	TP53/BCL2/BAX/BCL2L1	4
BP	GO:0060986	endocrine hormone secretion	4/137	57/18888	0.0701754385964912	9.67499039569727	5.60659642321505	0.000776808244769692	0.00256097827744477	0.00114863098942603	IL1B/PPARG/SPP1/REN	4
BP	GO:0003007	heart morphogenesis	8/137	269/18888	0.0297397769516729	4.10018	4.37738437820607	0.000783753870691593	0.0025795266282863	0.00115695015822452	TP53/INSR/VEGFA/TGFB1/NOS3/HIF1A/PIM1/CDC42	8
BP	GO:0034976	response to endoplasmic reticulum stress	8/137	269/18888	0.0297397769516729	4.10018	4.37738437820607	0.000783753870691593	0.0025795266282863	0.00115695015822452	TP53/CXCL8/BCL2/BAX/HSPA5/JUN/BCL2L1/APAF1	8
BP	GO:0002819	regulation of adaptive immune response	7/137	207/18888	0.0338164251207729	4.66222363270919	4.52855378525389	0.000793521293173136	0.00260716390520763	0.00116934582476132	IL10/TNF/IL6/IL1B/TGFB1/IL2/IRF1	7
BP	GO:0002705	positive regulation of leukocyte mediated immunity	6/137	150/18888	0.04	5.51474452554744	4.74511507531757	0.000794151460639972	0.00260716390520763	0.00116934582476132	TNF/IL6/IL1B/TGFB1/IL2/NOS2	6
BP	GO:0016331	morphogenesis of embryonic epithelium	6/137	150/18888	0.04	5.51474452554744	4.74511507531757	0.000794151460639972	0.00260716390520763	0.00116934582476132	TGFB1/PRKACA/CASP3/HIF1A/APAF1/AR	6
BP	GO:0030900	forebrain development	10/137	408/18888	0.0245098039215686	3.3791326749678	4.15266900682179	0.00079574921321167	0.00261021763729667	0.00117071546203695	PTEN/EGFR/CASP3/BAX/HIF1A/AXL/APAF1/E2F1/HPRT1/SCN5A	10
BP	GO:0006721	terpenoid metabolic process	5/137	100/18888	0.05	6.89343065693431	5.05076845045845	0.000809093885851658	0.00265176621431683	0.00118935052175309	CYP3A4/CYP1B1/CYP2C9/EGFR/CYP1A1	5
BP	GO:0015980	energy derivation by oxidation of organic compounds	9/137	338/18888	0.0266272189349112	3.67105774629638	4.23544676249086	0.000815772472964554	0.00266857761264893	0.00119689064549014	TP53/TNF/INSR/AKT1/IFNG/NOS2/HIF1A/SOD2/CDK1	9
BP	GO:0008016	regulation of heart contraction	7/137	208/18888	0.0336538461538462	4.63980909601348	4.51181614874169	0.000816270799163202	0.00266857761264893	0.00119689064549014	CHRM2/TNF/ACE/NOS3/PRKACA/HSP90AA1/SCN5A	7
BP	GO:0016064	immunoglobulin mediated immune response	7/137	208/18888	0.0336538461538462	4.63980909601348	4.51181614874169	0.000816270799163202	0.00266857761264893	0.00119689064549014	IL10/TNF/CD40LG/TGFB1/IL2/C1S/C1R	7
BP	GO:0002381	immunoglobulin production involved in immunoglobulin-mediated immune response	4/137	58/18888	0.0689655172413793	9.50818021646111	5.54696050880601	0.000829698593777978	0.00270794783111176	0.0012145486839769	IL10/CD40LG/TGFB1/IL2	4
BP	GO:0031638	zymogen activation	4/137	58/18888	0.0689655172413793	9.50818021646111	5.54696050880601	0.000829698593777978	0.00270794783111176	0.0012145486839769	THBD/CASP8/PLAT/C1R	4
BP	GO:0010906	regulation of glucose metabolic process	5/137	101/18888	0.0495049504950495	6.82517886825179	5.01730833858303	0.000846338290138071	0.00275765226203321	0.00123684174681581	NR3C1/TP53/INSR/AKT1/PRKACA	5
BP	GO:0060761	negative regulation of response to cytokine stimulus	5/137	101/18888	0.0495049504950495	6.82517886825179	5.01730833858303	0.000846338290138071	0.00275765226203321	0.00123684174681581	IL6/PPARG/CCL5/BIRC7/GSTP1	5
BP	GO:0016042	lipid catabolic process	9/137	340/18888	0.0264705882352941	3.64946328896522	4.21384326653183	0.000850426129846616	0.00276866458592862	0.00124178091268194	CYP3A4/CYP1B1/HSD11B1/TNF/AKT1/IL1B/SPP1/PLA2G10/PPARD	9
BP	GO:0033598	mammary gland epithelial cell proliferation	3/137	26/18888	0.115384615384615	15.9079169006176	6.50188559921884	0.000858945217846388	0.00278019520014849	0.0012469525382817	MAPK1/BAX/ESR1	3
BP	GO:0042278	purine nucleoside metabolic process	3/137	26/18888	0.115384615384615	15.9079169006176	6.50188559921884	0.000858945217846388	0.00278019520014849	0.0012469525382817	XDH/PNP/HPRT1	3
BP	GO:0045649	regulation of macrophage differentiation	3/137	26/18888	0.115384615384615	15.9079169006176	6.50188559921884	0.000858945217846388	0.00278019520014849	0.0012469525382817	TGFB1/CASP8/PRKCA	3
BP	GO:0050926	regulation of positive chemotaxis	3/137	26/18888	0.115384615384615	15.9079169006176	6.50188559921884	0.000858945217846388	0.00278019520014849	0.0012469525382817	VEGFA/CXCL8/F3	3
BP	GO:0060740	prostate gland epithelium morphogenesis	3/137	26/18888	0.115384615384615	15.9079169006176	6.50188559921884	0.000858945217846388	0.00278019520014849	0.0012469525382817	MMP2/AR/ESR1	3
BP	GO:1900368	regulation of post-transcriptional gene silencing by regulatory ncRNA	3/137	26/18888	0.115384615384615	15.9079169006176	6.50188559921884	0.000858945217846388	0.00278019520014849	0.0012469525382817	TP53/IL6/TGFB1	3
BP	GO:1900543	negative regulation of purine nucleotide metabolic process	3/137	26/18888	0.115384615384615	15.9079169006176	6.50188559921884	0.000858945217846388	0.00278019520014849	0.0012469525382817	TP53/PRKACA/PARP1	3
BP	GO:1901988	negative regulation of cell cycle phase transition	8/137	273/18888	0.0293040293040293	4.04010587952194	4.32482032491194	0.000862325960331479	0.00278882920173373	0.00125082499665861	TP53/PTEN/CCL2/BCL2/CDK1/CDKN1A/E2F1/MAPK14	8
BP	GO:0001841	neural tube formation	5/137	102/18888	0.0490196078431373	6.75826534993559	4.98429981063951	0.000884846070829954	0.00285693487774164	0.00128137124951341	TGFB1/PRKACA/CASP3/HIF1A/APAF1	5
BP	GO:0046620	regulation of organ growth	5/137	102/18888	0.0490196078431373	6.75826534993559	4.98429981063951	0.000884846070829954	0.00285693487774164	0.00128137124951341	PTEN/AKT1/PIM1/CDK1/MAPK14	5
BP	GO:0019724	B cell mediated immunity	7/137	212/18888	0.0330188679245283	4.55226552816417	4.44591316487661	0.000912477855002737	0.00294371981275636	0.00132029538512642	IL10/TNF/CD40LG/TGFB1/IL2/C1S/C1R	7
BP	GO:0001961	positive regulation of cytokine-mediated signaling pathway	4/137	60/18888	0.0666666666666667	9.19124087591241	5.43191273665308	0.000943015954628852	0.00303722601532027	0.00136223409382786	HIF1A/CASP1/ADAM17/AXL	4
BP	GO:0043030	regulation of macrophage activation	4/137	60/18888	0.0666666666666667	9.19124087591241	5.43191273665308	0.000943015954628852	0.00303722601532027	0.00136223409382786	IL10/IL6/MIF/PLA2G10	4
BP	GO:0000303	response to superoxide	3/137	27/18888	0.111111111111111	15.3187347931873	6.36405210423064	0.000961208785749529	0.00306802151206584	0.00137604626170459	NOS3/MPO/SOD2	3
BP	GO:0010758	regulation of macrophage chemotaxis	3/137	27/18888	0.111111111111111	15.3187347931873	6.36405210423064	0.000961208785749529	0.00306802151206584	0.00137604626170459	MAPK1/CCL5/MIF	3
BP	GO:0010875	positive regulation of cholesterol efflux	3/137	27/18888	0.111111111111111	15.3187347931873	6.36405210423064	0.000961208785749529	0.00306802151206584	0.00137604626170459	PPARG/PON1/NFKBIA	3
BP	GO:0032740	positive regulation of interleukin-17 production	3/137	27/18888	0.111111111111111	15.3187347931873	6.36405210423064	0.000961208785749529	0.00306802151206584	0.00137604626170459	IL6/TGFB1/IL2	3
BP	GO:0042730	fibrinolysis	3/137	27/18888	0.111111111111111	15.3187347931873	6.36405210423064	0.000961208785749529	0.00306802151206584	0.00137604626170459	THBD/F2/PLAT	3
BP	GO:0045940	positive regulation of steroid metabolic process	3/137	27/18888	0.111111111111111	15.3187347931873	6.36405210423064	0.000961208785749529	0.00306802151206584	0.00137604626170459	TNF/IFNG/IL1A	3
BP	GO:0045980	negative regulation of nucleotide metabolic process	3/137	27/18888	0.111111111111111	15.3187347931873	6.36405210423064	0.000961208785749529	0.00306802151206584	0.00137604626170459	TP53/PRKACA/PARP1	3
BP	GO:0048245	eosinophil chemotaxis	3/137	27/18888	0.111111111111111	15.3187347931873	6.36405210423064	0.000961208785749529	0.00306802151206584	0.00137604626170459	CCL2/CCL5/LGALS3	3
BP	GO:0060147	regulation of post-transcriptional gene silencing	3/137	27/18888	0.111111111111111	15.3187347931873	6.36405210423064	0.000961208785749529	0.00306802151206584	0.00137604626170459	TP53/IL6/TGFB1	3
BP	GO:0071480	cellular response to gamma radiation	3/137	27/18888	0.111111111111111	15.3187347931873	6.36405210423064	0.000961208785749529	0.00306802151206584	0.00137604626170459	TP53/BCL2L1/CDKN1A	3
BP	GO:0071549	cellular response to dexamethasone stimulus	3/137	27/18888	0.111111111111111	15.3187347931873	6.36405210423064	0.000961208785749529	0.00306802151206584	0.00137604626170459	NR3C1/EGFR/CASP9	3
BP	GO:0007043	cell-cell junction assembly	6/137	156/18888	0.0384615384615385	5.30263896687254	4.61248203385984	0.000973824917308472	0.00309817365880889	0.00138956987900811	TNF/IL1B/ACE/PRKACA/CLDN4/PRKCA	6
BP	GO:0007272	ensheathment of neurons	6/137	156/18888	0.0384615384615385	5.30263896687254	4.61248203385984	0.000973824917308472	0.00309817365880889	0.00138956987900811	PTEN/TNF/AKT1/MAPK1/ERBB2/PPARD	6
BP	GO:0008366	axon ensheathment	6/137	156/18888	0.0384615384615385	5.30263896687254	4.61248203385984	0.000973824917308472	0.00309817365880889	0.00138956987900811	PTEN/TNF/AKT1/MAPK1/ERBB2/PPARD	6
BP	GO:0046718	symbiont entry into host cell	6/137	156/18888	0.0384615384615385	5.30263896687254	4.61248203385984	0.000973824917308472	0.00309817365880889	0.00138956987900811	INSR/EGFR/ICAM1/CTSB/AXL/CDK1	6
BP	GO:0016447	somatic recombination of immunoglobulin gene segments	4/137	61/18888	0.0655737704918033	9.04056479597942	5.37638634179089	0.00100357045819126	0.00319021178172993	0.00143085013551274	IL10/CD40LG/TGFB1/IL2	4
BP	GO:1901222	regulation of non-canonical NF-kappaB signal transduction	5/137	105/18888	0.0476190476190476	6.56517205422315	4.8878776087515	0.0010082179931599	0.00320238209037791	0.00143630867211458	TNF/EGFR/IL1B/NR3C2/RELA	5
BP	GO:0097306	cellular response to alcohol	5/137	106/18888	0.0471698113207547	6.50323646880595	4.85657103977328	0.00105204840148686	0.00333888737809548	0.00149753301168584	CYP1B1/AKT1/ACE/FOS/SOD2	5
BP	GO:0002712	regulation of B cell mediated immunity	4/137	62/18888	0.0645161290322581	8.89474923475394	5.32212063346301	0.00106680718833243	0.00336583352343374	0.00150961869700918	IL10/TNF/TGFB1/IL2	4
BP	GO:0002889	regulation of immunoglobulin mediated immune response	4/137	62/18888	0.0645161290322581	8.89474923475394	5.32212063346301	0.00106680718833243	0.00336583352343374	0.00150961869700918	IL10/TNF/TGFB1/IL2	4
BP	GO:0034113	heterotypic cell-cell adhesion	4/137	62/18888	0.0645161290322581	8.89474923475394	5.32212063346301	0.00106680718833243	0.00336583352343374	0.00150961869700918	IL10/TNF/IL1B/VCAM1	4
BP	GO:0000305	response to oxygen radical	3/137	28/18888	0.107142857142857	14.7716371220021	6.23337563330658	0.00107086877318454	0.00336583352343374	0.00150961869700918	NOS3/MPO/SOD2	3
BP	GO:0010039	response to iron ion	3/137	28/18888	0.107142857142857	14.7716371220021	6.23337563330658	0.00107086877318454	0.00336583352343374	0.00150961869700918	BCL2/HIF1A/CYP1A1	3
BP	GO:0030325	adrenal gland development	3/137	28/18888	0.107142857142857	14.7716371220021	6.23337563330658	0.00107086877318454	0.00336583352343374	0.00150961869700918	NR3C1/CYP1B1/INSR	3
BP	GO:0032104	regulation of response to extracellular stimulus	3/137	28/18888	0.107142857142857	14.7716371220021	6.23337563330658	0.00107086877318454	0.00336583352343374	0.00150961869700918	BCL2/VDR/BAX	3
BP	GO:0032107	regulation of response to nutrient levels	3/137	28/18888	0.107142857142857	14.7716371220021	6.23337563330658	0.00107086877318454	0.00336583352343374	0.00150961869700918	BCL2/VDR/BAX	3
BP	GO:0050995	negative regulation of lipid catabolic process	3/137	28/18888	0.107142857142857	14.7716371220021	6.23337563330658	0.00107086877318454	0.00336583352343374	0.00150961869700918	TNF/AKT1/IL1B	3
BP	GO:0051873	killing by host of symbiont cells	3/137	28/18888	0.107142857142857	14.7716371220021	6.23337563330658	0.00107086877318454	0.00336583352343374	0.00150961869700918	F2/CTSG/TREM1	3
BP	GO:0060512	prostate gland morphogenesis	3/137	28/18888	0.107142857142857	14.7716371220021	6.23337563330658	0.00107086877318454	0.00336583352343374	0.00150961869700918	MMP2/AR/ESR1	3
BP	GO:0060966	regulation of gene silencing by regulatory ncRNA	3/137	28/18888	0.107142857142857	14.7716371220021	6.23337563330658	0.00107086877318454	0.00336583352343374	0.00150961869700918	TP53/IL6/TGFB1	3
BP	GO:2000117	negative regulation of cysteine-type endopeptidase activity	4/137	63/18888	0.0634920634920635	8.7535627389642	5.26906607223546	0.00113278988102464	0.00355759713639064	0.0015956270909212	TNF/AKT1/VEGFA/MMP9	4
BP	GO:0042692	muscle cell differentiation	10/137	428/18888	0.0233644859813084	3.22122927894126	3.97309530118679	0.00114272411977082	0.00358395642532475	0.00160744956376122	AKT1/VEGFA/TGFB1/CASP3/CHUK/BCL2/CXCL10/SOD2/CDK1/MAPK14	10
BP	GO:0140888	interferon-mediated signaling pathway	5/137	108/18888	0.0462962962962963	6.38280616382806	4.79515203716022	0.00114393289483511	0.00358395642532475	0.00160744956376122	TP53/IFNG/PPARG/STAT1/IRF1	5
BP	GO:1901796	regulation of signal transduction by p53 class mediator	5/137	108/18888	0.0462962962962963	6.38280616382806	4.79515203716022	0.00114393289483511	0.00358395642532475	0.00160744956376122	TP53/AKT1/BCL2/MYC/MIF	5
BP	GO:0071322	cellular response to carbohydrate stimulus	6/137	161/18888	0.0372670807453416	5.13796073808768	4.50707469130611	0.0011461604047307	0.00358806019415294	0.00160929015572992	ACE/ICAM1/PRKACA/HIF1A/NCF1/PRKCB	6
BP	GO:0032412	regulation of monoatomic ion transmembrane transporter activity	7/137	221/18888	0.0316742081447964	4.36687914918915	4.30344203891737	0.00116170830851601	0.00363382358903807	0.00162981561430541	CHRM3/ABCB1/IFNG/CCL2/PRKACA/MMP9/CTSS	7
BP	GO:1990778	protein localization to cell periphery	9/137	356/18888	0.0252808988764045	3.48544246698926	4.0466638021406	0.00117311499303067	0.00366657044184645	0.00164450298993571	TNF/AKT1/EGFR/IFNG/TGFB1/BCL2L1/LGALS3/AR/ERBB2	9
BP	GO:0045672	positive regulation of osteoclast differentiation	3/137	29/18888	0.103448275862069	14.2622703246917	6.1092388013144	0.00118812507853536	0.00370755710859798	0.00166288602582427	TNF/IFNG/FOS	3
BP	GO:0045742	positive regulation of epidermal growth factor receptor signaling pathway	3/137	29/18888	0.103448275862069	14.2622703246917	6.1092388013144	0.00118812507853536	0.00370755710859798	0.00166288602582427	TGFB1/MMP9/ADAM17	3
BP	GO:0001885	endothelial cell development	4/137	64/18888	0.0625	8.61678832116788	5.21717582229128	0.00120158222718098	0.00374656021393749	0.0016803794094548	TNF/IL1B/VEGFA/ICAM1	4
BP	GO:0031330	negative regulation of cellular catabolic process	7/137	224/18888	0.03125	4.30839416058394	4.25763520943132	0.00125569856962401	0.00391217642010348	0.00175466036233474	TP53/IL10/AKT1/PRKACA/BCL2/E2F1/MAPK14	7
BP	GO:0002931	response to ischemia	4/137	65/18888	0.0615384615384615	8.48422234699607	5.16640556415496	0.00127324785066871	0.0039605402514834	0.00177635214940674	TP53/BCL2/RELA/CASP9	4
BP	GO:0042058	regulation of epidermal growth factor receptor signaling pathway	4/137	65/18888	0.0615384615384615	8.48422234699607	5.16640556415496	0.00127324785066871	0.0039605402514834	0.00177635214940674	EGFR/TGFB1/MMP9/ADAM17	4
BP	GO:0014812	muscle cell migration	5/137	111/18888	0.045045045045045	6.2103	4.70587619245813	0.00129273365079349	0.00401476455488684	0.00180067243194009	CYP1B1/ACE/CCL5/PLAT/BCL2	5
BP	GO:0045445	myoblast differentiation	5/137	111/18888	0.045045045045045	6.2103	4.70587619245813	0.00129273365079349	0.00401476455488684	0.00180067243194009	TNF/TGFB1/CXCL10/MAPK14/PPARD	5
BP	GO:0008209	androgen metabolic process	3/137	30/18888	0.1	13.7868613138686	5.99109661598534	0.0013131721730813	0.00405889580770582	0.00182046585425707	CYP3A4/SPP1/ESR1	3
BP	GO:0032607	interferon-alpha production	3/137	30/18888	0.1	13.7868613138686	5.99109661598534	0.0013131721730813	0.00405889580770582	0.00182046585425707	IL10/STAT1/CHUK	3
BP	GO:0032647	regulation of interferon-alpha production	3/137	30/18888	0.1	13.7868613138686	5.99109661598534	0.0013131721730813	0.00405889580770582	0.00182046585425707	IL10/STAT1/CHUK	3
BP	GO:0070168	negative regulation of biomineral tissue development	3/137	30/18888	0.1	13.7868613138686	5.99109661598534	0.0013131721730813	0.00405889580770582	0.00182046585425707	TGFB1/NOS3/HIF1A	3
BP	GO:1900017	positive regulation of cytokine production involved in inflammatory response	3/137	30/18888	0.1	13.7868613138686	5.99109661598534	0.0013131721730813	0.00405889580770582	0.00182046585425707	TNF/IL6/HIF1A	3
BP	GO:1902230	negative regulation of intrinsic apoptotic signaling pathway in response to DNA damage	3/137	30/18888	0.1	13.7868613138686	5.99109661598534	0.0013131721730813	0.00405889580770582	0.00182046585425707	BCL2/MIF/BCL2L1	3
BP	GO:0000271	polysaccharide biosynthetic process	4/137	66/18888	0.0606060606060606	8.35567352355674	5.11671332304982	0.00134785028685613	0.0041595064101085	0.00186559097570084	INSR/AKT1/TGFB1/EGF	4
BP	GO:0016445	somatic diversification of immunoglobulins	4/137	66/18888	0.0606060606060606	8.35567352355674	5.11671332304982	0.00134785028685613	0.0041595064101085	0.00186559097570084	IL10/CD40LG/TGFB1/IL2	4
BP	GO:0072659	protein localization to plasma membrane	8/137	293/18888	0.0273037542662116	3.76433073416208	4.07619806019384	0.00135554304515453	0.00417994740264527	0.00187475901812008	TNF/AKT1/EGFR/IFNG/TGFB1/BCL2L1/LGALS3/AR	8
BP	GO:0006937	regulation of muscle contraction	6/137	167/18888	0.0359281437125748	4.9533633463001	4.3862158723952	0.00138280259696359	0.00426064472350483	0.00191095278216692	CHRM3/CHRM2/PRKACA/HSP90AA1/PTGS2/SCN5A	6
BP	GO:0018958	phenol-containing compound metabolic process	5/137	113/18888	0.0442477876106195	6.10038111233124	4.64816391202534	0.00139957582678448	0.00430554011229528	0.00193108892908438	ALDH2/BCL2/CTSB/DUOX2/HPRT1	5
BP	GO:0035249	synaptic transmission, glutamatergic	5/137	113/18888	0.0442477876106195	6.10038111233124	4.64816391202534	0.00139957582678448	0.00430554011229528	0.00193108892908438	NR3C1/TNF/EGFR/CCL2/PTGS2	5
BP	GO:0009620	response to fungus	4/137	67/18888	0.0597014925373134	8.23096197842902	5.06805931136832	0.00142545296168435	0.00437532293769134	0.00196238740454806	MPO/S100A9/CTSG/SYK	4
BP	GO:0060760	positive regulation of response to cytokine stimulus	4/137	67/18888	0.0597014925373134	8.23096197842902	5.06805931136832	0.00142545296168435	0.00437532293769134	0.00196238740454806	HIF1A/CASP1/ADAM17/AXL	4
BP	GO:1903169	regulation of calcium ion transmembrane transport	6/137	168/18888	0.0357142857142857	4.92387904066736	4.3666349515245	0.00142561673212756	0.00437532293769134	0.00196238740454806	F2/PRKACA/BCL2/CXCL10/BAX/CXCL11	6
BP	GO:0002313	mature B cell differentiation involved in immune response	3/137	31/18888	0.0967741935483871	13.3421238521309	5.8784659019898	0.00144619918311937	0.00440392430373578	0.00197521547719042	IL10/IL6/IL2	3
BP	GO:0030262	apoptotic nuclear changes	3/137	31/18888	0.0967741935483871	13.3421238521309	5.8784659019898	0.00144619918311937	0.00440392430373578	0.00197521547719042	IL6/BAX/APAF1	3
BP	GO:0030808	regulation of nucleotide biosynthetic process	3/137	31/18888	0.0967741935483871	13.3421238521309	5.8784659019898	0.00144619918311937	0.00440392430373578	0.00197521547719042	NOS3/NOS2/PARP1	3
BP	GO:0032682	negative regulation of chemokine production	3/137	31/18888	0.0967741935483871	13.3421238521309	5.8784659019898	0.00144619918311937	0.00440392430373578	0.00197521547719042	IL10/IL6/GSTP1	3
BP	GO:0045745	positive regulation of G protein-coupled receptor signaling pathway	3/137	31/18888	0.0967741935483871	13.3421238521309	5.8784659019898	0.00144619918311937	0.00440392430373578	0.00197521547719042	F2/HIF1A/PRKCA	3
BP	GO:0060045	positive regulation of cardiac muscle cell proliferation	3/137	31/18888	0.0967741935483871	13.3421238521309	5.8784659019898	0.00144619918311937	0.00440392430373578	0.00197521547719042	PIM1/CDK1/MAPK14	3
BP	GO:0072677	eosinophil migration	3/137	31/18888	0.0967741935483871	13.3421238521309	5.8784659019898	0.00144619918311937	0.00440392430373578	0.00197521547719042	CCL2/CCL5/LGALS3	3
BP	GO:1900371	regulation of purine nucleotide biosynthetic process	3/137	31/18888	0.0967741935483871	13.3421238521309	5.8784659019898	0.00144619918311937	0.00440392430373578	0.00197521547719042	NOS3/NOS2/PARP1	3
BP	GO:1901186	positive regulation of ERBB signaling pathway	3/137	31/18888	0.0967741935483871	13.3421238521309	5.8784659019898	0.00144619918311937	0.00440392430373578	0.00197521547719042	TGFB1/MMP9/ADAM17	3
BP	GO:1902042	negative regulation of extrinsic apoptotic signaling pathway via death domain receptors	3/137	31/18888	0.0967741935483871	13.3421238521309	5.8784659019898	0.00144619918311937	0.00440392430373578	0.00197521547719042	ICAM1/NOS3/BCL2L1	3
BP	GO:0042752	regulation of circadian rhythm	5/137	114/18888	0.043859649122807	6.04686899731079	4.61982588119705	0.00145537387754943	0.00442841389978075	0.00198619936923805	TP53/PPARG/PARP1/MAPK8/CDK1	5
BP	GO:0051926	negative regulation of calcium ion transport	4/137	68/18888	0.0588235294117647	8.10991841992271	5.02040578390317	0.00150611917125553	0.00457570004631633	0.00205225905967506	ACE/NOS3/BCL2/PTGS2	4
BP	GO:1902808	positive regulation of cell cycle G1/S phase transition	4/137	68/18888	0.0588235294117647	8.10991841992271	5.02040578390317	0.00150611917125553	0.00457570004631633	0.00205225905967506	AKT1/EGFR/ADAM17/CYP1A1	4
BP	GO:0046634	regulation of alpha-beta T cell activation	5/137	115/18888	0.0434782608695652	5.99428752776896	4.59182341781895	0.00151279436618897	0.00458529145100689	0.00205656092539439	IFNG/IL2/IRF1/PNP/SYK	5
BP	GO:0048259	regulation of receptor-mediated endocytosis	5/137	115/18888	0.0434782608695652	5.99428752776896	4.59182341781895	0.00151279436618897	0.00458529145100689	0.00205656092539439	INSR/VEGFA/EGF/SELE/SYK	5
BP	GO:0051099	positive regulation of binding	5/137	115/18888	0.0434782608695652	5.99428752776896	4.59182341781895	0.00151279436618897	0.00458529145100689	0.00205656092539439	IFNG/PPARG/MMP9/EGF/PON1	5
BP	GO:0042391	regulation of membrane potential	10/137	446/18888	0.0224215246636771	3.09122450983601	3.82026630237225	0.00155275189536979	0.00470275748326559	0.00210924591926786	CHRM1/PTEN/TNF/AKT1/BCL2/BAX/PARP1/SOD2/BCL2L1/SCN5A	10
BP	GO:0046685	response to arsenic-containing substance	3/137	32/18888	0.09375	12.9251824817518	5.77091655529325	0.00158738997109571	0.00480394333357914	0.00215462904663961	CYP1B1/CYP1A1/CDKN1A	3
BP	GO:0060191	regulation of lipase activity	4/137	69/18888	0.0579710144927536	7.99238337035862	4.97371690463457	0.00158991206192949	0.00480785472710309	0.00215638335586317	EGFR/CCL5/SELE/ESR1	4
BP	GO:0007006	mitochondrial membrane organization	5/137	117/18888	0.0427350427350427	5.89182107430283	4.53679699413585	0.00163261665114168	0.00492936764939303	0.00221088343084905	TP53/BCL2/BAX/HSP90AA1/BCL2L1	5
BP	GO:1901989	positive regulation of cell cycle phase transition	5/137	117/18888	0.0427350427350427	5.89182107430283	4.53679699413585	0.00163261665114168	0.00492936764939303	0.00221088343084905	AKT1/EGFR/ADAM17/CYP1A1/CDK1	5
BP	GO:0016241	regulation of macroautophagy	6/137	173/18888	0.0346820809248555	4.78157039787351	4.27100305742502	0.00165506468772606	0.00499328929707477	0.00223955309434017	TP53/AKT1/PRKACA/CASP3/HIF1A/MAPK8	6
BP	GO:0002562	somatic diversification of immune receptors via germline recombination within a single locus	4/137	70/18888	0.0571428571428571	7.87820646506778	4.9279586239983	0.00167689461092028	0.00504358302207563	0.00226211046299044	IL10/CD40LG/TGFB1/IL2	4
BP	GO:0016444	somatic cell DNA recombination	4/137	70/18888	0.0571428571428571	7.87820646506778	4.9279586239983	0.00167689461092028	0.00504358302207563	0.00226211046299044	IL10/CD40LG/TGFB1/IL2	4
BP	GO:0046626	regulation of insulin receptor signaling pathway	4/137	70/18888	0.0571428571428571	7.87820646506778	4.9279586239983	0.00167689461092028	0.00504358302207563	0.00226211046299044	IL1B/RELA/CTSD/PRKCB	4
BP	GO:0071479	cellular response to ionizing radiation	4/137	70/18888	0.0571428571428571	7.87820646506778	4.9279586239983	0.00167689461092028	0.00504358302207563	0.00226211046299044	TP53/BCL2L1/CDKN1A/MAPK14	4
BP	GO:0009308	amine metabolic process	5/137	118/18888	0.0423728813559322	5.84189038723246	4.50975945376341	0.00169507567862231	0.00509434735081723	0.00228487890334137	ALDH2/VCAM1/CYP1A1/ODC1/HPRT1	5
BP	GO:0002862	negative regulation of inflammatory response to antigenic stimulus	3/137	33/18888	0.0909090909090909	12.5335102853351	5.66806426473036	0.00173692321575662	0.00519615131875163	0.00233053926424558	IL10/MAPK14/SYK	3
BP	GO:0006921	cellular component disassembly involved in execution phase of apoptosis	3/137	33/18888	0.0909090909090909	12.5335102853351	5.66806426473036	0.00173692321575662	0.00519615131875163	0.00233053926424558	IL6/BAX/APAF1	3
BP	GO:0034121	regulation of toll-like receptor signaling pathway	3/137	33/18888	0.0909090909090909	12.5335102853351	5.66806426473036	0.00173692321575662	0.00519615131875163	0.00233053926424558	IRF1/S100A9/ESR1	3
BP	GO:0045648	positive regulation of erythrocyte differentiation	3/137	33/18888	0.0909090909090909	12.5335102853351	5.66806426473036	0.00173692321575662	0.00519615131875163	0.00233053926424558	STAT1/HIF1A/MAPK14	3
BP	GO:0045907	positive regulation of vasoconstriction	3/137	33/18888	0.0909090909090909	12.5335102853351	5.66806426473036	0.00173692321575662	0.00519615131875163	0.00233053926424558	EGFR/ACE/PTGS2	3
BP	GO:0051973	positive regulation of telomerase activity	3/137	33/18888	0.0909090909090909	12.5335102853351	5.66806426473036	0.00173692321575662	0.00519615131875163	0.00233053926424558	MAPK1/MYC/HSP90AA1	3
BP	GO:0034329	cell junction assembly	10/137	453/18888	0.022075055187638	3.04345724367961	3.76289969715461	0.00174145034473606	0.00520571165742966	0.00233482719646731	PTEN/TNF/IL1B/VEGFA/ACE/PRKACA/BCL2/CLDN4/PRKCA/CDC42	10
BP	GO:0032609	type II interferon production	5/137	119/18888	0.0420168067226891	5.79279887137337	4.4830303050266	0.00175927159586319	0.00525095567925578	0.00235511970968909	IL10/TNF/IL1B/IL2/AXL	5
BP	GO:0032649	regulation of type II interferon production	5/137	119/18888	0.0420168067226891	5.79279887137337	4.4830303050266	0.00175927159586319	0.00525095567925578	0.00235511970968909	IL10/TNF/IL1B/IL2/AXL	5
BP	GO:0090559	regulation of membrane permeability	4/137	71/18888	0.0563380281690141	7.76724581063021	4.88309856567312	0.00176712960738486	0.00527038654834081	0.002363834699027	TP53/BCL2/BAX/BCL2L1	4
BP	GO:0010822	positive regulation of mitochondrion organization	4/137	72/18888	0.0555555555555556	7.65936739659367	4.83910592202658	0.00186067963399568	0.00554094239826589	0.00248518240288356	TP53/MMP9/BAX/HIF1A	4
BP	GO:1901184	regulation of ERBB signaling pathway	4/137	72/18888	0.0555555555555556	7.65936739659367	4.83910592202658	0.00186067963399568	0.00554094239826589	0.00248518240288356	EGFR/TGFB1/MMP9/ADAM17	4
BP	GO:0030336	negative regulation of cell migration	9/137	381/18888	0.0236220472440945	3.25673889303983	3.80369202377874	0.00186966485159284	0.00556346238183257	0.0024952828989455	CYP1B1/PTEN/TNF/AKT1/PPARG/TGFB1/CCL2/BCL2/MIF	9
BP	GO:0002360	T cell lineage commitment	3/137	34/18888	0.0882352941176471	12.1648776298841	5.56956441839262	0.00189497249132961	0.00561313821295362	0.00251756313441398	TP53/IL6/BCL2	3
BP	GO:0010863	positive regulation of phospholipase C activity	3/137	34/18888	0.0882352941176471	12.1648776298841	5.56956441839262	0.00189497249132961	0.00561313821295362	0.00251756313441398	EGFR/SELE/ESR1	3
BP	GO:0030212	hyaluronan metabolic process	3/137	34/18888	0.0882352941176471	12.1648776298841	5.56956441839262	0.00189497249132961	0.00561313821295362	0.00251756313441398	IL1B/TGFB1/EGF	3
BP	GO:0032743	positive regulation of interleukin-2 production	3/137	34/18888	0.0882352941176471	12.1648776298841	5.56956441839262	0.00189497249132961	0.00561313821295362	0.00251756313441398	IL1B/IL1A/PNP	3
BP	GO:0043276	anoikis	3/137	34/18888	0.0882352941176471	12.1648776298841	5.56956441839262	0.00189497249132961	0.00561313821295362	0.00251756313441398	AKT1/BCL2/E2F1	3
BP	GO:0090183	regulation of kidney development	3/137	34/18888	0.0882352941176471	12.1648776298841	5.56956441839262	0.00189497249132961	0.00561313821295362	0.00251756313441398	VEGFA/STAT1/MYC	3
BP	GO:1903320	regulation of protein modification by small protein conjugation or removal	7/137	241/18888	0.029045643153527	4.00448253929794	4.01239127292484	0.00190645230338911	0.00564286790783606	0.00253089727674112	PTEN/AKT1/HSPA5/HIF1A/HSP90AA1/RELA/BIRC7	7
BP	GO:0030278	regulation of ossification	5/137	122/18888	0.040983606557377	5.65035299748714	4.40463105624897	0.0019625693179218	0.00580457339869459	0.00260342422458613	MAPK1/BCL2/VDR/HIF1A/MAPK14	5
BP	GO:0031214	biomineral tissue development	6/137	180/18888	0.0333333333333333	4.5956204379562	4.14310527866478	0.00202220417212113	0.00597643107558098	0.00268050455563815	TGFB1/NOS3/VDR/SPP1/HIF1A/PTGS2	6
BP	GO:0001838	embryonic epithelial tube formation	5/137	123/18888	0.040650406504065	5.60441516823927	4.37907420074792	0.00203400177986124	0.0060022241201943	0.00269207306077364	TGFB1/PRKACA/CASP3/HIF1A/APAF1	5
BP	GO:0045446	endothelial cell differentiation	5/137	123/18888	0.040650406504065	5.60441516823927	4.37907420074792	0.00203400177986124	0.0060022241201943	0.00269207306077364	TNF/IL1B/VEGFA/ICAM1/XDH	5
BP	GO:0046637	regulation of alpha-beta T cell differentiation	4/137	74/18888	0.0540540540540541	7.45235746695601	4.75360691886608	0.002057973968685	0.00605200586476184	0.00271440079975588	IFNG/IL2/PNP/SYK	4
BP	GO:0009119	ribonucleoside metabolic process	3/137	35/18888	0.0857142857142857	11.8173096976017	5.47510697335468	0.00206170634574495	0.00605200586476184	0.00271440079975588	XDH/PNP/HPRT1	3
BP	GO:0030224	monocyte differentiation	3/137	35/18888	0.0857142857142857	11.8173096976017	5.47510697335468	0.00206170634574495	0.00605200586476184	0.00271440079975588	PPARG/VEGFA/MYC	3
BP	GO:0030947	regulation of vascular endothelial growth factor receptor signaling pathway	3/137	35/18888	0.0857142857142857	11.8173096976017	5.47510697335468	0.00206170634574495	0.00605200586476184	0.00271440079975588	IL1B/HIF1A/PRKCB	3
BP	GO:0032872	regulation of stress-activated MAPK cascade	3/137	35/18888	0.0857142857142857	11.8173096976017	5.47510697335468	0.00206170634574495	0.00605200586476184	0.00271440079975588	MAPK1/MYC/GSTP1	3
BP	GO:0045577	regulation of B cell differentiation	3/137	35/18888	0.0857142857142857	11.8173096976017	5.47510697335468	0.00206170634574495	0.00605200586476184	0.00271440079975588	IL10/IL2/SYK	3
BP	GO:0048873	homeostasis of number of cells within a tissue	3/137	35/18888	0.0857142857142857	11.8173096976017	5.47510697335468	0.00206170634574495	0.00605200586476184	0.00271440079975588	NOS3/BCL2/BAX	3
BP	GO:0010951	negative regulation of endopeptidase activity	5/137	124/18888	0.0403225806451613	5.55921827172121	4.35379595702357	0.00210731596024268	0.00618124936575311	0.00277236813658492	TNF/AKT1/VEGFA/MMP9/SERPINA1	5
BP	GO:1901873	regulation of post-translational protein modification	7/137	246/18888	0.0284552845528455	3.92309061776749	3.94451069153971	0.00214049938166755	0.0062738774979911	0.00281391301969395	PTEN/AKT1/HSPA5/HIF1A/HSP90AA1/RELA/BIRC7	7
BP	GO:0010948	negative regulation of cell cycle process	8/137	316/18888	0.0253164556962025	3.49034463642243	3.81595	0.0021761128109462	0.0063734839631458	0.00285858777294411	TP53/PTEN/CCL2/BCL2/CDK1/CDKN1A/E2F1/MAPK14	8
BP	GO:0000077	DNA damage checkpoint signaling	5/137	125/18888	0.04	5.51474452554744	4.32879086168474	0.00218254100833989	0.0063827489473515	0.00286274323496772	TP53/CDK1/CDKN1A/E2F1/MAPK14	5
BP	GO:0002824	positive regulation of adaptive immune response based on somatic recombination of immune receptors built from immunoglobulin superfamily domains	5/137	125/18888	0.04	5.51474452554744	4.32879086168474	0.00218254100833989	0.0063827489473515	0.00286274323496772	TNF/IL6/IL1B/TGFB1/IL2	5
BP	GO:0045926	negative regulation of growth	7/137	247/18888	0.0283400809716599	3.90720765980082	3.93114881464346	0.00218986520780647	0.00639938188529395	0.00287020331697395	TP53/PTEN/TGFB1/BCL2/SPP1/HIF1A/CDKN1A	7
BP	GO:0045580	regulation of T cell differentiation	6/137	183/18888	0.0327868852459016	4.52028239798971	4.09028669522609	0.00219714620065213	0.00641586381221047	0.00287759566863444	IFNG/IL2/IRF1/ERBB2/PNP/SYK	6
BP	GO:0032094	response to food	3/137	36/18888	0.0833333333333333	11.4890510948905	5.38441211371005	0.00223728837790771	0.00647094201343499	0.00290229893508755	AKT1/MPO/CYP1A1	3
BP	GO:0045589	regulation of regulatory T cell differentiation	3/137	36/18888	0.0833333333333333	11.4890510948905	5.38441211371005	0.00223728837790771	0.00647094201343499	0.00290229893508755	IFNG/IL2/IRF1	3
BP	GO:0051968	positive regulation of synaptic transmission, glutamatergic	3/137	36/18888	0.0833333333333333	11.4890510948905	5.38441211371005	0.00223728837790771	0.00647094201343499	0.00290229893508755	EGFR/CCL2/PTGS2	3
BP	GO:0060218	hematopoietic stem cell differentiation	3/137	36/18888	0.0833333333333333	11.4890510948905	5.38441211371005	0.00223728837790771	0.00647094201343499	0.00290229893508755	TP53/ACE/BCL2	3
BP	GO:1900274	regulation of phospholipase C activity	3/137	36/18888	0.0833333333333333	11.4890510948905	5.38441211371005	0.00223728837790771	0.00647094201343499	0.00290229893508755	EGFR/SELE/ESR1	3
BP	GO:1905332	positive regulation of morphogenesis of an epithelium	3/137	36/18888	0.0833333333333333	11.4890510948905	5.38441211371005	0.00223728837790771	0.00647094201343499	0.00290229893508755	VEGFA/EGF/AR	3
BP	GO:2000406	positive regulation of T cell migration	3/137	36/18888	0.0833333333333333	11.4890510948905	5.38441211371005	0.00223728837790771	0.00647094201343499	0.00290229893508755	CCL5/CXCL10/ADAM17	3
BP	GO:0048738	cardiac muscle tissue development	7/137	248/18888	0.0282258064516129	3.89145279020485	3.91785671718868	0.00224010721650755	0.00647094201343499	0.00290229893508755	VEGFA/TGFB1/PIM1/CDK1/MAPK14/CDC42/SCN5A	7
BP	GO:0072089	stem cell proliferation	5/137	126/18888	0.0396825396825397	5.47097671185262	4.30405360195209	0.00225970612268148	0.00647094201343499	0.00290229893508755	ABCB1/TP53/TGFB1/ACE/PIM1	5
BP	GO:0002291	T cell activation via T cell receptor contact with antigen bound to MHC molecule on antigen presenting cell	2/137	10/18888	0.2	27.5737226277372	7.18462265740489	0.00226234724612932	0.00647094201343499	0.00290229893508755	ICAM1/LGALS3	2
BP	GO:0002536	respiratory burst involved in inflammatory response	2/137	10/18888	0.2	27.5737226277372	7.18462265740489	0.00226234724612932	0.00647094201343499	0.00290229893508755	NCF1/S100A9	2
BP	GO:0006527	arginine catabolic process	2/137	10/18888	0.2	27.5737226277372	7.18462265740489	0.00226234724612932	0.00647094201343499	0.00290229893508755	NOS3/NOS2	2
BP	GO:0008627	intrinsic apoptotic signaling pathway in response to osmotic stress	2/137	10/18888	0.2	27.5737226277372	7.18462265740489	0.00226234724612932	0.00647094201343499	0.00290229893508755	CASP3/PTGS2	2
BP	GO:0009155	purine deoxyribonucleotide catabolic process	2/137	10/18888	0.2	27.5737226277372	7.18462265740489	0.00226234724612932	0.00647094201343499	0.00290229893508755	XDH/PNP	2
BP	GO:0009170	purine deoxyribonucleoside monophosphate metabolic process	2/137	10/18888	0.2	27.5737226277372	7.18462265740489	0.00226234724612932	0.00647094201343499	0.00290229893508755	XDH/PNP	2
BP	GO:0009750	response to fructose	2/137	10/18888	0.2	27.5737226277372	7.18462265740489	0.00226234724612932	0.00647094201343499	0.00290229893508755	TNF/PTGS2	2
BP	GO:0014745	negative regulation of muscle adaptation	2/137	10/18888	0.2	27.5737226277372	7.18462265740489	0.00226234724612932	0.00647094201343499	0.00290229893508755	PPARG/NOS3	2
BP	GO:0031666	positive regulation of lipopolysaccharide-mediated signaling pathway	2/137	10/18888	0.2	27.5737226277372	7.18462265740489	0.00226234724612932	0.00647094201343499	0.00290229893508755	MIF/PRKCA	2
BP	GO:0034351	negative regulation of glial cell apoptotic process	2/137	10/18888	0.2	27.5737226277372	7.18462265740489	0.00226234724612932	0.00647094201343499	0.00290229893508755	CCL2/PRKCA	2
BP	GO:0035747	natural killer cell chemotaxis	2/137	10/18888	0.2	27.5737226277372	7.18462265740489	0.00226234724612932	0.00647094201343499	0.00290229893508755	CCL2/CCL5	2
BP	GO:0038129	ERBB3 signaling pathway	2/137	10/18888	0.2	27.5737226277372	7.18462265740489	0.00226234724612932	0.00647094201343499	0.00290229893508755	MAPK1/ERBB2	2
BP	GO:0070344	regulation of fat cell proliferation	2/137	10/18888	0.2	27.5737226277372	7.18462265740489	0.00226234724612932	0.00647094201343499	0.00290229893508755	E2F1/PPARD	2
BP	GO:0070391	response to lipoteichoic acid	2/137	10/18888	0.2	27.5737226277372	7.18462265740489	0.00226234724612932	0.00647094201343499	0.00290229893508755	RELA/MAPK14	2
BP	GO:0071223	cellular response to lipoteichoic acid	2/137	10/18888	0.2	27.5737226277372	7.18462265740489	0.00226234724612932	0.00647094201343499	0.00290229893508755	RELA/MAPK14	2
BP	GO:0071374	cellular response to parathyroid hormone stimulus	2/137	10/18888	0.2	27.5737226277372	7.18462265740489	0.00226234724612932	0.00647094201343499	0.00290229893508755	PRKACA/FOS	2
BP	GO:0072203	cell proliferation involved in metanephros development	2/137	10/18888	0.2	27.5737226277372	7.18462265740489	0.00226234724612932	0.00647094201343499	0.00290229893508755	STAT1/MYC	2
BP	GO:1903596	regulation of gap junction assembly	2/137	10/18888	0.2	27.5737226277372	7.18462265740489	0.00226234724612932	0.00647094201343499	0.00290229893508755	IL1B/ACE	2
BP	GO:1903799	negative regulation of miRNA processing	2/137	10/18888	0.2	27.5737226277372	7.18462265740489	0.00226234724612932	0.00647094201343499	0.00290229893508755	TP53/IL6	2
BP	GO:0002200	somatic diversification of immune receptors	4/137	76/18888	0.0526315789473684	7.25624279677295	4.6712430287066	0.00226927347618377	0.00647181567606019	0.0029026907837707	IL10/CD40LG/TGFB1/IL2	4
BP	GO:0002224	toll-like receptor signaling pathway	4/137	76/18888	0.0526315789473684	7.25624279677295	4.6712430287066	0.00226927347618377	0.00647181567606019	0.0029026907837707	IRF1/S100A9/CTSS/ESR1	4
BP	GO:0006081	cellular aldehyde metabolic process	4/137	76/18888	0.0526315789473684	7.25624279677295	4.6712430287066	0.00226927347618377	0.00647181567606019	0.0029026907837707	CYP1B1/ALDH2/RELA/TPI1	4
BP	GO:0031343	positive regulation of cell killing	4/137	76/18888	0.0526315789473684	7.25624279677295	4.6712430287066	0.00226927347618377	0.00647181567606019	0.0029026907837707	IFNG/NOS2/MAPK8/SYK	4
BP	GO:0007188	adenylate cyclase-modulating G protein-coupled receptor signaling pathway	7/137	249/18888	0.0281124497991968	3.8758244657462	3.90463371847429	0.00229123580696044	0.00652968805044849	0.0029286472720547	CHRM1/CHRM3/CHRM2/PRKACA/CXCL10/CXCL11/PRKCA	7
BP	GO:0006694	steroid biosynthetic process	6/137	185/18888	0.0324324324324324	4.4714144801736	4.05570403449945	0.00231996536626642	0.00660674769271792	0.00296320949147074	CYP3A4/NR3C1/TNF/IFNG/IL1A/CYP1A1	6
BP	GO:0002706	regulation of lymphocyte mediated immunity	6/137	186/18888	0.032258064516129	4.44737461737697	4.03859666445563	0.00238328174795087	0.00678211909351376	0.00304186577191922	IL10/TNF/IL6/IL1B/TGFB1/IL2	6
BP	GO:0002708	positive regulation of lymphocyte mediated immunity	5/137	128/18888	0.0390625	5.38549270072993	4.25536205956426	0.00241997356011698	0.00685701687028213	0.00307545836744919	TNF/IL6/IL1B/TGFB1/IL2	5
BP	GO:0006275	regulation of DNA replication	5/137	128/18888	0.0390625	5.38549270072993	4.25536205956426	0.00241997356011698	0.00685701687028213	0.00307545836744919	TP53/EGFR/CDK1/CDKN1A/CDC42	5
BP	GO:0002335	mature B cell differentiation	3/137	37/18888	0.0810810810810811	11.178536200434	5.29722655759242	0.00242187731403059	0.00685701687028213	0.00307545836744919	IL10/IL6/IL2	3
BP	GO:0045191	regulation of isotype switching	3/137	37/18888	0.0810810810810811	11.178536200434	5.29722655759242	0.00242187731403059	0.00685701687028213	0.00307545836744919	IL10/TGFB1/IL2	3
BP	GO:0046326	positive regulation of glucose import	3/137	37/18888	0.0810810810810811	11.178536200434	5.29722655759242	0.00242187731403059	0.00685701687028213	0.00307545836744919	INSR/AKT1/MAPK14	3
BP	GO:0055023	positive regulation of cardiac muscle tissue growth	3/137	37/18888	0.0810810810810811	11.178536200434	5.29722655759242	0.00242187731403059	0.00685701687028213	0.00307545836744919	PIM1/CDK1/MAPK14	3
BP	GO:0070269	pyroptosis	3/137	37/18888	0.0810810810810811	11.178536200434	5.29722655759242	0.00242187731403059	0.00685701687028213	0.00307545836744919	CASP8/CASP3/CASP1	3
BP	GO:2000146	negative regulation of cell motility	9/137	396/18888	0.0227272727272727	3.13337757133378	3.66735483658671	0.0024257321246241	0.00686296136561521	0.00307812454842238	CYP1B1/PTEN/TNF/AKT1/PPARG/TGFB1/CCL2/BCL2/MIF	9
BP	GO:0097553	calcium ion transmembrane import into cytosol	6/137	187/18888	0.0320855614973262	4.42359186541239	4.02160980247303	0.00244789144358207	0.00692064753753139	0.00310399752255412	F2/PRKACA/BCL2/CXCL10/BAX/CXCL11	6
BP	GO:0051209	release of sequestered calcium ion into cytosol	5/137	129/18888	0.0387596899224806	5.34374469529791	4.23139785767242	0.00250313448107412	0.00707171663367038	0.00317175391349976	F2/PRKACA/CXCL10/BAX/CXCL11	5
BP	GO:0051283	negative regulation of sequestering of calcium ion	5/137	130/18888	0.0384615384615385	5.30263896687254	4.20768164337202	0.00258835265399688	0.00730719052500203	0.00327736691739221	F2/PRKACA/CXCL10/BAX/CXCL11	5
BP	GO:0072088	nephron epithelium morphogenesis	4/137	79/18888	0.0506329113924051	6.98068927284487	4.55314507678308	0.00261355616757835	0.007352337810695	0.00329761604324078	VEGFA/STAT1/BCL2/MYC	4
BP	GO:0032965	regulation of collagen biosynthetic process	3/137	38/18888	0.0789473684210526	10.8843641951594	5.21332040152574	0.00261562708303753	0.007352337810695	0.00329761604324078	IL6/TGFB1/F2	3
BP	GO:0035633	maintenance of blood-brain barrier	3/137	38/18888	0.0789473684210526	10.8843641951594	5.21332040152574	0.00261562708303753	0.007352337810695	0.00329761604324078	IL6/VEGFA/PTGS2	3
BP	GO:0046688	response to copper ion	3/137	38/18888	0.0789473684210526	10.8843641951594	5.21332040152574	0.00261562708303753	0.007352337810695	0.00329761604324078	IL1A/CYP1A1/CDK1	3
BP	GO:0070302	regulation of stress-activated protein kinase signaling cascade	3/137	38/18888	0.0789473684210526	10.8843641951594	5.21332040152574	0.00261562708303753	0.007352337810695	0.00329761604324078	MAPK1/MYC/GSTP1	3
BP	GO:1902229	regulation of intrinsic apoptotic signaling pathway in response to DNA damage	3/137	38/18888	0.0789473684210526	10.8843641951594	5.21332040152574	0.00261562708303753	0.007352337810695	0.00329761604324078	BCL2/MIF/BCL2L1	3
BP	GO:0031647	regulation of protein stability	8/137	326/18888	0.0245398773006135	3.38327885002911	3.71022999092757	0.00263656956150439	0.00740588145508776	0.00332163104164119	TP53/PTEN/MAPK1/CASP3/BCL2/HSP90AA1/HSPA8/PIM1	8
BP	GO:0002821	positive regulation of adaptive immune response	5/137	131/18888	0.0381679389312977	5.26216080682008	4.18420878156055	0.00267565744820605	0.00751028041815194	0.00336845529052123	TNF/IL6/IL1B/TGFB1/IL2	5
BP	GO:0006575	cellular modified amino acid metabolic process	6/137	191/18888	0.031413612565445	4.33095119807391	3.95483661480642	0.0027195972435917	0.00762813861007429	0.0034213161729395	GSTM1/SOD2/CTSB/PLA2G10/DUOX2/GSTP1	6
BP	GO:0051966	regulation of synaptic transmission, glutamatergic	4/137	80/18888	0.05	6.89343065693431	4.51514207147751	0.00273584892245497	0.00763677497403119	0.00342518969086982	TNF/EGFR/CCL2/PTGS2	4
BP	GO:0006983	ER overload response	2/137	11/18888	0.181818181818182	25.0670205706702	6.82467132496411	0.00275197338578259	0.00763677497403119	0.00342518969086982	TP53/HSPA5	2
BP	GO:0009120	deoxyribonucleoside metabolic process	2/137	11/18888	0.181818181818182	25.0670205706702	6.82467132496411	0.00275197338578259	0.00763677497403119	0.00342518969086982	XDH/PNP	2
BP	GO:0010887	negative regulation of cholesterol storage	2/137	11/18888	0.181818181818182	25.0670205706702	6.82467132496411	0.00275197338578259	0.00763677497403119	0.00342518969086982	PPARG/PPARD	2
BP	GO:0033148	positive regulation of intracellular estrogen receptor signaling pathway	2/137	11/18888	0.181818181818182	25.0670205706702	6.82467132496411	0.00275197338578259	0.00763677497403119	0.00342518969086982	PARP1/AR	2
BP	GO:0034350	regulation of glial cell apoptotic process	2/137	11/18888	0.181818181818182	25.0670205706702	6.82467132496411	0.00275197338578259	0.00763677497403119	0.00342518969086982	CCL2/PRKCA	2
BP	GO:0042451	purine nucleoside biosynthetic process	2/137	11/18888	0.181818181818182	25.0670205706702	6.82467132496411	0.00275197338578259	0.00763677497403119	0.00342518969086982	PNP/HPRT1	2
BP	GO:0042455	ribonucleoside biosynthetic process	2/137	11/18888	0.181818181818182	25.0670205706702	6.82467132496411	0.00275197338578259	0.00763677497403119	0.00342518969086982	PNP/HPRT1	2
BP	GO:0045602	negative regulation of endothelial cell differentiation	2/137	11/18888	0.181818181818182	25.0670205706702	6.82467132496411	0.00275197338578259	0.00763677497403119	0.00342518969086982	VEGFA/XDH	2
BP	GO:0046129	purine ribonucleoside biosynthetic process	2/137	11/18888	0.181818181818182	25.0670205706702	6.82467132496411	0.00275197338578259	0.00763677497403119	0.00342518969086982	PNP/HPRT1	2
BP	GO:0051081	nuclear membrane disassembly	2/137	11/18888	0.181818181818182	25.0670205706702	6.82467132496411	0.00275197338578259	0.00763677497403119	0.00342518969086982	PRKCA/PRKCB	2
BP	GO:0060736	prostate gland growth	2/137	11/18888	0.181818181818182	25.0670205706702	6.82467132496411	0.00275197338578259	0.00763677497403119	0.00342518969086982	AR/ESR1	2
BP	GO:0062100	positive regulation of programmed necrotic cell death	2/137	11/18888	0.181818181818182	25.0670205706702	6.82467132496411	0.00275197338578259	0.00763677497403119	0.00342518969086982	TP53/PARP1	2
BP	GO:1900222	negative regulation of amyloid-beta clearance	2/137	11/18888	0.181818181818182	25.0670205706702	6.82467132496411	0.00275197338578259	0.00763677497403119	0.00342518969086982	TNF/IFNG	2
BP	GO:1901731	positive regulation of platelet aggregation	2/137	11/18888	0.181818181818182	25.0670205706702	6.82467132496411	0.00275197338578259	0.00763677497403119	0.00342518969086982	IL6/CTSG	2
BP	GO:0010466	negative regulation of peptidase activity	5/137	132/18888	0.0378787878787879	5.22229595222296	4.16097475903889	0.00276507825226958	0.00765683850309777	0.003434188436172	TNF/AKT1/VEGFA/MMP9/SERPINA1	5
BP	GO:0030301	cholesterol transport	5/137	132/18888	0.0378787878787879	5.22229595222296	4.16097475903889	0.00276507825226958	0.00765683850309777	0.003434188436172	PPARG/EGF/PON1/NFKBIA/PLA2G10	5
BP	GO:0051282	regulation of sequestering of calcium ion	5/137	132/18888	0.0378787878787879	5.22229595222296	4.16097475903889	0.00276507825226958	0.00765683850309777	0.003434188436172	F2/PRKACA/CXCL10/BAX/CXCL11	5
BP	GO:0002822	regulation of adaptive immune response based on somatic recombination of immune receptors built from immunoglobulin superfamily domains	6/137	192/18888	0.03125	4.30839416058394	3.93842942136253	0.0027909243620052	0.00772294002508161	0.0034638358007231	IL10/TNF/IL6/IL1B/TGFB1/IL2	6
BP	GO:0032373	positive regulation of sterol transport	3/137	39/18888	0.0769230769230769	10.6052779337451	5.13248441204684	0.00281868689104797	0.00778873904169439	0.00349334748780801	PPARG/PON1/NFKBIA	3
BP	GO:0032376	positive regulation of cholesterol transport	3/137	39/18888	0.0769230769230769	10.6052779337451	5.13248441204684	0.00281868689104797	0.00778873904169439	0.00349334748780801	PPARG/PON1/NFKBIA	3
BP	GO:0043271	negative regulation of monoatomic ion transport	5/137	133/18888	0.037593984962406	5.18303056912354	4.13797518040229	0.00285664446909854	0.00788059907683444	0.00353454786970149	ACE/NOS3/MMP9/BCL2/PTGS2	5
BP	GO:0002720	positive regulation of cytokine production involved in immune response	4/137	81/18888	0.0493827160493827	6.80832657474993	4.47778596420426	0.00286200784887593	0.00788059907683444	0.00353454786970149	IL6/IL1B/MIF/SYK	4
BP	GO:0032088	negative regulation of NF-kappaB transcription factor activity	4/137	81/18888	0.0493827160493827	6.80832657474993	4.47778596420426	0.00286200784887593	0.00788059907683444	0.00353454786970149	CYP1B1/IL10/CHUK/NFKBIA	4
BP	GO:0050810	regulation of steroid biosynthetic process	4/137	81/18888	0.0493827160493827	6.80832657474993	4.47778596420426	0.00286200784887593	0.00788059907683444	0.00353454786970149	NR3C1/TNF/IFNG/IL1A	4
BP	GO:0072028	nephron morphogenesis	4/137	81/18888	0.0493827160493827	6.80832657474993	4.47778596420426	0.00286200784887593	0.00788059907683444	0.00353454786970149	VEGFA/STAT1/BCL2/MYC	4
BP	GO:0002040	sprouting angiogenesis	6/137	194/18888	0.0309278350515464	4.26397772593875	3.90594828580342	0.0029377775476946	0.00807785528233888	0.00362301976049982	IL10/AKT1/VEGFA/TGFB1/PTGS2/CDC42	6
BP	GO:0030258	lipid modification	6/137	194/18888	0.0309278350515464	4.26397772593875	3.90594828580342	0.0029377775476946	0.00807785528233888	0.00362301976049982	CYP3A4/PTEN/AKT1/CYP1A1/MAPK14/PPARD	6
BP	GO:0031570	DNA integrity checkpoint signaling	5/137	134/18888	0.0373134328358209	5.14435123651814	4.11520576409953	0.00295038551107341	0.00810112875582657	0.00363345820627462	TP53/CDK1/CDKN1A/E2F1/MAPK14	5
BP	GO:0045727	positive regulation of translation	5/137	134/18888	0.0373134328358209	5.14435123651814	4.11520576409953	0.00295038551107341	0.00810112875582657	0.00363345820627462	CYP1B1/TNF/IL6/CCL5/ERBB2	5
BP	GO:1904427	positive regulation of calcium ion transmembrane transport	4/137	82/18888	0.0487804878048781	6.72529820188713	4.44105732373407	0.00299209255216481	0.00820412473980672	0.00367965320137785	F2/CXCL10/BAX/CXCL11	4
BP	GO:2000142	regulation of DNA-templated transcription initiation	4/137	82/18888	0.0487804878048781	6.72529820188713	4.44105732373407	0.00299209255216481	0.00820412473980672	0.00367965320137785	TP53/MYC/JUN/NFKBIA	4
BP	GO:1901991	negative regulation of mitotic cell cycle phase transition	6/137	195/18888	0.0307692307692308	4.24211117349804	3.88987156800667	0.0030133375491258	0.00825658711778687	0.00370318323818359	TP53/PTEN/CCL2/BCL2/CDK1/CDKN1A	6
BP	GO:0009167	purine ribonucleoside monophosphate metabolic process	3/137	40/18888	0.075	10.3401459854015	5.05452769152662	0.00303120129495169	0.00829390977135136	0.00371992291804317	XDH/PNP/HPRT1	3
BP	GO:0062098	regulation of programmed necrotic cell death	3/137	40/18888	0.075	10.3401459854015	5.05452769152662	0.00303120129495169	0.00829390977135136	0.00371992291804317	TP53/CASP8/PARP1	3
BP	GO:0006720	isoprenoid metabolic process	5/137	135/18888	0.037037037037037	5.10624493106245	4.09266233865247	0.00304633079520146	0.00832947790855785	0.00373587567523418	CYP3A4/CYP1B1/CYP2C9/EGFR/CYP1A1	5
BP	GO:0010833	telomere maintenance via telomere lengthening	4/137	83/18888	0.0481927710843374	6.64427051270777	4.40493753428647	0.00312616225823092	0.00852986352385409	0.0038257511457103	TP53/MAPK1/PARP1/HSP90AA1	4
BP	GO:0032414	positive regulation of ion transmembrane transporter activity	4/137	83/18888	0.0481927710843374	6.64427051270777	4.40493753428647	0.00312616225823092	0.00852986352385409	0.0038257511457103	ABCB1/IFNG/CCL2/CTSS	4
BP	GO:0070509	calcium ion import	4/137	83/18888	0.0481927710843374	6.64427051270777	4.40493753428647	0.00312616225823092	0.00852986352385409	0.0038257511457103	ACE/CCL2/EGF/LGALS3	4
BP	GO:0051208	sequestering of calcium ion	5/137	136/18888	0.0367647058823529	5.0686990124517	4.07034083902817	0.00314450973830637	0.0085739421734853	0.00384552097483551	F2/PRKACA/CXCL10/BAX/CXCL11	5
BP	GO:0014706	striated muscle tissue development	7/137	265/18888	0.0264150943396226	3.64181242253133	3.70194234097692	0.00323852336821813	0.00882412987437832	0.00395773330750149	VEGFA/TGFB1/PIM1/CDK1/MAPK14/CDC42/SCN5A	7
BP	GO:0060421	positive regulation of heart growth	3/137	41/18888	0.0731707317073171	10.0879473028307	4.97927565855738	0.00325331027508382	0.00884448563192186	0.00396686312095351	PIM1/CDK1/MAPK14	3
BP	GO:0071542	dopaminergic neuron differentiation	3/137	41/18888	0.0731707317073171	10.0879473028307	4.97927565855738	0.00325331027508382	0.00884448563192186	0.00396686312095351	VEGFA/HIF1A/HPRT1	3
BP	GO:0002437	inflammatory response to antigenic stimulus	4/137	84/18888	0.0476190476190476	6.56517205422315	4.36940875190571	0.00326427580036621	0.00884448563192186	0.00396686312095351	IL10/TNF/MAPK14/SYK	4
BP	GO:0010749	regulation of nitric oxide mediated signal transduction	2/137	12/18888	0.166666666666667	22.978102189781	6.5096162013163	0.00328671038956073	0.00884448563192186	0.00396686312095351	EGFR/VEGFA	2
BP	GO:0010936	negative regulation of macrophage cytokine production	2/137	12/18888	0.166666666666667	22.978102189781	6.5096162013163	0.00328671038956073	0.00884448563192186	0.00396686312095351	TGFB1/AXL	2
BP	GO:0014854	response to inactivity	2/137	12/18888	0.166666666666667	22.978102189781	6.5096162013163	0.00328671038956073	0.00884448563192186	0.00396686312095351	IL10/SCN5A	2
BP	GO:0030397	membrane disassembly	2/137	12/18888	0.166666666666667	22.978102189781	6.5096162013163	0.00328671038956073	0.00884448563192186	0.00396686312095351	PRKCA/PRKCB	2
BP	GO:0030656	regulation of vitamin metabolic process	2/137	12/18888	0.166666666666667	22.978102189781	6.5096162013163	0.00328671038956073	0.00884448563192186	0.00396686312095351	TNF/IFNG	2
BP	GO:0031392	regulation of prostaglandin biosynthetic process	2/137	12/18888	0.166666666666667	22.978102189781	6.5096162013163	0.00328671038956073	0.00884448563192186	0.00396686312095351	IL1B/PTGS2	2
BP	GO:0033145	positive regulation of intracellular steroid hormone receptor signaling pathway	2/137	12/18888	0.166666666666667	22.978102189781	6.5096162013163	0.00328671038956073	0.00884448563192186	0.00396686312095351	PARP1/AR	2
BP	GO:0043174	nucleoside salvage	2/137	12/18888	0.166666666666667	22.978102189781	6.5096162013163	0.00328671038956073	0.00884448563192186	0.00396686312095351	PNP/HPRT1	2
BP	GO:0048548	regulation of pinocytosis	2/137	12/18888	0.166666666666667	22.978102189781	6.5096162013163	0.00328671038956073	0.00884448563192186	0.00396686312095351	AXL/CDC42	2
BP	GO:0070099	regulation of chemokine-mediated signaling pathway	2/137	12/18888	0.166666666666667	22.978102189781	6.5096162013163	0.00328671038956073	0.00884448563192186	0.00396686312095351	CCL5/HIF1A	2
BP	GO:0070561	vitamin D receptor signaling pathway	2/137	12/18888	0.166666666666667	22.978102189781	6.5096162013163	0.00328671038956073	0.00884448563192186	0.00396686312095351	VDR/PIM1	2
BP	GO:0097067	cellular response to thyroid hormone stimulus	2/137	12/18888	0.166666666666667	22.978102189781	6.5096162013163	0.00328671038956073	0.00884448563192186	0.00396686312095351	CTSB/CTSS	2
BP	GO:0160049	negative regulation of cGAS/STING signaling pathway	2/137	12/18888	0.166666666666667	22.978102189781	6.5096162013163	0.00328671038956073	0.00884448563192186	0.00396686312095351	AKT1/PARP1	2
BP	GO:1902337	regulation of apoptotic process involved in morphogenesis	2/137	12/18888	0.166666666666667	22.978102189781	6.5096162013163	0.00328671038956073	0.00884448563192186	0.00396686312095351	VDR/BAX	2
BP	GO:1905461	positive regulation of vascular associated smooth muscle cell apoptotic process	2/137	12/18888	0.166666666666667	22.978102189781	6.5096162013163	0.00328671038956073	0.00884448563192186	0.00396686312095351	PPARG/SOD2	2
BP	GO:0006986	response to unfolded protein	5/137	138/18888	0.036231884057971	4.99523960647413	4.02634786858558	0.00334768623919105	0.00900237496233631	0.00403767847280988	BAX/HSPA5/HSP90AA1/HSPB1/HSPA8	5
BP	GO:0051149	positive regulation of muscle cell differentiation	4/137	85/18888	0.0470588235294118	6.48793473593817	4.33445386365986	0.00340649160643155	0.00915421455748959	0.00410578044226078	TGFB1/BCL2/SOD2/MAPK14	4
BP	GO:0007369	gastrulation	6/137	200/18888	0.03	4.13605839416058	3.81107313218027	0.00341315391495948	0.00916581854910136	0.00411098497854432	TP53/IL10/MMP2/PRKACA/MMP9/GPI	6
BP	GO:0007178	transmembrane receptor protein serine/threonine kinase signaling pathway	9/137	417/18888	0.0215827338129496	2.97558157853279	3.48696307172112	0.00341722383200484	0.00917044967957374	0.00411306209884772	TP53/PPARG/TGFB1/HSPA5/JUN/PARP1/FOS/ADAM17/MAPK14	9
BP	GO:0002251	organ or tissue specific immune response	3/137	42/18888	0.0714285714285714	9.84775808133472	4.90656829397979	0.0034851493070099	0.00927633341756891	0.00416055228797141	IL6/NOS2/RNASE3	3
BP	GO:0002691	regulation of cellular extravasation	3/137	42/18888	0.0714285714285714	9.84775808133472	4.90656829397979	0.0034851493070099	0.00927633341756891	0.00416055228797141	ICAM1/SELP/SELE	3
BP	GO:0002714	positive regulation of B cell mediated immunity	3/137	42/18888	0.0714285714285714	9.84775808133472	4.90656829397979	0.0034851493070099	0.00927633341756891	0.00416055228797141	TNF/TGFB1/IL2	3
BP	GO:0002891	positive regulation of immunoglobulin mediated immune response	3/137	42/18888	0.0714285714285714	9.84775808133472	4.90656829397979	0.0034851493070099	0.00927633341756891	0.00416055228797141	TNF/TGFB1/IL2	3
BP	GO:0009126	purine nucleoside monophosphate metabolic process	3/137	42/18888	0.0714285714285714	9.84775808133472	4.90656829397979	0.0034851493070099	0.00927633341756891	0.00416055228797141	XDH/PNP/HPRT1	3
BP	GO:0009409	response to cold	3/137	42/18888	0.0714285714285714	9.84775808133472	4.90656829397979	0.0034851493070099	0.00927633341756891	0.00416055228797141	PRKACA/NFKBIA/HSP90AA1	3
BP	GO:0014044	Schwann cell development	3/137	42/18888	0.0714285714285714	9.84775808133472	4.90656829397979	0.0034851493070099	0.00927633341756891	0.00416055228797141	AKT1/MAPK1/ERBB2	3
BP	GO:0032733	positive regulation of interleukin-10 production	3/137	42/18888	0.0714285714285714	9.84775808133472	4.90656829397979	0.0034851493070099	0.00927633341756891	0.00416055228797141	CD40LG/IL6/SYK	3
BP	GO:0046627	negative regulation of insulin receptor signaling pathway	3/137	42/18888	0.0714285714285714	9.84775808133472	4.90656829397979	0.0034851493070099	0.00927633341756891	0.00416055228797141	IL1B/RELA/PRKCB	3
BP	GO:0048512	circadian behavior	3/137	42/18888	0.0714285714285714	9.84775808133472	4.90656829397979	0.0034851493070099	0.00927633341756891	0.00416055228797141	TP53/PTEN/PARP1	3
BP	GO:0050691	regulation of defense response to virus by host	3/137	42/18888	0.0714285714285714	9.84775808133472	4.90656829397979	0.0034851493070099	0.00927633341756891	0.00416055228797141	IL1B/STAT1/HSP90AA1	3
BP	GO:2000008	regulation of protein localization to cell surface	3/137	42/18888	0.0714285714285714	9.84775808133472	4.90656829397979	0.0034851493070099	0.00927633341756891	0.00416055228797141	TNF/AKT1/EGF	3
BP	GO:0048864	stem cell development	4/137	86/18888	0.0465116279069767	6.41249363435749	4.30005644944956	0.00355286768642617	0.00944372036296826	0.00423562743968371	MAPK1/BCL2/HIF1A/CDC42	4
BP	GO:0071230	cellular response to amino acid stimulus	4/137	86/18888	0.0465116279069767	6.41249363435749	4.30005644944956	0.00355286768642617	0.00944372036296826	0.00423562743968371	TNF/EGFR/MMP2/BCL2L1	4
BP	GO:0009791	post-embryonic development	4/137	87/18888	0.0459770114942529	6.33878681097408	4.26620074623124	0.0037034616204335	0.0098373199292765	0.00441216179894323	VEGFA/BCL2/BAX/SOD2	4
BP	GO:0010712	regulation of collagen metabolic process	3/137	43/18888	0.0697674418604651	9.61874045153624	4.83625861220095	0.00372684943243021	0.00987261604390387	0.00442799255058389	IL6/TGFB1/F2	3
BP	GO:0046640	regulation of alpha-beta T cell proliferation	3/137	43/18888	0.0697674418604651	9.61874045153624	4.83625861220095	0.00372684943243021	0.00987261604390387	0.00442799255058389	IL2/IRF1/SYK	3
BP	GO:1900077	negative regulation of cellular response to insulin stimulus	3/137	43/18888	0.0697674418604651	9.61874045153624	4.83625861220095	0.00372684943243021	0.00987261604390387	0.00442799255058389	IL1B/RELA/PRKCB	3
BP	GO:2000403	positive regulation of lymphocyte migration	3/137	43/18888	0.0697674418604651	9.61874045153624	4.83625861220095	0.00372684943243021	0.00987261604390387	0.00442799255058389	CCL5/CXCL10/ADAM17	3
BP	GO:0051346	negative regulation of hydrolase activity	6/137	204/18888	0.0294117647058824	4.05495920996136	3.74986063337303	0.00376045639503507	0.00995489810737111	0.00446489709163555	TNF/AKT1/VEGFA/MMP9/LGALS3/SERPINA1	6
BP	GO:0045185	maintenance of protein location	4/137	88/18888	0.0454545454545455	6.26675514266755	4.23287161447623	0.00385833054693707	0.0101311133879621	0.00454393186279308	IL10/AKT1/HSPA5/NFKBIA	4
BP	GO:0014004	microglia differentiation	2/137	13/18888	0.153846153846154	21.2105558674902	6.23068809535533	0.00386588776850115	0.0101311133879621	0.00454393186279308	NR3C1/TGFB1	2
BP	GO:0032494	response to peptidoglycan	2/137	13/18888	0.153846153846154	21.2105558674902	6.23068809535533	0.00386588776850115	0.0101311133879621	0.00454393186279308	IL6/RELA	2
BP	GO:0046541	saliva secretion	2/137	13/18888	0.153846153846154	21.2105558674902	6.23068809535533	0.00386588776850115	0.0101311133879621	0.00454393186279308	CHRM1/CHRM3	2
BP	GO:0060965	negative regulation of miRNA-mediated gene silencing	2/137	13/18888	0.153846153846154	21.2105558674902	6.23068809535533	0.00386588776850115	0.0101311133879621	0.00454393186279308	TP53/IL6	2
BP	GO:0070234	positive regulation of T cell apoptotic process	2/137	13/18888	0.153846153846154	21.2105558674902	6.23068809535533	0.00386588776850115	0.0101311133879621	0.00454393186279308	TP53/CCL5	2
BP	GO:0070243	regulation of thymocyte apoptotic process	2/137	13/18888	0.153846153846154	21.2105558674902	6.23068809535533	0.00386588776850115	0.0101311133879621	0.00454393186279308	TP53/HIF1A	2
BP	GO:0070417	cellular response to cold	2/137	13/18888	0.153846153846154	21.2105558674902	6.23068809535533	0.00386588776850115	0.0101311133879621	0.00454393186279308	PRKACA/NFKBIA	2
BP	GO:0070486	leukocyte aggregation	2/137	13/18888	0.153846153846154	21.2105558674902	6.23068809535533	0.00386588776850115	0.0101311133879621	0.00454393186279308	IL1B/S100A9	2
BP	GO:0071107	response to parathyroid hormone	2/137	13/18888	0.153846153846154	21.2105558674902	6.23068809535533	0.00386588776850115	0.0101311133879621	0.00454393186279308	PRKACA/FOS	2
BP	GO:0071679	commissural neuron axon guidance	2/137	13/18888	0.153846153846154	21.2105558674902	6.23068809535533	0.00386588776850115	0.0101311133879621	0.00454393186279308	VEGFA/ADAM17	2
BP	GO:0140896	cGAS/STING signaling pathway	2/137	13/18888	0.153846153846154	21.2105558674902	6.23068809535533	0.00386588776850115	0.0101311133879621	0.00454393186279308	AKT1/PARP1	2
BP	GO:1903238	positive regulation of leukocyte tethering or rolling	2/137	13/18888	0.153846153846154	21.2105558674902	6.23068809535533	0.00386588776850115	0.0101311133879621	0.00454393186279308	SELP/SELE	2
BP	GO:1903377	negative regulation of oxidative stress-induced neuron intrinsic apoptotic signaling pathway	2/137	13/18888	0.153846153846154	21.2105558674902	6.23068809535533	0.00386588776850115	0.0101311133879621	0.00454393186279308	IL10/HIF1A	2
BP	GO:1904748	regulation of apoptotic process involved in development	2/137	13/18888	0.153846153846154	21.2105558674902	6.23068809535533	0.00386588776850115	0.0101311133879621	0.00454393186279308	VDR/BAX	2
BP	GO:0021537	telencephalon development	7/137	275/18888	0.0254545454545455	3.50938287989383	3.58306466226191	0.00396684036656849	0.0103776390641915	0.00465450173130785	PTEN/EGFR/CASP3/BAX/HIF1A/HPRT1/SCN5A	7
BP	GO:0007622	rhythmic behavior	3/137	44/18888	0.0681818181818182	9.40013271400133	4.7682113243672	0.00397853732921306	0.0103776390641915	0.00465450173130785	TP53/PTEN/PARP1	3
BP	GO:0010828	positive regulation of glucose transmembrane transport	3/137	44/18888	0.0681818181818182	9.40013271400133	4.7682113243672	0.00397853732921306	0.0103776390641915	0.00465450173130785	INSR/AKT1/MAPK14	3
BP	GO:0010907	positive regulation of glucose metabolic process	3/137	44/18888	0.0681818181818182	9.40013271400133	4.7682113243672	0.00397853732921306	0.0103776390641915	0.00465450173130785	INSR/AKT1/PRKACA	3
BP	GO:0051602	response to electrical stimulus	3/137	44/18888	0.0681818181818182	9.40013271400133	4.7682113243672	0.00397853732921306	0.0103776390641915	0.00465450173130785	PTEN/MMP2/SOD2	3
BP	GO:0051972	regulation of telomerase activity	3/137	44/18888	0.0681818181818182	9.40013271400133	4.7682113243672	0.00397853732921306	0.0103776390641915	0.00465450173130785	MAPK1/MYC/HSP90AA1	3
BP	GO:1905521	regulation of macrophage migration	3/137	44/18888	0.0681818181818182	9.40013271400133	4.7682113243672	0.00397853732921306	0.0103776390641915	0.00465450173130785	MAPK1/CCL5/MIF	3
BP	GO:0010565	regulation of cellular ketone metabolic process	5/137	144/18888	0.0347222222222222	4.78710462287105	3.89930285951518	0.00401387921238316	0.0104375726261564	0.00468138268816166	AKT1/IL1B/PPARG/PPARD/PTGS2	5
BP	GO:0001843	neural tube closure	4/137	89/18888	0.0449438202247191	6.19634216353646	4.20005450670252	0.00401753115150008	0.0104375726261564	0.00468138268816166	TGFB1/PRKACA/CASP3/APAF1	4
BP	GO:0006094	gluconeogenesis	4/137	89/18888	0.0449438202247191	6.19634216353646	4.20005450670252	0.00401753115150008	0.0104375726261564	0.00468138268816166	NR3C1/PRKACA/GPI/TPI1	4
BP	GO:0016101	diterpenoid metabolic process	4/137	89/18888	0.0449438202247191	6.19634216353646	4.20005450670252	0.00401753115150008	0.0104375726261564	0.00468138268816166	CYP3A4/CYP1B1/EGFR/CYP1A1	4
BP	GO:0050672	negative regulation of lymphocyte proliferation	4/137	89/18888	0.0449438202247191	6.19634216353646	4.20005450670252	0.00401753115150008	0.0104375726261564	0.00468138268816166	IL10/IL2/CASP3/ERBB2	4
BP	GO:2000027	regulation of animal organ morphogenesis	4/137	89/18888	0.0449438202247191	6.19634216353646	4.20005450670252	0.00401753115150008	0.0104375726261564	0.00468138268816166	TNF/VEGFA/AR/PRKCB	4
BP	GO:0009566	fertilization	6/137	207/18888	0.0289855072463768	3.99619168517931	3.70496631502198	0.00403767031149722	0.0104829288963839	0.00470172554620421	PLAT/BAX/BCL2L1/PLA2G10/AR/CDK1	6
BP	GO:0140014	mitotic nuclear division	7/137	277/18888	0.0252707581227437	3.48404437534586	3.55995031466381	0.00412632924822124	0.0107060035570969	0.00480177733910983	TNF/INSR/IL1B/IL1A/EGF/CDK1/CDC42	7
BP	GO:0015918	sterol transport	5/137	145/18888	0.0344827586206897	4.75409010823056	3.87881170943188	0.00413348247547959	0.0107103488927271	0.00480372627682955	PPARG/EGF/PON1/NFKBIA/PLA2G10	5
BP	GO:0071333	cellular response to glucose stimulus	5/137	145/18888	0.0344827586206897	4.75409010823056	3.87881170943188	0.00413348247547959	0.0107103488927271	0.00480372627682955	ACE/ICAM1/PRKACA/HIF1A/NCF1	5
BP	GO:0010507	negative regulation of autophagy	4/137	90/18888	0.0444444444444444	6.12749391727494	4.16773543792913	0.00418111965580252	0.0108194426566432	0.00485265620297956	TP53/IL10/AKT1/BCL2	4
BP	GO:0060606	tube closure	4/137	90/18888	0.0444444444444444	6.12749391727494	4.16773543792913	0.00418111965580252	0.0108194426566432	0.00485265620297956	TGFB1/PRKACA/CASP3/APAF1	4
BP	GO:0006260	DNA replication	7/137	278/18888	0.0251798561151079	3.47151184162159	3.54847266307838	0.00420787570735968	0.0108814775236616	0.00488047962159651	TP53/EGFR/PARP1/TOP1/CDK1/CDKN1A/CDC42	7
BP	GO:0040013	negative regulation of locomotion	9/137	431/18888	0.0208816705336427	2.87892695649229	3.37285392694695	0.00423879516399029	0.0109292757666544	0.00490191773515848	CYP1B1/PTEN/TNF/AKT1/PPARG/TGFB1/CCL2/BCL2/MIF	9
BP	GO:0018198	peptidyl-cysteine modification	3/137	45/18888	0.0666666666666667	9.19124087591241	4.70230166555512	0.00424033538056642	0.0109292757666544	0.00490191773515848	ACE/NOS2/S100A9	3
BP	GO:0032941	secretion by tissue	3/137	45/18888	0.0666666666666667	9.19124087591241	4.70230166555512	0.00424033538056642	0.0109292757666544	0.00490191773515848	CHRM1/CHRM3/EGFR	3
BP	GO:0035196	miRNA processing	3/137	45/18888	0.0666666666666667	9.19124087591241	4.70230166555512	0.00424033538056642	0.0109292757666544	0.00490191773515848	TP53/IL6/TGFB1	3
BP	GO:0042149	cellular response to glucose starvation	3/137	45/18888	0.0666666666666667	9.19124087591241	4.70230166555512	0.00424033538056642	0.0109292757666544	0.00490191773515848	TP53/BCL2/HSPA5	3
BP	GO:0098742	cell-cell adhesion via plasma-membrane adhesion molecules	7/137	279/18888	0.025089605734767	3.45906914684876	3.53704741280715	0.00429063877770377	0.0110516453365097	0.00495680202735905	IL10/ICAM1/SELP/SELE/VCAM1/CLDN4/MAPK14	7
BP	GO:0014910	regulation of smooth muscle cell migration	4/137	91/18888	0.043956043956044	6.06015881928291	4.13590095791588	0.00434915180702946	0.011194985889062	0.00502109206923605	CYP1B1/ACE/CCL5/BCL2	4
BP	GO:0006936	muscle contraction	8/137	355/18888	0.0225352112676056	3.10689832425208	3.42542488294549	0.0044123235645412	0.0113501218008922	0.00509067247820336	CHRM3/CHRM2/TNF/PRKACA/CHUK/HSP90AA1/PTGS2/SCN5A	8
BP	GO:0002069	columnar/cuboidal epithelial cell maturation	2/137	14/18888	0.142857142857143	19.6955161626694	5.98134784278743	0.0044888422632361	0.0114341193806209	0.00512834644988948	HIF1A/CDKN1A	2
BP	GO:0009159	deoxyribonucleoside monophosphate catabolic process	2/137	14/18888	0.142857142857143	19.6955161626694	5.98134784278743	0.0044888422632361	0.0114341193806209	0.00512834644988948	XDH/PNP	2
BP	GO:0030238	male sex determination	2/137	14/18888	0.142857142857143	19.6955161626694	5.98134784278743	0.0044888422632361	0.0114341193806209	0.00512834644988948	INSR/AR	2
BP	GO:0043922	negative regulation by host of viral transcription	2/137	14/18888	0.142857142857143	19.6955161626694	5.98134784278743	0.0044888422632361	0.0114341193806209	0.00512834644988948	CCL5/JUN	2
BP	GO:0045348	positive regulation of MHC class II biosynthetic process	2/137	14/18888	0.142857142857143	19.6955161626694	5.98134784278743	0.0044888422632361	0.0114341193806209	0.00512834644988948	IL10/IFNG	2
BP	GO:0050930	induction of positive chemotaxis	2/137	14/18888	0.142857142857143	19.6955161626694	5.98134784278743	0.0044888422632361	0.0114341193806209	0.00512834644988948	VEGFA/CXCL8	2
BP	GO:0051547	regulation of keratinocyte migration	2/137	14/18888	0.142857142857143	19.6955161626694	5.98134784278743	0.0044888422632361	0.0114341193806209	0.00512834644988948	PTEN/MMP9	2
BP	GO:0060149	negative regulation of post-transcriptional gene silencing	2/137	14/18888	0.142857142857143	19.6955161626694	5.98134784278743	0.0044888422632361	0.0114341193806209	0.00512834644988948	TP53/IL6	2
BP	GO:0060967	negative regulation of gene silencing by regulatory ncRNA	2/137	14/18888	0.142857142857143	19.6955161626694	5.98134784278743	0.0044888422632361	0.0114341193806209	0.00512834644988948	TP53/IL6	2
BP	GO:0072075	metanephric mesenchyme development	2/137	14/18888	0.142857142857143	19.6955161626694	5.98134784278743	0.0044888422632361	0.0114341193806209	0.00512834644988948	STAT1/MYC	2
BP	GO:0072683	T cell extravasation	2/137	14/18888	0.142857142857143	19.6955161626694	5.98134784278743	0.0044888422632361	0.0114341193806209	0.00512834644988948	CCL2/ICAM1	2
BP	GO:1900369	negative regulation of post-transcriptional gene silencing by regulatory ncRNA	2/137	14/18888	0.142857142857143	19.6955161626694	5.98134784278743	0.0044888422632361	0.0114341193806209	0.00512834644988948	TP53/IL6	2
BP	GO:1903265	positive regulation of tumor necrosis factor-mediated signaling pathway	2/137	14/18888	0.142857142857143	19.6955161626694	5.98134784278743	0.0044888422632361	0.0114341193806209	0.00512834644988948	CASP1/ADAM17	2
BP	GO:1903894	regulation of IRE1-mediated unfolded protein response	2/137	14/18888	0.142857142857143	19.6955161626694	5.98134784278743	0.0044888422632361	0.0114341193806209	0.00512834644988948	BAX/HSPA5	2
BP	GO:2001279	regulation of unsaturated fatty acid biosynthetic process	2/137	14/18888	0.142857142857143	19.6955161626694	5.98134784278743	0.0044888422632361	0.0114341193806209	0.00512834644988948	IL1B/PTGS2	2
BP	GO:0071331	cellular response to hexose stimulus	5/137	148/18888	0.0337837837837838	4.6577234168475	3.81844451138234	0.0045075693383588	0.0114567106600815	0.00513847892305716	ACE/ICAM1/PRKACA/HIF1A/NCF1	5
BP	GO:0003009	skeletal muscle contraction	3/137	46/18888	0.0652173913043478	8.99143129165344	4.63841436270432	0.00451236174335692	0.0114567106600815	0.00513847892305716	TNF/CHUK/HSP90AA1	3
BP	GO:0045646	regulation of erythrocyte differentiation	3/137	46/18888	0.0652173913043478	8.99143129165344	4.63841436270432	0.00451236174335692	0.0114567106600815	0.00513847892305716	STAT1/HIF1A/MAPK14	3
BP	GO:0046633	alpha-beta T cell proliferation	3/137	46/18888	0.0652173913043478	8.99143129165344	4.63841436270432	0.00451236174335692	0.0114567106600815	0.00513847892305716	IL2/IRF1/SYK	3
BP	GO:0140467	integrated stress response signaling	3/137	46/18888	0.0652173913043478	8.99143129165344	4.63841436270432	0.00451236174335692	0.0114567106600815	0.00513847892305716	HSPA5/JUN/FOS	3
BP	GO:0019319	hexose biosynthetic process	4/137	92/18888	0.0434782608695652	5.99428752776896	4.10453812506214	0.00452168286760455	0.0114729266789966	0.00514575201163235	NR3C1/PRKACA/GPI/TPI1	4
BP	GO:0008277	regulation of G protein-coupled receptor signaling pathway	5/137	149/18888	0.0335570469798658	4.62646352814383	3.79868078084804	0.00463745415322487	0.0117590439293834	0.00527407919944885	CXCL8/F2/CCL5/HIF1A/PRKCA	5
BP	GO:0048525	negative regulation of viral process	4/137	93/18888	0.043010752688172	5.9298328231693	4.07363448184869	0.00469876760526282	0.0118990811765399	0.00533688766728106	TNF/STAT1/CCL5/ISG20	4
BP	GO:1903432	regulation of TORC1 signaling	4/137	93/18888	0.043010752688172	5.9298328231693	4.07363448184869	0.00469876760526282	0.0118990811765399	0.00533688766728106	AKT1/PRKACA/PIM1/SYK	4
BP	GO:0060537	muscle tissue development	9/137	438/18888	0.0205479452054795	2.83291670832917	3.31750172204714	0.0047037409102351	0.0119039656692681	0.00533907842374497	VEGFA/TGFB1/BCL2/FOS/PIM1/CDK1/MAPK14/CDC42/SCN5A	9
BP	GO:0071326	cellular response to monosaccharide stimulus	5/137	150/18888	0.0333333333333333	4.5956204379562	3.77909151862743	0.00476998183227951	0.0120637962252347	0.00541076443969338	ACE/ICAM1/PRKACA/HIF1A/NCF1	5
BP	GO:0045933	positive regulation of muscle contraction	3/137	47/18888	0.0638297872340425	8.80012424289486	4.57644272374661	0.00479473041558568	0.0121185494020297	0.00543532192859915	CHRM3/HSP90AA1/PTGS2	3
BP	GO:1901888	regulation of cell junction assembly	6/137	215/18888	0.027906976744186	3.8474961806145	3.58925974684485	0.00485086548580244	0.0122525090758963	0.00549540452831964	PTEN/TNF/IL1B/VEGFA/ACE/PRKACA	6
BP	GO:0035966	response to topologically incorrect protein	5/137	152/18888	0.0328947368421053	4.5351517479831	3.7404251870153	0.00504308115433466	0.0127297916807286	0.00570947178357619	BAX/HSPA5/HSP90AA1/HSPB1/HSPA8	5
BP	GO:0043279	response to alkaloid	4/137	95/18888	0.0421052631578947	5.80499423741836	4.01315721727961	0.00506681465208874	0.0127648692227821	0.00572520450266656	CASP3/HSP90AA1/BCL2L1/BCHE	4
BP	GO:0001774	microglial cell activation	3/137	48/18888	0.0625	8.61678832116788	4.51628783145382	0.00508755130302974	0.0127648692227821	0.00572520450266656	TNF/IL6/IFNG	3
BP	GO:0003254	regulation of membrane depolarization	3/137	48/18888	0.0625	8.61678832116788	4.51628783145382	0.00508755130302974	0.0127648692227821	0.00572520450266656	BCL2/PARP1/SCN5A	3
BP	GO:0032964	collagen biosynthetic process	3/137	48/18888	0.0625	8.61678832116788	4.51628783145382	0.00508755130302974	0.0127648692227821	0.00572520450266656	IL6/TGFB1/F2	3
BP	GO:0043407	negative regulation of MAP kinase activity	3/137	48/18888	0.0625	8.61678832116788	4.51628783145382	0.00508755130302974	0.0127648692227821	0.00572520450266656	IL1B/PPARG/GSTP1	3
BP	GO:0060043	regulation of cardiac muscle cell proliferation	3/137	48/18888	0.0625	8.61678832116788	4.51628783145382	0.00508755130302974	0.0127648692227821	0.00572520450266656	PIM1/CDK1/MAPK14	3
BP	GO:2000378	negative regulation of reactive oxygen species metabolic process	3/137	48/18888	0.0625	8.61678832116788	4.51628783145382	0.00508755130302974	0.0127648692227821	0.00572520450266656	TP53/BCL2/HIF1A	3
BP	GO:0006978	DNA damage response, signal transduction by p53 class mediator resulting in transcription of p21 class mediator	2/137	15/18888	0.133333333333333	18.3824817518248	5.75660590098203	0.00515491777564524	0.0127648692227821	0.00572520450266656	TP53/CDKN1A	2
BP	GO:0007567	parturition	2/137	15/18888	0.133333333333333	18.3824817518248	5.75660590098203	0.00515491777564524	0.0127648692227821	0.00572520450266656	MMP2/CYP1A1	2
BP	GO:0010763	positive regulation of fibroblast migration	2/137	15/18888	0.133333333333333	18.3824817518248	5.75660590098203	0.00515491777564524	0.0127648692227821	0.00572520450266656	AKT1/TGFB1	2
BP	GO:0010820	positive regulation of T cell chemotaxis	2/137	15/18888	0.133333333333333	18.3824817518248	5.75660590098203	0.00515491777564524	0.0127648692227821	0.00572520450266656	CCL5/ADAM17	2
BP	GO:0032725	positive regulation of granulocyte macrophage colony-stimulating factor production	2/137	15/18888	0.133333333333333	18.3824817518248	5.75660590098203	0.00515491777564524	0.0127648692227821	0.00572520450266656	IL1B/SYK	2
BP	GO:0036446	myofibroblast differentiation	2/137	15/18888	0.133333333333333	18.3824817518248	5.75660590098203	0.00515491777564524	0.0127648692227821	0.00572520450266656	TGFB1/PARP1	2
BP	GO:0043101	purine-containing compound salvage	2/137	15/18888	0.133333333333333	18.3824817518248	5.75660590098203	0.00515491777564524	0.0127648692227821	0.00572520450266656	PNP/HPRT1	2
BP	GO:0043374	CD8-positive, alpha-beta T cell differentiation	2/137	15/18888	0.133333333333333	18.3824817518248	5.75660590098203	0.00515491777564524	0.0127648692227821	0.00572520450266656	BCL2/IRF1	2
BP	GO:0045725	positive regulation of glycogen biosynthetic process	2/137	15/18888	0.133333333333333	18.3824817518248	5.75660590098203	0.00515491777564524	0.0127648692227821	0.00572520450266656	INSR/AKT1	2
BP	GO:0048070	regulation of developmental pigmentation	2/137	15/18888	0.133333333333333	18.3824817518248	5.75660590098203	0.00515491777564524	0.0127648692227821	0.00572520450266656	BCL2/BAX	2
BP	GO:0048308	organelle inheritance	2/137	15/18888	0.133333333333333	18.3824817518248	5.75660590098203	0.00515491777564524	0.0127648692227821	0.00572520450266656	MAPK1/CDK1	2
BP	GO:0048313	Golgi inheritance	2/137	15/18888	0.133333333333333	18.3824817518248	5.75660590098203	0.00515491777564524	0.0127648692227821	0.00572520450266656	MAPK1/CDK1	2
BP	GO:0051220	cytoplasmic sequestering of protein	2/137	15/18888	0.133333333333333	18.3824817518248	5.75660590098203	0.00515491777564524	0.0127648692227821	0.00572520450266656	IL10/NFKBIA	2
BP	GO:0061307	cardiac neural crest cell differentiation involved in heart development	2/137	15/18888	0.133333333333333	18.3824817518248	5.75660590098203	0.00515491777564524	0.0127648692227821	0.00572520450266656	MAPK1/CDC42	2
BP	GO:0061308	cardiac neural crest cell development involved in heart development	2/137	15/18888	0.133333333333333	18.3824817518248	5.75660590098203	0.00515491777564524	0.0127648692227821	0.00572520450266656	MAPK1/CDC42	2
BP	GO:0061684	chaperone-mediated autophagy	2/137	15/18888	0.133333333333333	18.3824817518248	5.75660590098203	0.00515491777564524	0.0127648692227821	0.00572520450266656	HSP90AA1/HSPA8	2
BP	GO:0070341	fat cell proliferation	2/137	15/18888	0.133333333333333	18.3824817518248	5.75660590098203	0.00515491777564524	0.0127648692227821	0.00572520450266656	E2F1/PPARD	2
BP	GO:0070989	oxidative demethylation	2/137	15/18888	0.133333333333333	18.3824817518248	5.75660590098203	0.00515491777564524	0.0127648692227821	0.00572520450266656	CYP3A4/CYP2C9	2
BP	GO:0071639	positive regulation of monocyte chemotactic protein-1 production	2/137	15/18888	0.133333333333333	18.3824817518248	5.75660590098203	0.00515491777564524	0.0127648692227821	0.00572520450266656	IL1B/SYK	2
BP	GO:1902166	negative regulation of intrinsic apoptotic signaling pathway in response to DNA damage by p53 class mediator	2/137	15/18888	0.133333333333333	18.3824817518248	5.75660590098203	0.00515491777564524	0.0127648692227821	0.00572520450266656	BCL2/MIF	2
BP	GO:2000402	negative regulation of lymphocyte migration	2/137	15/18888	0.133333333333333	18.3824817518248	5.75660590098203	0.00515491777564524	0.0127648692227821	0.00572520450266656	AKT1/CCL2	2
BP	GO:2000671	regulation of motor neuron apoptotic process	2/137	15/18888	0.133333333333333	18.3824817518248	5.75660590098203	0.00515491777564524	0.0127648692227821	0.00572520450266656	BCL2/BAX	2
BP	GO:2001028	positive regulation of endothelial cell chemotaxis	2/137	15/18888	0.133333333333333	18.3824817518248	5.75660590098203	0.00515491777564524	0.0127648692227821	0.00572520450266656	VEGFA/HSPB1	2
BP	GO:0007612	learning	5/137	153/18888	0.0326797385620915	4.5055102332904	3.72134267037146	0.00518371029835984	0.0128199286948684	0.00574989936886547	INSR/HIF1A/FOS/BCHE/PTGS2	5
BP	GO:0016525	negative regulation of angiogenesis	5/137	153/18888	0.0326797385620915	4.5055102332904	3.72134267037146	0.00518371029835984	0.0128199286948684	0.00574989936886547	TNF/PPARG/STAT1/CXCL10/RELA	5
BP	GO:0045165	cell fate commitment	7/137	289/18888	0.0242214532871972	3.33937817290935	3.42558000101014	0.00518771881952465	0.0128217323541981	0.00575070833277535	TP53/IL6/PPARG/CASP3/BCL2/AR/CDC42	7
BP	GO:0046364	monosaccharide biosynthetic process	4/137	96/18888	0.0416666666666667	5.74452554744526	3.98356089979502	0.00525788393856814	0.0129787412877534	0.00582112881555989	NR3C1/PRKACA/GPI/TPI1	4
BP	GO:0072091	regulation of stem cell proliferation	4/137	96/18888	0.0416666666666667	5.74452554744526	3.98356089979502	0.00525788393856814	0.0129787412877534	0.00582112881555989	TP53/TGFB1/ACE/PIM1	4
BP	GO:0042552	myelination	5/137	154/18888	0.0324675324675325	4.47625367333397	3.70242372384111	0.00532709730034407	0.0131412936557384	0.00589403559845473	PTEN/TNF/AKT1/MAPK1/ERBB2	5
BP	GO:0030850	prostate gland development	3/137	49/18888	0.0612244897959184	8.4409354982869	4.45785782805939	0.00539093028505848	0.0132486093114888	0.0059421680207135	MMP2/AR/ESR1	3
BP	GO:0032369	negative regulation of lipid transport	3/137	49/18888	0.0612244897959184	8.4409354982869	4.45785782805939	0.00539093028505848	0.0132486093114888	0.0059421680207135	AKT1/EGF/PLA2G10	3
BP	GO:0033628	regulation of cell adhesion mediated by integrin	3/137	49/18888	0.0612244897959184	8.4409354982869	4.45785782805939	0.00539093028505848	0.0132486093114888	0.0059421680207135	CYP1B1/CCL5/SYK	3
BP	GO:0045581	negative regulation of T cell differentiation	3/137	49/18888	0.0612244897959184	8.4409354982869	4.45785782805939	0.00539093028505848	0.0132486093114888	0.0059421680207135	IL2/IRF1/ERBB2	3
BP	GO:0048066	developmental pigmentation	3/137	49/18888	0.0612244897959184	8.4409354982869	4.45785782805939	0.00539093028505848	0.0132486093114888	0.0059421680207135	BCL2/BAX/SOD2	3
BP	GO:0048546	digestive tract morphogenesis	3/137	49/18888	0.0612244897959184	8.4409354982869	4.45785782805939	0.00539093028505848	0.0132486093114888	0.0059421680207135	EGFR/BCL2/HIF1A	3
BP	GO:0016125	sterol metabolic process	5/137	155/18888	0.032258064516129	4.44737461737697	3.68366577440128	0.00547327070758232	0.0134340793889811	0.00602535368476039	CYP3A4/CYP1B1/CYP2C9/PON1/PPARD	5
BP	GO:2000181	negative regulation of blood vessel morphogenesis	5/137	155/18888	0.032258064516129	4.44737461737697	3.68366577440128	0.00547327070758232	0.0134340793889811	0.00602535368476039	TNF/PPARG/STAT1/CXCL10/RELA	5
BP	GO:0060993	kidney morphogenesis	4/137	98/18888	0.0408163265306122	5.62729033219127	3.92559917874596	0.00565437751076896	0.0138698971562777	0.00622082343851356	VEGFA/STAT1/BCL2/MYC	4
BP	GO:0009299	mRNA transcription	3/137	50/18888	0.06	8.27211678832117	4.40106727880916	0.00570496927963348	0.0139589673863372	0.00626077255771647	TP53/PPARG/VDR	3
BP	GO:0014911	positive regulation of smooth muscle cell migration	3/137	50/18888	0.06	8.27211678832117	4.40106727880916	0.00570496927963348	0.0139589673863372	0.00626077255771647	CYP1B1/CCL5/BCL2	3
BP	GO:0071827	plasma lipoprotein particle organization	3/137	50/18888	0.06	8.27211678832117	4.40106727880916	0.00570496927963348	0.0139589673863372	0.00626077255771647	PRKACA/MPO/PLA2G10	3
BP	GO:2000404	regulation of T cell migration	3/137	50/18888	0.06	8.27211678832117	4.40106727880916	0.00570496927963348	0.0139589673863372	0.00626077255771647	CCL5/CXCL10/ADAM17	3
BP	GO:1901343	negative regulation of vasculature development	5/137	157/18888	0.0318471337579618	4.39072016365242	3.64662285877144	0.00577409048008335	0.0141192581470456	0.0063326649812836	TNF/PPARG/STAT1/CXCL10/RELA	5
BP	GO:0038202	TORC1 signaling	4/137	99/18888	0.0404040404040404	5.57044901570449	3.89721342189265	0.00585990556272228	0.0142310051690457	0.00638278492707768	AKT1/PRKACA/PIM1/SYK	4
BP	GO:0009151	purine deoxyribonucleotide metabolic process	2/137	16/18888	0.125	17.2335766423358	5.55257968693777	0.00586346530110807	0.0142310051690457	0.00638278492707768	XDH/PNP	2
BP	GO:0030728	ovulation	2/137	16/18888	0.125	17.2335766423358	5.55257968693777	0.00586346530110807	0.0142310051690457	0.00638278492707768	MMP2/NOS3	2
BP	GO:0030810	positive regulation of nucleotide biosynthetic process	2/137	16/18888	0.125	17.2335766423358	5.55257968693777	0.00586346530110807	0.0142310051690457	0.00638278492707768	NOS3/NOS2	2
BP	GO:0034374	low-density lipoprotein particle remodeling	2/137	16/18888	0.125	17.2335766423358	5.55257968693777	0.00586346530110807	0.0142310051690457	0.00638278492707768	MPO/PLA2G10	2
BP	GO:0035729	cellular response to hepatocyte growth factor stimulus	2/137	16/18888	0.125	17.2335766423358	5.55257968693777	0.00586346530110807	0.0142310051690457	0.00638278492707768	IL10/RELA	2
BP	GO:0042772	DNA damage response, signal transduction resulting in transcription	2/137	16/18888	0.125	17.2335766423358	5.55257968693777	0.00586346530110807	0.0142310051690457	0.00638278492707768	TP53/CDKN1A	2
BP	GO:0046325	negative regulation of glucose import	2/137	16/18888	0.125	17.2335766423358	5.55257968693777	0.00586346530110807	0.0142310051690457	0.00638278492707768	TNF/ACE	2
BP	GO:0047484	regulation of response to osmotic stress	2/137	16/18888	0.125	17.2335766423358	5.55257968693777	0.00586346530110807	0.0142310051690457	0.00638278492707768	ABCB1/PTGS2	2
BP	GO:1900373	positive regulation of purine nucleotide biosynthetic process	2/137	16/18888	0.125	17.2335766423358	5.55257968693777	0.00586346530110807	0.0142310051690457	0.00638278492707768	NOS3/NOS2	2
[truncated: 901 more rows]

## Sheet: table S6
category	subcategory	ID	Description	GeneRatio	BgRatio	RichFactor	FoldEnrichment	zScore	pvalue	p.adjust	qvalue	geneID	Count
[truncated: 185 more rows]
